# Supplementary material for: The Aquatic Invertebrate Hydra vulgaris Releases Molecular Messages Through Extracellular Vesicles
Source: Front Cell Dev Biol. 2021 Dec 20;9:788117. doi: 10.3389/fcell.2021.788117 (PMC8721104; doi:10.3389/fcell.2021.788117)
Supplement: Supplementary file 2 [file DataSheet1.xlsx]

## Sheet: results
OrthoID	gene name	ncbi id NCBI	gene biotype	Average TPM	Rank	Detectable in N samples	RNA1 (TPM)	RNA2 (TPM)	Gene Name	KEGG PATHWAY	INTERPRO	protein id	synonyms	uniprot	ncbi id OrthoDB	description	GOBP ID	GOBP Description	GOMF ID	GOMF Description	GOCC ID	GOCC Description
	LOC105849895	105849895		550090	1	2	457911	642270
	LOC105850674	105850674		299410	2	2	328082	270738
6087_0:004d43	LOC105850649	105850649	protein_coding	65616.6	3	2	90191.3	41042				XP_012566551.1	LOC105850649		105850649	LOW QUALITY PROTEIN: putative uncharacterized protein ART2	GO:0007608|GO:0050911	sensory perception of smell|detection of chemical stimulus involved in sensory perception of smell	GO:0004984	olfactory receptor activity	GO:0016021|GO:0016020	integral component of membrane|membrane
6087_0:0048fb	LOC105849894	105849894	protein_coding	40918.6	4	2	65741.6	16095.5				XP_012565798.1	LOC105849894		105849894	uncharacterized protein LOC105849894
	LOC105845613	105845613		17252	5	2	27887.6	6616.36
	LOC101236920	101236920	lncRNA	6257.35	6	2	4509.35	8005.35
6087_0:001aa6	LOC100208569	100208569	protein_coding	2344.67	7	2	1741.23	2948.11				XP_004207918.1	LOC100208569		100208569	ELMO domain-containing protein 2-like
6087_0:00318b	LOC101240956	101240956	protein_coding	1616.46	8	2	1338.77	1894.16				XP_004210190.1	LOC101240956		101240956	putative uncharacterized protein ART2	GO:0007608|GO:0050911	sensory perception of smell|detection of chemical stimulus involved in sensory perception of smell	GO:0004984	olfactory receptor activity	GO:0016021|GO:0016020	integral component of membrane|membrane
	trnad-guc		tRNA	1225.25	9	2	759.953	1690.55
	trnae-uuc		tRNA	950.466	10	2	684.71	1216.22
6087_0:002631	LOC100212984	100212984	protein_coding	723.16	11	2	683.526	762.795				XP_012559082.1	LOC100212984		100212984	glia maturation factor beta-like	GO:0034316|GO:0071846	negative regulation of Arp2/3 complex-mediated actin nucleation|actin filament debranching	GO:0003779|GO:0071933	actin binding|Arp2/3 complex binding	GO:0005622	intracellular anatomical structure
6087_0:0048e7	LOC105849878	105849878	protein_coding	428.471	12	2	287.743	569.2				XP_012565784.1	LOC105849878		105849878	mushroom body large-type Kenyon cell-specific protein 1-like
	trnag-ucc		tRNA	401.513	13	2	413.835	389.191
6087_0:004179	LOC105848752	105848752	protein_coding	324.986	14	2	233.799	416.174				XP_012564410.1	LOC105848752		105848752	putative uncharacterized protein FLJ46204
6087_0:003559	LOC100205733	100205733	protein_coding	271.361	15	2	395.789	146.933				XP_002163264.3	LOC100205733		100205733	zinc-binding alcohol dehydrogenase domain-containing protein 2-like	GO:0055114|GO:0045599	NA|negative regulation of fat cell differentiation	GO:0036132|GO:0008270|GO:0016491	13-prostaglandin reductase activity|zinc ion binding|oxidoreductase activity	GO:0005739	mitochondrion
	lsu-rRNA		rRNA	264.255	16	2	506.543	21.9673
6087_0:002a45	LOC100204308	100204308	protein_coding	230.501	17	2	198.843	262.159				XP_012559892.1	LOC100204308		100204308	disrupted in renal carcinoma protein 2 homolog	GO:0055085	transmembrane transport			GO:0016021|GO:0016020	integral component of membrane|membrane
	trnak-cuu		tRNA	211.577	18	2	174.85	248.304
6087_0:000e95	LOC100198813	100198813	protein_coding	197.44	19	2	200.508	194.373				XP_002153821.1	LOC100198813		100198813	A-kinase anchor protein 17A-like
	trnag-gcc		tRNA	187.374	20	2	100.868	273.88
6087_0:004724	ferritin		protein_coding	187.053	21	2	284.017	90.0898				NP_001274310.1	ferritin	A0S5U1	100205436	Ferritin	GO:0006879|GO:0006880	cellular iron ion homeostasis|intracellular sequestering of iron ion	GO:0004322|GO:0046872|GO:0008199|GO:0005506	ferroxidase activity|metal ion binding|ferric iron binding|iron ion binding	GO:0005623|GO:0005737	NA|cytoplasm
	trnae-cuc		tRNA	185.578	22	2	127.912	243.244
	LOC101236542	101236542		163.475	23	2	140.418	186.531
6087_0:004400	LOC100213788	100213788	protein_coding	158.887	24	2	129.912	187.861				XP_002162094.2	LOC100213788		100213788	vacuolar protein sorting-associated protein 41 homolog
	trnas-gcu		tRNA	134.303	25	2	86.2314	182.375
	trnM		tRNA	128.43	26	2	244.41	12.4491
6087_0:00288b	LOC100201317	100201317	protein_coding	109.539	27	2	91.1596	127.919				XP_002163811.1	LOC100201317		100201317	putative uncharacterized protein ART2	GO:0007608|GO:0050911	sensory perception of smell|detection of chemical stimulus involved in sensory perception of smell	GO:0004984	olfactory receptor activity	GO:0016021|GO:0016020	integral component of membrane|membrane
6087_0:0018e9	LOC100197383	100197383	protein_coding	101.702	28	2	93.1178	110.286	sulfite oxidase-like(LOC100197383)	hmg00920:Sulfur metabolism,	IPR000572:Oxidoreductase, molybdopterin-binding domain,IPR001199:Cytochrome b5-like heme/steroid binding domain,IPR005066:Moybdenum cofactor oxidoreductase, dimerisation,IPR008335:Eukaryotic molybdopterin oxidoreductase,IPR014756:Immunoglobulin E-set,IPR018506:Cytochrome b5, heme-binding site,IPR022407:Oxidoreductase, molybdopterin binding site,	XP_002159185.1	SUOX	T2MF97	100197383	Sulfite oxidase, mitochondrial	GO:0042128|GO:0055114	nitrate assimilation|NA	GO:0016491|GO:0030151|GO:0020037	oxidoreductase activity|molybdenum ion binding|heme binding
	trnaq-uug		tRNA	84.8271	29	2	60.1942	109.46
6087_0:004e3b	COX1		protein_coding	82.5251	30	2	163.356	1.69426				YP_002221538.1	COX1	B4F7N4	6904237	Cytochrome c oxidase subunit 1	GO:0009060|GO:0006123|GO:0055114|GO:0015990|GO:0006119|GO:0022900	aerobic respiration|mitochondrial electron transport, cytochrome c to oxygen|NA|electron transport coupled proton transport|oxidative phosphorylation|electron transport chain	GO:0005506|GO:0004129|GO:0020037|GO:0046872|GO:0016491	iron ion binding|cytochrome-c oxidase activity|heme binding|metal ion binding|oxidoreductase activity	GO:0016021|GO:0005739|GO:0070469|GO:0016020|GO:0005743	integral component of membrane|mitochondrion|respirasome|membrane|mitochondrial inner membrane
6087_0:0012d0	LOC100207674	100207674	protein_coding	78.3622	31	2	94.0439	62.6805				XP_002156372.1	LOC100207674		100207674	glutamine synthetase-like	GO:0006807|GO:0006542	nitrogen compound metabolic process|glutamine biosynthetic process	GO:0003824|GO:0004356|GO:0005524	catalytic activity|glutamate-ammonia ligase activity|ATP binding
6087_0:003956	LOC100202036	100202036	protein_coding	69.4917	32	2	114.101	24.8825	actin, non-muscle 6.2-like(LOC100202036)	hmg04145:Phagosome,	IPR004000:Actin-related protein,IPR004001:Actin, conserved site,IPR020902:Actin/actin-like conserved site,	XP_002154462.1	LOC100202036	P17126	100202036	Actin, non-muscle 6.2			GO:0005524|GO:0000166	ATP binding|nucleotide binding
	LOC105845872	105845872	lncRNA	67.0249	33	2	80.6892	53.3605
6087_0:004bd6	LOC105850368	105850368	protein_coding	58.7341	34	2	108.293	9.17525				XP_012566296.1	LOC105850368		105850368	integumentary mucin C.1-like
	trnac-gca		tRNA	57.6163	35	2	30.0971	85.1356
6087_0:001f5f	LOC100201805	100201805	protein_coding	53.5517	36	2	96.178	10.9255	60S ribosomal protein L24-like(LOC100201805)	hmg03010:Ribosome,	IPR000988:Ribosomal protein L24e-related,IPR011017:TRASH domain,IPR023442:Ribosomal protein L24e, conserved site,	XP_012557679.1	RPL24	T2MDV2	100201805	60S ribosomal protein L24	GO:1902626|GO:0000027	assembly of large subunit precursor of preribosome|ribosomal large subunit assembly
	trnal-uag		tRNA	53.2467	37	2	58.5003	47.9931
6087_0:00298d	LOC100211522	100211522	protein_coding	52.0782	38	2	84.0449	20.1116				XP_012559738.1	LOC100211522		100211522	Y-box factor homolog			GO:0003676	nucleic acid binding	GO:0005737|GO:0005829	cytoplasm|cytosol
	trnap-ugg		tRNA	49.7837	39	2	75.2428	24.3245
6087_0:000124	LOC100206683	100206683	protein_coding	48.1277	40	2	86.7836	9.47179	elongation factor 1-alpha(LOC100206683)	hmg03013:RNA transport,	IPR000795:Elongation factor, GTP-binding domain,IPR004160:Translation elongation factor EFTu/EF1A, C-terminal,IPR004161:Translation elongation factor EFTu/EF1A, domain 2,IPR004539:Translation elongation factor EF1A, eukaryotic/archaeal,IPR009000:Translation elongation/initiation factor/Ribosomal, beta-barrel,IPR009001:Translation elongation factor EF1A/initiation factor IF2gamma, C-terminal,IPR02…	XP_004205522.1	EEF1A2;EF-1-alpha	P51554	100206683	Elongation factor 1-alpha			GO:0003924|GO:0005525|GO:0000166	GTPase activity|GTP binding|nucleotide binding	GO:0005622|GO:0005737	intracellular anatomical structure|cytoplasm
6087_0:0038fe	LOC100198082	100198082	protein_coding	45.318	41	2	30.409	60.2271	sulfatase-modifying factor 1-like(LOC100198082)	hmg04142:Lysosome,		XP_002155473.2	LOC100198082		100198082	sulfatase-modifying factor 1-like			GO:0042803	protein homodimerization activity	GO:0005783	endoplasmic reticulum
6087_0:00363e	LOC100204518	100204518	protein_coding	40.3929	42	2	56.2541	24.5318				XP_012562266.1	LOC100204518		100204518	putative uncharacterized protein YGR160W
	trnam-cau		tRNA	38.2711	43	2	29.2208	47.3215
6087_0:004cc2	LOC105850540	105850540	protein_coding	37.2818	44	2	69.0145	5.54906				XP_012566460.1	LOC105850540		105850540	mucin-2-like
	LOC101237386	101237386	lncRNA	35.025	45	2	55.7621	14.2879
6087_0:000586	LOC100201184	100201184	protein_coding	34.5703	46	2	59.7575	9.38303				XP_012562219.1	LOC100201184		100201184	glycine-rich RNA-binding protein 1-like			GO:0003676	nucleic acid binding
6087_0:001d36	LOC100202286	100202286	protein_coding	33.4246	47	2	62.3083	4.5408				XP_004208165.1	LOC100202286		100202286	heat shock 70 kDa protein cognate 1-like
6087_0:0005c3	LOC100201638	100201638	protein_coding	33.1054	48	2	24.1066	42.1042				XP_002157977.1	LOC100201638		100201638	uncharacterized protein LOC100201638	GO:0006950	response to stress
6087_0:0001ec	LOC100199163	100199163	protein_coding	30.2437	49	2	52.2139	8.2736	60S acidic ribosomal protein P2-like(LOC100199163)	hmg03010:Ribosome,		XP_012554980.1	LOC100199163		100199163	60S acidic ribosomal protein P2-like	GO:0002181	cytoplasmic translation			GO:0005622	intracellular anatomical structure
	trnan-guu		tRNA	30.0831	50	2	14.1722	45.9941
6087_0:002b7b	LOC100199467	100199467	protein_coding	29.2626	51	2	51.6971	6.82816	60S ribosomal protein L13-like(LOC100199467)	hmg03010:Ribosome,		XP_012560108.1	LOC100199467		100199467	60S ribosomal protein L13-like					GO:0005622	intracellular anatomical structure
6087_0:00359b	LOC100202274	100202274	protein_coding	29.2078	52	2	49.3323	9.08334				XP_012562130.1	LOC100202274		100202274	cell division control protein 45 homolog
6087_0:003b9d	LOC105847988	105847988	protein_coding	29.1189	53	2	53.4691	4.76878				XP_012563328.1	LOC105847988		105847988	histone H2B, gonadal-like	GO:0006334	nucleosome assembly	GO:0046982	protein heterodimerization activity	GO:0005634|GO:0005694	nucleus|chromosome
	trnag-ccc		tRNA	28.7778	54	2	7.75906	49.7965
6087_0:00104d	LOC100212156	100212156	protein_coding	28.117	55	2	43.092	13.142	60S ribosomal protein L37-A-like(LOC100212156)	hmg03010:Ribosome,		XP_004206873.1	LOC100212156		100212156	60S ribosomal protein L37-A-like			GO:0046872|GO:0019843	metal ion binding|rRNA binding	GO:0005622	intracellular anatomical structure
6087_0:00421b	LOC100211442	100211442	protein_coding	27.974	56	2	44.8245	11.1236	40S ribosomal protein S2-like(LOC100211442)	hmg03010:Ribosome,		XP_004211930.2	LOC100211442		100211442	40S ribosomal protein S2-like					GO:0015935	small ribosomal subunit
6087_0:001d32	LOC100205911	100205911	protein_coding	27.1564	57	2	48.0334	6.27947	heat shock 70 kDa protein-like(LOC100205911)	hmg03040:Spliceosome,hmg04141:Protein processing in endoplasmic reticulum,hmg04144:Endocytosis,		XP_012557227.1	LOC100205911		100205911	heat shock 70 kDa protein-like
6087_0:004d39	LOC100204347	100204347	protein_coding	26.7636	58	2	50.5822	2.94504				XP_002164221.1	LOC100204347		100204347	histone H3	GO:0006334	nucleosome assembly	GO:0046982|GO:0031492	protein heterodimerization activity|nucleosomal DNA binding	GO:0005634|GO:0005694	nucleus|chromosome
6087_0:003b70	LOC100203728	100203728	protein_coding	26.6867	59	2	45.3229	8.05051	ubiquitin-60S ribosomal protein L40(LOC100203728)	hmg03010:Ribosome,		XP_012563293.1	LOC100203728		100203728	ubiquitin-60S ribosomal protein L40
6087_0:003bec	LOC100202980	100202980	protein_coding	25.909	60	2	46.4075	5.41041	40S ribosomal protein S12-like(LOC100202980)	hmg03010:Ribosome,	IPR000530:Ribosomal protein S12e,IPR004038:Ribosomal protein L7Ae/L30e/S12e/Gadd45,	XP_002155359.2	RPS12	T2MGY7	100202980	40S ribosomal protein S12					GO:0005622	intracellular anatomical structure
	LOC101240314	101240314	lncRNA	25.898	61	2	38.3386	13.4573
6087_0:000c20	LOC105843221	105843221	protein_coding	25.161	62	2	43.2993	7.02269				XP_012553741.1	LOC105843221		105843221	ADP,ATP carrier protein 3, mitochondrial-like	GO:0055085|GO:0046902	transmembrane transport|regulation of mitochondrial membrane permeability			GO:0005743|GO:0005739|GO:0016020|GO:0016021	mitochondrial inner membrane|mitochondrion|membrane|integral component of membrane
6087_0:003cb5	LOC105848110	105848110	protein_coding	25.0408	63	2	47.6863	2.3954				XP_012563527.1	LOC105848110		105848110	mucin-5AC-like
	LOC105848828	105848828	lncRNA	24.6219	64	2	48.1895	1.05421
6087_0:0011d6	LOC100202227	100202227	protein_coding	23.6932	65	2	37.6736	9.7128	60S ribosomal protein L32-like(LOC100202227)	hmg03010:Ribosome,		XP_002166888.1	LOC100202227		100202227	60S ribosomal protein L32-like					GO:0005622	intracellular anatomical structure
6087_0:0006be	LOC100206987	100206987	protein_coding	23.4111	66	2	32.347	14.4752	actin, non-muscle 6.2-like(LOC100206987)	hmg04145:Phagosome,		XP_002154696.1	LOC100206987		100206987	actin, non-muscle 6.2-like			GO:0005524|GO:0000166	ATP binding|nucleotide binding
6087_0:0038e6	LOC100199191	100199191	protein_coding	23.178	67	2	30.3062	16.0498	tubulin beta chain(LOC100199191)	hmg04145:Phagosome,		XP_002161860.1	LOC100199191		100199191	tubulin beta chain	GO:0007017|GO:0007010	microtubule-based process|cytoskeleton organization	GO:0005200|GO:0005525|GO:0003924|GO:0000166	structural constituent of cytoskeleton|GTP binding|GTPase activity|nucleotide binding	GO:0005874|GO:0005737|GO:0005856	microtubule|cytoplasm|cytoskeleton
6087_0:0005ba	LOC100215540	100215540	protein_coding	22.4975	68	2	39.6681	5.32684	60S ribosomal protein L10-like(LOC100215540)	hmg03010:Ribosome,	IPR001197:Ribosomal protein L10e,IPR016180:Ribosomal protein L10e/L16,IPR018255:Ribosomal protein L10e, conserved site,	XP_002161791.1	LOC100215540	Q6LCG6	100215540	Ribosomal protein L10	GO:0000027	ribosomal large subunit assembly			GO:0005622	intracellular anatomical structure
	LOC101234785	101234785	lncRNA	21.5813	69	2	37.5536	5.60906
6087_0:002c54	LOC100198579	100198579	protein_coding	21.4799	70	2	37.3682	5.59164				XP_012560276.1	LOC100198579		100198579	cofilin-like	GO:0030042	actin filament depolymerization	GO:0003779|GO:0051015	actin binding|actin filament binding	GO:0015629|GO:0005622	actin cytoskeleton|intracellular anatomical structure
6087_0:0005b1	LOC100203649	100203649	protein_coding	21.4626	71	2	37.9863	4.9389	60S ribosomal protein L18-like(LOC100203649)	hmg03010:Ribosome,		XP_012562532.1	LOC100203649		100203649	60S ribosomal protein L18-like					GO:0005622	intracellular anatomical structure
6087_0:002656	LOC105845661	105845661	protein_coding	21.0582	72	2	21.3222	20.7941				XP_012559115.1	LOC105845661		105845661	protein MNN4-like
6087_0:000615	LOC100212223	100212223	protein_coding	20.4856	73	2	34.2251	6.74614	40S ribosomal protein S9(LOC100212223)	hmg03010:Ribosome,	IPR001912:Ribosomal protein S4/S9, N-terminal,IPR002942:RNA-binding S4 domain,IPR005710:Ribosomal protein S4/S9, eukaryotic/archaeal,IPR018079:Ribosomal protein S4, conserved site,IPR022801:Ribosomal protein S4/S9,	XP_002156853.1	RPS9	T2MFP2	100212223	40S ribosomal protein S9	GO:0045903	positive regulation of translational fidelity	GO:0019843	rRNA binding	GO:0015935|GO:0005622	small ribosomal subunit|intracellular anatomical structure
	trnar-ccu		tRNA	20.4828	74	2	29.1417	11.824
	LOC100214348	100214348	lncRNA	20.2976	75	2	33.2499	7.34531
6087_0:000322	LOC100208510	100208510	protein_coding	20.2713	76	2	38.1126	2.42997				XP_002158733.2	LOC100208510		100208510	histone H2B, gonadal-like	GO:0006334	nucleosome assembly	GO:0046982	protein heterodimerization activity	GO:0005634|GO:0005694	nucleus|chromosome
6087_0:000386	LOC100199000	100199000	protein_coding	19.9935	77	2	32.9736	7.01342	40S ribosomal protein S25-like(LOC100199000)	hmg03010:Ribosome,	IPR004977:Ribosomal protein S25,	XP_002163815.1	RPS25	T2ME48	100199000	40S ribosomal protein S25
6087_0:004567	LOC100215958	100215958	protein_coding	19.981	78	2	31.077	8.88505	60S ribosomal protein L18a-like(LOC100215958)	hmg03010:Ribosome,	IPR021138:Ribosomal protein L18a,IPR023573:Ribosomal protein L18a/LX,	XP_002166736.1	RPL18A	T2ME58	100215958	60S ribosomal protein L18a
6087_0:001197	LOC100207752	100207752	protein_coding	19.9546	79	2	34.9432	4.96608	60S ribosomal protein L23a-like(LOC100207752)	hmg03010:Ribosome,		XP_002159053.1	LOC100207752		100207752	60S ribosomal protein L23a-like	GO:0000027	ribosomal large subunit assembly			GO:0005622	intracellular anatomical structure
6087_0:0023dc	LOC100197513	100197513	protein_coding	19.8777	80	2	33.1648	6.5906	tubulin alpha-1D chain(LOC100197513)	hmg04145:Phagosome,		XP_004208788.1	LOC100197513		100197513	tubulin alpha-1D chain	GO:0007010|GO:0007017	cytoskeleton organization|microtubule-based process	GO:0005525|GO:0003924|GO:0000166|GO:0005200	GTP binding|GTPase activity|nucleotide binding|structural constituent of cytoskeleton	GO:0005856|GO:0005737|GO:0005874	cytoskeleton|cytoplasm|microtubule
	LOC105848111	105848111	lncRNA	19.8729	81	2	37.8186	1.92727
6087_0:000937	LOC100212621	100212621	protein_coding	19.8477	82	2	34.3141	5.3812				XP_002158413.2	LOC100212621		100212621	polyubiquitin-B
6087_0:001159	LOC100209410	100209410	protein_coding	19.4636	83	2	34.674	4.25317	60S ribosomal protein L36-like(LOC100209410)	hmg03010:Ribosome,	IPR000509:Ribosomal protein L36e,	XP_004206975.1	RPL36	T2M2T4	100209410	60S ribosomal protein L36	GO:0002181	cytoplasmic translation			GO:0005622	intracellular anatomical structure
	trnal-uaa		tRNA	18.8862	84	1	0	37.7724
6087_0:000c87	LOC100203379	100203379	protein_coding	18.8653	85	2	31.3983	6.33221	60S ribosomal protein L5-like(LOC100203379)	hmg03010:Ribosome,	IPR005485:Ribosomal protein L5 eukaryotic/L18 archaeal,IPR025607:Ribosomal protein L5 eukaryotic/L18 archaeal, C-terminal,	XP_004206528.1	RPL5	T2MG51	100203379	60S ribosomal protein L5	GO:0000027	ribosomal large subunit assembly	GO:0008097	5S rRNA binding	GO:0005622	intracellular anatomical structure
	trnah-gug		tRNA	18.8107	86	1	37.6214	0
6087_0:0035e0	LOC100204711	100204711	protein_coding	18.789	87	2	31.4547	6.12323				XP_002164910.2	LOC100204711		100204711	uncharacterized protein LOC100204711
6087_0:0018bc	LOC100211808	100211808	protein_coding	18.7369	88	2	11.8299	25.6439				XP_002159916.1	LOC100211808		100211808	reticulon-3-B-like					GO:0016020|GO:0005783|GO:0005789|GO:0016021	membrane|endoplasmic reticulum|endoplasmic reticulum membrane|integral component of membrane
6087_0:000774	LOC100213980	100213980	protein_coding	18.3955	89	2	29.7047	7.08624	60S ribosomal protein L31-like(LOC100213980)	hmg03010:Ribosome,		XP_004206070.1	LOC100213980		100213980	60S ribosomal protein L31-like	GO:0002181	cytoplasmic translation			GO:0005622	intracellular anatomical structure
6087_0:002dc4	nb001		protein_coding	18.3871	90	2	27.6883	9.08584				NP_001267812.1	nb001	G7H7V9	100210783	Minicollagen 6
6087_0:003d89	LOC100207460	100207460	protein_coding	18.3664	91	2	30.8169	5.91592	60S ribosomal protein L34-like(LOC100207460)	hmg03010:Ribosome,	IPR008195:Ribosomal protein L34Ae,	XP_012563671.1	RPL34	T2MF37	100207460	60S ribosomal protein L34	GO:0006281	DNA repair	GO:0004519	endonuclease activity
6087_0:001c39	LOC100198765	100198765	protein_coding	18.2456	92	2	31.7831	4.70811	60S ribosomal protein L9-like(LOC100198765)	hmg03010:Ribosome,	IPR000702:Ribosomal protein L6,IPR020040:Ribosomal protein L6, alpha-beta domain,	XP_002159380.1	RPL9	T2MGQ9	100198765	60S ribosomal protein L9	GO:0002181	cytoplasmic translation	GO:0019843	rRNA binding	GO:0005622	intracellular anatomical structure
6087_0:002cbb	LOC100206175	100206175	protein_coding	18.2391	93	2	30.1803	6.2978	40S ribosomal protein S21-like(LOC100206175)	hmg03010:Ribosome,		XP_002168114.2	LOC100206175		100206175	40S ribosomal protein S21-like isoform X1	GO:0000461|GO:0000447	endonucleolytic cleavage to generate mature 3'-end of SSU-rRNA from (SSU-rRNA, 5.8S rRNA, LSU-rRNA)|endonucleolytic cleavage in ITS1 to separate SSU-rRNA from 5.8S rRNA and LSU-rRNA from tricistronic rRNA transcript (SSU-rRNA, 5.8S rRNA, LSU-rRNA)			GO:0005622|GO:0005737	intracellular anatomical structure|cytoplasm
	trnak-uuu		tRNA	18.2136	94	1	36.4271	0
6087_0:001028	LOC100200319	100200319	protein_coding	18.1856	95	2	28.0259	8.34527	60S acidic ribosomal protein P1-like(LOC100200319)	hmg03010:Ribosome,	IPR027534:Ribosomal protein L12 family,	XP_004206862.1	RPLP1	T2MHX0	100200319	60S acidic ribosomal protein P1	GO:0045860|GO:0002181	positive regulation of protein kinase activity|cytoplasmic translation	GO:0030295	protein kinase activator activity	GO:0005622	intracellular anatomical structure
6087_0:001489	LOC100206469	100206469	protein_coding	17.8974	96	2	30.0241	5.77071	40S ribosomal protein S26-like(LOC100206469)	hmg03010:Ribosome,		XP_002164679.1	LOC100206469		100206469	40S ribosomal protein S26-like			GO:0003729	mRNA binding	GO:0005622	intracellular anatomical structure
6087_0:00222d	LOC100200741	100200741	protein_coding	17.8761	97	2	26.8899	8.86239				XP_002159337.1	LOC100200741		100200741	profilin-like	GO:0042989	sequestering of actin monomers	GO:0003785|GO:0003779	actin monomer binding|actin binding	GO:0005856|GO:0005938|GO:0015629	cytoskeleton|cell cortex|actin cytoskeleton
6087_0:00059c	LOC100212471	100212471	protein_coding	17.8448	98	2	20.3273	15.3622	uncharacterized LOC100212471(LOC100212471)		IPR008160:Collagen triple helix repeat,	NP_001267884.1	LOC100212471	G7H7W4	100212471	Minicollagen 11
6087_0:003419	LOC100215772	100215772	protein_coding	17.8177	99	2	27.6313	8.00418	60S ribosomal protein L26-like(LOC100215772)	hmg03010:Ribosome,	IPR005756:Ribosomal protein L26/L24P, eukaryotic/archaeal,IPR008991:Translation protein SH3-like domain,IPR014722:Ribosomal protein L2 domain 2,	XP_012561833.1	RPL26	T2MFD2	100215772	60S ribosomal protein L26	GO:0042273|GO:0002181	ribosomal large subunit biogenesis|cytoplasmic translation			GO:0015934|GO:0005622	large ribosomal subunit|intracellular anatomical structure
6087_0:002ec1	LOC100203239	100203239	protein_coding	17.7501	100	2	30.6082	4.89196	40S ribosomal protein SA(LOC100203239)	hmg03010:Ribosome,		XP_002156320.1	LOC100203239		100203239	40S ribosomal protein SA	GO:0000028|GO:0006407|GO:0000447|GO:0000461	ribosomal small subunit assembly|rRNA export from nucleus|endonucleolytic cleavage in ITS1 to separate SSU-rRNA from 5.8S rRNA and LSU-rRNA from tricistronic rRNA transcript (SSU-rRNA, 5.8S rRNA, LSU-rRNA)|endonucleolytic cleavage to generate mature 3'-end of SSU-rRNA from (SSU-rRNA, 5.8S rRNA, LSU-rRNA)			GO:0005622|GO:0015935|GO:0005737|GO:0005634|GO:0030686	intracellular anatomical structure|small ribosomal subunit|cytoplasm|nucleus|90S preribosome
6087_0:0004a9	LOC100198297	100198297	protein_coding	17.6846	101	2	31.1697	4.19947	40S ribosomal protein S7-like(LOC100198297)	hmg03010:Ribosome,	IPR000554:Ribosomal protein S7e,	XP_002164495.1	RPS7	T2MER2	100198297	40S ribosomal protein S7					GO:0005622	intracellular anatomical structure
6087_0:001ec9	LOC101236767	101236767	protein_coding	17.6671	102	2	29.0676	6.2666	40S ribosomal protein S24-like(LOC101236767)	hmg03010:Ribosome,		XP_004208304.1	LOC101236767		101236767	40S ribosomal protein S24-like isoform X1					GO:0005622	intracellular anatomical structure
6087_0:001e54	LOC105844893	105844893	protein_coding	17.6485	103	2	33.4925	1.80459				XP_012557453.1	LOC105844893		105844893	cell wall protein DAN4-like
6087_0:001a04	LOC100200285	100200285	protein_coding	17.3657	104	2	31.0421	3.6893	40S ribosomal protein S6-like(LOC100200285)	hmg03010:Ribosome,hmg04150:mTOR signaling pathway,	IPR001377:Ribosomal protein S6e,IPR014401:Ribosomal protein S6, eukaryotic,IPR018282:Ribosomal protein S6e, conserved site,	XP_004207839.1	RPS6	T2MEN2	100200285	40S ribosomal protein S6	GO:0042274	ribosomal small subunit biogenesis			GO:0005622	intracellular anatomical structure
	LOC105849862	105849862	lncRNA	17.3513	105	2	34.2926	0.409901
6087_0:0044bf	LOC105849223	105849223	protein_coding	17.2746	106	1	34.5492	0				XP_012565011.1	LOC105849223		105849223	protein starmaker-like
6087_0:00181d	LOC100208095	100208095	protein_coding	17.2169	107	2	29.7872	4.64664	60S ribosomal protein L7-like(LOC100208095)	hmg03010:Ribosome,		XP_002166340.2	LOC100208095		100208095	60S ribosomal protein L7-like	GO:0000463|GO:0002181	maturation of LSU-rRNA from tricistronic rRNA transcript (SSU-rRNA, 5.8S rRNA, LSU-rRNA)|cytoplasmic translation
6087_0:00477d	LOC100215276	100215276	protein_coding	17.2091	108	2	29.9023	4.51588	60S ribosomal protein L27a-like(LOC100215276)	hmg03010:Ribosome,	IPR001196:Ribosomal protein L15, conserved site,IPR021131:Ribosomal protein L18e/L15P,	XP_002164954.1	RPL27A	T2MF90	100215276	60S ribosomal protein L27a	GO:0002181	cytoplasmic translation			GO:0005622|GO:0015934	intracellular anatomical structure|large ribosomal subunit
6087_0:002ba1	LOC101235516	101235516	protein_coding	16.898	109	1	33.796	0	histone H1-delta-like(LOC101235516)		IPR005818:Histone H1/H5,IPR005819:Histone H5,IPR011991:Winged helix-turn-helix DNA-binding domain,	XP_004209567.2	H1F0	T2MHA3	101235516	Histone H1.0	GO:0006334	nucleosome assembly			GO:0005694|GO:0005634	chromosome|nucleus
	LOC100214998	100214998	lncRNA	16.8331	110	2	25.8187	7.84759
6087_0:0000f4	LOC100205970	100205970	protein_coding	16.5604	111	2	27.437	5.68389				XP_002157650.2	LOC100205970		100205970	thioredoxin-like	GO:0006662|GO:0034599|GO:0055114	glycerol ether metabolic process|cellular response to oxidative stress|NA	GO:0047134|GO:0016671|GO:0004791	protein-disulfide reductase activity|oxidoreductase activity, acting on a sulfur group of donors, disulfide as acceptor|thioredoxin-disulfide reductase activity	GO:0005737|GO:0005623	cytoplasm|NA
6087_0:001752	LOC100206048	100206048	protein_coding	16.5308	112	2	30.7851	2.27649	betaine--homocysteine S-methyltransferase 1-like(LOC100206048)	hmg00260:Glycine, serine and threonine metabolism,hmg00270:Cysteine and methionine metabolism,hmg01100:Metabolic pathways,	IPR003726:Homocysteine S-methyltransferase,IPR017226:Betaine-homocysteine S-methyltransferase, BHMT,	XP_012556069.1	BHMT	T2M8L7	100206048	Betaine--homocysteine S-methyltransferase 1	GO:0009086|GO:0032259	methionine biosynthetic process|methylation	GO:0047150|GO:0008270|GO:0046872|GO:0016740	betaine-homocysteine S-methyltransferase activity|zinc ion binding|metal ion binding|transferase activity	GO:0005737	cytoplasm
	LOC105847835	105847835	lncRNA	16.4097	113.5	1	32.8195	0
	trnW		tRNA	16.4097	113.5	1	32.8195	0
6087_0:001c49	LOC100213967	100213967	protein_coding	16.279	115	2	30.7437	1.8143	40S ribosomal protein S18(LOC100213967)	hmg03010:Ribosome,	IPR001892:Ribosomal protein S13,IPR010979:Ribosomal protein S13-like, H2TH,IPR018269:Ribosomal protein S13, conserved site,IPR027437:30s ribosomal protein S13, C-terminal,	XP_002155929.1	RPS18	T2MEP2	100213967	40S ribosomal protein S18			GO:0003676	nucleic acid binding	GO:0005622|GO:0005829|GO:0015935	intracellular anatomical structure|cytosol|small ribosomal subunit
6087_0:001fec	LOC100215004	100215004	protein_coding	16.1246	116	2	12.8129	19.4363				XP_004208415.1	LOC100215004		100215004	uncharacterized protein LOC100215004
	trnal-caa		tRNA	15.9291	117	2	22.5575	9.30084
6087_0:000d94	LOC100203780	100203780	protein_coding	15.9008	118	2	24.5299	7.27173	40S ribosomal protein S15-like(LOC100203780)	hmg03010:Ribosome,	IPR002222:Ribosomal protein S19/S15,IPR005713:Ribosomal protein S19A/S15e,IPR020934:Ribosomal protein S19 conserved site,IPR023575:Ribosomal protein S19, superfamily,	XP_002155170.1	RPS15	T2MF39	100203780	40S ribosomal protein S15	GO:0000028	ribosomal small subunit assembly			GO:0015935	small ribosomal subunit
	LOC105849861	105849861	lncRNA	15.8411	119	2	28.8228	2.85945
6087_0:00105b	LOC100203038	100203038	protein_coding	15.7819	120	2	26.9127	4.65106	60S acidic ribosomal protein P0-like(LOC100203038)	hmg03010:Ribosome,	IPR001790:Ribosomal protein L10/acidic P0,	XP_002154455.2	RPLP0	T2MHT8	100203038	60S acidic ribosomal protein P0					GO:0005622	intracellular anatomical structure
6087_0:0019f0	LOC100201221	100201221	protein_coding	15.5355	121	2	26.0536	5.01738	14-3-3 protein zeta-like(LOC100201221)		IPR000308:14-3-3 protein,IPR023409:14-3-3 protein, conserved site,IPR023410:14-3-3 domain,	NP_001274280.1	LOC100201221	J7HZU4	100201221	14-3-3 protein			GO:0019904|GO:0042802	protein domain specific binding|identical protein binding
6087_0:0006c7	LOC100212109	100212109	protein_coding	15.4996	122	2	25.4407	5.55846	60S ribosomal protein L23-like(LOC100212109)	hmg03010:Ribosome,	IPR000218:Ribosomal protein L14b/L23e,IPR019972:Ribosomal protein L14 conserved site,	XP_002161668.2	RPL23	T2MF02	100212109	60S ribosomal protein L23			GO:0070180	large ribosomal subunit rRNA binding
6087_0:0015f8	LOC100213722	100213722	protein_coding	15.4887	123	2	27.5181	3.45923	60S ribosomal protein L11-like(LOC100213722)	hmg03010:Ribosome,		XP_012555789.1	LOC100213722		100213722	60S ribosomal protein L11-like isoform X1	GO:0000027	ribosomal large subunit assembly			GO:0005622	intracellular anatomical structure
6087_0:00305d	LOC101234471	101234471	protein_coding	15.4757	124	2	16.4696	14.4819				XP_004210043.2	LOC101234471		101234471	integumentary mucin C.1-like
6087_0:0034ac	LOC100205615	100205615	protein_coding	15.3781	125	2	28.0304	2.72576	60S ribosomal protein L28-like(LOC100205615)	hmg03010:Ribosome,	IPR002672:Ribosomal protein L28e,	XP_004210536.1	RPL28	T2MG81	100205615	60S ribosomal protein L28					GO:0005622	intracellular anatomical structure
6087_0:00272d	LOC100210748	100210748	protein_coding	15.3437	126	2	24.3141	6.37323	ubiquitin-40S ribosomal protein S27a(LOC100210748)	hmg03010:Ribosome,	IPR000626:Ubiquitin,IPR002906:Ribosomal protein S27a,IPR011332:Ribosomal protein, zinc-binding domain,IPR019954:Ubiquitin conserved site,IPR019956:Ubiquitin subgroup,	XP_002163070.1	RPS27A	T2MEI7	100210748	Ubiquitin-40S ribosomal protein S27a
6087_0:001efb	LOC100197873	100197873	protein_coding	15.1733	127	2	25.5799	4.76666	60S ribosomal protein L37a-like(LOC100197873)	hmg03010:Ribosome,	IPR002674:Ribosomal protein L37ae,IPR011331:Ribosomal protein L37ae/L37e,IPR011332:Ribosomal protein, zinc-binding domain,	XP_002164628.1	RPL37A	T2MED6	100197873	60S ribosomal protein L37a					GO:0005622	intracellular anatomical structure
6087_0:0040c9	LOC100209015	100209015	protein_coding	15.014	128	2	23.2283	6.79963	40S ribosomal protein S3a-like(LOC100209015)	hmg03010:Ribosome,		XP_004211786.1	LOC100209015		100209015	40S ribosomal protein S3a-like	GO:0002181	cytoplasmic translation			GO:0005737|GO:0005622|GO:0005829	cytoplasm|intracellular anatomical structure|cytosol
6087_0:000a57	LOC100202765	100202765	protein_coding	14.9452	129	2	27.8837	2.00668				XP_002166874.2	LOC100202765		100202765	fibrillin-2-like isoform X1					GO:0016021	integral component of membrane
6087_0:00300f	LOC100211983	100211983	protein_coding	14.9179	130	2	24.973	4.86282	40S ribosomal protein S10-like(LOC100211983)	hmg03010:Ribosome,		XP_002161747.1	LOC100211983		100211983	40S ribosomal protein S10-like	GO:0000028	ribosomal small subunit assembly
6087_0:004208	LOC100208689	100208689	protein_coding	14.8648	131	2	29.2277	0.501862				XP_012564498.1	LOC100208689		100208689	properdin-like					GO:0005578	NA
6087_0:001e05	LOC100207455	100207455	protein_coding	14.7293	132	2	23.2115	6.24718	60S ribosomal protein L30-like(LOC100207455)	hmg03010:Ribosome,		XP_002161509.1	LOC100207455		100207455	60S ribosomal protein L30-like	GO:0002181	cytoplasmic translation			GO:0005622	intracellular anatomical structure
6087_0:00170a	LOC100206898	100206898	protein_coding	14.7204	133	2	26.4632	2.97763	40S ribosomal protein S19-like(LOC100206898)	hmg03010:Ribosome,		XP_002154669.1	LOC100206898		100206898	40S ribosomal protein S19-like	GO:0000028	ribosomal small subunit assembly			GO:0005622	intracellular anatomical structure
6087_0:003335	LOC101240323	101240323	protein_coding	14.5751	134	2	27.407	1.74326				XP_012561641.1	LOC101240323		101240323	neuroblast differentiation-associated protein AHNAK					GO:0005737|GO:0005634	cytoplasm|nucleus
6087_0:0021d6	LOC101240604	101240604	protein_coding	14.5659	135	2	26.623	2.50882	60S ribosomal protein L27-like(LOC101240604)	hmg03010:Ribosome,	IPR001141:Ribosomal protein L27e,IPR005824:KOW,IPR008991:Translation protein SH3-like domain,IPR014722:Ribosomal protein L2 domain 2,IPR018262:Ribosomal protein L27e, conserved site,	XP_012558178.1	RPL27	T2MEU9	101240604	60S ribosomal protein L27					GO:0005622	intracellular anatomical structure
6087_0:00015f	LOC100203041	100203041	protein_coding	14.5289	136	2	22.7598	6.298				XP_004205543.1	LOC100203041		100203041	polyubiquitin-B
6087_0:0032ff	LOC100203639	100203639	protein_coding	14.243	137	2	25.4217	3.06426	60S ribosomal protein L6-like(LOC100203639)	hmg03010:Ribosome,		XP_002164071.1	LOC100203639		100203639	60S ribosomal protein L6-like	GO:0002181|GO:0000027	cytoplasmic translation|ribosomal large subunit assembly			GO:0005622	intracellular anatomical structure
	LOC105846868	105846868	lncRNA	14.1692	138	1	27.9951	0.343223
6087_0:003b9b	LOC100212410	100212410	protein_coding	14.0363	139	2	26.6784	1.39422				XP_004211232.1	LOC100212410		100212410	histone H2A-beta, sperm			GO:0046982	protein heterodimerization activity	GO:0005694|GO:0005634	chromosome|nucleus
6087_0:00285e	LOC100207147	100207147	protein_coding	13.9396	140	2	20.8258	7.05335				XP_002154280.1	LOC100207147		100207147	soma ferritin-like	GO:0006879|GO:0006880	cellular iron ion homeostasis|intracellular sequestering of iron ion	GO:0004322|GO:0046872|GO:0008199|GO:0005506	ferroxidase activity|metal ion binding|ferric iron binding|iron ion binding	GO:0005623|GO:0005737	NA|cytoplasm
6087_0:000633	LOC100199560	100199560	protein_coding	13.8353	141	2	21.954	5.71658	translationally-controlled tumor protein homolog(LOC100199560)		IPR011057:Mss4-like,IPR011323:Mss4/translationally controlled tumour-associated TCTP,IPR018103:Translationally controlled tumour protein, conserved site,IPR018105:Translationally controlled tumour protein,	XP_002160985.1	TCTP	Q94587	100199560	Translationally-controlled tumor protein homolog	GO:0002181|GO:0034599	cytoplasmic translation|cellular response to oxidative stress			GO:0005739|GO:0010494|GO:0005829	mitochondrion|cytoplasmic stress granule|cytosol
6087_0:002134	LOC100206814	100206814	protein_coding	13.7641	142	2	22.8405	4.6877	40S ribosomal protein S15a-like(LOC100206814)	hmg03010:Ribosome,	IPR000630:Ribosomal protein S8,	XP_004208537.1	RPS15A	T2MES1	100206814	40S ribosomal protein S15a
6087_0:001f25	LOC100208996	100208996	protein_coding	13.6908	143	2	22.1804	5.20113	60S ribosomal protein L4-B-like(LOC100208996)	hmg03010:Ribosome,	IPR002136:Ribosomal protein L4/L1e,IPR013000:Ribosomal protein L4/L1e, eukaryotic/archaeal, conserved site,IPR023574:Ribosomal protein L4 domain,IPR025755:60S ribosomal protein L4, C-terminal domain,	XP_002157151.1	RPL4	T2MGG1	100208996	60S ribosomal protein L4	GO:0002181	cytoplasmic translation
6087_0:0048a1	LOC100198506	100198506	protein_coding	13.6857	144	2	24.7815	2.5898	40S ribosomal protein S4-like(LOC100198506)	hmg03010:Ribosome,	IPR000876:Ribosomal protein S4e,IPR002942:RNA-binding S4 domain,IPR005824:KOW,IPR013843:Ribosomal protein S4e, N-terminal,IPR013845:Ribosomal protein S4e, central region,IPR018199:Ribosomal protein S4e, N-terminal, conserved site,	XP_002154886.1	RPS4X	T2MEL2	100198506	40S ribosomal protein S4			GO:0019843	rRNA binding	GO:0005622	intracellular anatomical structure
6087_0:001ed7	LOC100199663	100199663	protein_coding	13.6797	145	2	23.6743	3.68511	60S ribosomal protein L3-like(LOC100199663)	hmg03010:Ribosome,	IPR000597:Ribosomal protein L3,IPR009000:Translation elongation/initiation factor/Ribosomal, beta-barrel,IPR019926:Ribosomal protein L3, conserved site,	XP_002167181.1	RPL3	T2MFZ0	100199663	60S ribosomal protein L3	GO:0000027	ribosomal large subunit assembly			GO:0005622	intracellular anatomical structure
6087_0:001a75	LOC100197944	100197944	protein_coding	13.6127	146	2	23.4104	3.815	60S ribosomal protein L13a-like(LOC100197944)	hmg03010:Ribosome,		XP_002162037.1	LOC100197944		100197944	60S ribosomal protein L13a-like			GO:0003729	mRNA binding	GO:0015934	large ribosomal subunit
6087_0:0005bd	LOC100203600	100203600	protein_coding	13.4508	147	2	25.0653	1.83634	40S ribosomal protein S11-like(LOC100203600)	hmg03010:Ribosome,		XP_002158762.1	LOC100203600		100203600	40S ribosomal protein S11-like					GO:0005622	intracellular anatomical structure
6087_0:003971	LOC100202037	100202037	protein_coding	13.2631	148	2	24.2744	2.25171	antizyme inhibitor 2-like(LOC100202037)	hmg00330:Arginine and proline metabolism,hmg00480:Glutathione metabolism,hmg01100:Metabolic pathways,hmg01130:Biosynthesis of antibiotics,		XP_002157770.1	LOC100202037		100202037	antizyme inhibitor 2-like	GO:0006596|GO:0033387	polyamine biosynthetic process|putrescine biosynthetic process from ornithine	GO:0003824|GO:0004586	catalytic activity|ornithine decarboxylase activity	GO:0005737	cytoplasm
	LOC100210903	100210903	lncRNA	13.2152	149	1	26.4304	0
6087_0:002aaf	LOC100207502	100207502	protein_coding	13.1933	150	2	21.0015	5.38502	nucleoside diphosphate kinase-like(LOC100207502)	hmg00230:Purine metabolism,hmg00240:Pyrimidine metabolism,hmg01100:Metabolic pathways,hmg01130:Biosynthesis of antibiotics,	IPR001564:Nucleoside diphosphate kinase,IPR023005:Nucleoside diphosphate kinase, active site,	NP_001274312.1	NME2	Q967H6	100207502	Nucleoside diphosphate kinase	GO:0006165|GO:0006183|GO:0006241|GO:0006228|GO:0016310	nucleoside diphosphate phosphorylation|GTP biosynthetic process|CTP biosynthetic process|UTP biosynthetic process|phosphorylation	GO:0005524|GO:0000166|GO:0016740|GO:0004550|GO:0016301	ATP binding|nucleotide binding|transferase activity|nucleoside diphosphate kinase activity|kinase activity	GO:0005622	intracellular anatomical structure
6087_0:000a62	LOC100198396	100198396	protein_coding	13.145	151	2	20.0904	6.19956	60S ribosomal protein L44(LOC100198396)	hmg03010:Ribosome,		XP_002161180.1	LOC100198396		100198396	60S ribosomal protein L44					GO:0005622	intracellular anatomical structure
6087_0:000ed9	LOC100214436	100214436	protein_coding	12.9656	152	2	21.0293	4.90191	early growth response protein 1-B-like(LOC100214436)		IPR007087:Zinc finger, C2H2,IPR013087:Zinc finger C2H2-type/integrase DNA-binding domain,IPR015880:Zinc finger, C2H2-like,	XP_002155290.1	EGR1	T2MG97	100214436	Early growth response protein 1			GO:0003676	nucleic acid binding
	LOC105849216	105849216	lncRNA	12.9434	153	2	17.9476	7.93921
6087_0:00073c	LOC100198049	100198049	protein_coding	12.9132	154	2	20.8088	5.01764	60S ribosomal protein L12-like(LOC100198049)	hmg03010:Ribosome,	IPR000911:Ribosomal protein L11,IPR020783:Ribosomal protein L11, C-terminal,IPR020784:Ribosomal protein L11, N-terminal,IPR020785:Ribosomal protein L11, conserved site,	NP_001274705.1	RPL12	Q9NFW1	100198049	60S ribosomal protein L12	GO:0000027	ribosomal large subunit assembly	GO:0019843	rRNA binding
6087_0:000bb2	LOC100199322	100199322	protein_coding	12.8734	155	2	22.1926	3.55432	60S ribosomal protein L17(LOC100199322)	hmg03010:Ribosome,	IPR001063:Ribosomal protein L22/L17,IPR005721:Ribosomal protein L22/L17, eukaryotic/archaeal,IPR018260:Ribosomal protein L22/L17, conserved site,	XP_012553648.1	RPL17	T2MGR0	100199322	60S ribosomal protein L17					GO:0015934|GO:0005622	large ribosomal subunit|intracellular anatomical structure
6087_0:000f8e	LOC100206718	100206718	protein_coding	12.8527	156	2	22.1743	3.53108	60S ribosomal protein L19-like(LOC100206718)	hmg03010:Ribosome,	IPR000196:Ribosomal protein L19/L19e domain,IPR015972:Ribosomal protein L19/L19e, domain 1,IPR015974:Ribosomal protein L19/L19e, domain 3,IPR023638:Ribosomal protein L19/L19e conserved site,IPR027547:Ribosomal protein L19/L19e,	XP_002157298.1	RPL19	T2MEC2	100206718	Ribosomal protein L19					GO:0005622	intracellular anatomical structure
6087_0:0022b0	LOC100207178	100207178	protein_coding	12.7353	157	2	23.4173	2.05339	60S ribosomal protein L8-like(LOC100207178)	hmg03010:Ribosome,	IPR002171:Ribosomal protein L2,IPR008991:Translation protein SH3-like domain,IPR012340:Nucleic acid-binding, OB-fold,IPR014722:Ribosomal protein L2 domain 2,IPR014726:Ribosomal protein L2, domain 3,IPR022666:Ribosomal Proteins L2, RNA binding domain,IPR022669:Ribosomal protein L2, C-terminal,	XP_002158217.1	RPL8	T2MEK4	100207178	60S ribosomal protein L8	GO:0002181	cytoplasmic translation			GO:0005622	intracellular anatomical structure
6087_0:0000b8	LOC100202538	100202538	protein_coding	12.7304	158	2	9.74074	15.72	cullin-3-like(LOC100202538)	hmg04120:Ubiquitin mediated proteolysis,	IPR001373:Cullin, N-terminal,IPR011991:Winged helix-turn-helix DNA-binding domain,IPR016157:Cullin, conserved site,IPR016158:Cullin homology,IPR016159:Cullin repeat-like-containing domain,IPR019559:Cullin protein, neddylation domain,	XP_002155486.3	CUL3	T2MD17	100202538	Cullin-3	GO:0016567	protein ubiquitination	GO:0031625	ubiquitin protein ligase binding	GO:0031461	cullin-RING ubiquitin ligase complex
6087_0:0008cf	LOC100199161	100199161	protein_coding	12.7068	159	2	23.8707	1.54286	40S ribosomal protein S20-like(LOC100199161)	hmg03010:Ribosome,	IPR001848:Ribosomal protein S10,IPR005729:Ribosomal protein S10, eukaryotic/archaeal,IPR027486:Ribosomal protein S10 domain,	XP_004206204.1	RPS20	T2MFA4	100199161	40S ribosomal protein S20	GO:0002181	cytoplasmic translation			GO:0005622|GO:0015935	intracellular anatomical structure|small ribosomal subunit
6087_0:00083a	LOC100197311	100197311	protein_coding	12.6198	160	2	18.9932	6.24641	40S ribosomal protein S23(LOC100197311)	hmg03010:Ribosome,	IPR005680:Ribosomal protein S23, eukaryotic/archaeal,IPR006032:Ribosomal protein S12/S23,IPR012340:Nucleic acid-binding, OB-fold,	XP_004206145.1	RPS23	T2MF85	100197311	40S ribosomal protein S23					GO:0015935|GO:0005622	small ribosomal subunit|intracellular anatomical structure
6087_0:00067d	LOC100211988	100211988	protein_coding	12.5617	161	2	21.2047	3.9187	uncharacterized LOC100211988(LOC100211988)	hmg03010:Ribosome,		XP_002163399.1	LOC100211988		100211988	uncharacterized protein LOC100211988					GO:0005622	intracellular anatomical structure
	LOC105845480	105845480	lncRNA	12.4574	162	2	21.3164	3.59842
6087_0:001446	LOC100200942	100200942	protein_coding	12.2637	163	2	21.7855	2.74196	elongation factor 1-gamma-like(LOC100200942)		IPR001662:Translation elongation factor EF1B, gamma chain, conserved,IPR004045:Glutathione S-transferase, N-terminal,IPR004046:Glutathione S-transferase, C-terminal,IPR010987:Glutathione S-transferase, C-terminal-like,IPR012336:Thioredoxin-like fold,	XP_002154337.2	EEF1G	T2MGF8	100200942	Elongation factor 1-gamma	GO:0006749	glutathione metabolic process	GO:0004364	glutathione transferase activity	GO:0005737|GO:0005634	cytoplasm|nucleus
6087_0:002f1c	LOC100205111	100205111	protein_coding	12.2607	164	2	23.0195	1.50192	polyadenylate-binding protein 4-like(LOC100205111)	hmg03013:RNA transport,hmg03015:mRNA surveillance pathway,hmg03018:RNA degradation,	IPR000504:RNA recognition motif domain,IPR002004:Polyadenylate-binding protein/Hyperplastic disc protein,IPR003954:RNA recognition motif domain, eukaryote,IPR006515:Polyadenylate binding protein, human types 1, 2, 3, 4,IPR012677:Nucleotide-binding, alpha-beta plait,	XP_002156904.1	PABPC1	T2MGJ0	100205111	Polyadenylate-binding protein			GO:0003676	nucleic acid binding	GO:0005737	cytoplasm
6087_0:00253b	LOC100203564	100203564	protein_coding	12.131	165	2	22.408	1.85392	translation elongation factor 2-like(LOC100203564)		IPR000640:Translation elongation factor EFG, V domain,IPR000795:Elongation factor, GTP-binding domain,IPR004161:Translation elongation factor EFTu/EF1A, domain 2,IPR005225:Small GTP-binding protein domain,IPR005517:Translation elongation factor EFG/EF2, domain IV,IPR009000:Translation elongation/initiation factor/Ribosomal, beta-barrel,IPR009022:Elongation factor G, III-V domain,IPR014721:Ribosom…	XP_002157788.1	EEF2	T2MHF1	100203564	Elongation factor 2			GO:0005525|GO:0003924	GTP binding|GTPase activity
	LOC101239626	101239626	lncRNA	12.0892	166	2	19.0909	5.0876
	LOC105849889	105849889	lncRNA	12.068	167	2	22.425	1.71094
6087_0:00038c	LOC100203010	100203010	protein_coding	11.9381	168	2	20.2655	3.6107	calreticulin-like(LOC100203010)	hmg04141:Protein processing in endoplasmic reticulum,hmg04145:Phagosome,	IPR001580:Calreticulin/calnexin,IPR009033:Calreticulin/calnexin, P domain,IPR009169:Calreticulin,IPR013320:Concanavalin A-like lectin/glucanase, subgroup,IPR018124:Calreticulin/calnexin, conserved site,	XP_002161300.1	CALR	T2MFY9	100203010	Calreticulin			GO:0005509|GO:0051082	calcium ion binding|unfolded protein binding	GO:0005783	endoplasmic reticulum
	trnav-cac		tRNA	11.824	169	1	0	23.648
6087_0:0046d8	LOC105849558	105849558	protein_coding	11.7792	170	2	20.9601	2.59836				XP_012565408.1	LOC105849558		105849558	mucin-2-like
6087_0:00281b	LOC100213442	100213442	protein_coding	11.7748	171	2	20.2842	3.26545	40S ribosomal protein S5-like(LOC100213442)	hmg03010:Ribosome,		XP_002167150.2	LOC100213442		100213442	40S ribosomal protein S5-like isoform X1	GO:0000028	ribosomal small subunit assembly	GO:0003729|GO:0019843	mRNA binding|rRNA binding	GO:0015935	small ribosomal subunit
6087_0:002e36	LOC105846454	105846454	protein_coding	11.7377	172	2	10.5084	12.9669	putative cyclin-dependent serine/threonine-protein kinase DDB_G0272797/DDB_G0274007(LOC105846454)		IPR007726:SSXT,	XP_012560673.1	SS18L1	T2MI76	105846454	Calcium-responsive transactivator
6087_0:0027b8	LOC100210716	100210716	protein_coding	11.6513	173	2	18.3173	4.98532				XP_012559373.1	LOC100210716		100210716	gelsolin-like protein 1			GO:0051015|GO:0003779	actin filament binding|actin binding
6087_0:001490	LOC100203078	100203078	protein_coding	11.5876	174	2	18.0308	5.14438	60S ribosomal protein L21-like(LOC100203078)	hmg03010:Ribosome,	IPR001147:Ribosomal protein L21e,IPR008991:Translation protein SH3-like domain,IPR018259:Ribosomal protein L21e, conserved site,	XP_002166786.1	RPL21	T2MFP5	100203078	60S ribosomal protein L21					GO:0005622	intracellular anatomical structure
6087_0:000e69	LOC100212336	100212336	protein_coding	11.5423	175	2	19.9447	3.13981	14-3-3 protein gamma-like(LOC100212336)		IPR000308:14-3-3 protein,IPR023409:14-3-3 protein, conserved site,IPR023410:14-3-3 domain,	NP_001274309.1	LOC100212336	Q8I821	100212336	14-3-3 protein B			GO:0019904|GO:0042802	protein domain specific binding|identical protein binding
6087_0:000f89	LOC100207247	100207247	protein_coding	11.5416	176	2	21.1695	1.91379				XP_002169870.1	LOC100207247		100207247	basic proline-rich protein-like
6087_0:00283b	LOC100207766	100207766	protein_coding	11.4971	177	2	21.5896	1.40465	60S ribosomal protein L22-like(LOC100207766)	hmg03010:Ribosome,	IPR002671:Ribosomal protein L22e,	XP_012559481.1	RPL22	T2MGK9	100207766	60S ribosomal protein L22	GO:0002181	cytoplasmic translation			GO:0005622	intracellular anatomical structure
6087_0:0018c3	LOC100197898	100197898	protein_coding	11.3837	178	2	19.4322	3.33517	40S ribosomal protein S16-like(LOC100197898)	hmg03010:Ribosome,		XP_002159445.1	LOC100197898		100197898	40S ribosomal protein S16-like
6087_0:002d7d	LOC100213922	100213922	protein_coding	11.3068	179	2	16.5704	6.04321				XP_012560521.1	LOC100213922		100213922	tropomyosin-1-like	GO:0007015|GO:0006936	actin filament organization|muscle contraction	GO:0008307|GO:0051015	structural constituent of muscle|actin filament binding	GO:0005862|GO:0005884	muscle thin filament tropomyosin|actin filament
6087_0:00119c	LOC101235897	101235897	protein_coding	11.3003	180	2	21.2875	1.31314				XP_004207000.2	LOC101235897		101235897	heat shock protein HSP 90-alpha-like	GO:0006950	response to stress	GO:0005524|GO:0051082	ATP binding|unfolded protein binding
	LOC105846825	105846825	lncRNA	11.2119	181	1	22.4239	0
6087_0:0003c2	LOC100199472	100199472	protein_coding	11.1957	182	2	18.1124	4.2789	40S ribosomal protein S17-like(LOC100199472)	hmg03010:Ribosome,	IPR001210:Ribosomal protein S17e,IPR018273:Ribosomal protein S17e, conserved site,	XP_012558773.1	RPS17L	T2MGL9	100199472	40S ribosomal protein S17-like	GO:0000028	ribosomal small subunit assembly			GO:0005622	intracellular anatomical structure
6087_0:002f76	LOC100213860	100213860	protein_coding	11.1896	183	2	18.2	4.17912	60S ribosomal protein L7a-like(LOC100213860)	hmg03010:Ribosome,		XP_002163471.1	LOC100213860		100213860	60S ribosomal protein L7a-like	GO:0000470	maturation of LSU-rRNA
6087_0:001178	LOC100209196	100209196	protein_coding	11.1828	184	2	19.9883	2.37727	60S ribosomal protein L35-like(LOC100209196)	hmg03010:Ribosome,		XP_002157600.1	LOC100209196		100209196	60S ribosomal protein L35-like	GO:0000463	maturation of LSU-rRNA from tricistronic rRNA transcript (SSU-rRNA, 5.8S rRNA, LSU-rRNA)	GO:0003729	mRNA binding	GO:0005622	intracellular anatomical structure
6087_0:003d94	LOC100198870	100198870	protein_coding	11.1272	185	2	20.4539	1.80057				XP_002159997.2	LOC100198870		100198870	mucin-5AC-like
6087_0:002edc	LOC100204649	100204649	protein_coding	11.0793	186	2	17.9722	4.18642	40S ribosomal protein S8-like(LOC100204649)	hmg03010:Ribosome,	IPR001047:Ribosomal protein S8e,IPR022309:Ribosomal protein S8e/ribosomal biogenesis NSA2,	XP_002158630.1	RPS8	T2MF59	100204649	40S ribosomal protein S8					GO:0005622	intracellular anatomical structure
6087_0:000038	LOC100209615	100209615	protein_coding	11.0631	187	2	18.0868	4.03949	40S ribosomal protein S27-like(LOC100209615)	hmg03010:Ribosome,		XP_002161016.1	LOC100209615		100209615	40S ribosomal protein S27-like	GO:0000028	ribosomal small subunit assembly	GO:0046872	metal ion binding	GO:0005622	intracellular anatomical structure
6087_0:004263	LOC100206745	100206745	protein_coding	10.9963	188	2	17.9278	4.06475	tubulin alpha-1D chain-like(LOC100206745)	hmg04145:Phagosome,		XP_012564565.1	LOC100206745		100206745	tubulin alpha-1D chain-like	GO:0007010|GO:0007017	cytoskeleton organization|microtubule-based process	GO:0005525|GO:0003924|GO:0000166|GO:0005200	GTP binding|GTPase activity|nucleotide binding|structural constituent of cytoskeleton	GO:0005856|GO:0005737|GO:0005874	cytoskeleton|cytoplasm|microtubule
6087_0:0021c8	LOC105845220	105845220	protein_coding	10.9932	189	2	21.1388	0.847642				XP_012558166.1	LOC105845220		105845220	uncharacterized protein LOC105845220 isoform X1
	LOC105848904	105848904	lncRNA	10.9344	190	2	9.4062	12.4626
6087_0:000d70	LOC100201565	100201565	protein_coding	10.8672	191	2	19.8717	1.86275	40S ribosomal protein S14(LOC100201565)	hmg03010:Ribosome,	IPR001971:Ribosomal protein S11,IPR018102:Ribosomal S11, conserved site,	XP_012554015.1	RPS14	T2MER0	100201565	40S ribosomal protein S14	GO:0000028	ribosomal small subunit assembly	GO:0070181|GO:0048027	small ribosomal subunit rRNA binding|mRNA 5'-UTR binding
6087_0:002da6	LOC100205688	100205688	protein_coding	10.6335	192	2	18.5401	2.7269				XP_002156589.1	LOC100205688		100205688	transcription factor BTF3 homolog 4-like	GO:0001701	in utero embryonic development			GO:0005829	cytosol
6087_0:0009ac	cndmc1		protein_coding	10.5694	193	2	14.9791	6.15977				NP_001274726.1	CnDmc1	Q9GRA3	100192240	DMC1 homologue CnDMC1	GO:0006281|GO:0006312|GO:0042148|GO:0070192|GO:0000730|GO:0010212|GO:1990426	DNA repair|mitotic recombination|strand invasion|chromosome organization involved in meiotic cell cycle|DNA recombinase assembly|response to ionizing radiation|mitotic recombination-dependent replication fork processing	GO:0000166|GO:0005524|GO:0003690|GO:0000150|GO:0000400	nucleotide binding|ATP binding|double-stranded DNA binding|recombinase activity|four-way junction DNA binding	GO:0000794|GO:0005634|GO:0005654	condensed nuclear chromosome|nucleus|nucleoplasm
	LOC105845577	105845577	lncRNA	10.5503	194	2	4.643	16.4575
6087_0:0032a3	LOC100203975	100203975	protein_coding	10.418	195	2	14.9529	5.88304	annexin-B12(LOC100203975)		IPR001464:Annexin,IPR018252:Annexin repeat, conserved site,IPR018502:Annexin repeat,	XP_002155286.3	ANXB12	P26256	100203975	Annexin-B12			GO:0005544|GO:0005509	calcium-dependent phospholipid binding|calcium ion binding
6087_0:004388	LOC105849045	105849045	protein_coding	10.2672	196	2	15.0995	5.4348				XP_012564781.1	LOC105849045		105849045	uncharacterized protein LOC105849045
6087_0:004e32	COX3		protein_coding	10.0066	197	2	19.0259	0.987344				YP_002221529.1	COX3	B4F7M4	6904224	Cytochrome c oxidase subunit 3	GO:0022904|GO:0008535	respiratory electron transport chain|respiratory chain complex IV assembly	GO:0004129|GO:0015002	cytochrome-c oxidase activity|heme-copper terminal oxidase activity	GO:0005739|GO:0016021|GO:0016020	mitochondrion|integral component of membrane|membrane
6087_0:002006	LOC100204377	100204377	protein_coding	9.92148	198	2	17.5584	2.28453	pulmonary surfactant-associated protein D-like(LOC100204377)		IPR008160:Collagen triple helix repeat,	NP_001267805.1	LOC100204377	G7H7V8	100204377	Minicollagen 5
6087_0:0000a7	LOC100197367	100197367	protein_coding	9.90753	199	2	18.3443	1.47076	guanine nucleotide-binding protein subunit beta-like protein-like(LOC100197367)		IPR001680:WD40 repeat,IPR015943:WD40/YVTN repeat-like-containing domain,IPR017986:WD40-repeat-containing domain,IPR019775:WD40 repeat, conserved site,IPR020472:G-protein beta WD-40 repeat,	NP_001274728.1	GNB2L1;RACK1	Q25189	100197367	Guanine nucleotide-binding protein subunit beta-like protein					GO:0005737	cytoplasm
	trnap-cgg		tRNA	9.84324	200	2	7.52428	12.1622
6087_0:0048e5	LOC100204269	100204269	protein_coding	9.81109	201	2	16.0284	3.59377	60S ribosomal protein L15-like(LOC100204269)	hmg03010:Ribosome,		XP_002162844.1	LOC100204269		100204269	60S ribosomal protein L15-like	GO:0002181	cytoplasmic translation			GO:0005622	intracellular anatomical structure
6087_0:000a8b	LOC100199391	100199391	protein_coding	9.7847	202	2	17.7782	1.7912				XP_002157544.1	LOC100199391		100199391	uncharacterized protein LOC100199391
	LOC100197812	100197812	lncRNA	9.71907	203	2	18.2584	1.17973
6087_0:00437b	LOC100199799	100199799	protein_coding	9.65882	204	2	16.2307	3.08694	40S ribosomal protein S3-like(LOC100199799)	hmg03010:Ribosome,	IPR001351:Ribosomal protein S3, C-terminal,IPR004044:K Homology domain, type 2,IPR005703:Ribosomal protein S3, eukaryotic/archaeal,IPR009019:K homology domain, prokaryotic type,IPR015946:K homology domain-like, alpha/beta,IPR018280:Ribosomal protein S3, conserved site,	XP_002162713.1	RPS3	T2MGJ4	100199799	40S ribosomal protein S3	GO:0006281|GO:0002181	DNA repair|cytoplasmic translation	GO:0003906|GO:0003684	DNA-(apurinic or apyrimidinic site) endonuclease activity|damaged DNA binding	GO:0015935|GO:0005634	small ribosomal subunit|nucleus
	trnav-uac		tRNA	9.5547	205	2	7.2854	11.824
6087_0:000c6e	LOC100212701	100212701	protein_coding	9.44304	206	2	14.5088	4.37727				XP_012553809.1	LOC100212701		100212701	annexin A4-like			GO:0005544|GO:0005509	calcium-dependent phospholipid binding|calcium ion binding
6087_0:0027c3	LOC105845791	105845791	protein_coding	9.41922	207	2	18.1022	0.736242				XP_012559385.1	LOC105845791		105845791	late histone H2B.L4-like	GO:0006334	nucleosome assembly	GO:0046982	protein heterodimerization activity	GO:0005634|GO:0005694	nucleus|chromosome
	LOC105847920	105847920	lncRNA	9.336	208	1	18.672	0
6087_0:00437c	LOC100204815	100204815	protein_coding	9.30555	209	2	14.9944	3.6167	60S ribosomal protein L10a-like(LOC100204815)	hmg03010:Ribosome,		XP_002165854.1	LOC100204815		100204815	60S ribosomal protein L10a-like					GO:0015934	large ribosomal subunit
	COX2		protein_coding	9.2961	210	1	18.5922	0
	LOC105843896	105843896	lncRNA	8.79515	211	1	17.5903	0
	LOC100214617	100214617	misc_RNA	8.7341	212	2	16.7198	0.748395
6087_0:0025a9	LOC100211415	100211415	protein_coding	8.60873	213	2	15.4551	1.76237				XP_002166436.2	LOC100211415		100211415	histidine-rich glycoprotein-like
6087_0:00034c	LOC100201163	100201163	protein_coding	8.52015	214	2	14.4778	2.5625	60S ribosomal protein L14-like(LOC100201163)	hmg03010:Ribosome,	IPR002784:Ribosomal protein L14,IPR008991:Translation protein SH3-like domain,IPR014722:Ribosomal protein L2 domain 2,	XP_002163629.1	RPL14	T2MFS3	100201163	60S ribosomal protein L14	GO:0042273	ribosomal large subunit biogenesis			GO:0005622	intracellular anatomical structure
6087_0:002525	LOC100205017	100205017	protein_coding	8.49803	215	2	14.4119	2.58415	elongation factor 1-beta-like(LOC100205017)		IPR001326:Translation elongation factor EF1B, beta/delta chains, conserved site,IPR010987:Glutathione S-transferase, C-terminal-like,IPR014038:Translation elongation factor EF1B, beta/delta subunit, guanine nucleotide exchange,IPR014717:Translation elongation factor EF1B/ribosomal protein S6,IPR018940:Elongation factor 1 beta central acidic region, eukaryote,	XP_002162369.1	EEF1B2	T2MH09	100205017	Elongation factor 1-beta					GO:0005853	eukaryotic translation elongation factor 1 complex
6087_0:003921	LOC100213130	100213130	protein_coding	8.48972	216	2	14.3428	2.63665				XP_012562829.1	LOC100213130		100213130	KS1 protein
6087_0:001d37	LOC105844776	105844776	protein_coding	8.45829	217	2	15.8091	1.10747				XP_012557225.1	LOC105844776		105844776	heat shock 70 kDa protein cognate 1-like
6087_0:00323b	LOC100204550	100204550	protein_coding	8.45337	218	2	14.1412	2.76554				XP_004210264.1	LOC100204550		100204550	peptidyl-prolyl cis-trans isomerase-like	GO:0000413	protein peptidyl-prolyl isomerization	GO:0016853	isomerase activity
6087_0:004618	LOC100209087	100209087	protein_coding	8.35924	219	2	14.5734	2.14508	nascent polypeptide-associated complex subunit alpha-like(LOC100209087)		IPR002715:Nascent polypeptide-associated complex NAC domain,IPR016641:Nascent polypeptide-associated complex subunit alpha,	XP_004212337.1	NACA	T2MD10	100209087	Nascent polypeptide-associated complex subunit alpha					GO:0005854	nascent polypeptide-associated complex
6087_0:003816	LOC100200771	100200771	protein_coding	8.23686	220	2	15.4878	0.985913				XP_002165574.2	LOC100200771		100200771	eukaryotic translation initiation factor 5A-like	GO:0006452|GO:0045901|GO:0045905	translational frameshifting|positive regulation of translational elongation|positive regulation of translational termination
6087_0:002138	LOC100214352	100214352	protein_coding	8.15791	221	2	14.0655	2.25032	60S ribosomal protein L7a-like(LOC100214352)	hmg03010:Ribosome,		XP_002154604.1	LOC100214352		100214352	60S ribosomal protein L7a-like	GO:0000470	maturation of LSU-rRNA
	LOC105850409	105850409	lncRNA	8.1212	222	1	16.2424	0
6087_0:00110d	LOC100198755	100198755	protein_coding	8.11857	223	2	15.1501	1.08703	nucleosome assembly protein 1-like 1(LOC100198755)		IPR002164:Nucleosome assembly protein (NAP),	XP_002156793.1	NAP1L1	T2MFG3	100198755	Nucleosome assembly protein 1-like 1	GO:0006334	nucleosome assembly			GO:0005634	nucleus
6087_0:003699	LOC100210883	100210883	protein_coding	7.86777	224	2	7.06472	8.67083				XP_002153782.2	LOC100210883		100210883	zinc finger protein ZIC 4-like			GO:0003676	nucleic acid binding
6087_0:001e5a	LOC100207688	100207688	protein_coding	7.86687	225	2	12.4941	3.23965				XP_012557462.1	LOC100207688		100207688	uncharacterized protein LOC100207688 isoform X2
6087_0:001756	LOC100200169	100200169	protein_coding	7.75364	226	2	12.5818	2.92547				XP_002165211.1	LOC100200169		100200169	tropomyosin-1-like
6087_0:0021bc	LOC100205873	100205873	protein_coding	7.69296	227	2	13.1137	2.27221				XP_002162760.3	LOC100205873		100205873	N-acyl-phosphatidylethanolamine-hydrolyzing phospholipase D-like	GO:0070291	N-acylethanolamine metabolic process	GO:0070290|GO:0008270|GO:0042802	N-acylphosphatidylethanolamine-specific phospholipase D activity|zinc ion binding|identical protein binding	GO:0005829	cytosol
	LOC105845295	105845295	lncRNA	7.65565	228	1	15.3113	0
	LOC105846855	105846855	lncRNA	7.65515	229	1	15.3103	0
6087_0:00481f	LOC105849745	105849745	protein_coding	7.64998	230	2	5.75966	9.54029				XP_012565632.1	LOC105849745		105849745	uncharacterized protein LOC105849745
6087_0:001b29	LOC100206725	100206725	protein_coding	7.40848	231	2	13.5723	1.24465	cathepsin L1-like(LOC100206725)	hmg04142:Lysosome,hmg04145:Phagosome,	IPR000169:Cysteine peptidase, cysteine active site,IPR000668:Peptidase C1A, papain C-terminal,IPR013128:Peptidase C1A, papain,IPR013201:Proteinase inhibitor I29, cathepsin propeptide,IPR025660:Cysteine peptidase, histidine active site,IPR025661:Cysteine peptidase, asparagine active site,	XP_002169904.2	CTSL1	T2MH98	100206725	Cathepsin L1	GO:0006508|GO:0051603	proteolysis|proteolysis involved in cellular protein catabolic process	GO:0004197	cysteine-type endopeptidase activity	GO:0005764|GO:0005615	lysosome|extracellular space
	LOC105846503	105846503	lncRNA	7.3558	232	1	14.7116	0
	LOC105849123	105849123	lncRNA	7.35425	233	1	14.7085	0
6087_0:001814	LOC100197511	100197511	protein_coding	7.34932	234	2	10.1487	4.54994	ATP synthase subunit alpha, mitochondrial(LOC100197511)	hmg00190:Oxidative phosphorylation,hmg01100:Metabolic pathways,	IPR000194:ATPase, F1/V1/A1 complex, alpha/beta subunit, nucleotide-binding domain,IPR000793:ATPase, F1/V1/A1 complex, alpha/beta subunit, C-terminal,IPR004100:ATPase, alpha/beta subunit, N-terminal,IPR005294:ATPase, F1 complex, alpha subunit,IPR020003:ATPase, alpha/beta subunit, nucleotide-binding domain, active site,IPR023366:ATPase, F1/A1 complex, alpha subunit, N-terminal,IPR027417:P-loop cont…	XP_002163780.1	ATP5A1	T2MGZ6	100197511	ATP synthase subunit alpha	GO:0015986|GO:0046034|GO:0015992|GO:0006811|GO:0099132	ATP synthesis coupled proton transport|ATP metabolic process|NA|ion transport	GO:0005524|GO:0046933|GO:0032559|GO:0000166	ATP binding|proton-transporting ATP synthase activity, rotational mechanism|adenyl ribonucleotide binding|nucleotide binding	GO:0045261	proton-transporting ATP synthase complex, catalytic core F(1)
6087_0:002e09	LOC100213236	100213236	protein_coding	7.34636	235	2	6.10888	8.58384				XP_012560641.1	LOC100213236		100213236	uncharacterized protein LOC100213236			GO:0022829	wide pore channel activity	GO:0016021|GO:0016020	integral component of membrane|membrane
6087_0:0029d8	LOC100210039	100210039	protein_coding	7.20991	236	2	12.1169	2.30293				XP_002159416.2	LOC100210039		100210039	elongation of very long chain fatty acids protein AAEL008004-like	GO:0006631|GO:0006629|GO:0019367|GO:0034626|GO:0042761|GO:0030148|GO:0034625	fatty acid metabolic process|lipid metabolic process|fatty acid elongation, saturated fatty acid|fatty acid elongation, polyunsaturated fatty acid|very long-chain fatty acid biosynthetic process|sphingolipid biosynthetic process|fatty acid elongation, monounsaturated fatty acid	GO:0102338|GO:0102337|GO:0102336|GO:0102756|GO:0016740|GO:0009922	3-oxo-lignoceronyl-CoA synthase activity|3-oxo-cerotoyl-CoA synthase activity|3-oxo-arachidoyl-CoA synthase activity|very-long-chain 3-ketoacyl-CoA synthase activity|transferase activity|fatty acid elongase activity	GO:0016021|GO:0016020|GO:0005783|GO:0030176	integral component of membrane|membrane|endoplasmic reticulum|integral component of endoplasmic reticulum membrane
6087_0:002063	LOC100198821	100198821	protein_coding	7.10322	237	2	12.6125	1.59394	cathepsin L1-like(LOC100198821)		IPR000169:Cysteine peptidase, cysteine active site,IPR000668:Peptidase C1A, papain C-terminal,IPR013128:Peptidase C1A, papain,IPR013201:Proteinase inhibitor I29, cathepsin propeptide,IPR025660:Cysteine peptidase, histidine active site,IPR025661:Cysteine peptidase, asparagine active site,	XP_012557875.1	LOC100198821	Q86GJ2	100198821	Cathepsin L	GO:0006508|GO:0051603	proteolysis|proteolysis involved in cellular protein catabolic process	GO:0004197	cysteine-type endopeptidase activity	GO:0005764|GO:0005615	lysosome|extracellular space
6087_0:0017df	LOC100211221	100211221	protein_coding	7.09778	238	2	13.1225	1.07306	eukaryotic initiation factor 4A-I-like(LOC100211221)	hmg03013:RNA transport,	IPR000629:RNA helicase, ATP-dependent, DEAD-box, conserved site,IPR001650:Helicase, C-terminal,IPR011545:DNA/RNA helicase, DEAD/DEAH box type, N-terminal,IPR014001:Helicase, superfamily 1/2, ATP-binding domain,IPR014014:RNA helicase, DEAD-box type, Q motif,IPR027417:P-loop containing nucleoside triphosphate hydrolase,	XP_002163229.1	EIF4A2	T2MDB0	100211221	Eukaryotic initiation factor 4A-II	GO:0010501|GO:0010468	RNA secondary structure unwinding|regulation of gene expression	GO:0004004|GO:0004386|GO:0016787|GO:0003676|GO:0000166|GO:0005524	NA|helicase activity|hydrolase activity|nucleic acid binding|nucleotide binding|ATP binding	GO:0005737|GO:0005730	cytoplasm|nucleolus
6087_0:001683	LOC105844163	105844163	protein_coding	7.07964	239	2	13.5539	0.60538				XP_012555902.1	LOC105844163		105844163	uncharacterized protein LOC105844163	GO:0006869	lipid transport	GO:0005319	lipid transporter activity
	LOC105849715	105849715	lncRNA	7.05975	240	1	14.1195	0
6087_0:00052d	LOC100205984	100205984	protein_coding	6.94297	241	2	10.5296	3.35634	40S ribosomal protein S13(LOC100205984)	hmg03010:Ribosome,		XP_002166294.1	LOC100205984		100205984	40S ribosomal protein S13			GO:0070181	small ribosomal subunit rRNA binding	GO:0005622|GO:0005730	intracellular anatomical structure|nucleolus
6087_0:000d7f	LOC100201456	100201456	protein_coding	6.91652	242	2	10.7822	3.05083				XP_012554031.1	LOC100201456		100201456	uncharacterized protein LOC100201456
6087_0:002f25	LOC100207631	100207631	protein_coding	6.89977	243	2	12.9974	0.802131				XP_012560866.1	LOC100207631		100207631	myosin-10-like	GO:0007018|GO:0030048	microtubule-based movement|actin filament-based movement	GO:0003774|GO:0008017|GO:0003777|GO:0005524|GO:0051015|GO:0000166|GO:0003779|GO:0000146|GO:0030898	motor activity|microtubule binding|microtubule motor activity|ATP binding|actin filament binding|nucleotide binding|actin binding|microfilament motor activity|actin-dependent ATPase activity	GO:0016459|GO:0005903|GO:0001725|GO:0005737	myosin complex|brush border|stress fiber|cytoplasm
6087_0:0003a5	LOC100199066	100199066	protein_coding	6.87509	244	2	10.8799	2.87027	elongation factor 1-delta-like(LOC100199066)		IPR001326:Translation elongation factor EF1B, beta/delta chains, conserved site,IPR014038:Translation elongation factor EF1B, beta/delta subunit, guanine nucleotide exchange,IPR014717:Translation elongation factor EF1B/ribosomal protein S6,IPR018940:Elongation factor 1 beta central acidic region, eukaryote,	XP_002156180.1	EEF1D	T2MGB7	100199066	Elongation factor 1-delta					GO:0005853	eukaryotic translation elongation factor 1 complex
	LOC101236986	101236986	lncRNA	6.74299	245	2	10.6426	2.84338
6087_0:003303	LOC100200694	100200694	protein_coding	6.65014	246	2	8.94684	4.35344				XP_012561603.1	LOC100200694		100200694	four and a half LIM domains protein 2-like			GO:0046872	metal ion binding
	LOC105850817	105850817	lncRNA	6.55335	247	1	13.1067	0
6087_0:0033ad	LOC100205372	100205372	protein_coding	6.50321	248	2	4.60967	8.39676	protein FAM46C-like(LOC100205372)		IPR012937:Domain of unknown function DUF1693,	XP_004210423.1	FAM46A	T2M7T3	100205372	Protein FAM46A			GO:0016740|GO:0016779	transferase activity|nucleotidyltransferase activity
6087_0:003972	LOC100208497	100208497	protein_coding	6.47645	249	2	11.3908	1.56209	40S ribosomal protein S24-like(LOC100208497)	hmg03010:Ribosome,		XP_012562888.1	LOC100208497		100208497	40S ribosomal protein S24-like					GO:0005622	intracellular anatomical structure
6087_0:004e30	ATP6		protein_coding	6.42606	250	1	12.4773	0.374826				YP_002221528.1	ATP6	B4F7M3	6904225	ATP synthase subunit a	GO:0015986	ATP synthesis coupled proton transport	GO:0015078	proton transmembrane transporter activity	GO:0016020|GO:0005739|GO:0045263|GO:0005743|GO:0016021	membrane|mitochondrion|proton-transporting ATP synthase complex, coupling factor F(o)|mitochondrial inner membrane|integral component of membrane
6087_0:00001e	LOC100209044	100209044	protein_coding	6.32081	251	2	11.1593	1.48232				XP_012553531.1	LOC100209044		100209044	cysteine and glycine-rich protein 1-like			GO:0046872	metal ion binding
6087_0:0029da	LOC100209402	100209402	protein_coding	6.30715	252	2	11.2359	1.3784	major vault protein-like(LOC100209402)		IPR000048:IQ motif, EF-hand binding site,IPR002499:Major vault protein, N-terminal,IPR021870:Shoulder domain,	XP_012559802.1	MVP	T2MD44	100209402	Major vault protein	GO:0023051|GO:0038127|GO:0061099|GO:0023057|GO:0031953	regulation of signaling|ERBB signaling pathway|negative regulation of protein tyrosine kinase activity|negative regulation of signaling|negative regulation of protein autophosphorylation	GO:0019901|GO:0019903|GO:0042802	protein kinase binding|protein phosphatase binding|identical protein binding	GO:0005737|GO:0005634|GO:0005856|GO:0005829|GO:0048471	cytoplasm|nucleus|cytoskeleton|cytosol|perinuclear region of cytoplasm
6087_0:00180c	LOC100207044	100207044	protein_coding	6.30531	253	2	10.656	1.95462				XP_002167561.1	LOC100207044		100207044	voltage-dependent anion-selective channel protein 2-like	GO:0098656|GO:0055085|GO:0015698	anion transmembrane transport|transmembrane transport|inorganic anion transport			GO:0005741|GO:0005739	mitochondrial outer membrane|mitochondrion
6087_0:000adf	LOC100212346	100212346	protein_coding	6.29204	254	2	8.61012	3.97396	23 kDa integral membrane protein-like(LOC100212346)	hmg04142:Lysosome,		XP_002161461.1	LOC100212346		100212346	23 kDa integral membrane protein-like	GO:0007166	cell surface receptor signaling pathway			GO:0016021|GO:0005887	integral component of membrane|integral component of plasma membrane
6087_0:004c40	LOC105850440	105850440	protein_coding	6.26303	255	1	12.1818	0.344253				XP_012566368.1	LOC105850440		105850440	bypass of stop codon protein 1-like
6087_0:001f39	LOC101240985	101240985	protein_coding	6.25599	256	2	11.8344	0.67758				XP_004208347.2	LOC101240985		101240985	uncharacterized protein LOC101240985	GO:0030198|GO:0001525	extracellular matrix organization|angiogenesis	GO:0050840|GO:0005518	extracellular matrix binding|collagen binding	GO:0005578|GO:0005615|GO:0005802|GO:0005576	NA|extracellular space|trans-Golgi network|extracellular region
6087_0:00099a	LOC105850954	105850954	protein_coding	6.24199	257	2	11.7901	0.693884				XP_012566977.1	LOC105850954		105850954	uncharacterized protein LOC105850954			GO:0003676|GO:0008270	nucleic acid binding|zinc ion binding
6087_0:002a4a	LOC105846074	105846074	protein_coding	6.23581	258	2	9.84992	2.6217				XP_012559898.1	LOC105846074		105846074	uncharacterized protein LOC105846074
6087_0:0001b1	LOC100201371	100201371	protein_coding	6.20072	259	2	4.75262	7.64882				XP_012554591.1	LOC100201371		100201371	cGMP-dependent protein kinase 1	GO:0006468	protein phosphorylation	GO:0004692|GO:0005524|GO:0030553	cGMP-dependent protein kinase activity|ATP binding|cGMP binding
	LOC101239327	101239327	lncRNA	6.15243	260	2	9.86278	2.44208
6087_0:003377	LOC100198991	100198991	protein_coding	6.1331	261	1	12.2662	0				XP_012561702.1	LOC100198991		100198991	heterogeneous nuclear ribonucleoprotein A2 homolog 2-like			GO:0003676	nucleic acid binding
	LOC105848906	105848906	lncRNA	6.12036	262	2	8.41111	3.82961
6087_0:003cde	LOC100212469	100212469	protein_coding	6.10847	263	2	9.74827	2.46867	soma ferritin-like(LOC100212469)		IPR001519:Ferritin,IPR008331:Ferritin/DPS protein domain,IPR009040:Ferritin- like diiron domain,IPR009078:Ferritin-like superfamily,IPR012347:Ferritin-related,IPR014034:Ferritin, conserved site,	XP_002160295.1	FTH1	T2MGZ7	100212469	Ferritin	GO:0006879|GO:0006880	cellular iron ion homeostasis|intracellular sequestering of iron ion	GO:0004322|GO:0046872|GO:0008199|GO:0005506	ferroxidase activity|metal ion binding|ferric iron binding|iron ion binding	GO:0005623|GO:0005737	NA|cytoplasm
6087_0:003a2d	LOC100200770	100200770	protein_coding	6.08556	264	2	9.96979	2.20133	ADP-ribosylation factor 1-like 2(LOC100200770)	hmg04144:Endocytosis,	IPR005225:Small GTP-binding protein domain,IPR006689:Small GTPase superfamily, ARF/SAR type,IPR024156:Small GTPase superfamily, ARF type,IPR027417:P-loop containing nucleoside triphosphate hydrolase,	XP_002162887.1	ARF1	T2MEB5	100200770	ADP-ribosylation factor 1	GO:0007264	small GTPase mediated signal transduction	GO:0000166|GO:0005525	nucleotide binding|GTP binding	GO:0005622	intracellular anatomical structure
	trnat-cgu		tRNA	6.0811	265	1	0	12.1622
6087_0:004203	LOC100207428	100207428	protein_coding	6.06817	266	2	11.0324	1.10393	polypyrimidine tract-binding protein 1-like(LOC100207428)		IPR000504:RNA recognition motif domain,IPR006536:HnRNP-L/PTB/hephaestus splicing factor,IPR012677:Nucleotide-binding, alpha-beta plait,	XP_002156158.1	ROD1	T2MI48	100207428	Regulator of differentiation 1	GO:0006397|GO:0033119	mRNA processing|negative regulation of RNA splicing	GO:0003676	nucleic acid binding	GO:0005634	nucleus
6087_0:002f94	LOC100214200	100214200	protein_coding	6.03791	267	2	10.84	1.23581	60S ribosomal protein L35a-like(LOC100214200)	hmg03010:Ribosome,	IPR001780:Ribosomal protein L35A,IPR009000:Translation elongation/initiation factor/Ribosomal, beta-barrel,	XP_002162566.1	LOC100214200	A0S5U4	100214200	Ribosomal protein L35A	GO:0002181|GO:0042273	cytoplasmic translation|ribosomal large subunit biogenesis			GO:0005622	intracellular anatomical structure
	LOC100207929	100207929	lncRNA	6.02711	268	2	8.60631	3.44791
	LOC105844346	105844346	lncRNA	5.9633	269	1	11.9266	0
6087_0:000bb6	LOC100202907	100202907	protein_coding	5.93033	270	2	8.02813	3.83253	receptor expression-enhancing protein 5-like(LOC100202907)		IPR004345:TB2/DP1/HVA22-related protein,	XP_012553647.1	REEP5	T2ME89	100202907	Receptor expression-enhancing protein					GO:0016021|GO:0016020	integral component of membrane|membrane
	trnat-ugu		tRNA	5.912	271	1	0	11.824
	LOC105848685	105848685	lncRNA	5.91185	272	1	11.8237	0
6087_0:00138b	LOC100198247	100198247	protein_coding	5.89845	273	2	9.80486	1.99204	probable protein disulfide-isomerase A6(LOC100198247)	hmg04141:Protein processing in endoplasmic reticulum,		XP_012555304.1	LOC100198247		100198247	probable protein disulfide-isomerase A6	GO:0034976	response to endoplasmic reticulum stress	GO:0016853	isomerase activity	GO:0005783	endoplasmic reticulum
6087_0:002a5c	LOC100207226	100207226	protein_coding	5.89257	274	2	10.1199	1.66523				XP_004209432.1	LOC100207226		100207226	gamma-interferon-inducible lysosomal thiol reductase-like					GO:0016021|GO:0016020	integral component of membrane|membrane
6087_0:004662	LOC100209382	100209382	protein_coding	5.86483	275	1	11.5283	0.201361				XP_002161108.1	LOC100209382		100209382	uncharacterized protein LOC100209382
6087_0:002567	LOC105845565	105845565	protein_coding	5.81726	276	2	10.5237	1.11083				XP_012558917.1	LOC105845565		105845565	uncharacterized protein LOC105845565	GO:0006030	chitin metabolic process	GO:0008061	chitin binding	GO:0005576	extracellular region
6087_0:00273a	LOC100211659	100211659	protein_coding	5.81304	277	2	9.4105	2.21559	lysosome-associated membrane glycoprotein 1-like(LOC100211659)	hmg04142:Lysosome,hmg04145:Phagosome,		XP_002158873.2	LOC100211659		100211659	lysosome-associated membrane glycoprotein 1-like	GO:0050821	protein stabilization	GO:0019899|GO:0019904	enzyme binding|protein domain specific binding	GO:0044754|GO:0005765|GO:0005770|GO:0016021|GO:0005764|GO:0016020	autolysosome|lysosomal membrane|late endosome|integral component of membrane|lysosome|membrane
6087_0:001294	LOC100215712	100215712	protein_coding	5.8038	278	2	10.8258	0.781803				XP_012555099.1	LOC100215712		100215712	nucleoplasmin-like protein ANO39
6087_0:001199	LOC100199389	100199389	protein_coding	5.79042	279	2	11.1101	0.470742	heat shock protein HSP 90-alpha-like(LOC100199389)	hmg04141:Protein processing in endoplasmic reticulum,		XP_002165028.1	LOC100199389		100199389	heat shock protein HSP 90-alpha-like	GO:0006950	response to stress	GO:0005524|GO:0051082	ATP binding|unfolded protein binding
	LOC105846596	105846596	lncRNA	5.7259	280	1	11.4518	0
6087_0:002b72	LOC100202812	100202812	protein_coding	5.72302	281	2	10.6024	0.843655				XP_012560101.1	LOC100202812		100202812	nucleolin 2-like isoform X1			GO:0003676	nucleic acid binding
6087_0:00010d	LOC101235115	101235115	protein_coding	5.721	282	2	8.91138	2.53062				XP_012567137.1	LOC101235115		101235115	uncharacterized protein LOC101235115
6087_0:002455	LOC100214906	100214906	protein_coding	5.7196	283	2	8.6146	2.82461	ubiquitin-conjugating enzyme E2 L3-like(LOC100214906)	hmg04120:Ubiquitin mediated proteolysis,		XP_002158750.1	LOC100214906		100214906	ubiquitin-conjugating enzyme E2 L3-like			GO:0000166|GO:0005524	nucleotide binding|ATP binding
6087_0:00081f	LOC100201285	100201285	protein_coding	5.68349	284	2	9.05705	2.30992	dnaJ homolog subfamily A member 1-like(LOC100201285)	hmg04141:Protein processing in endoplasmic reticulum,	IPR001305:Heat shock protein DnaJ, cysteine-rich domain,IPR001623:DnaJ domain,IPR002939:Chaperone DnaJ, C-terminal,IPR008971:HSP40/DnaJ peptide-binding,IPR012724:Chaperone DnaJ,IPR018253:DnaJ domain, conserved site,	XP_002165159.1	DNAJA1	T2MG96	100201285	DnaJ homolog subfamily A member 1			GO:0031072|GO:0046872|GO:0051082|GO:0005524	heat shock protein binding|metal ion binding|unfolded protein binding|ATP binding	GO:0005829	cytosol
6087_0:0014e8	LOC100210153	100210153	protein_coding	5.57739	285	2	9.19965	1.95513				XP_012555576.1	LOC100210153		100210153	uncharacterized protein LOC100210153
6087_0:000dfa	LOC100213598	100213598	protein_coding	5.51552	286	2	10.1082	0.922841	ATP-dependent RNA helicase dbp2-like(LOC100213598)		IPR000629:RNA helicase, ATP-dependent, DEAD-box, conserved site,IPR001650:Helicase, C-terminal,IPR011545:DNA/RNA helicase, DEAD/DEAH box type, N-terminal,IPR014001:Helicase, superfamily 1/2, ATP-binding domain,IPR014014:RNA helicase, DEAD-box type, Q motif,IPR027417:P-loop containing nucleoside triphosphate hydrolase,	XP_002164829.1	DDX17	T2M8E4	100213598	Probable ATP-dependent RNA helicase DDX17	GO:0010501	RNA secondary structure unwinding	GO:0003676|GO:0005524|GO:0004004|GO:0004386|GO:0000166|GO:0016787	nucleic acid binding|ATP binding|NA|helicase activity|nucleotide binding|hydrolase activity	GO:0005730|GO:0005737	nucleolus|cytoplasm
	LOC105846955	105846955	lncRNA	5.5052	287	1	11.0104	0
6087_0:00485a	LOC105849787	105849787	protein_coding	5.45855	288	1	10.9171	0				XP_012565680.1	LOC105849787		105849787	uncharacterized protein LOC105849787 isoform X2	GO:0006281|GO:0000723|GO:0032508|GO:0006310	DNA repair|telomere maintenance|DNA duplex unwinding|DNA recombination	GO:0005524|GO:0016787|GO:0004386|GO:0000166	ATP binding|hydrolase activity|helicase activity|nucleotide binding
	LOC101236224	101236224	lncRNA	5.44209	289	2	9.01288	1.8713
	LOC105849695	105849695	lncRNA	5.4284	290	1	10.8568	0
6087_0:000320	LOC100212003	100212003	protein_coding	5.4096	291	2	9.73996	1.07923				XP_012557394.1	LOC100212003		100212003	histone H2A-like			GO:0046982	protein heterodimerization activity	GO:0005694|GO:0005634|GO:0000790	chromosome|nucleus|NA
	mir3008		miRNA	5.39745	292	1	10.7949	0
6087_0:0002ad	LOC100198816	100198816	protein_coding	5.35742	293	2	7.79872	2.91612	actin-related protein 2/3 complex subunit 1A-like(LOC100198816)	hmg04144:Endocytosis,		XP_002157059.1	LOC100198816		100198816	actin-related protein 2/3 complex subunit 1A-like	GO:0030833|GO:0034314	regulation of actin filament polymerization|Arp2/3 complex-mediated actin nucleation	GO:0003779|GO:0051015	actin binding|actin filament binding	GO:0005885|GO:0015629|GO:0005856|GO:0005737	Arp2/3 protein complex|actin cytoskeleton|cytoskeleton|cytoplasm
6087_0:00163c	LOC100212542	100212542	protein_coding	5.3328	294	2	10.2296	0.435991				XP_002162674.2	LOC100212542		100212542	circumsporozoite protein-like isoform X1			GO:0008270|GO:0003676	zinc ion binding|nucleic acid binding
6087_0:001b3a	LOC100197829	100197829	protein_coding	5.33223	295	2	9.16305	1.50142				XP_012556825.1	LOC100197829		100197829	uncharacterized protein LOC100197829	GO:0007015|GO:0007399	actin filament organization|nervous system development	GO:0003785	actin monomer binding	GO:0005829	cytosol
6087_0:003fd2	LOC101239803	101239803	protein_coding	5.29124	296	2	8.44994	2.13254				XP_012564100.1	LOC101239803		101239803	protein slowmo homolog 1-like					GO:0005739	mitochondrion
6087_0:002700	LOC100206874	100206874	protein_coding	5.26654	297	2	9.56719	0.965884				XP_002164309.1	LOC100206874		100206874	myophilin-like
6087_0:002168	LOC100211509	100211509	protein_coding	5.25465	298	2	7.20103	3.30827				XP_002154165.1	LOC100211509		100211509	myosin-2 essential light chain-like			GO:0005509	calcium ion binding
6087_0:00332e	LOC100204430	100204430	protein_coding	5.23801	299	2	2.8362	7.63983				XP_012561634.1	LOC100204430		100204430	uncharacterized protein LOC100204430
6087_0:00114c	LOC100210412	100210412	protein_coding	5.21472	300	2	9.33896	1.09049	inositol-3-phosphate synthase-like(LOC100210412)	hmg00562:Inositol phosphate metabolism,hmg01100:Metabolic pathways,hmg01130:Biosynthesis of antibiotics,	IPR002587:Myo-inositol-1-phosphate synthase,IPR013021:Myo-inositol-1-phosphate synthase, GAPDH-like,IPR016040:NAD(P)-binding domain,	XP_002160790.1	ISYNA1	T2M4H0	100210412	Inositol-3-phosphate synthase 1	GO:0008654|GO:0006021	phospholipid biosynthetic process|inositol biosynthetic process	GO:0004512	inositol-3-phosphate synthase activity	GO:0005737	cytoplasm
6087_0:000325	LOC100201543	100201543	protein_coding	5.16824	301	2	8.35455	1.98192	phosphate carrier protein, mitochondrial-like(LOC100201543)		IPR018108:Mitochondrial substrate/solute carrier,IPR023395:Mitochondrial carrier domain,	XP_002158336.1	SLC25A3	T2MES5	100201543	Phosphate carrier protein,mitochondrial	GO:0006839|GO:0055085	mitochondrial transport|transmembrane transport			GO:0005743|GO:0016021|GO:0016020	mitochondrial inner membrane|integral component of membrane|membrane
	LOC105848154	105848154	lncRNA	5.1457	302	1	10.2914	0
6087_0:00004b	LOC100200513	100200513	protein_coding	5.13174	303	2	9.47351	0.789969				XP_004205459.1	LOC100200513		100200513	histone H4	GO:0006352|GO:0006334	DNA-templated transcription, initiation|nucleosome assembly	GO:0046982|GO:0042393	protein heterodimerization activity|histone binding	GO:0000790|GO:0005634|GO:0000788|GO:0005694	NA|nucleus|chromosome
	LOC105845084	105845084	lncRNA	5.1174	304	1	10.2348	0
6087_0:003f9e	LOC105848487	105848487	protein_coding	5.04162	305	2	9.30081	0.782434				XP_012564066.1	LOC105848487		105848487	uncharacterized protein LOC105848487
6087_0:004ab2	LOC100203042	100203042	protein_coding	5.0382	306	1	10.0764	0				XP_012566106.1	LOC100203042		100203042	uncharacterized protein LOC100203042					GO:0016021	integral component of membrane
6087_0:00144e	LOC100197965	100197965	protein_coding	5.03675	307	2	8.47807	1.59542				XP_012555448.1	LOC100197965		100197965	probable serine/threonine-protein kinase kinX isoform X1
6087_0:001335	LOC100211907	100211907	protein_coding	5.01525	308	2	9.3476	0.68291				XP_002163558.2	LOC100211907		100211907	uncharacterized protein LOC100211907					GO:0016021	integral component of membrane
	LOC105849519	105849519	lncRNA	5.0057	309	1	10.0114	0
6087_0:000735	LOC100209298	100209298	protein_coding	4.94719	310	2	9.38714	0.507246				XP_012565248.1	LOC100209298		100209298	dystonin-like			GO:0003779|GO:0005509	actin binding|calcium ion binding
6087_0:0041f5	LOC100207010	100207010	protein_coding	4.93189	311	2	7.59606	2.26771	ubiquitin-conjugating enzyme E2-17 kDa(LOC100207010)	hmg04120:Ubiquitin mediated proteolysis,hmg04141:Protein processing in endoplasmic reticulum,	IPR000608:Ubiquitin-conjugating enzyme, E2,IPR016135:Ubiquitin-conjugating enzyme/RWD-like,IPR023313:Ubiquitin-conjugating enzyme, active site,	XP_002160722.1	UBE2D2	T2MEM2	100207010	Ubiquitin-conjugating enzyme E2 D2	GO:0070936	protein K48-linked ubiquitination	GO:0000166|GO:0016740|GO:0005524|GO:0061631	nucleotide binding|transferase activity|ATP binding|ubiquitin conjugating enzyme activity
6087_0:0046e2	LOC100203778	100203778	protein_coding	4.88702	312	2	5.29885	4.47519				XP_002156732.2	LOC100203778		100203778	soma ferritin-like	GO:0006879|GO:0006880	cellular iron ion homeostasis|intracellular sequestering of iron ion	GO:0004322|GO:0046872|GO:0008199|GO:0005506	ferroxidase activity|metal ion binding|ferric iron binding|iron ion binding	GO:0005623|GO:0005737	NA|cytoplasm
6087_0:003819	LOC100197789	100197789	protein_coding	4.85921	313	2	8.47492	1.24351	innexin inx1-like(LOC100197789)		IPR000990:Innexin,	NP_001274699.1	inx	Q2EMV6	100197789	Innexin	GO:0006811	ion transport			GO:0005921|GO:0016021	gap junction|integral component of membrane
6087_0:002862	LOC100205834	100205834	protein_coding	4.85392	314	2	8.63323	1.07461	myosin heavy chain, striated muscle-like(LOC100205834)		IPR000048:IQ motif, EF-hand binding site,IPR001609:Myosin head, motor domain,IPR002928:Myosin tail,IPR004009:Myosin, N-terminal, SH3-like,IPR027401:Myosin-like IQ motif-containing domain,IPR027417:P-loop containing nucleoside triphosphate hydrolase,	XP_002157926.3	MYH6	T2MHH5	100205834	Myosin-6	GO:0007018	microtubule-based movement	GO:0003774|GO:0008017|GO:0003777|GO:0005524|GO:0051015|GO:0003779|GO:0000166	motor activity|microtubule binding|microtubule motor activity|ATP binding|actin filament binding|actin binding|nucleotide binding	GO:0016459	myosin complex
6087_0:00102d	LOC100203913	100203913	protein_coding	4.83056	315	2	7.67608	1.98504	adenylyl cyclase-associated protein-like(LOC100203913)		IPR001837:Adenylate cyclase-associated CAP,IPR006599:CARP motif,IPR013912:Adenylate cyclase-associated CAP, C-terminal,IPR013992:Adenylate cyclase-associated CAP, N-terminal,IPR016098:Cyclase-associated protein CAP/septum formation inhibitor MinC, C-terminal,IPR017901:C-CAP/cofactor C-like domain,IPR018106:CAP, conserved site,	XP_012554598.1	CAP2	T2MFW9	100203913	Adenylyl cyclase-associated protein	GO:0007015|GO:0007010|GO:0045761|GO:0008154	actin filament organization|cytoskeleton organization|regulation of adenylate cyclase activity|actin polymerization or depolymerization	GO:0003779|GO:0008179	actin binding|adenylate cyclase binding	GO:0030864	cortical actin cytoskeleton
6087_0:000240	LOC100197391	100197391	protein_coding	4.82735	316	2	7.59952	2.05518				XP_012555684.1	LOC100197391		100197391	keratin-associated protein 10-6-like isoform X1
	trnas-aga		tRNA	4.79931	317	1	0	9.59863
6087_0:001c27	LOC100213354	100213354	protein_coding	4.79378	318	2	6.0219	3.56566				XP_002164044.3	LOC100213354		100213354	kinectin-like					GO:0016020|GO:0016021|GO:0005783	membrane|integral component of membrane|endoplasmic reticulum
6087_0:004797	LOC100205558	100205558	protein_coding	4.782	319	2	8.28407	1.27992	rhamnose-binding lectin-like(LOC100205558)		IPR000922:D-galactoside/L-rhamnose binding SUEL lectin domain,IPR002557:Chitin binding domain,	XP_002166914.1	C21orf63	T2MFB8	100205558	Uncharacterized protein C21orf63
6087_0:0041a8	LOC100197517	100197517	protein_coding	4.745	320	2	8.37855	1.11145				XP_002156854.1	LOC100197517		100197517	venom protein 302-like	GO:0001558	regulation of cell growth	GO:0005520	insulin-like growth factor binding	GO:0005576	extracellular region
6087_0:0034d4	LOC100204853	100204853	protein_coding	4.72624	321	2	7.28155	2.17093				XP_002158871.1	LOC100204853		100204853	flagellar calcium-binding protein-like			GO:0005509	calcium ion binding
6087_0:003234	LOC100208847	100208847	protein_coding	4.71289	322	2	8.83829	0.587481				XP_002155592.2	LOC100208847		100208847	12 kDa FK506-binding protein-like	GO:0061077|GO:0000413	chaperone-mediated protein folding|protein peptidyl-prolyl isomerization	GO:0005528|GO:0016853	FK506 binding|isomerase activity	GO:0005737	cytoplasm
6087_0:002cc5	LOC101240008	101240008	protein_coding	4.70701	323	2	8.44522	0.968809				XP_004209675.1	LOC101240008		101240008	pre-rRNA-processing protein TSR1 homolog
6087_0:002aba	LOC100204484	100204484	protein_coding	4.70488	324	2	7.63833	1.77144	myosin regulatory light chain 12B-like(LOC100204484)		IPR002048:EF-hand domain,IPR011992:EF-hand-like domain,IPR018247:EF-Hand 1, calcium-binding site,	XP_002156446.1	MYL12B	T2MJJ5	100204484	Myosin regulatory light chain 12B			GO:0005509	calcium ion binding
6087_0:001686	LOC100199505	100199505	protein_coding	4.68622	325	1	9.24375	0.128684				XP_012555900.1	LOC100199505		100199505	apolipophorins-like	GO:0006869	lipid transport	GO:0005319	lipid transporter activity
6087_0:000886	LOC100199437	100199437	protein_coding	4.66697	326	2	7.93345	1.40048				XP_002166093.1	LOC100199437		100199437	tubulin alpha chain-like	GO:0007017|GO:0007010	microtubule-based process|cytoskeleton organization	GO:0003924|GO:0005200|GO:0005525|GO:0000166	GTPase activity|structural constituent of cytoskeleton|GTP binding|nucleotide binding	GO:0005737|GO:0005874|GO:0005856	cytoplasm|microtubule|cytoskeleton
6087_0:0033db	LOC100197138	100197138	protein_coding	4.66463	327	2	7.72622	1.60305	cathepsin L1-like(LOC100197138)	hmg04142:Lysosome,hmg04145:Phagosome,		XP_002155462.2	LOC100197138		100197138	cathepsin L1-like	GO:0006508|GO:0051603	proteolysis|proteolysis involved in cellular protein catabolic process	GO:0004197	cysteine-type endopeptidase activity	GO:0005764|GO:0005615	lysosome|extracellular space
6087_0:003568	LOC100205469	100205469	protein_coding	4.63191	328	2	3.22321	6.04061				XP_002154001.3	LOC100205469		100205469	helicase domino-like	GO:0006338	chromatin remodeling	GO:0005524	ATP binding	GO:0031011|GO:0005634	Ino80 complex|nucleus
6087_0:004759	LOC100209130	100209130	protein_coding	4.62882	329	2	8.17545	1.08219	ATP synthase subunit beta, mitochondrial(LOC100209130)	hmg00190:Oxidative phosphorylation,hmg01100:Metabolic pathways,		XP_002156597.1	LOC100209130		100209130	ATP synthase subunit beta, mitochondrial	GO:0015986|GO:0046034|GO:0015992|GO:0099132	ATP synthesis coupled proton transport|ATP metabolic process|NA	GO:0046933|GO:0005524|GO:0000166	proton-transporting ATP synthase activity, rotational mechanism|ATP binding|nucleotide binding	GO:0045261	proton-transporting ATP synthase complex, catalytic core F(1)
	LOC105846004	105846004	lncRNA	4.60819	330	1	9.21638	0
6087_0:001a42	LOC105844501	105844501	protein_coding	4.57225	331	2	8.14783	0.996672				XP_012556640.1	LOC105844501		105844501	sorcin-like	GO:0006508	proteolysis	GO:0005509|GO:0046982|GO:0004198	calcium ion binding|protein heterodimerization activity|calcium-dependent cysteine-type endopeptidase activity	GO:0005829|GO:0005737	cytosol|cytoplasm
6087_0:004b8a	LOC101241037	101241037	protein_coding	4.5387	332	1	9.0774	0				XP_004213013.1	LOC101241037		101241037	uncharacterized protein LOC101241037
6087_0:00207a	LOC100202353	100202353	protein_coding	4.49943	333	2	7.96598	1.03288				XP_002160112.1	LOC100202353		100202353	radixin-like			GO:0003779|GO:0008092	actin binding|cytoskeletal protein binding	GO:0005856|GO:0045177	cytoskeleton|apical part of cell
6087_0:0004d4	LOC100197237	100197237	protein_coding	4.46826	334	2	7.43835	1.49818				XP_002160144.1	LOC100197237		100197237	uncharacterized protein LOC100197237			GO:0043565	sequence-specific DNA binding	GO:0005634|GO:0005667|GO:0005737|GO:0005813	nucleus|transcription regulator complex|cytoplasm|centrosome
6087_0:0027dc	LOC100215003	100215003	protein_coding	4.45135	335	2	8.12364	0.779065	endoplasmin-like(LOC100215003)	hmg04141:Protein processing in endoplasmic reticulum,		XP_002157524.1	LOC100215003		100215003	endoplasmin-like	GO:0006950	response to stress	GO:0051082|GO:0005524	unfolded protein binding|ATP binding
	LOC100213524	100213524	lncRNA	4.41662	336	2	7.78876	1.04449
6087_0:00141c	LOC100205955	100205955	protein_coding	4.37889	337	2	7.91302	0.844758				XP_012555412.1	LOC100205955		100205955	fibrillin-1-like			GO:0005509	calcium ion binding	GO:0005576	extracellular region
	LOC105847492	105847492	lncRNA	4.36147	338	2	7.55536	1.16758
	LOC100210032	100210032	misc_RNA	4.33288	339	2	6.39789	2.26787
6087_0:0030be	LOC100201890	100201890	protein_coding	4.32103	340	2	8.03453	0.607533	beta-amyloid-like protein(LOC100201890)		IPR008154:Amyloidogenic glycoprotein, extracellular,IPR008155:Amyloidogenic glycoprotein,IPR011178:Amyloidogenic glycoprotein, copper-binding,IPR015849:Amyloidogenic glycoprotein, heparin-binding,IPR019543:Beta-amyloid precursor protein C-terminal,IPR019744:Amyloidogenic glycoprotein, extracellular domain conserved site,IPR024329:Amyloidogenic glycoprotein, E2 domain,	XP_002154415.1	APLP1	T2MFP9	100201890	Amyloid-like protein 1			GO:0046914|GO:0008201|GO:0042802	transition metal ion binding|heparin binding|identical protein binding	GO:0016021|GO:0016020	integral component of membrane|membrane
6087_0:000b8c	LOC100213966	100213966	protein_coding	4.31631	341	2	7.83701	0.795601	adenylate kinase 2, mitochondrial-like(LOC100213966)	hmg00230:Purine metabolism,hmg01100:Metabolic pathways,hmg01130:Biosynthesis of antibiotics,	IPR000850:Adenylate kinase,IPR006259:Adenylate kinase subfamily,IPR007862:Adenylate kinase, active site lid domain,IPR027417:P-loop containing nucleoside triphosphate hydrolase,	XP_002168035.2	AK2	T2MF38	100213966	Adenylate kinase	GO:0006172|GO:0046033|GO:0046939|GO:0016310|GO:0046039|GO:0046034	ADP biosynthetic process|AMP metabolic process|nucleotide phosphorylation|phosphorylation|GTP metabolic process|ATP metabolic process	GO:0016776|GO:0016740|GO:0016301|GO:0000166|GO:0005524|GO:0004017|GO:0019205|GO:0046899	phosphotransferase activity, phosphate group as acceptor|transferase activity|kinase activity|nucleotide binding|ATP binding|adenylate kinase activity|nucleobase-containing compound kinase activity|nucleoside triphosphate adenylate kinase activity	GO:0005739|GO:0016021|GO:0005829	mitochondrion|integral component of membrane|cytosol
6087_0:00081e	LOC100204217	100204217	protein_coding	4.31541	342	2	7.33519	1.29563	ras-like GTP-binding protein RHO(LOC100204217)	hmg04144:Endocytosis,hmg04310:Wnt signaling pathway,hmg04350:TGF-beta signaling pathway,	IPR001806:Small GTPase superfamily,IPR005225:Small GTP-binding protein domain,IPR027417:P-loop containing nucleoside triphosphate hydrolase,	XP_002156827.1	RHOA	T2MF79	100204217	Transforming protein RhoA	GO:0007264	small GTPase mediated signal transduction	GO:0003924|GO:0005525|GO:0000166	GTPase activity|GTP binding|nucleotide binding	GO:0005622|GO:0016020|GO:0032154	intracellular anatomical structure|membrane|cleavage furrow
6087_0:002a51	LOC100210856	100210856	protein_coding	4.25639	343	1	8.21775	0.295023				XP_012559904.1	LOC100210856		100210856	uncharacterized protein LOC100210856			GO:0005509	calcium ion binding	GO:0005576	extracellular region
6087_0:0019b8	LOC100192246	100192246	protein_coding	4.2279	344	2	3.20507	5.25074				XP_002156132.2	LOC100192246		100192246	uncharacterized protein LOC100192246
6087_0:002339	LOC101236711	101236711	protein_coding	4.20648	345	2	6.45361	1.95935				XP_004208721.1	LOC101236711		101236711	uncharacterized protein LOC101236711
6087_0:0024df	LOC100210733	100210733	protein_coding	4.19667	346	2	4.66367	3.72966				XP_002158147.2	LOC100210733		100210733	dnaJ homolog subfamily B member 6-like	GO:0045109|GO:0032880|GO:0090084|GO:0061077	intermediate filament organization|regulation of protein localization|negative regulation of inclusion body assembly|chaperone-mediated protein folding	GO:0031072|GO:0001671|GO:0051082|GO:0051087	heat shock protein binding|ATPase activator activity|unfolded protein binding|chaperone binding	GO:0005634|GO:0005654|GO:0030018|GO:0048471|GO:0005829	nucleus|nucleoplasm|Z disc|perinuclear region of cytoplasm|cytosol
6087_0:001bf2	LOC101239600	101239600	protein_coding	4.19538	347	2	5.43583	2.95492				XP_012556982.1	LOC101239600		101239600	uncharacterized protein LOC101239600
6087_0:0026a3	LOC105845689	105845689	protein_coding	4.1855	348	2	5.45209	2.9189				XP_012559174.1	LOC105845689		105845689	L-rhamnose-binding lectin CSL3-like
6087_0:004cdb	LOC100214461	100214461	protein_coding	4.1853	349	2	3.65167	4.71893				XP_002170602.2	LOC100214461		100214461	vesicle-associated membrane protein-associated protein A-like	GO:0070972	protein localization to endoplasmic reticulum	GO:0033149	FFAT motif binding	GO:0016021|GO:0005789|GO:0016020|GO:0005783	integral component of membrane|endoplasmic reticulum membrane|membrane|endoplasmic reticulum
	LOC105850167	105850167	lncRNA	4.18095	350	1	8.36189	0
6087_0:001b13	LOC100206021	100206021	protein_coding	4.17382	351	2	7.05456	1.29308				XP_012556801.1	LOC100206021		100206021	nucleolysin TIAR-like			GO:0003676	nucleic acid binding
	LOC100199348	100199348	lncRNA	4.16677	352	2	7.68746	0.646084
6087_0:0006ce	LOC100201133	100201133	protein_coding	4.14585	353	2	7.40895	0.882755				XP_002167245.2	LOC100201133		100201133	uncharacterized protein LOC100201133
	LOC100202934	100202934	lncRNA	4.10851	354	2	6.91743	1.29958
	LOC105847545	105847545	lncRNA	4.10244	355	1	8.20488	0
6087_0:003ff7	LOC101234629	101234629	protein_coding	4.08973	356	2	7.29255	0.886908				XP_012564127.1	LOC101234629		101234629	uncharacterized protein LOC101234629
6087_0:002a41	hyzebra		protein_coding	4.07327	357	2	6.62343	1.5231				NP_001267748.1	hyzebra	Q6TGB9	100192267	Zebra
6087_0:00252f	LOC100211831	100211831	protein_coding	4.04415	358	2	7.50322	0.585078				XP_004208904.1	LOC100211831		100211831	ferritin heavy chain-like	GO:0006879	cellular iron ion homeostasis	GO:0004322|GO:0046872|GO:0008199	ferroxidase activity|metal ion binding|ferric iron binding	GO:0005623	NA
6087_0:000632	LOC100192274	100192274	protein_coding	4.01957	359	2	5.92107	2.11806				NP_001267762.1	LOC100192274	Q3I3L8	100192274	Dickkopf-like protein Dlp-2	GO:0007275	multicellular organism development			GO:0005615|GO:0005576	extracellular space|extracellular region
	hym-346		misc_RNA	4.01248	360	2	5.4192	2.60575
	LOC105843609	105843609		4.00874	361	2	5.61242	2.40506
	LOC105849742	105849742	lncRNA	3.99721	362	1	7.99442	0
	LOC105845026	105845026	lncRNA	3.97433	363	1	7.94866	0
6087_0:001874	LOC100201395	100201395	protein_coding	3.97004	364	2	7.05839	0.881699	vigilin(LOC100201395)		IPR004087:K Homology domain,IPR004088:K Homology domain, type 1,	XP_002162778.1	HDLBP	T2ME97	100201395	Vigilin			GO:0003676	nucleic acid binding
6087_0:0026c0	LOC100208093	100208093	protein_coding	3.94913	365	1	7.75883	0.139421				XP_012559193.1	LOC100208093		100208093	neurogenic locus notch homolog protein 1-like					GO:0016021	integral component of membrane
6087_0:00180b	LOC100210563	100210563	protein_coding	3.94093	366	1	7.64607	0.235793	glutamate dehydrogenase, mitochondrial-like(LOC100210563)	hmg00220:Arginine biosynthesis,hmg00250:Alanine, aspartate and glutamate metabolism,hmg00910:Nitrogen metabolism,hmg01100:Metabolic pathways,hmg01200:Carbon metabolism,	IPR006095:Glutamate/phenylalanine/leucine/valine dehydrogenase,IPR006096:Glutamate/phenylalanine/leucine/valine dehydrogenase, C-terminal,IPR006097:Glutamate/phenylalanine/leucine/valine dehydrogenase, dimerisation domain,IPR014362:Glutamate dehydrogenase,IPR016040:NAD(P)-binding domain,	XP_002167335.2	GLUD1	T2MH20	100210563	Glutamate dehydrogenase	GO:0055114	NA	GO:0016491|GO:0016639|GO:0004352	oxidoreductase activity|oxidoreductase activity, acting on the CH-NH2 group of donors, NAD or NADP as acceptor|glutamate dehydrogenase (NAD+) activity
6087_0:001cd6	LOC100205854	100205854	protein_coding	3.93487	367	2	6.86675	1.003				XP_012557147.1	LOC100205854		100205854	leukocyte cysteine proteinase inhibitor 1-like	GO:0010951	negative regulation of endopeptidase activity	GO:0004866	endopeptidase inhibitor activity	GO:0005622	intracellular anatomical structure
6087_0:004958	LOC100204267	100204267	protein_coding	3.89808	368	1	7.79616	0				XP_002161992.2	LOC100204267		100204267	histone H4	GO:0006352|GO:0006334	DNA-templated transcription, initiation|nucleosome assembly	GO:0046982|GO:0042393	protein heterodimerization activity|histone binding	GO:0000790|GO:0005634|GO:0000788|GO:0005694	NA|nucleus|chromosome
6087_0:001f94	LOC100206373	100206373	protein_coding	3.89624	369	1	7.47341	0.319064				XP_012557721.1	LOC100206373		100206373	filamin-A-like			GO:0003779	actin binding
	LOC100209048	100209048	lncRNA	3.88809	370	2	7.14274	0.633446
6087_0:002583	LOC100200684	100200684	protein_coding	3.87083	371	2	6.67696	1.0647	superoxide dismutase [Cu-Zn] 2-like(LOC100200684)	hmg04146:Peroxisome,	IPR001424:Superoxide dismutase, copper/zinc binding domain,IPR018152:Superoxide dismutase, copper/zinc, binding site,IPR024134:Superoxide dismutase (Cu/Zn) / chaperones,	XP_012558939.1	SOD1	I3V7W8	100200684	Superoxide dismutase	GO:0055114|GO:0006801|GO:0019430	NA|superoxide metabolic process|removal of superoxide radicals	GO:0005507|GO:0008270|GO:0046872|GO:0016491	copper ion binding|zinc ion binding|metal ion binding|oxidoreductase activity	GO:0005615|GO:0005737	extracellular space|cytoplasm
6087_0:003df8	LOC100208544	100208544	protein_coding	3.85337	372	1	7.33123	0.375502	prosaposin-like(LOC100208544)	hmg04142:Lysosome,		XP_002160800.3	LOC100208544		100208544	prosaposin-like isoform X1	GO:0006629|GO:0006665	lipid metabolic process|sphingolipid metabolic process	GO:0001664	G protein-coupled receptor binding	GO:0005764|GO:0005737	lysosome|cytoplasm
	LOC101239135	101239135	lncRNA	3.85068	373	2	6.71997	0.981391
6087_0:001488	LOC100209995	100209995	protein_coding	3.84485	374	1	7.68971	0	serine/arginine-rich splicing factor 6-like(LOC100209995)	hmg03040:Spliceosome,	IPR000504:RNA recognition motif domain,IPR012677:Nucleotide-binding, alpha-beta plait,	XP_002164119.1	SRSF4	T2MDY1	100209995	Serine/arginine-rich splicing factor 4			GO:0003676	nucleic acid binding
6087_0:003616	LOC100200835	100200835	protein_coding	3.83918	375	2	6.58045	1.09791	tubulin alpha-1 chain(LOC100200835)	hmg04145:Phagosome,		XP_002161507.1	LOC100200835		100200835	tubulin alpha-1 chain	GO:0007017|GO:0007010	microtubule-based process|cytoskeleton organization	GO:0003924|GO:0005200|GO:0005525|GO:0000166	GTPase activity|structural constituent of cytoskeleton|GTP binding|nucleotide binding	GO:0005737|GO:0005874|GO:0005856	cytoplasm|microtubule|cytoskeleton
6087_0:000bec	LOC100204573	100204573	protein_coding	3.83693	376	2	4.58693	3.08694				XP_002161765.1	LOC100204573		100204573	muscle-specific protein 20-like
6087_0:001944	LOC100212585	100212585	protein_coding	3.79593	377	2	6.84926	0.742607				XP_002166312.1	LOC100212585		100212585	probable splicing factor, arginine/serine-rich 6			GO:0008270|GO:0003676	zinc ion binding|nucleic acid binding
6087_0:00442d	LOC100203182	100203182	protein_coding	3.7797	378	2	5.4047	2.1547				XP_002158712.1	LOC100203182		100203182	uncharacterized protein LOC100203182
	trnaw-cca		tRNA	3.76214	379	1	7.52428	0
	LOC105845507	105845507	lncRNA	3.75289	380	1	7.50577	0
	LOC105847344	105847344	lncRNA	3.74348	381	1	7.48695	0
6087_0:004e39	CYTB		protein_coding	3.72843	382	1	7.45685	0				YP_002221537.1	CYTB	B4F7N3	6904240	Cytochrome b	GO:0006122|GO:0055114|GO:0022904	mitochondrial electron transport, ubiquinol to cytochrome c|NA|respiratory electron transport chain	GO:0008121|GO:0016491|GO:0046872	ubiquinol-cytochrome-c reductase activity|oxidoreductase activity|metal ion binding	GO:0005739|GO:0016020|GO:0016021|GO:0005743|GO:0070469	mitochondrion|membrane|integral component of membrane|mitochondrial inner membrane|respirasome
6087_0:003e9d	LOC105848353	105848353	protein_coding	3.70887	383	1	7.41775	0				XP_012563879.1	LOC105848353		105848353	uncharacterized protein LOC105848353	GO:0015074	DNA integration	GO:0003676	nucleic acid binding
6087_0:0048ea	LOC100202892	100202892	protein_coding	3.70806	384	1	7.05889	0.35723				XP_004212674.2	LOC100202892		100202892	protocadherin Fat 1
6087_0:00106c	LOC100210541	100210541	protein_coding	3.69227	385	2	6.52018	0.864363	complement component 1 Q subcomponent-binding protein, mitochondrial-like(LOC100210541)		IPR003428:Mitochondrial glycoprotein,	XP_002155810.1	C1QBP	T2MDZ5	100210541	Complement component 1 Q subcomponent-binding protein, mitochondrial					GO:0005739	mitochondrion
6087_0:000981	LOC105850946	105850946	protein_coding	3.68777	386	1	7.37555	0	prostaglandin E synthase 3-like(LOC105850946)		IPR007052:CS-like domain,IPR008978:HSP20-like chaperone,	XP_012566964.1	PTGES3	T2MCW6	105850946	Prostaglandin E synthase 3	GO:0001516	prostaglandin biosynthetic process			GO:0005634|GO:0005829|GO:0005654	nucleus|cytosol|nucleoplasm
6087_0:0011b8	LOC100200823	100200823	protein_coding	3.67274	387	2	6.77819	0.567298	syntenin-1-like(LOC100200823)		IPR001478:PDZ domain,	XP_012554918.1	SDCBP	T2MJA7	100200823	Syntenin-1	GO:0030036|GO:0007268	actin cytoskeleton organization|chemical synaptic transmission			GO:0005622	intracellular anatomical structure
6087_0:001338	LOC100198742	100198742	protein_coding	3.66101	388	2	6.41219	0.909825				XP_012555232.1	LOC100198742		100198742	headcase protein homolog isoform X1	GO:0045930	negative regulation of mitotic cell cycle			GO:0005737|GO:0005634	cytoplasm|nucleus
	LOC105850285	105850285	lncRNA	3.65171	389	1	7.30342	0
	trnar-ccg		tRNA	3.64271	390	1	7.28542	0
6087_0:004e33	ATP8		protein_coding	3.6425	391	1	7.285	0				YP_002221527.1	ATP8	B4F7M2	6904227	ATP synthase F0 subunit 8
6087_0:001054	LOC105843599	105843599	protein_coding	3.63318	392	1	6.90796	0.358392				XP_012554628.1	LOC105843599		105843599	microtubule-actin cross-linking factor 1-like			GO:0003779|GO:0005509|GO:0008017	actin binding|calcium ion binding|microtubule binding	GO:0005856	cytoskeleton
6087_0:002f84	LOC100204546	100204546	protein_coding	3.62089	393	2	6.30297	0.938811				XP_002154888.2	LOC100204546		100204546	glycine-rich RNA-binding protein 10-like isoform X1			GO:0003676	nucleic acid binding
	LOC105850143	105850143	lncRNA	3.56772	394	1	7.13543	0
6087_0:0007ba	LOC101237436	101237436	protein_coding	3.55887	395	1	6.84553	0.272206				XP_004206099.1	LOC101237436		101237436	myosin heavy chain, striated muscle-like	GO:0007018	microtubule-based movement	GO:0003774|GO:0008017|GO:0003777|GO:0005524|GO:0051015|GO:0003779|GO:0000166	motor activity|microtubule binding|microtubule motor activity|ATP binding|actin filament binding|actin binding|nucleotide binding	GO:0016459	myosin complex
	LOC100207793	100207793	lncRNA	3.54522	396	2	6.36365	0.7268
	trnai-aau		tRNA	3.54306	397	1	7.08611	0
6087_0:0049b3	LOC100200514	100200514	protein_coding	3.53275	398	2	6.65843	0.407061				XP_012565931.1	LOC100200514		100200514	rhamnose-binding lectin-like
6087_0:002563	LOC100197130	100197130	protein_coding	3.52354	399	2	6.22628	0.820806				XP_012558915.1	LOC100197130		100197130	uncharacterized protein LOC100197130	GO:0006030	chitin metabolic process	GO:0008061	chitin binding	GO:0005576	extracellular region
6087_0:000588	LOC100215375	100215375	protein_coding	3.51832	400	2	6.33474	0.701902	nucleolar GTP-binding protein 1(LOC100215375)	hmg03008:Ribosome biogenesis in eukaryotes,		XP_012562205.1	LOC100215375		100215375	LOW QUALITY PROTEIN: nucleolar GTP-binding protein 1	GO:0000054|GO:1902626|GO:0042273	ribosomal subunit export from nucleus|assembly of large subunit precursor of preribosome|ribosomal large subunit biogenesis	GO:0005525	GTP binding	GO:0005730|GO:0005634|GO:0030687	nucleolus|nucleus|preribosome, large subunit precursor
	LOC105846578	105846578	lncRNA	3.51805	401	1	7.03611	0
6087_0:003c0a	LOC100192252	100192252	protein_coding	3.48211	402	1	6.57129	0.392924	lamin-C(LOC100192252)		IPR001664:Intermediate filament protein,	XP_002166919.2	NemB	B3A0T0	100192252	Nematocilin B			GO:0005198	structural molecule activity	GO:0005882	intermediate filament
6087_0:004023	LOC101237907	101237907	protein_coding	3.48046	403	2	5.39191	1.569				XP_004211728.1	LOC101237907		101237907	glutaredoxin-like	GO:0022900|GO:0055114	electron transport chain|NA			GO:0005623	NA
6087_0:004760	LOC100197160	100197160	protein_coding	3.47889	404	1	6.62722	0.330555				XP_012565494.1	LOC100197160		100197160	matrilysin-like	GO:0006508	proteolysis	GO:0008237|GO:0004222|GO:0046872|GO:0008270|GO:0008233|GO:0016787	metallopeptidase activity|metalloendopeptidase activity|metal ion binding|zinc ion binding|peptidase activity|hydrolase activity
6087_0:002b9b	LOC100200194	100200194	protein_coding	3.47017	405	2	6.40295	0.537398	minicollagen 8(LOC100200194)		IPR008160:Collagen triple helix repeat,	NP_001267735.1	LOC100200194	G7H7W1	100200194	Minicollagen 8
6087_0:0038f6	LOC100205782	100205782	protein_coding	3.4579	406	2	5.82568	1.09013				XP_002165348.1	LOC100205782		100205782	CD151 antigen-like	GO:0007166	cell surface receptor signaling pathway			GO:0016021|GO:0005887	integral component of membrane|integral component of plasma membrane
6087_0:004c17	LOC100214688	100214688	protein_coding	3.44912	407	1	6.59831	0.299939				XP_002168677.2	LOC100214688		100214688	ras GTPase-activating-like protein IQGAP1			GO:0005516	calmodulin binding	GO:0005737	cytoplasm
6087_0:0023b6	LOC100202906	100202906	protein_coding	3.44739	408	2	6.42909	0.465687				XP_002163749.3	LOC100202906		100202906	heterogeneous nuclear ribonucleoprotein A/B-like			GO:0003676	nucleic acid binding
6087_0:003a7e	LOC101236174	101236174	protein_coding	3.44729	409	2	4.76971	2.12488				XP_004211127.1	LOC101236174		101236174	uncharacterized protein LOC101236174
6087_0:003f75	LOC100206675	100206675	protein_coding	3.4443	410	2	5.13853	1.75007	ras-related C3 botulinum toxin substrate 1(LOC100206675)	hmg04145:Phagosome,hmg04310:Wnt signaling pathway,	IPR001806:Small GTPase superfamily,IPR005225:Small GTP-binding protein domain,IPR027417:P-loop containing nucleoside triphosphate hydrolase,	XP_002158815.1	RAC1	T2MF17	100206675	Ras-related C3 botulinum toxin substrate 1	GO:0007264|GO:0030036	small GTPase mediated signal transduction|actin cytoskeleton organization	GO:0000166|GO:0005525|GO:0003924	nucleotide binding|GTP binding|GTPase activity	GO:0005622|GO:0016020	intracellular anatomical structure|membrane
6087_0:000faf	LOC100212669	100212669	protein_coding	3.38682	411	2	6.01396	0.759688				XP_004206807.1	CAPRIN1	T2MCW1	100212669	Caprin-1
6087_0:002151	LOC100201633	100201633	protein_coding	3.38182	412	2	5.04726	1.71638				XP_002163027.1	LOC100201633		100201633	antistasin-like
6087_0:0026dc	LOC100200137	100200137	protein_coding	3.38134	413	2	5.85342	0.909269	78 kDa glucose-regulated protein-like(LOC100200137)	hmg03060:Protein export,hmg04141:Protein processing in endoplasmic reticulum,	IPR013126:Heat shock protein 70 family,IPR018181:Heat shock protein 70, conserved site,	XP_002156272.1	HSPA5	T2MH41	100200137	78 kDa glucose-regulated protein			GO:0005524|GO:0000166	ATP binding|nucleotide binding
6087_0:0016b5	LOC100201295	100201295	protein_coding	3.37793	414	2	5.39786	1.358	eukaryotic translation initiation factor 1-like(LOC100201295)	hmg03013:RNA transport,	IPR001950:Translation initiation factor SUI1,IPR005874:Eukaryotic translation initiation factor SUI1,	XP_002163776.1	EIF1B	T2MIW5	100201295	Eukaryotic translation initiation factor 1b
6087_0:0028b4	LOC105845891	105845891	protein_coding	3.37077	415	2	6.33557	0.405968				XP_012559576.1	LOC105845891		105845891	uncharacterized protein LOC105845891					GO:0005829	cytosol
	LOC105847960	105847960	lncRNA	3.3629	416	2	1.52913	5.19667
6087_0:003a49	LOC100207118	100207118	protein_coding	3.3621	417	2	5.69001	1.03418				XP_002156816.1	LOC100207118		100207118	uncharacterized protein LOC100207118
	LOC105843213	105843213	lncRNA	3.3605	418	2	5.9336	0.78741
6087_0:0024a0	LOC100213338	100213338	protein_coding	3.35609	419	2	5.30355	1.40864				XP_002167764.1	LOC100213338		100213338	pol-RFamide neuropeptides-like
6087_0:003e4e	LOC100204515	100204515	protein_coding	3.29754	420	1	6.32095	0.274122	DNA-directed RNA polymerase II subunit RPB1-like(LOC100204515)	hmg00230:Purine metabolism,hmg00240:Pyrimidine metabolism,hmg01100:Metabolic pathways,hmg03020:RNA polymerase,		XP_002164354.3	LOC100204515		100204515	DNA-directed RNA polymerase II subunit RPB1-like			GO:0016740|GO:0016779	transferase activity|nucleotidyltransferase activity	GO:0005665|GO:0005634	RNA polymerase II, core complex|nucleus
6087_0:003c7a	LOC101235321	101235321	protein_coding	3.29699	421	1	6.59398	0				XP_004211333.1	LOC101235321		101235321	uncharacterized protein LOC101235321	GO:0000723|GO:0006281|GO:0032508|GO:0006310	telomere maintenance|DNA repair|DNA duplex unwinding|DNA recombination	GO:0005524|GO:0016787|GO:0004386|GO:0000166	ATP binding|hydrolase activity|helicase activity|nucleotide binding
6087_0:0037c8	LOC100197663	100197663	protein_coding	3.29561	422	2	5.67651	0.91471				XP_012562572.1	LOC100197663		100197663	phosphoenolpyruvate carboxykinase	GO:0006094	gluconeogenesis	GO:0004613|GO:0017076|GO:0005525|GO:0004611	phosphoenolpyruvate carboxykinase (GTP) activity|purine nucleotide binding|GTP binding|phosphoenolpyruvate carboxykinase activity
6087_0:0006ba	kazal1		protein_coding	3.28186	423	2	5.8958	0.667927				NP_001267800.1	kazal1	B8Y8I4	100205908	Kazal-type serine protease inihibitor 1	GO:0006508	proteolysis	GO:0004867|GO:0008236|GO:0016787|GO:0008233|GO:0004252	serine-type endopeptidase inhibitor activity|serine-type peptidase activity|hydrolase activity|peptidase activity|serine-type endopeptidase activity
6087_0:000cf8	LOC100208718	100208718	protein_coding	3.27651	424	2	5.53079	1.02224	malate dehydrogenase, cytoplasmic-like(LOC100208718)	hmg00020:Citrate cycle (TCA cycle),hmg00270:Cysteine and methionine metabolism,hmg00620:Pyruvate metabolism,hmg00630:Glyoxylate and dicarboxylate metabolism,hmg01100:Metabolic pathways,hmg01130:Biosynthesis of antibiotics,hmg01200:Carbon metabolism,		XP_012553917.1	LOC100208718		100208718	malate dehydrogenase, cytoplasmic-like	GO:0019752|GO:0006099|GO:0006108|GO:0055114|GO:0006107|GO:0006734	carboxylic acid metabolic process|tricarboxylic acid cycle|malate metabolic process|NA|oxaloacetate metabolic process|NADH metabolic process	GO:0030060|GO:0016615|GO:0016491|GO:0016616|GO:0003824	L-malate dehydrogenase activity|malate dehydrogenase activity|oxidoreductase activity|oxidoreductase activity, acting on the CH-OH group of donors, NAD or NADP as acceptor|catalytic activity	GO:0005739|GO:0005829	mitochondrion|cytosol
6087_0:00218e	LOC100215556	100215556	protein_coding	3.27177	425	1	6.24749	0.296056	alpha-actinin, sarcomeric-like(LOC100215556)		IPR001589:Actinin-type, actin-binding, conserved site,IPR001715:Calponin homology domain,IPR002017:Spectrin repeat,IPR002048:EF-hand domain,IPR011992:EF-hand-like domain,IPR014837:EF-hand, Ca insensitive,IPR018159:Spectrin/alpha-actinin,IPR018247:EF-Hand 1, calcium-binding site,	XP_004208576.1	ACTN1	T2MHI5	100215556	Alpha-actinin-1			GO:0005509|GO:0003779|GO:0044325|GO:0051015|GO:0042803	calcium ion binding|actin binding|ion channel binding|actin filament binding|protein homodimerization activity	GO:0005622|GO:0005903|GO:0030017|GO:0030018	intracellular anatomical structure|brush border|sarcomere|Z disc
6087_0:00332a	LOC100212818	100212818	protein_coding	3.27005	426	2	4.96182	1.57828	AN1-type zinc finger protein 5-like(LOC100212818)		IPR000058:Zinc finger, AN1-type,IPR002653:Zinc finger, A20-type,	XP_002160663.3	ZFAND5	T2MIH9	100212818	AN1-type zinc finger protein 5			GO:0046872|GO:0008270	metal ion binding|zinc ion binding
6087_0:0035cf	LOC100209591	100209591	protein_coding	3.26498	427	2	3.00676	3.52321				XP_012562177.1	LOC100209591		100209591	dual specificity mitogen-activated protein kinase kinase 6-like	GO:0006468|GO:0031098|GO:0032147|GO:0007346|GO:0042981|GO:0023014	protein phosphorylation|stress-activated protein kinase signaling cascade|activation of protein kinase activity|regulation of mitotic cell cycle|regulation of apoptotic process|NA	GO:0005524	ATP binding	GO:0005737	cytoplasm
6087_0:000777	LOC100203123	100203123	protein_coding	3.25732	428	2	5.78761	0.727037				XP_002167160.2	LOC100203123		100203123	importin-5-like	GO:0006610|GO:0006607|GO:0000060	ribosomal protein import into nucleus|NLS-bearing protein import into nucleus|NA	GO:0005488|GO:0008139	binding|nuclear localization sequence binding	GO:0005737|GO:0034399|GO:0031965	cytoplasm|nuclear periphery|nuclear membrane
6087_0:00242f	LOC100207250	100207250	protein_coding	3.25557	429	2	5.74681	0.76433				XP_012558692.1	LOC100207250		100207250	fibrillin-1-like			GO:0005509	calcium ion binding
6087_0:00212d	LOC100208142	100208142	protein_coding	3.25478	430	1	6.50956	0	thymocyte nuclear protein 1-like(LOC100208142)		IPR002740:EVE domain,IPR015947:PUA-like domain,	XP_012558048.1	THYN1	T2M498	100208142	Thymocyte nuclear protein 1					GO:0005634	nucleus
6087_0:004ab1	LOC100201420	100201420	protein_coding	3.23933	431	2	5.73283	0.74582	cathepsin L1-like(LOC100201420)	hmg04142:Lysosome,hmg04145:Phagosome,		XP_002167224.1	LOC100201420		100201420	cathepsin L1-like	GO:0006508|GO:0051603	proteolysis|proteolysis involved in cellular protein catabolic process	GO:0004197	cysteine-type endopeptidase activity	GO:0005764|GO:0005615	lysosome|extracellular space
6087_0:0035c6	LOC100197540	100197540	protein_coding	3.21828	432	1	6.16338	0.27319				XP_002159393.2	LOC100197540		100197540	agmatine deiminase-like	GO:0006807|GO:0009446	nitrogen compound metabolic process|putrescine biosynthetic process	GO:0016810|GO:0004668	hydrolase activity, acting on carbon-nitrogen (but not peptide) bonds|protein-arginine deiminase activity
	LOC105848065	105848065	lncRNA	3.21337	433	1	6.42673	0
6087_0:002153	LOC100210371	100210371	protein_coding	3.20382	434	2	5.79693	0.610716				XP_012558070.1	LOC100210371		100210371	antistasin			GO:0030414|GO:0004867	peptidase inhibitor activity|serine-type endopeptidase inhibitor activity	GO:0005576	extracellular region
	LOC100204040	100204040	lncRNA	3.2036	435	2	4.00379	2.40341
6087_0:002208	LOC100215384	100215384	protein_coding	3.20305	436	1	6.01855	0.38755				XP_012558221.1	LOC100215384		100215384	digestive cysteine proteinase 1-like	GO:0006508|GO:0051603	proteolysis|proteolysis involved in cellular protein catabolic process	GO:0004197	cysteine-type endopeptidase activity	GO:0005764|GO:0005615	lysosome|extracellular space
6087_0:000203	LOC100197414	100197414	protein_coding	3.1836	437	2	5.90576	0.461443				XP_002154968.1	LOC100197414		100197414	RNA-binding protein cabeza-like			GO:0046872|GO:0003676	metal ion binding|nucleic acid binding	GO:0005634	nucleus
6087_0:0028ef	LOC100215378	100215378	protein_coding	3.17582	438	2	4.66441	1.68722	V-type proton ATPase 16 kDa proteolipid subunit(LOC100215378)	hmg00190:Oxidative phosphorylation,hmg01100:Metabolic pathways,hmg04142:Lysosome,hmg04145:Phagosome,		XP_002165747.1	LOC100215378		100215378	V-type proton ATPase 16 kDa proteolipid subunit	GO:0015991|GO:0006811|GO:0015992|GO:0007042	NA|ion transport|lysosomal lumen acidification	GO:0015078|GO:0046961	proton transmembrane transporter activity|proton-transporting ATPase activity, rotational mechanism	GO:0016021|GO:0033179|GO:0033177|GO:0005773|GO:0005774|GO:0016020|GO:0000220	integral component of membrane|proton-transporting V-type ATPase, V0 domain|proton-transporting two-sector ATPase complex, proton-transporting domain|vacuole|vacuolar membrane|membrane|vacuolar proton-transporting V-type ATPase, V0 domain
6087_0:002fd1	LOC100201205	100201205	protein_coding	3.1742	439	1	6.34839	0	signal peptidase complex subunit 1-like(LOC100201205)	hmg03060:Protein export,	IPR009542:Microsomal signal peptidase 12kDa subunit,	XP_012560998.1	SPCS1	T2M2I4	100201205	Signal peptidase complex subunit 1	GO:0045047|GO:0006465	protein targeting to ER|signal peptide processing	GO:0008233	peptidase activity	GO:0005787|GO:0016021|GO:0030176|GO:0016020	signal peptidase complex|integral component of membrane|integral component of endoplasmic reticulum membrane|membrane
6087_0:0037c6	LOC100197287	100197287	protein_coding	3.17332	440	1	6.11554	0.23109				XP_002157812.1	LOC100197287		100197287	SCO-spondin-like			GO:0005509	calcium ion binding	GO:0005576|GO:0016021	extracellular region|integral component of membrane
6087_0:002219	LOC100205981	100205981	protein_coding	3.16829	441	1	5.9859	0.350673				XP_012558233.1	LOC100205981		100205981	uncharacterized protein LOC100205981					GO:0016021	integral component of membrane
6087_0:00127d	LOC100200426	100200426	protein_coding	3.15342	442	1	6.02779	0.279049	eukaryotic translation initiation factor 3 subunit A-like(LOC100200426)	hmg03013:RNA transport,	IPR000717:Proteasome component (PCI) domain,IPR027512:Eukaryotic translation initiation factor 3 subunit A,	XP_012555080.1	EIF3A	T2MDT9	100200426	Eukaryotic translation initiation factor 3 subunit A	GO:0002188|GO:0001732|GO:0002183|GO:0001731|GO:0006446	translation reinitiation|formation of cytoplasmic translation initiation complex|cytoplasmic translational initiation|formation of translation preinitiation complex|regulation of translational initiation	GO:0003729	mRNA binding	GO:0043614|GO:0005852|GO:0071541|GO:0071540|GO:0005737|GO:0016282	multi-eIF complex|eukaryotic translation initiation factor 3 complex|eukaryotic translation initiation factor 3 complex, eIF3m|eukaryotic translation initiation factor 3 complex, eIF3e|cytoplasm|eukaryotic 43S preinitiation complex
	LOC101236142	101236142	lncRNA	3.15257	443	2	4.65039	1.65474
6087_0:00475f	LOC101236912	101236912	protein_coding	3.13417	444	1	6.26835	0				XP_004212503.2	LOC101236912		101236912	matrix metalloproteinase-14-like	GO:0006508	proteolysis	GO:0008237|GO:0004222|GO:0046872|GO:0008270|GO:0008233|GO:0016787	metallopeptidase activity|metalloendopeptidase activity|metal ion binding|zinc ion binding|peptidase activity|hydrolase activity
6087_0:004409	LOC100202388	100202388	protein_coding	3.13078	445	1	6.22175	0.0398134				XP_004212135.1	LOC100202388		100202388	protocadherin Fat 4-like	GO:0007156	homophilic cell adhesion via plasma membrane adhesion molecules	GO:0005509	calcium ion binding	GO:0016021|GO:0016020	integral component of membrane|membrane
	LOC105849969	105849969	lncRNA	3.12903	446.5	1	6.25806	0
	LOC105850755	105850755	lncRNA	3.12903	446.5	1	6.25806	0
6087_0:002d8c	LOC100210455	100210455	protein_coding	3.12371	448	2	5.16671	1.08072	RNA polymerase II elongation factor ELL-like(LOC100210455)		IPR010844:Occludin/RNA polymerase II elongation factor, ELL domain,IPR011991:Winged helix-turn-helix DNA-binding domain,IPR019464:RNA polymerase II elongation factor ELL,	XP_012560538.1	ELL	T2MF20	100210455	RNA polymerase II elongation factor ELL	GO:0006368|GO:0042795	transcription elongation from RNA polymerase II promoter|snRNA transcription by RNA polymerase II			GO:0008023	transcription elongation factor complex
6087_0:000d64	LOC100199148	100199148	protein_coding	3.11559	449	2	5.41191	0.819271	cathepsin B-like(LOC100199148)	hmg04142:Lysosome,	IPR000169:Cysteine peptidase, cysteine active site,IPR000668:Peptidase C1A, papain C-terminal,IPR012599:Peptidase C1A, propeptide,IPR013128:Peptidase C1A, papain,IPR025660:Cysteine peptidase, histidine active site,IPR025661:Cysteine peptidase, asparagine active site,	XP_002166962.2	CTSB	T2MGS4	100199148	Cathepsin B	GO:0006508|GO:0051603	proteolysis|proteolysis involved in cellular protein catabolic process	GO:0004197	cysteine-type endopeptidase activity	GO:0005615|GO:0005764	extracellular space|lysosome
6087_0:0006b8	kazal3		protein_coding	3.10029	450	1	5.8958	0.304778				NP_001267782.1	kazal3	B8Y8I6	100199459	Kazal-type serine protease inihibitor 3
6087_0:004e38	ND3		protein_coding	3.09742	451	1	6.19485	0				YP_002221533.1	ND3	B4F7M9	6904242	NADH-ubiquinone oxidoreductase chain 3	GO:0055114	NA	GO:0016651|GO:0008137|GO:0016491	oxidoreductase activity, acting on NAD(P)H|NADH dehydrogenase (ubiquinone) activity|oxidoreductase activity	GO:0016021|GO:0005739|GO:0016020|GO:0031966|GO:0070469	integral component of membrane|mitochondrion|membrane|mitochondrial membrane|respirasome
	LOC105850316	105850316	lncRNA	3.09166	452	1	6.18333	0
6087_0:001f59	LOC100210162	100210162	protein_coding	3.08277	453	2	5.0098	1.15574	coronin-6-like(LOC100210162)		IPR001680:WD40 repeat,IPR015048:Domain of unknown function DUF1899,IPR015505:Coronin,IPR015943:WD40/YVTN repeat-like-containing domain,IPR017986:WD40-repeat-containing domain,IPR019775:WD40 repeat, conserved site,	XP_004208361.1	CORO6	T2MBA8	100210162	Coronin	GO:0030036	actin cytoskeleton organization	GO:0051015	actin filament binding	GO:0015629	actin cytoskeleton
6087_0:00439b	LOC100198918	100198918	protein_coding	3.08155	454	2	5.19951	0.96359				XP_004212080.2	LOC100198918		100198918	T-complex protein 1 subunit epsilon	GO:0061077|GO:0006458	chaperone-mediated protein folding|'de novo' protein folding	GO:0051082|GO:0005524|GO:0044183|GO:0000166	unfolded protein binding|ATP binding|protein folding chaperone|nucleotide binding	GO:0005832|GO:0005737	chaperonin-containing T-complex|cytoplasm
6087_0:0006cb	LOC101237716	101237716	protein_coding	3.078	455	1	6.156	0				XP_012564591.1	LOC101237716		101237716	ATP-dependent RNA helicase DED1-like
6087_0:003fd6	LOC105848518	105848518	protein_coding	3.07226	456	1	6.14453	0				XP_012564101.1	LOC105848518		105848518	uncharacterized protein LOC105848518					GO:0016020|GO:0016021|GO:0005783	membrane|integral component of membrane|endoplasmic reticulum
6087_0:000598	LOC100208703	100208703	protein_coding	3.06854	457	2	5.22139	0.915696				NP_001267798.1	LOC100208703	G7H7W5	100208703	Minicollagen 12
	LOC105850011	105850011	lncRNA	3.03895	458	2	4.93918	1.13872
	LOC101240520	101240520	lncRNA	3.03541	459	1	6.07083	0
6087_0:0033b1	LOC105847027	105847027	protein_coding	3.03114	460	2	5.61497	0.447309				XP_012561749.1	LOC105847027		105847027	EGF-like module-containing mucin-like hormone receptor-like 1			GO:0005509	calcium ion binding
6087_0:001432	LOC100192289	100192289	protein_coding	2.98892	461	2	4.56301	1.41483	glyceraldehyde-3-phosphate dehydrogenase(LOC100192289)	hmg00010:Glycolysis / Gluconeogenesis,hmg01100:Metabolic pathways,hmg01130:Biosynthesis of antibiotics,hmg01200:Carbon metabolism,hmg01230:Biosynthesis of amino acids,	IPR006424:Glyceraldehyde-3-phosphate dehydrogenase, type I,IPR016040:NAD(P)-binding domain,IPR020828:Glyceraldehyde 3-phosphate dehydrogenase, NAD(P) binding domain,IPR020829:Glyceraldehyde 3-phosphate dehydrogenase, catalytic domain,IPR020830:Glyceraldehyde 3-phosphate dehydrogenase, active site,IPR020831:Glyceraldehyde/Erythrose phosphate dehydrogenase family,	XP_012555426.1	GAPDH	T2MHW1	100192289	Glyceraldehyde-3-phosphate dehydrogenase	GO:0006006|GO:0055114	glucose metabolic process|NA	GO:0050661|GO:0004365|GO:0016620|GO:0016491	NADP binding|glyceraldehyde-3-phosphate dehydrogenase (NAD+) (phosphorylating) activity|oxidoreductase activity, acting on the aldehyde or oxo group of donors, NAD or NADP as acceptor|oxidoreductase activity
6087_0:0037ab	LOC100199632	100199632	protein_coding	2.98237	462	2	4.83444	1.1303				XP_002165566.1	LOC100199632		100199632	uncharacterized protein LOC100199632	GO:0006508|GO:0051919|GO:0031639	proteolysis|positive regulation of fibrinolysis|plasminogen activation	GO:0004252	serine-type endopeptidase activity	GO:0005615	extracellular space
6087_0:000cd3	LOC101237052	101237052	protein_coding	2.98039	463	1	5.80202	0.158752				XP_012553892.1	LOC101237052		101237052	fat-like cadherin-related tumor suppressor homolog	GO:0007156	homophilic cell adhesion via plasma membrane adhesion molecules	GO:0005509	calcium ion binding	GO:0016020|GO:0016021	membrane|integral component of membrane
6087_0:0039ee	LOC101238813	101238813	protein_coding	2.96256	464	1	5.52517	0.399957				XP_004211055.1	LOC101238813		101238813	prosaposin-like	GO:0006629|GO:0006665	lipid metabolic process|sphingolipid metabolic process	GO:0001664	G protein-coupled receptor binding	GO:0005764|GO:0005737	lysosome|cytoplasm
6087_0:001499	LOC100210073	100210073	protein_coding	2.94421	465	2	4.96113	0.92729	probable citrate synthase 2, mitochondrial(LOC100210073)	hmg00020:Citrate cycle (TCA cycle),hmg00630:Glyoxylate and dicarboxylate metabolism,hmg01100:Metabolic pathways,hmg01130:Biosynthesis of antibiotics,hmg01200:Carbon metabolism,hmg01210:2-Oxocarboxylic acid metabolism,hmg01230:Biosynthesis of amino acids,	IPR002020:Citrate synthase-like,IPR010109:Citrate synthase, eukaryotic,IPR016142:Citrate synthase-like, large alpha subdomain,IPR019810:Citrate synthase active site,	XP_012555512.1	CS	T2MHN7	100210073	Citrate synthase	GO:0006099|GO:0006101	tricarboxylic acid cycle|citrate metabolic process	GO:0046912|GO:0016740|GO:0004108	transferase activity, transferring acyl groups, acyl groups converted into alkyl on transfer|transferase activity|citrate (Si)-synthase activity
6087_0:000e96	LOC100205023	100205023	protein_coding	2.94282	466	2	5.19639	0.689251				XP_002156388.1	LOC100205023		100205023	uncharacterized protein LOC100205023			GO:0004859	phospholipase inhibitor activity	GO:0005576	extracellular region
6087_0:004670	LOC100209774	100209774	protein_coding	2.93904	467	1	5.58205	0.296022				XP_002159184.2	LOC100209774		100209774	chymotrypsin-like elastase family member 3B	GO:0006508	proteolysis	GO:0004252|GO:0008236|GO:0016787|GO:0008233	serine-type endopeptidase activity|serine-type peptidase activity|hydrolase activity|peptidase activity
6087_0:000bd6	LOC100212376	100212376	protein_coding	2.93613	468	2	5.32331	0.548942	importin subunit alpha-3-like(LOC100212376)		IPR000225:Armadillo,IPR002652:Importin-alpha, importin-beta-binding domain,IPR011989:Armadillo-like helical,IPR016024:Armadillo-type fold,IPR024931:Importin subunit alpha,	NP_001274313.1	KPNA3	Q71VM5	100212376	Importin subunit alpha	GO:0006606|GO:0006607	protein import into nucleus|NLS-bearing protein import into nucleus	GO:0061608|GO:0005488|GO:0008139	nuclear import signal receptor activity|binding|nuclear localization sequence binding	GO:0005634|GO:0005737|GO:0005654|GO:0005829	nucleus|cytoplasm|nucleoplasm|cytosol
6087_0:000e13	LOC100192263	100192263	protein_coding	2.93465	469	2	4.7299	1.13939	protein SET(LOC100192263)		IPR002164:Nucleosome assembly protein (NAP),	XP_002161590.2	SET	T2ME84	100192263	Protein SET	GO:0006334	nucleosome assembly			GO:0005634	nucleus
6087_0:001091	LOC100211215	100211215	protein_coding	2.9293	470	2	3.11216	2.74644	cAMP-dependent protein kinase type II regulatory subunit-like(LOC100211215)		IPR000595:Cyclic nucleotide-binding domain,IPR003117:cAMP-dependent protein kinase, regulatory subunit, type I/II alpha/beta,IPR012198:cAMP-dependent protein kinase regulatory subunit,IPR014710:RmlC-like jelly roll fold,IPR018488:Cyclic nucleotide-binding, conserved site,IPR018490:Cyclic nucleotide-binding-like,	XP_012554671.1	PRKAR2B	T2MGQ3	100211215	cAMP-dependent protein kinase type II-beta regulatory subunit	GO:0045859|GO:0001932|GO:2000480	regulation of protein kinase activity|regulation of protein phosphorylation|negative regulation of cAMP-dependent protein kinase activity	GO:0008603|GO:0000166|GO:0030552|GO:0004862|GO:0034236|GO:0031625	cAMP-dependent protein kinase regulator activity|nucleotide binding|cAMP binding|cAMP-dependent protein kinase inhibitor activity|protein kinase A catalytic subunit binding|ubiquitin protein ligase binding	GO:0005952|GO:0005737|GO:0005813	cAMP-dependent protein kinase complex|cytoplasm|centrosome
6087_0:0017ea	LOC100198371	100198371	protein_coding	2.92914	471	2	4.68124	1.17703				XP_002165748.3	LOC100198371		100198371	dnaJ homolog subfamily A member 2-like			GO:0031072|GO:0046872|GO:0051082|GO:0005524	heat shock protein binding|metal ion binding|unfolded protein binding|ATP binding	GO:0005829	cytosol
6087_0:002e85	LOC100215286	100215286	protein_coding	2.92813	472	1	5.85626	0				XP_012560736.1	LOC100215286		100215286	collagen alpha-6(VI) chain-like					GO:0005576|GO:0005578	extracellular region|NA
6087_0:0021e0	LOC105845228	105845228	protein_coding	2.92773	473	1	5.55651	0.298945				XP_012558188.1	LOC105845228		105845228	protein PRRC2C-like					GO:0005829	cytosol
	trnal-aag		tRNA	2.92503	474	1	5.85005	0
6087_0:00168d	LOC100212720	100212720	protein_coding	2.92354	475	2	5.07222	0.774855	RNA-binding motif protein, X chromosome-like(LOC100212720)	hmg03040:Spliceosome,		XP_012555908.1	LOC100212720		100212720	RNA-binding motif protein, X chromosome-like			GO:0003676	nucleic acid binding
	LOC105850298	105850298	lncRNA	2.92332	476	1	5.84664	0
	LOC105845758	105845758	lncRNA	2.92026	477	1	5.84051	0
6087_0:00364f	nb039b		protein_coding	2.89985	478	2	5.36315	0.436561				XP_012562283.1	nb039b		100213241	protein diaphanous homolog 1 isoform X1
6087_0:0007ea	LOC100211499	100211499	protein_coding	2.89637	479	1	5.40175	0.390989				XP_002155888.1	LOC100211499		100211499	cystatin-like
6087_0:00180d	LOC100203447	100203447	protein_coding	2.89251	480	2	5.31451	0.47052	bcl-2-like protein 1-like(LOC100203447)	hmg04630:Jak-STAT signaling pathway,	IPR002475:Bcl2-like,IPR020726:Apoptosis regulator, Bcl-2, BH2 motif, conserved site,IPR026298:Blc2 family,	NP_001274712.1	BCL2L1	A7LM80	100203447	Bcl-2-like 4	GO:0097192|GO:0008630|GO:0042981	extrinsic apoptotic signaling pathway in absence of ligand|intrinsic apoptotic signaling pathway in response to DNA damage|regulation of apoptotic process	GO:0042802|GO:0046982|GO:0042803	identical protein binding|protein heterodimerization activity|protein homodimerization activity	GO:0016020|GO:0005829|GO:0005739|GO:0005741	membrane|cytosol|mitochondrion|mitochondrial outer membrane
6087_0:001055	LOC100209068	100209068	protein_coding	2.89183	481	2	5.10738	0.676288				XP_002160378.3	LOC100209068		100209068	microtubule-actin cross-linking factor 1-like			GO:0008017|GO:0003779|GO:0005509	microtubule binding|actin binding|calcium ion binding	GO:0005856	cytoskeleton
6087_0:00083e	LOC100212724	100212724	protein_coding	2.88708	482	1	5.3822	0.391954	staphylococcal nuclease domain-containing protein 1-like(LOC100212724)		IPR002999:Tudor domain,IPR016071:Staphylococcal nuclease (SNase-like), OB-fold,IPR016685:RNA-induced silencing complex, nuclease component Tudor-SN,	XP_002163890.1	SND1	T2MAB0	100212724	Staphylococcal nuclease domain-containing protein 1	GO:0031047|GO:0006401	gene silencing by RNA|RNA catabolic process	GO:0004518	nuclease activity	GO:0016442|GO:0005829|GO:0005634|GO:0005737	RISC complex|cytosol|nucleus|cytoplasm
	LOC100214985	100214985	lncRNA	2.87878	483	1	5.75755	0
	LOC105847762	105847762	lncRNA	2.86959	484	1	5.73919	0
6087_0:0004b5	LOC100206267	100206267	protein_coding	2.86773	485	2	3.47904	2.25642				XP_012560561.1	LOC100206267		100206267	sodium/potassium-transporting ATPase subunit beta-1-like					GO:0016021|GO:0016020|GO:0005890	integral component of membrane|membrane|sodium:potassium-exchanging ATPase complex
6087_0:004795	LOC100204251	100204251	protein_coding	2.86073	486	2	4.99812	0.72334				XP_002158301.1	LOC100204251		100204251	glutathione S-transferase-like
6087_0:002919	LOC101237731	101237731	protein_coding	2.84314	487	2	1.87449	3.81179				XP_012559648.1	LOC101237731		101237731	uncharacterized protein LOC101237731
6087_0:0027c1	LOC100205844	100205844	protein_coding	2.83863	488	2	4.15115	1.52611				XP_012559382.1	LOC100205844		100205844	heterogeneous nuclear ribonucleoprotein A0-like			GO:0003676	nucleic acid binding
6087_0:002a78	LOC100206128	100206128	protein_coding	2.83382	489	2	4.81686	0.850788				XP_002166403.1	LOC100206128		100206128	high choriolytic enzyme 1-like	GO:0006508	proteolysis	GO:0008270|GO:0008237|GO:0004222	zinc ion binding|metallopeptidase activity|metalloendopeptidase activity
6087_0:002610	LOC100209607	100209607	protein_coding	2.83249	490	2	5.12188	0.543108				XP_002163081.1	LOC100209607		100209607	uncharacterized protein LOC100209607
6087_0:0030df	LOC100207645	100207645	protein_coding	2.82785	491	2	5.07716	0.578543				XP_002165049.2	LOC100207645		100207645	actin-interacting protein 1-like	GO:0030834|GO:0051016|GO:0030042|GO:0040011	regulation of actin filament depolymerization|barbed-end actin filament capping|actin filament depolymerization|locomotion	GO:0003779|GO:0051015	actin binding|actin filament binding	GO:0005884|GO:0030864|GO:0042643	actin filament|cortical actin cytoskeleton|NA
6087_0:0028bd	LOC100212826	100212826	protein_coding	2.82344	492	1	5.55009	0.0967974	collagen alpha-1(III) chain-like(LOC100212826)		IPR000885:Fibrillar collagen, C-terminal,IPR008160:Collagen triple helix repeat,	XP_002161962.3	COL2A1	T2MHX9	100212826	Collagen alpha-1(II) chain			GO:0005201	extracellular matrix structural constituent
6087_0:003f72	LOC100211661	100211661	protein_coding	2.80785	493	2	4.32621	1.28949	GTP-binding nuclear protein Ran-like(LOC100211661)	hmg03008:Ribosome biogenesis in eukaryotes,hmg03013:RNA transport,	IPR001806:Small GTPase superfamily,IPR002041:Ran GTPase,IPR005225:Small GTP-binding protein domain,IPR027417:P-loop containing nucleoside triphosphate hydrolase,	XP_002166677.1	RAN	T2ME54	100211661	GTP-binding nuclear protein	GO:0000054|GO:0006606	ribosomal subunit export from nucleus|protein import into nucleus	GO:0003924|GO:0000166|GO:0005525	GTPase activity|nucleotide binding|GTP binding	GO:0005634|GO:0005737	nucleus|cytoplasm
6087_0:00224b	LOC100213141	100213141	protein_coding	2.80613	494	2	4.05129	1.56097	ribosome biogenesis protein NSA2 homolog(LOC100213141)		IPR022309:Ribosomal protein S8e/ribosomal biogenesis NSA2,	XP_002157278.1	NSA2	T2MHP7	100213141	Ribosome biogenesis protein NSA2 homolog	GO:0000463|GO:0000466|GO:0042273|GO:0000460|GO:0000470	maturation of LSU-rRNA from tricistronic rRNA transcript (SSU-rRNA, 5.8S rRNA, LSU-rRNA)|maturation of 5.8S rRNA from tricistronic rRNA transcript (SSU-rRNA, 5.8S rRNA, LSU-rRNA)|ribosomal large subunit biogenesis|maturation of 5.8S rRNA|maturation of LSU-rRNA			GO:0030687|GO:0005634|GO:0005730	preribosome, large subunit precursor|nucleus|nucleolus
6087_0:0007c1	LOC101238260	101238260	protein_coding	2.80138	495	1	5.60277	0				XP_004206102.1	LOC101238260		101238260	proline-rich nuclear receptor coactivator 2-like
6087_0:001e9d	LOC100204678	100204678	protein_coding	2.79257	496	2	3.85682	1.72831	nuclear inhibitor of protein phosphatase 1-like(LOC100204678)		IPR000253:Forkhead-associated (FHA) domain,IPR008984:SMAD/FHA domain,	XP_002162233.1	PPP1R8	T2MDP6	100204678	Nuclear inhibitor of protein phosphatase 1	GO:0008283|GO:0035308	cell population proliferation|negative regulation of protein dephosphorylation	GO:0003729|GO:0004865	mRNA binding|protein serine/threonine phosphatase inhibitor activity	GO:0016607|GO:0005654	nuclear speck|nucleoplasm
6087_0:000b93	LOC100203582	100203582	protein_coding	2.78464	497	2	4.46563	1.10366	lysosomal aspartic protease-like(LOC100203582)	hmg04142:Lysosome,		XP_002161366.2	LOC100203582		100203582	lysosomal aspartic protease-like	GO:0006508	proteolysis	GO:0004190|GO:0016787|GO:0008233	aspartic-type endopeptidase activity|hydrolase activity|peptidase activity	GO:0005764	lysosome
6087_0:004798	LOC100208201	100208201	protein_coding	2.78317	498	1	5.174	0.392342				XP_002159291.2	LOC100208201		100208201	uncharacterized protein LOC100208201
	LOC105846473	105846473	lncRNA	2.78139	499	1	5.56279	0
6087_0:004a0f	LOC105850057	105850057	protein_coding	2.76755	500	2	2.65439	2.8807				XP_012565994.1	LOC105850057		105850057	cystatin-A-like	GO:0010951	negative regulation of endopeptidase activity	GO:0004866	endopeptidase inhibitor activity	GO:0005622	intracellular anatomical structure
6087_0:0021de	LOC100215593	100215593	protein_coding	2.76219	501	1	5.28125	0.243126				XP_012558189.1	LOC100215593		100215593	protein PRRC2C-like					GO:0005829	cytosol
	LOC105850669	105850669	lncRNA	2.7503	502	1	5.5006	0
6087_0:0000e3	LOC101239539	101239539	protein_coding	2.74992	503	2	4.45498	1.04486				XP_004205505.1	LOC101239539		101239539	uncharacterized protein LOC101239539	GO:0015074	DNA integration	GO:0003676	nucleic acid binding
6087_0:003993	LOC100206850	100206850	protein_coding	2.73175	504	2	4.93849	0.525005				XP_002160864.1	LOC100206850		100206850	uncharacterized protein LOC100206850
	LOC105847447	105847447	lncRNA	2.7314	505	1	5.4628	0
6087_0:0014eb	LOC100206595	100206595	protein_coding	2.73006	506	2	4.50319	0.95693				XP_002154611.2	LOC100206595		100206595	uncharacterized protein LOC100206595
6087_0:004e01	LOC100212403	100212403	protein_coding	2.72761	507	1	5.45521	0				XP_002160534.3	LOC100212403		100212403	golgin subfamily A member 6-like protein 1
6087_0:000edc	LOC100210869	100210869	protein_coding	2.72503	508	2	4.93596	0.514097	T-complex protein 1 subunit eta-like(LOC100210869)		IPR002194:Chaperonin TCP-1, conserved site,IPR002423:Chaperonin Cpn60/TCP-1,IPR012720:T-complex protein 1, eta subunit,IPR017998:Chaperone tailless complex polypeptide 1 (TCP-1),IPR027409:GroEL-like apical domain,IPR027410:TCP-1-like chaperonin intermediate domain,IPR027413:GroEL-like equatorial domain,	XP_002155383.1	CCT7	T2M6L6	100210869	T-complex protein 1 subunit eta	GO:0061077|GO:0006458	chaperone-mediated protein folding|'de novo' protein folding	GO:0044183|GO:0051082|GO:0005524|GO:0000166	protein folding chaperone|unfolded protein binding|ATP binding|nucleotide binding	GO:0005832|GO:0005737	chaperonin-containing T-complex|cytoplasm
6087_0:0014a2	LOC100215507	100215507	protein_coding	2.72283	509	2	3.89508	1.55058				XP_002166534.1	LOC100215507		100215507	calcyphosin-like protein			GO:0005509	calcium ion binding
6087_0:0014d3	LOC100209701	100209701	protein_coding	2.71527	510	1	5.43053	0	ATP synthase subunit gamma, mitochondrial-like(LOC100209701)	hmg00190:Oxidative phosphorylation,hmg01100:Metabolic pathways,		XP_002167247.1	LOC100209701		100209701	ATP synthase subunit gamma, mitochondrial-like	GO:0015986|GO:0099132|GO:0006811	ATP synthesis coupled proton transport|NA|ion transport	GO:0046933|GO:0046961	proton-transporting ATP synthase activity, rotational mechanism|proton-transporting ATPase activity, rotational mechanism	GO:0045261	proton-transporting ATP synthase complex, catalytic core F(1)
6087_0:004389	LOC100209605	100209605	protein_coding	2.70797	511	2	3.87871	1.53724				XP_002159008.3	LOC100209605		100209605	histone H1-delta-like	GO:0006334	nucleosome assembly			GO:0005694|GO:0005634	chromosome|nucleus
6087_0:003591	LOC100211938	100211938	protein_coding	2.70632	512	2	4.91682	0.495825	propionyl-CoA carboxylase beta chain, mitochondrial(LOC100211938)	hmg00280:Valine, leucine and isoleucine degradation,hmg00630:Glyoxylate and dicarboxylate metabolism,hmg00640:Propanoate metabolism,hmg01100:Metabolic pathways,hmg01130:Biosynthesis of antibiotics,hmg01200:Carbon metabolism,	IPR000022:Carboxyl transferase,IPR011762:Acetyl-coenzyme A carboxyltransferase, N-terminal,IPR011763:Acetyl-coenzyme A carboxyltransferase, C-terminal,	XP_002157357.1	PCCB	T2MHD2	100211938	Propionyl-CoA carboxylase beta chain, mitochondrial	GO:0009062	fatty acid catabolic process	GO:0016874|GO:0016421	ligase activity|CoA carboxylase activity	GO:0005739	mitochondrion
6087_0:0016c7	LOC105844185	105844185	protein_coding	2.70426	513	2	4.97562	0.432903				XP_012555958.1	LOC105844185		105844185	myosin-2 heavy chain-like
6087_0:001a7e	LOC100214022	100214022	protein_coding	2.70209	514	2	4.98376	0.420418				XP_012556685.1	LOC100214022		100214022	zinc finger MYM-type protein 1-like			GO:0003676|GO:0046983|GO:0005509	nucleic acid binding|protein dimerization activity|calcium ion binding
6087_0:00072a	LOC101238737	101238737	protein_coding	2.69925	515	2	3.85603	1.54247	death-associated protein 1-like(LOC101238737)		IPR024130:DAP1/DAPL1,	XP_012565214.1	DAP	T2MEV3	101238737	Death-associated protein 1	GO:0010507|GO:0034198	negative regulation of autophagy|cellular response to amino acid starvation	GO:0070513	death domain binding
6087_0:000eb4	LOC100204109	100204109	protein_coding	2.69848	516	2	4.74977	0.6472	high mobility group-T protein-like(LOC100204109)		IPR009071:High mobility group (HMG) box domain,	XP_002166637.1	HMGB3	I3V7W5	100204109	High mobility group protein B3			GO:0008301	DNA binding, bending	GO:0005634	nucleus
6087_0:004de9	LOC105850780	105850780	protein_coding	2.68612	517	1	5.37224	0				XP_012566653.1	LOC105850780		105850780	uncharacterized protein LOC105850780
6087_0:0021dd	LOC105845227	105845227	protein_coding	2.66208	518	2	4.88392	0.440248				XP_012558187.1	LOC105845227		105845227	uncharacterized protein LOC105845227
6087_0:002560	LOC100206735	100206735	protein_coding	2.65829	519	2	4.43616	0.88042				XP_002167620.1	LOC100206735		100206735	calpain-9-like	GO:0006508	proteolysis	GO:0005509|GO:0004198|GO:0016787|GO:0008233	calcium ion binding|calcium-dependent cysteine-type endopeptidase activity|hydrolase activity|peptidase activity	GO:0005737|GO:0005622	cytoplasm|intracellular anatomical structure
6087_0:000ad0	LOC100211947	100211947	protein_coding	2.65143	520	2	4.0216	1.28125				XP_002155400.2	LOC100211947		100211947	uncharacterized protein LOC100211947
6087_0:002f2d	LOC100202475	100202475	protein_coding	2.64248	521	2	3.81945	1.4655	ras-related protein Rab-7a-like(LOC100202475)	hmg04144:Endocytosis,hmg04145:Phagosome,	IPR001806:Small GTPase superfamily,IPR005225:Small GTP-binding protein domain,IPR027417:P-loop containing nucleoside triphosphate hydrolase,	XP_002160165.2	RAB7A	T2MFR8	100202475	Ras-related protein Rab-7a			GO:0005525|GO:0003924	GTP binding|GTPase activity	GO:0045335	phagocytic vesicle
	LOC105850221	105850221	lncRNA	2.62922	522	1	5.25845	0
6087_0:003ca5	LOC100207558	100207558	protein_coding	2.62546	523	2	3.80054	1.45037	heme-binding protein 1-like(LOC100207558)		IPR006917:SOUL haem-binding protein,IPR011256:Regulatory factor, effector, bacterial,	XP_002158212.1	HEBP1	T2M5D1	100207558	Heme-binding protein 1	GO:0010940|GO:0035794|GO:0010917	positive regulation of necrotic cell death|positive regulation of mitochondrial membrane permeability|negative regulation of mitochondrial membrane potential			GO:0005737|GO:0005739	cytoplasm|mitochondrion
	LOC105850924	105850924	lncRNA	2.61449	524	1	5.22897	0
	LOC101240662	101240662	lncRNA	2.60873	525	1	5.21746	0
6087_0:000821	LOC101239931	101239931	protein_coding	2.60857	526	2	4.62768	0.589454				XP_004206133.1	LOC101239931		101239931	uncharacterized protein LOC101239931 isoform X1
6087_0:000bef	LOC100214049	100214049	protein_coding	2.59296	527	1	5.18593	0				XP_002164280.2	LOC100214049		100214049	zinc metalloproteinase nas-14-like	GO:0006508	proteolysis	GO:0008270|GO:0008237|GO:0004222	zinc ion binding|metallopeptidase activity|metalloendopeptidase activity
	LOC105844683	105844683	lncRNA	2.58982	528	1	5.17963	0
	LOC105847395	105847395	lncRNA	2.58913	529	1	5.17825	0
6087_0:00409d	LOC105848618	105848618	protein_coding	2.57617	530	2	4.69156	0.46078				XP_012564248.1	LOC105848618		105848618	uncharacterized protein LOC105848618	GO:0006281|GO:0000723|GO:0032508|GO:0006310	DNA repair|telomere maintenance|DNA duplex unwinding|DNA recombination	GO:0005524|GO:0016787|GO:0004386|GO:0000166	ATP binding|hydrolase activity|helicase activity|nucleotide binding
6087_0:0040fd	LOC100215404	100215404	protein_coding	2.56824	531	2	3.92403	1.21244	alpha-enolase-like(LOC100215404)	hmg00010:Glycolysis / Gluconeogenesis,hmg01100:Metabolic pathways,hmg01130:Biosynthesis of antibiotics,hmg01200:Carbon metabolism,hmg01230:Biosynthesis of amino acids,hmg03018:RNA degradation,	IPR000941:Enolase,IPR020809:Enolase, conserved site,IPR020810:Enolase, C-terminal,IPR020811:Enolase, N-terminal,	XP_012564321.1	ENO1	T2MHB9	100215404	Alpha-enolase			GO:0046872|GO:0000287|GO:0004634	metal ion binding|magnesium ion binding|phosphopyruvate hydratase activity	GO:0000015|GO:0005829	phosphopyruvate hydratase complex|cytosol
6087_0:001e4f	LOC100213484	100213484	protein_coding	2.56695	532	1	4.88746	0.24643	T-complex protein 1 subunit delta-like(LOC100213484)		IPR002194:Chaperonin TCP-1, conserved site,IPR002423:Chaperonin Cpn60/TCP-1,IPR012717:T-complex protein 1, delta subunit,IPR017998:Chaperone tailless complex polypeptide 1 (TCP-1),IPR027409:GroEL-like apical domain,IPR027410:TCP-1-like chaperonin intermediate domain,IPR027413:GroEL-like equatorial domain,	XP_002158891.1	CCT4	T2MFW8	100213484	T-complex protein 1 subunit delta	GO:0006458|GO:0061077	'de novo' protein folding|chaperone-mediated protein folding	GO:0051082|GO:0044183|GO:0005524|GO:0000166	unfolded protein binding|protein folding chaperone|ATP binding|nucleotide binding	GO:0005832|GO:0005737	chaperonin-containing T-complex|cytoplasm
6087_0:00392a	LOC100209491	100209491	protein_coding	2.56347	533	2	2.49509	2.63185	lipopolysaccharide-induced tumor necrosis factor-alpha factor homolog(LOC100209491)	hmg04142:Lysosome,		XP_002158359.1	LOC100209491		100209491	lipopolysaccharide-induced tumor necrosis factor-alpha factor homolog					GO:0016021	integral component of membrane
6087_0:003918	LOC100213311	100213311	protein_coding	2.56325	534	1	5.12651	0				XP_012562823.1	LOC100213311		100213311	serine-arginine protein 55-like
6087_0:00314e	LOC101234945	101234945	protein_coding	2.55951	535	1	5.11902	0				XP_012561286.1	LOC101234945		101234945	ATP-dependent DNA helicase PIF1-like	GO:0006281|GO:0000723|GO:0032508|GO:0006310	DNA repair|telomere maintenance|DNA duplex unwinding|DNA recombination	GO:0005524|GO:0016787|GO:0004386|GO:0000166	ATP binding|hydrolase activity|helicase activity|nucleotide binding
	LOC105848805	105848805	lncRNA	2.55708	536	1	5.11416	0
	LOC105849850	105849850	lncRNA	2.55617	537	1	5.11234	0
6087_0:0013e2	LOC100211398	100211398	protein_coding	2.55072	538	2	3.94929	1.15215	T-complex protein 1 subunit zeta-like(LOC100211398)		IPR002194:Chaperonin TCP-1, conserved site,IPR002423:Chaperonin Cpn60/TCP-1,IPR012722:T-complex protein 1, zeta subunit,IPR017998:Chaperone tailless complex polypeptide 1 (TCP-1),IPR027409:GroEL-like apical domain,IPR027410:TCP-1-like chaperonin intermediate domain,IPR027413:GroEL-like equatorial domain,	XP_002164988.1	CCT6A	T2MFY4	100211398	T-complex protein 1 subunit zeta	GO:0061077|GO:0006458	chaperone-mediated protein folding|'de novo' protein folding	GO:0005524|GO:0051082|GO:0044183|GO:0000166	ATP binding|unfolded protein binding|protein folding chaperone|nucleotide binding	GO:0005832|GO:0005737	chaperonin-containing T-complex|cytoplasm
6087_0:000609	LOC100199698	100199698	protein_coding	2.54602	539	2	3.84328	1.24876	transcriptional regulator ERG-like(LOC100199698)		IPR000418:Ets domain,IPR003118:Pointed domain,IPR011991:Winged helix-turn-helix DNA-binding domain,IPR013761:Sterile alpha motif/pointed domain,	XP_012563171.1	LOC100199698	I3V7X0	100199698	Transcription factor Ets1	GO:0030154	cell differentiation	GO:0043565|GO:0000978|GO:0003682	sequence-specific DNA binding|RNA polymerase II cis-regulatory region sequence-specific DNA binding|chromatin binding	GO:0005634	nucleus
6087_0:0010ce	LOC100208233	100208233	protein_coding	2.54562	540	2	4.39028	0.700961				XP_002154090.1	LOC100208233		100208233	disintegrin and metalloproteinase domain-containing protein 10-like	GO:0006508|GO:0006509	proteolysis|membrane protein ectodomain proteolysis	GO:0046872|GO:0004222|GO:0008237	metal ion binding|metalloendopeptidase activity|metallopeptidase activity	GO:0016020|GO:0016021	membrane|integral component of membrane
6087_0:002917	LOC100208683	100208683	protein_coding	2.54415	541	1	4.89384	0.194452				XP_002164733.1	LOC100208683		100208683	uncharacterized protein LOC100208683
6087_0:000e3e	LOC100203250	100203250	protein_coding	2.53984	542	2	3.85057	1.22911				XP_012554193.1	LOC100203250		100203250	ATPase inhibitor A, mitochondrial-like	GO:0032780	negative regulation of ATPase activity	GO:0042030	ATPase inhibitor activity	GO:0005739	mitochondrion
6087_0:002545	LOC100204283	100204283	protein_coding	2.53535	543	2	4.23016	0.840536				XP_012558892.1	LOC100204283		100204283	glutamic acid-rich protein-like isoform X1
6087_0:0022ce	LOC100192291	100192291	protein_coding	2.53099	544	2	4.4054	0.656572				XP_002154528.3	LOC100192291		100192291	guanine nucleotide-binding protein G(s) subunit alpha	GO:0007188	adenylate cyclase-modulating G protein-coupled receptor signaling pathway	GO:0019001|GO:0001664|GO:0005525|GO:0003924|GO:0031683|GO:0000166	guanyl nucleotide binding|G protein-coupled receptor binding|GTP binding|GTPase activity|G-protein beta/gamma-subunit complex binding|nucleotide binding	GO:0005834	heterotrimeric G-protein complex
	LOC105847654	105847654	lncRNA	2.53056	545	1	5.06112	0
6087_0:004ba9	LOC101236566	101236566	protein_coding	2.49823	546	1	4.99646	0				XP_004213035.1	LOC101236566		101236566	eukaryotic translation initiation factor 4 gamma 1-like			GO:0005488	binding
6087_0:00307f	LOC100201462	100201462	protein_coding	2.49608	547	2	3.57233	1.41984	THO complex subunit 4-like(LOC100201462)	hmg03013:RNA transport,hmg03015:mRNA surveillance pathway,hmg03040:Spliceosome,	IPR000504:RNA recognition motif domain,IPR012677:Nucleotide-binding, alpha-beta plait,IPR025715:Friend of PRMT1 duplication,	XP_002155396.1	THOC4	T2M9X5	100201462	THO complex subunit 4			GO:0003676	nucleic acid binding
6087_0:001e99	LOC100214556	100214556	protein_coding	2.49171	548	2	3.78377	1.19964	transformer-2 protein homolog alpha-like(LOC100214556)	hmg03040:Spliceosome,	IPR000504:RNA recognition motif domain,IPR012677:Nucleotide-binding, alpha-beta plait,	XP_002158647.2	TRA2A	T2ME28	100214556	Transformer-2 protein homolog alpha			GO:0003676	nucleic acid binding
6087_0:001a16	LOC100199407	100199407	protein_coding	2.48778	549	2	3.93304	1.04251	eukaryotic translation initiation factor 2 subunit 1-like(LOC100199407)	hmg03013:RNA transport,hmg04141:Protein processing in endoplasmic reticulum,		XP_002156465.2	LOC100199407		100199407	eukaryotic translation initiation factor 2 subunit 1-like	GO:0031571|GO:0001731	mitotic G1 DNA damage checkpoint|formation of translation preinitiation complex	GO:0003676	nucleic acid binding	GO:0043614|GO:0005850|GO:0010494|GO:0005737|GO:0005851	multi-eIF complex|eukaryotic translation initiation factor 2 complex|cytoplasmic stress granule|cytoplasm|eukaryotic translation initiation factor 2B complex
6087_0:00098f	LOC100209434	100209434	protein_coding	2.48673	550	1	4.65209	0.321366				XP_012566973.1	LOC100209434		100209434	myosin light chain kinase, smooth muscle-like	GO:0006468	protein phosphorylation	GO:0005524	ATP binding
6087_0:0018ce	LOC100207954	100207954	protein_coding	2.48033	551	1	4.66386	0.296797				XP_002162750.2	LOC100207954		100207954	uncharacterized protein LOC100207954
6087_0:0011f6	LOC100209741	100209741	protein_coding	2.47657	552	2	3.86832	1.08482	S-adenosylmethionine decarboxylase proenzyme 2-like(LOC100209741)	hmg00270:Cysteine and methionine metabolism,hmg00330:Arginine and proline metabolism,hmg01100:Metabolic pathways,	IPR001985:S-adenosylmethionine decarboxylase,IPR016067:S-adenosylmethionine decarboxylase, core,IPR018166:S-adenosylmethionine decarboxylase, conserved site,IPR018167:S-adenosylmethionine decarboxylase subgroup,	XP_002164390.1	AMD1	T2MH94	100209741	S-adenosylmethionine decarboxylase proenzyme	GO:0006597|GO:0008295	spermine biosynthetic process|spermidine biosynthetic process	GO:0004014	adenosylmethionine decarboxylase activity	GO:0005829	cytosol
6087_0:000c93	LOC100213913	100213913	protein_coding	2.47522	553	1	4.61647	0.333963	probable caffeoyl-CoA O-methyltransferase 2(LOC100213913)		IPR002935:O-methyltransferase, family 3,	XP_012553839.1	COMTD1	T2MAW1	100213913	Catechol O-methyltransferase domain-containing protein 1	GO:0032259	methylation	GO:0016491|GO:0008171	oxidoreductase activity|O-methyltransferase activity	GO:0005739	mitochondrion
6087_0:004098	LOC105848613	105848613	protein_coding	2.47024	554	1	4.94049	0	myotrophin-like(LOC105848613)		IPR002110:Ankyrin repeat,IPR020683:Ankyrin repeat-containing domain,	XP_012564243.1	MTPN	T2MEX9	105848613	Myotrophin
6087_0:000ea8	LOC100213910	100213910	protein_coding	2.46863	555	2	4.25934	0.677914	ATP synthase F(0) complex subunit B1, mitochondrial-like(LOC100213910)	hmg00190:Oxidative phosphorylation,hmg01100:Metabolic pathways,	IPR008688:ATPase, F0 complex, B chain/subunit B/MI25,IPR013837:ATPase, F0 complex, B chain/subunit B,	XP_012554280.1	ATP5F1	T2MGI6	100213910	ATP synthase subunit b,mitochondrial	GO:0015986|GO:0099132	ATP synthesis coupled proton transport|NA	GO:0046961|GO:0046933|GO:0015078	proton-transporting ATPase activity, rotational mechanism|proton-transporting ATP synthase activity, rotational mechanism|proton transmembrane transporter activity	GO:0000276|GO:0000274	mitochondrial proton-transporting ATP synthase complex, coupling factor F(o)|mitochondrial proton-transporting ATP synthase, stator stalk
6087_0:003a01	LOC100205745	100205745	protein_coding	2.44653	556	2	4.39451	0.498551				XP_012563000.1	LOC100205745		100205745	uncharacterized protein LOC100205745			GO:0005509	calcium ion binding
6087_0:00382b	LOC105847552	105847552	protein_coding	2.44139	557	1	4.62034	0.262437				XP_012562643.1	LOC105847552		105847552	uncharacterized protein LOC105847552
6087_0:00221e	LOC100200433	100200433	protein_coding	2.43999	558	2	3.88076	0.999225				XP_012558235.1	LOC100200433		100200433	LIM domain-binding protein 3-like isoform X1			GO:0046872	metal ion binding
6087_0:002d67	LOC100207321	100207321	protein_coding	2.43502	559	1	4.67935	0.19069				XP_002158608.2	LOC100207321		100207321	cathepsin L1-like	GO:0006508	proteolysis
6087_0:002b9e	LOC101235129	101235129	protein_coding	2.43454	560	2	4.40147	0.467608	uncharacterized LOC101235129(LOC101235129)		IPR008160:Collagen triple helix repeat,	NP_001267846.1	LOC101235129	G7H7W7	101235129	Minicollagen 14
6087_0:0030b5	LOC100202243	100202243	protein_coding	2.43429	561	2	4.29732	0.571254				XP_002162929.3	LOC100202243		100202243	protein lifeguard 4-like					GO:0016021|GO:0016020	integral component of membrane|membrane
6087_0:001842	LOC100215533	100215533	protein_coding	2.42299	562	2	4.25342	0.592563	coatomer subunit delta-like(LOC100215533)		IPR011012:Longin-like domain,IPR022775:AP complex, mu/sigma subunit,IPR027059:Coatomer delta subunit,	XP_002163602.2	ARCN1	T2MG56	100215533	Coatomer subunit delta					GO:0005737|GO:0005794|GO:0000139|GO:0016020|GO:0030663	cytoplasm|Golgi apparatus|Golgi membrane|membrane|COPI-coated vesicle membrane
6087_0:004e35	ND4L		protein_coding	2.42224	563	1	4.84448	0				YP_002221534.1	ND4L	B4F7N0	6904239	NADH dehydrogenase subunit 4L
6087_0:003841	LOC100201149	100201149	protein_coding	2.42124	564	2	3.65925	1.18323				XP_012562660.1	LOC100201149		100201149	golgin subfamily B member 1-like
6087_0:000a07	LOC100212827	100212827	protein_coding	2.41713	565	1	4.83426	0				XP_002166229.3	LOC100212827		100212827	astacin-like metalloprotease toxin 5	GO:0006508|GO:0018996	proteolysis|molting cycle, collagen and cuticulin-based cuticle	GO:0008237|GO:0008270|GO:0004222	metallopeptidase activity|zinc ion binding|metalloendopeptidase activity
6087_0:003301	LOC100202622	100202622	protein_coding	2.41196	566	1	4.82392	0				XP_002154154.3	LOC100202622		100202622	latent-transforming growth factor beta-binding protein 4-like			GO:0005201|GO:0005509	extracellular matrix structural constituent|calcium ion binding	GO:0005578	NA
6087_0:004024	LOC100203063	100203063	protein_coding	2.41002	567	1	4.82004	0				XP_002154935.1	LOC100203063		100203063	glutaredoxin-2, mitochondrial-like	GO:0022900|GO:0055114	electron transport chain|NA			GO:0005623	NA
6087_0:003e7f	LOC100201246	100201246	protein_coding	2.39784	568	2	3.35129	1.44438				XP_002169520.1	LOC100201246		100201246	cathepsin L1-like	GO:0006508	proteolysis
6087_0:000b14	LOC100212510	100212510	protein_coding	2.38538	569	2	3.37855	1.39221	succinyl-CoA ligase subunit alpha, mitochondrial-like(LOC100212510)	hmg00020:Citrate cycle (TCA cycle),hmg00640:Propanoate metabolism,hmg01100:Metabolic pathways,hmg01130:Biosynthesis of antibiotics,hmg01200:Carbon metabolism,	IPR003781:CoA-binding,IPR005810:Succinyl-CoA ligase, alpha subunit,IPR005811:ATP-citrate lyase/succinyl-CoA ligase,IPR016040:NAD(P)-binding domain,IPR016102:Succinyl-CoA synthetase-like,IPR017440:ATP-citrate lyase/succinyl-CoA ligase, active site,	XP_012553524.1	SUCLG1	T2MF60	100212510	Succinate--CoA ligase	GO:0006099	tricarboxylic acid cycle	GO:0016874|GO:0004775|GO:0003824|GO:0000166|GO:0048037|GO:0004776	ligase activity|succinate-CoA ligase (ADP-forming) activity|catalytic activity|nucleotide binding|NA|succinate-CoA ligase (GDP-forming) activity	GO:0005739	mitochondrion
6087_0:000a8c	LOC100214668	100214668	protein_coding	2.38231	570	2	4.32822	0.436406				XP_002161913.1	LOC100214668		100214668	tubulin beta chain-like	GO:0007017|GO:0007010	microtubule-based process|cytoskeleton organization	GO:0003924|GO:0005200|GO:0005525|GO:0000166	GTPase activity|structural constituent of cytoskeleton|GTP binding|nucleotide binding	GO:0005874|GO:0005737|GO:0005856	microtubule|cytoplasm|cytoskeleton
6087_0:002fc5	LOC100209441	100209441	protein_coding	2.38224	571	2	3.11218	1.6523	cytochrome c-like(LOC100209441)		IPR002327:Cytochrome c, class IA/ IB,IPR009056:Cytochrome c domain,	XP_004209990.1	CYCS	T2MEP5	100209441	Cytochrome c	GO:0022900|GO:0055114|GO:0006123|GO:0043280|GO:0006122	electron transport chain|NA|mitochondrial electron transport, cytochrome c to oxygen|positive regulation of cysteine-type endopeptidase activity involved in apoptotic process|mitochondrial electron transport, ubiquinol to cytochrome c	GO:0046872|GO:0020037	metal ion binding|heme binding	GO:0005739|GO:0070469	mitochondrion|respirasome
6087_0:0029c8	LOC101239605	101239605	protein_coding	2.38178	572	1	4.76356	0				XP_012559788.1	LOC101239605		101239605	neurogenic locus protein delta-like
6087_0:00404c	LOC100212246	100212246	protein_coding	2.37669	573	2	2.10238	2.65101				XP_002163554.2	LOC100212246		100212246	RNA-binding protein 26-like	GO:0006397	mRNA processing	GO:0046872|GO:0003676	metal ion binding|nucleic acid binding
6087_0:000731	LOC100192302	100192302	protein_coding	2.37591	574	2	3.83626	0.915565				XP_002154751.2	LOC100192302		100192302	ras-like protein RAS2			GO:0003924|GO:0000166|GO:0005525	GTPase activity|nucleotide binding|GTP binding	GO:0016020	membrane
6087_0:001eb1	LOC100204915	100204915	protein_coding	2.37548	575	2	3.56879	1.18217				XP_002163153.1	LOC100204915		100204915	uncharacterized protein LOC100204915
6087_0:00255f	LOC100204890	100204890	protein_coding	2.37062	576	2	4.25663	0.484602	actin-related protein 2/3 complex subunit 5-like(LOC100204890)	hmg04144:Endocytosis,		XP_002162059.2	LOC100204890		100204890	actin-related protein 2/3 complex subunit 5-like	GO:0030833|GO:0034314|GO:0016477	regulation of actin filament polymerization|Arp2/3 complex-mediated actin nucleation|cell migration	GO:0051015	actin filament binding	GO:0015629|GO:0005885|GO:0005856|GO:0005737	actin cytoskeleton|Arp2/3 protein complex|cytoskeleton|cytoplasm
6087_0:0016a2	LOC100202073	100202073	protein_coding	2.36805	577	2	4.03672	0.699376				XP_002159690.1	LOC100202073		100202073	uncharacterized protein LOC100202073	GO:0031221|GO:0046373	arabinan metabolic process|L-arabinose metabolic process	GO:0046556	alpha-L-arabinofuranosidase activity
6087_0:000fa9	LOC100197032	100197032	protein_coding	2.36752	578	2	3.72136	1.01368				XP_002167286.1	LOC100197032		100197032	serine/arginine-rich splicing factor 5-like			GO:0003676	nucleic acid binding
	LOC101238955	101238955	lncRNA	2.3639	579	2	3.72921	0.998585
6087_0:0014fe	LOC101239379	101239379	protein_coding	2.36171	580	2	3.79511	0.928308	peroxisome assembly protein 12-like(LOC101239379)		IPR006845:Pex, N-terminal,IPR013083:Zinc finger, RING/FYVE/PHD-type,IPR017375:Peroxisome assembly protein 12,	XP_004207348.2	PEX12	T2MJR5	101239379	Peroxisome assembly protein 12	GO:0006625|GO:0006513|GO:0016558|GO:0007031	protein targeting to peroxisome|protein monoubiquitination|protein import into peroxisome matrix|peroxisome organization	GO:0008022|GO:0008270	protein C-terminus binding|zinc ion binding	GO:0005779|GO:1990429|GO:0016020|GO:0005778	integral component of peroxisomal membrane|peroxisomal importomer complex|membrane|peroxisomal membrane
6087_0:004563	LOC100209643	100209643	protein_coding	2.3536	581	2	3.65135	1.05586				XP_002166617.1	LOC100209643		100209643	multiple epidermal growth factor-like domains protein 11					GO:0016021	integral component of membrane
6087_0:00417e	LOC100214359	100214359	protein_coding	2.35122	582	2	3.92181	0.780631	acyl carrier protein 2, mitochondrial-like(LOC100214359)	hmg00190:Oxidative phosphorylation,hmg01100:Metabolic pathways,		XP_002170625.2	LOC100214359		100214359	acyl carrier protein 2, mitochondrial-like	GO:0009245	lipid A biosynthetic process	GO:0000036|GO:0031177|GO:0000035	acyl carrier activity|phosphopantetheine binding|acyl binding	GO:0005829	cytosol
6087_0:000172	LOC100208312	100208312	protein_coding	2.34546	583	2	4.06944	0.62148	T-complex protein 1 subunit gamma-like(LOC100208312)		IPR002194:Chaperonin TCP-1, conserved site,IPR002423:Chaperonin Cpn60/TCP-1,IPR012719:T-complex protein 1, gamma subunit,IPR017998:Chaperone tailless complex polypeptide 1 (TCP-1),IPR027409:GroEL-like apical domain,IPR027410:TCP-1-like chaperonin intermediate domain,IPR027413:GroEL-like equatorial domain,	XP_002163432.1	CCT3	T2MFI1	100208312	T-complex protein 1 subunit gamma	GO:0061077|GO:0006458	chaperone-mediated protein folding|'de novo' protein folding	GO:0005524|GO:0051082|GO:0044183|GO:0000166	ATP binding|unfolded protein binding|protein folding chaperone|nucleotide binding	GO:0005832|GO:0005737	chaperonin-containing T-complex|cytoplasm
6087_0:001c91	LOC100206076	100206076	protein_coding	2.33822	584	2	4.05298	0.623466	fructose-bisphosphate aldolase A-like(LOC100206076)	hmg00010:Glycolysis / Gluconeogenesis,hmg00030:Pentose phosphate pathway,hmg00051:Fructose and mannose metabolism,hmg01100:Metabolic pathways,hmg01130:Biosynthesis of antibiotics,hmg01200:Carbon metabolism,hmg01230:Biosynthesis of amino acids,	IPR000741:Fructose-bisphosphate aldolase, class-I,IPR013785:Aldolase-type TIM barrel,	XP_002161209.1	ALDOA	T2MHF6	100206076	Fructose-bisphosphate aldolase A			GO:0016829|GO:0004332|GO:0003824	lyase activity|fructose-bisphosphate aldolase activity|catalytic activity
6087_0:002c04	LOC101238056	101238056	protein_coding	2.33636	585	1	4.67271	0				XP_012560220.1	LOC101238056		101238056	DNA-directed RNA polymerase II subunit RPB1
	LOC105846569	105846569	lncRNA	2.33162	586	1	4.66323	0
6087_0:00489d	LOC101238650	101238650	protein_coding	2.32895	587	1	4.65789	0				XP_004212636.1	LOC101238650		101238650	uncharacterized protein LOC101238650	GO:0015074	DNA integration	GO:0003676	nucleic acid binding
6087_0:002a35	LOC100215480	100215480	protein_coding	2.32768	588	2	3.92244	0.732917				XP_002157213.2	LOC100215480		100215480	failed axon connections homolog					GO:0016021	integral component of membrane
6087_0:000c0a	LOC100203513	100203513	protein_coding	2.32089	589	1	4.64177	0				XP_002163945.2	LOC100203513		100203513	acidic mammalian chitinase-like			GO:0016798|GO:0016787|GO:0008061	hydrolase activity, acting on glycosyl bonds|hydrolase activity|chitin binding	GO:0005576	extracellular region
6087_0:002302	LOC100197176	100197176	protein_coding	2.31832	590	1	4.32435	0.31229	eukaryotic initiation factor 4A-III(LOC100197176)	hmg03013:RNA transport,hmg03015:mRNA surveillance pathway,hmg03040:Spliceosome,		XP_002166522.2	LOC100197176		100197176	eukaryotic initiation factor 4A-III	GO:0010468|GO:0010501	regulation of gene expression|RNA secondary structure unwinding	GO:0003676|GO:0004004|GO:0005524|GO:0004386|GO:0016787|GO:0000166	nucleic acid binding|NA|ATP binding|helicase activity|hydrolase activity|nucleotide binding	GO:0071013|GO:0005737|GO:0005730	catalytic step 2 spliceosome|cytoplasm|nucleolus
6087_0:0015ce	LOC100213044	100213044	protein_coding	2.31423	591	2	4.22176	0.406696	cathepsin Z-like(LOC100213044)	hmg04142:Lysosome,		XP_002154692.2	LOC100213044		100213044	cathepsin Z-like	GO:0006508|GO:0010757|GO:0060441|GO:1901214|GO:0032091|GO:0051603	proteolysis|negative regulation of plasminogen activation|epithelial tube branching involved in lung morphogenesis|regulation of neuron death|negative regulation of protein binding|proteolysis involved in cellular protein catabolic process	GO:0004180|GO:0004197	carboxypeptidase activity|cysteine-type endopeptidase activity	GO:0043231|GO:0005615|GO:0099738|GO:0005764|GO:0005783	intracellular membrane-bounded organelle|extracellular space|cell cortex region|lysosome|endoplasmic reticulum
6087_0:002e9a	LOC100206852	100206852	protein_coding	2.31016	592	2	3.22656	1.39377	glutamine synthetase-like(LOC100206852)	hmg00220:Arginine biosynthesis,hmg00250:Alanine, aspartate and glutamate metabolism,hmg00630:Glyoxylate and dicarboxylate metabolism,hmg00910:Nitrogen metabolism,hmg01100:Metabolic pathways,hmg01230:Biosynthesis of amino acids,		XP_012560752.1	LOC100206852		100206852	glutamine synthetase-like isoform X1	GO:0006807|GO:0006542	nitrogen compound metabolic process|glutamine biosynthetic process	GO:0004356|GO:0003824|GO:0005524|GO:0016874|GO:0000166	glutamate-ammonia ligase activity|catalytic activity|ATP binding|ligase activity|nucleotide binding
6087_0:003924	LOC100212702	100212702	protein_coding	2.30995	593	1	4.6199	0				XP_002168171.1	LOC100212702		100212702	synaptotagmin-like protein 3
6087_0:001ebc	LOC100207837	100207837	protein_coding	2.30975	594	1	4.4072	0.212299	glutamate--cysteine ligase regulatory subunit-like(LOC100207837)	hmg00480:Glutathione metabolism,hmg01100:Metabolic pathways,		XP_012557554.1	LOC100207837		100207837	glutamate--cysteine ligase regulatory subunit-like	GO:0006750|GO:0035229	glutathione biosynthetic process|positive regulation of glutamate-cysteine ligase activity	GO:0035226	glutamate-cysteine ligase catalytic subunit binding	GO:0017109	glutamate-cysteine ligase complex
	LOC105844660	105844660	lncRNA	2.30565	595	1	4.61131	0
6087_0:003fd4	LOC101239980	101239980	protein_coding	2.30512	596	1	4.39095	0.219281				XP_012564104.1	LOC101239980		101239980	titin-like
	LOC100197862	100197862	lncRNA	2.30264	597	1	4.60528	0
6087_0:00085a	LOC100213011	100213011	protein_coding	2.30006	598	1	4.21712	0.382991	cellular nucleic acid-binding protein-like(LOC100213011)		IPR001878:Zinc finger, CCHC-type,	XP_002154581.1	CNBP	T2MEN6	100213011	Cellular nucleic acid-binding protein			GO:0008270|GO:0003676	zinc ion binding|nucleic acid binding
6087_0:000c42	LOC100212604	100212604	protein_coding	2.29702	599	2	4.03232	0.561728				XP_002169633.2	LOC100212604		100212604	lysosome-associated membrane glycoprotein 1-like
6087_0:000ec0	LOC100207367	100207367	protein_coding	2.28152	600	2	3.71859	0.844449	nucleobindin-2-like(LOC100207367)		IPR002048:EF-hand domain,IPR011992:EF-hand-like domain,IPR018247:EF-Hand 1, calcium-binding site,	XP_002158884.2	NUCB2	T2MED7	100207367	Nucleobindin-2			GO:0005509	calcium ion binding
6087_0:0013cb	LOC100200475	100200475	protein_coding	2.2796	601	1	4.43346	0.125744	protein transport protein Sec61 subunit alpha isoform 2(LOC100200475)	hmg03060:Protein export,hmg04141:Protein processing in endoplasmic reticulum,hmg04145:Phagosome,	IPR002208:SecY/SEC61-alpha family,IPR019561:Translocon Sec61/SecY, plug domain,IPR023201:SecY subunit domain,	XP_002160468.1	SEC61A2	T2M5D3	100200475	Protein transport protein Sec61 subunit alpha isoform 2					GO:0016021|GO:0016020	integral component of membrane|membrane
6087_0:0047e4	LOC100205838	100205838	protein_coding	2.26992	602	2	4.09616	0.443681				XP_002163107.3	LOC100205838		100205838	T-complex protein 1 subunit beta	GO:0061077|GO:0006458	chaperone-mediated protein folding|'de novo' protein folding	GO:0051082|GO:0044183|GO:0005524|GO:0000166	unfolded protein binding|protein folding chaperone|ATP binding|nucleotide binding	GO:0005832|GO:0005737	chaperonin-containing T-complex|cytoplasm
6087_0:00052f	LOC100201038	100201038	protein_coding	2.26623	603	1	4.21845	0.314005				XP_002165742.2	LOC100201038		100201038	uncharacterized protein LOC100201038
	LOC101238617	101238617	lncRNA	2.26053	604	1	4.52107	0
6087_0:001f40	LOC100199030	100199030	protein_coding	2.25798	605	2	4.04011	0.475846	eukaryotic translation initiation factor 2 subunit 2-like(LOC100199030)	hmg03013:RNA transport,	IPR002735:Translation initiation factor IF2/IF5,IPR016189:Translation initiation factor IF2/IF5, N-terminal,IPR016190:Translation initiation factor IF2/IF5, zinc-binding,	XP_002156112.2	EIF2S2	T2MH60	100199030	Eukaryotic translation initiation factor 2 subunit 2
6087_0:002c65	LOC100206138	100206138	protein_coding	2.25766	606	1	4.22941	0.285902				XP_004209643.2	LOC100206138		100206138	guanine nucleotide-binding protein G(I)/G(S)/G(T) subunit beta-1
6087_0:003192	LOC100198110	100198110	protein_coding	2.2552	607	1	4.34598	0.164412				XP_002163322.2	LOC100198110		100198110	chitinase-3-like protein 1	GO:0006032	chitin catabolic process	GO:0016798|GO:0016787|GO:0008061|GO:0004568	hydrolase activity, acting on glycosyl bonds|hydrolase activity|chitin binding|chitinase activity	GO:0005576	extracellular region
6087_0:0021ef	LOC100215968	100215968	protein_coding	2.25502	608	2	2.94104	1.569	glutathione S-transferase Mu 1-like(LOC100215968)	hmg00480:Glutathione metabolism,hmg00980:Metabolism of xenobiotics by cytochrome P450,hmg00982:Drug metabolism - cytochrome P450,		XP_012558199.1	LOC100215968		100215968	glutathione S-transferase Mu 1-like			GO:0004364	glutathione transferase activity
6087_0:002aa3	LOC100215460	100215460	protein_coding	2.25131	609	2	2.94136	1.56126	gamma-aminobutyric acid receptor-associated protein-like 2(LOC100215460)	hmg04068:FoxO signaling pathway,hmg04140:Regulation of autophagy,	IPR004241:Autophagy protein Atg8 ubiquitin-like,	XP_002163079.2	GABARAPL2	T2MFA6	100215460	Gamma-aminobutyric acid receptor-associated protein-like 2	GO:0000045|GO:0000422|GO:0006995	autophagosome assembly|autophagy of mitochondrion|cellular response to nitrogen starvation	GO:0031625	ubiquitin protein ligase binding	GO:0000421|GO:0005776|GO:0005829	autophagosome membrane|autophagosome|cytosol
6087_0:00236e	LOC100200266	100200266	protein_coding	2.25047	610	2	3.32292	1.17802	pyruvate dehydrogenase E1 component subunit alpha type II, mitochondrial-like(LOC100200266)	hmg00010:Glycolysis / Gluconeogenesis,hmg00020:Citrate cycle (TCA cycle),hmg00620:Pyruvate metabolism,hmg01100:Metabolic pathways,hmg01130:Biosynthesis of antibiotics,hmg01200:Carbon metabolism,		XP_002162893.2	LOC100200266		100200266	pyruvate dehydrogenase E1 component subunit alpha type II, mitochondrial-like	GO:0006086|GO:0055114	acetyl-CoA biosynthetic process from pyruvate|NA	GO:0004739|GO:0016624|GO:0016491	pyruvate dehydrogenase (acetyl-transferring) activity|oxidoreductase activity, acting on the aldehyde or oxo group of donors, disulfide as acceptor|oxidoreductase activity	GO:0043231|GO:0005739	intracellular membrane-bounded organelle|mitochondrion
6087_0:000a55	LOC100209198	100209198	protein_coding	2.24946	611	1	4.38476	0.114156				XP_012567151.1	LOC100209198		100209198	uncharacterized protein LOC100209198 isoform X1			GO:0005509	calcium ion binding
6087_0:0001ca	LOC100206995	100206995	protein_coding	2.24601	612	1	4.27307	0.21895				XP_012554858.1	LOC100206995		100206995	acidic proline-rich protein PRP25-like isoform X2
6087_0:002c4d	LOC100201265	100201265	protein_coding	2.2439	613	1	4.4878	0				XP_002155670.1	LOC100201265		100201265	nucleolar protein 16-like	GO:0042273	ribosomal large subunit biogenesis			GO:0005730|GO:0005634|GO:0030687|GO:0043231	nucleolus|nucleus|preribosome, large subunit precursor|intracellular membrane-bounded organelle
6087_0:0012d6	LOC100197338	100197338	protein_coding	2.24293	614	2	3.87051	0.615347	probable 28S ribosomal protein S10, mitochondrial(LOC100197338)	hmg03010:Ribosome,	IPR001848:Ribosomal protein S10,IPR027486:Ribosomal protein S10 domain,	XP_002161169.1	MRPS10	T2MEE1	100197338	28S ribosomal protein S10,mitochondrial					GO:0005739|GO:0005763	mitochondrion|mitochondrial small ribosomal subunit
6087_0:0001ed	LOC105843796	105843796	protein_coding	2.24109	615	2	3.78737	0.694808	somatomedin-B and thrombospondin type-1 domain-containing protein-like(LOC105843796)		IPR000884:Thrombospondin, type 1 repeat,IPR001212:Somatomedin B domain,	XP_012555056.1	RPESP	T2MA82	105843796	RPE-spondin	GO:0006955	immune response	GO:0005044|GO:0030247	scavenger receptor activity|polysaccharide binding
6087_0:0017f7	LOC100200796	100200796	protein_coding	2.23373	616	2	1.89093	2.57654				XP_002166597.1	LOC100200796		100200796	uncharacterized protein LOC100200796
6087_0:00229a	LOC100202564	100202564	protein_coding	2.23308	617	2	3.72621	0.739951	eukaryotic translation initiation factor 3 subunit D-like(LOC100202564)	hmg03013:RNA transport,		XP_012558333.1	LOC100202564		100202564	eukaryotic translation initiation factor 3 subunit D-like	GO:0002191|GO:0001731|GO:0002183|GO:0006446|GO:0001732	cap-dependent translational initiation|formation of translation preinitiation complex|cytoplasmic translational initiation|regulation of translational initiation|formation of cytoplasmic translation initiation complex	GO:0098808	mRNA cap binding	GO:0005852|GO:0071540|GO:0005737|GO:0071541|GO:0005829|GO:0016282	eukaryotic translation initiation factor 3 complex|eukaryotic translation initiation factor 3 complex, eIF3e|cytoplasm|eukaryotic translation initiation factor 3 complex, eIF3m|cytosol|eukaryotic 43S preinitiation complex
6087_0:004223	LOC105848841	105848841	protein_coding	2.2268	618	1	4.45359	0				XP_012564520.1	LOC105848841		105848841	histidine ammonia-lyase-like	GO:0006548|GO:0019557|GO:0019556|GO:0009698|GO:0009800|GO:0006559	histidine catabolic process|histidine catabolic process to glutamate and formate|histidine catabolic process to glutamate and formamide|phenylpropanoid metabolic process|cinnamic acid biosynthetic process|L-phenylalanine catabolic process	GO:0003824|GO:0004397|GO:0016841|GO:0045548|GO:0016829	catalytic activity|histidine ammonia-lyase activity|ammonia-lyase activity|phenylalanine ammonia-lyase activity|lyase activity	GO:0005737	cytoplasm
	LOC101237843	101237843	lncRNA	2.22579	619	2	3.78267	0.668912
6087_0:000962	LOC100209764	100209764	protein_coding	2.22321	620	2	3.28507	1.16134	superoxide dismutase [Mn], mitochondrial-like(LOC100209764)	hmg04068:FoxO signaling pathway,hmg04146:Peroxisome,	IPR001189:Manganese/iron superoxide dismutase,IPR019831:Manganese/iron superoxide dismutase, N-terminal,IPR019832:Manganese/iron superoxide dismutase, C-terminal,IPR019833:Manganese/iron superoxide dismutase, binding site,	XP_002160626.1	LOC100209764;SOD2	D9I7Q2	100209764	Superoxide dismutase	GO:0006801|GO:0055114|GO:0019430	superoxide metabolic process|NA|removal of superoxide radicals	GO:0016491|GO:0046872	oxidoreductase activity|metal ion binding
6087_0:000907	LOC100211146	100211146	protein_coding	2.22078	621	2	3.83031	0.611242	cytochrome c oxidase subunit 5B, mitochondrial-like(LOC100211146)	hmg00190:Oxidative phosphorylation,hmg01100:Metabolic pathways,		XP_012566872.1	LOC100211146		100211146	cytochrome c oxidase subunit 5B, mitochondrial-like	GO:0006123|GO:0042776|GO:0009060|GO:0033617|GO:0022900	mitochondrial electron transport, cytochrome c to oxygen|mitochondrial ATP synthesis coupled proton transport|aerobic respiration|mitochondrial cytochrome c oxidase assembly|electron transport chain	GO:0004129|GO:0008270	cytochrome-c oxidase activity|zinc ion binding	GO:0005740|GO:0005739	mitochondrial envelope|mitochondrion
	LOC105845353	105845353	lncRNA	2.21839	622	1	4.43678	0
6087_0:001c18	LOC105844667	105844667	protein_coding	2.21271	623	2	3.75849	0.666928				XP_012557012.1	LOC105844667		105844667	pre-rRNA-processing protein TSR1 homolog
6087_0:0014f6	LOC100208948	100208948	protein_coding	2.21204	624	1	4.13041	0.293666	ATP-binding cassette sub-family F member 2-like(LOC100208948)		IPR003439:ABC transporter-like,IPR003593:AAA+ ATPase domain,IPR017871:ABC transporter, conserved site,IPR027417:P-loop containing nucleoside triphosphate hydrolase,	XP_012555586.1	ABCF2	T2M3R0	100208948	ATP-binding cassette sub-family F member 2			GO:0005524|GO:0000166	ATP binding|nucleotide binding
	LOC105846636	105846636	lncRNA	2.2091	625	1	4.4182	0
	LOC100206069	100206069	lncRNA	2.20494	626	2	2.85274	1.55714
6087_0:000023	LOC100211216	100211216	protein_coding	2.1953	627	2	3.71583	0.674778				XP_002157325.1	LOC100211216		100211216	inositol phosphorylceramide synthase catalytic subunit aur1-like	GO:0030148	sphingolipid biosynthetic process	GO:0045140	inositol phosphoceramide synthase activity	GO:0016020|GO:0016021|GO:0070916	membrane|integral component of membrane|inositol phosphoceramide synthase complex
6087_0:001569	LOC100200732	100200732	protein_coding	2.19474	628	2	3.57677	0.812715				XP_012555672.1	LOC100200732		100200732	ras-like GTP-binding protein Rho1	GO:0007264	small GTPase mediated signal transduction	GO:0003924|GO:0005525|GO:0000166	GTPase activity|GTP binding|nucleotide binding	GO:0005622|GO:0016020|GO:0032154	intracellular anatomical structure|membrane|cleavage furrow
6087_0:00199c	LOC101238686	101238686	protein_coding	2.1944	629	2	2.33927	2.04952				XP_012556515.1	LOC101238686		101238686	uncharacterized protein LOC101238686
	LOC105845314	105845314	lncRNA	2.18908	630	1	4.37817	0
6087_0:00261e	LOC100215560	100215560	protein_coding	2.18502	631	1	4.37005	0				XP_012559066.1	LOC100215560		100215560	mannose-specific lectin-like					GO:0016021	integral component of membrane
6087_0:000676	LOC101236568	101236568	protein_coding	2.17859	632	2	2.84538	1.5118				XP_004205978.1	LOC101236568		101236568	protein dpy-30 homolog isoform X1	GO:0051568|GO:0006348	histone H3-K4 methylation|chromatin silencing at telomere			GO:0044666|GO:0048188|GO:0000781	MLL3/4 complex|Set1C/COMPASS complex|chromosome, telomeric region
6087_0:003842	LOC100199145	100199145	protein_coding	2.1783	633	2	2.64159	1.71501				XP_004210895.1	LOC100199145		100199145	myosin heavy chain, striated muscle-like
6087_0:0046ae	LOC105849529	105849529	protein_coding	2.17686	634	2	3.89183	0.461892				XP_012565375.1	LOC105849529		105849529	uncharacterized protein LOC105849529	GO:0015074	DNA integration	GO:0003676	nucleic acid binding
6087_0:00062a	LOC100192275	100192275	protein_coding	2.1757	635	2	1.67708	2.67431				NP_001267765.1	LOC100192275	Q3I3L7	100192275	Dickkopf-like protein Dlp-1	GO:0007275	multicellular organism development			GO:0005615|GO:0005576	extracellular space|extracellular region
6087_0:000c72	LOC100192253	100192253	protein_coding	2.17324	636	1	4.34648	0				XP_012553808.1	LOC100192253		100192253	midasin
6087_0:004e10	LOC101239988	101239988	protein_coding	2.16905	637	1	4.3381	0				XP_004213374.1	LOC101239988		101239988	phospholipid-transporting ATPase IB-like	GO:0015914|GO:0045332	phospholipid transport|phospholipid translocation	GO:0000166|GO:0005524|GO:0016787|GO:0000287	nucleotide binding|ATP binding|hydrolase activity|magnesium ion binding	GO:0016020|GO:0016021	membrane|integral component of membrane
6087_0:0030b6	LOC100210186	100210186	protein_coding	2.1675	638	2	3.01286	1.32213				XP_004210083.1	LOC100210186		100210186	coiled-coil domain-containing protein CG32809-like isoform X1
6087_0:00196b	LOC100199754	100199754	protein_coding	2.16664	639	2	3.86937	0.463916	collagen alpha-1(I) chain-like(LOC100199754)		IPR000885:Fibrillar collagen, C-terminal,IPR008160:Collagen triple helix repeat,	XP_002158319.2	LOC100199754	Q8MUF5	100199754	Fibrillar collagen	GO:0071230|GO:0030199	cellular response to amino acid stimulus|collagen fibril organization	GO:0005201|GO:0046332	extracellular matrix structural constituent|SMAD binding	GO:0005581|GO:0005615	collagen trimer|extracellular space
	LOC105850853	105850853	lncRNA	2.16595	640	1	4.3319	0
6087_0:003168	LOC101237274	101237274	protein_coding	2.16494	641	1	4.32988	0				XP_012561302.1	LOC101237274		101237274	uncharacterized protein LOC101237274
6087_0:001e32	LOC105844876	105844876	protein_coding	2.15851	642	1	4.0878	0.229211				XP_012557420.1	LOC105844876		105844876	uncharacterized protein LOC105844876	GO:0006281|GO:0000723|GO:0032508|GO:0006310	DNA repair|telomere maintenance|DNA duplex unwinding|DNA recombination	GO:0005524|GO:0016787|GO:0004386|GO:0000166	ATP binding|hydrolase activity|helicase activity|nucleotide binding
6087_0:002df7	LOC105846428	105846428	protein_coding	2.15801	643	2	3.41142	0.904604				XP_012560627.1	LOC105846428		105846428	lens fiber membrane intrinsic protein-like					GO:0016021	integral component of membrane
6087_0:00423a	LOC100214064	100214064	protein_coding	2.15408	644	2	2.69598	1.61219	ras-related protein Rab-10-like(LOC100214064)		IPR001806:Small GTPase superfamily,IPR005225:Small GTP-binding protein domain,IPR027417:P-loop containing nucleoside triphosphate hydrolase,	XP_002157570.3	LOC100214064;RAB10	A0S5V6	100214064	RAS related GTP-binding protein RAB10	GO:0006904|GO:0017157	vesicle docking involved in exocytosis|regulation of exocytosis	GO:0003924|GO:0005525	GTPase activity|GTP binding
6087_0:004e3a	ND4		protein_coding	2.15401	645	1	4.30802	0				YP_002221536.1	ND4	B4F7N2	6904238	NADH-ubiquinone oxidoreductase chain 4	GO:0055114|GO:0042773|GO:0006120	NA|ATP synthesis coupled electron transport|mitochondrial electron transport, NADH to ubiquinone	GO:0008137|GO:0016491	NADH dehydrogenase (ubiquinone) activity|oxidoreductase activity	GO:0005739|GO:0016020|GO:0016021	mitochondrion|membrane|integral component of membrane
6087_0:001027	LOC100208799	100208799	protein_coding	2.1482	646	2	3.5239	0.772507				XP_002167799.2	LOC100208799		100208799	uncharacterized protein ZK643.6-like	GO:0007154	cell communication			GO:0016021	integral component of membrane
6087_0:001d8e	LOC101239382	101239382	protein_coding	2.14719	647	2	2.71957	1.57482				XP_004208196.1	LOC101239382		101239382	uncharacterized protein LOC101239382
6087_0:001373	LOC100197425	100197425	protein_coding	2.14682	648	2	3.64853	0.645117	EF-hand domain-containing protein D2 homolog(LOC100197425)		IPR002048:EF-hand domain,IPR011992:EF-hand-like domain,IPR018247:EF-Hand 1, calcium-binding site,	XP_002161055.1	EFHD2	T2M8D8	100197425	EF-hand domain-containing protein D2			GO:0005509	calcium ion binding
6087_0:0021e8	LOC100201209	100201209	protein_coding	2.14165	649	2	3.74262	0.540687	UV excision repair protein RAD23 homolog B-like(LOC100201209)	hmg03420:Nucleotide excision repair,hmg04141:Protein processing in endoplasmic reticulum,	IPR000626:Ubiquitin,IPR004806:UV excision repair protein Rad23,IPR006636:Heat shock chaperonin-binding,IPR009060:UBA-like,IPR015360:XPC-binding domain,IPR015940:Ubiquitin-associated/translation elongation factor EF1B, N-terminal, eukaryote,	XP_002169219.2	RAD23B	T2MFN5	100201209	UV excision repair protein RAD23 homolog B	GO:0043161|GO:0032434	proteasome-mediated ubiquitin-dependent protein catabolic process|regulation of proteasomal ubiquitin-dependent protein catabolic process	GO:0003684|GO:0031593	damaged DNA binding|polyubiquitin modification-dependent protein binding	GO:0005634|GO:0005654|GO:0005829	nucleus|nucleoplasm|cytosol
	LOC105846964	105846964	lncRNA	2.1411	650	2	3.37901	0.903189
6087_0:0031c8	LOC100203528	100203528	protein_coding	2.14066	651	2	3.18171	1.0996				XP_002167629.1	LOC100203528		100203528	transcriptional activator protein Pur-alpha-like			GO:0046332|GO:0008134|GO:0003690	SMAD binding|transcription factor binding|double-stranded DNA binding	GO:0005634|GO:0005662	nucleus|DNA replication factor A complex
6087_0:0001b7	LOC100210318	100210318	protein_coding	2.13881	652	2	3.58343	0.69418				XP_012554649.1	LOC100210318		100210318	T-complex protein 1 subunit alpha-like	GO:0006458|GO:0061077	'de novo' protein folding|chaperone-mediated protein folding	GO:0051082|GO:0044183|GO:0005524|GO:0000166	unfolded protein binding|protein folding chaperone|ATP binding|nucleotide binding	GO:0005832|GO:0005737	chaperonin-containing T-complex|cytoplasm
	LOC105846273	105846273	lncRNA	2.13803	653	1	4.27607	0
6087_0:0014d5	LOC100197265	100197265	protein_coding	2.13614	654	1	4.27228	0				XP_004207331.1	LOC100197265		100197265	ribosomal L1 domain-containing protein 1-like	GO:0032880|GO:0042981|GO:2000772|GO:0000470	regulation of protein localization|regulation of apoptotic process|regulation of cellular senescence|maturation of LSU-rRNA	GO:0003730|GO:0045296|GO:0048027	mRNA 3'-UTR binding|cadherin binding|mRNA 5'-UTR binding	GO:0005730|GO:0030686	nucleolus|90S preribosome
6087_0:004cc1	LOC105850539	105850539	protein_coding	2.13524	655	1	3.98059	0.289898				XP_012566459.1	LOC105850539		105850539	uncharacterized protein LOC105850539
6087_0:003d45	LOC101237517	101237517	protein_coding	2.13351	656	1	4.20723	0.0597871				XP_004211427.1	LOC101237517		101237517	malate dehydrogenase, mitochondrial-like	GO:0019752|GO:0006108|GO:0006099|GO:0055114	carboxylic acid metabolic process|malate metabolic process|tricarboxylic acid cycle|NA	GO:0016615|GO:0003824|GO:0016616|GO:0016491|GO:0030060	malate dehydrogenase activity|catalytic activity|oxidoreductase activity, acting on the CH-OH group of donors, NAD or NADP as acceptor|oxidoreductase activity|L-malate dehydrogenase activity
6087_0:000be1	LOC100213691	100213691	protein_coding	2.13169	657	1	4.01794	0.245439	beta-hexosaminidase subunit alpha-like(LOC100213691)	hmg00511:Other glycan degradation,hmg00520:Amino sugar and nucleotide sugar metabolism,hmg00531:Glycosaminoglycan degradation,hmg00603:Glycosphingolipid biosynthesis - globo series,hmg00604:Glycosphingolipid biosynthesis - ganglio series,hmg01100:Metabolic pathways,hmg04142:Lysosome,		XP_002162378.2	LOC100213691		100213691	beta-hexosaminidase subunit alpha-like isoform X1			GO:0004563|GO:0102148|GO:0016798|GO:0016787	beta-N-acetylhexosaminidase activity|N-acetyl-beta-D-galactosaminidase activity|hydrolase activity, acting on glycosyl bonds|hydrolase activity
6087_0:000f44	LOC100203841	100203841	protein_coding	2.12423	658	2	3.2733	0.975158	adenosylhomocysteinase-like(LOC100203841)	hmg00270:Cysteine and methionine metabolism,hmg01100:Metabolic pathways,	IPR000043:Adenosylhomocysteinase,IPR015878:S-adenosyl-L-homocysteine hydrolase, NAD binding domain,IPR016040:NAD(P)-binding domain,IPR020082:S-adenosyl-L-homocysteine hydrolase, conserved site,	XP_004206772.2	AHCY	T2MH18	100203841	Adenosylhomocysteinase	GO:0033353|GO:0019510	S-adenosylmethionine cycle|S-adenosylhomocysteine catabolic process	GO:0004013|GO:0016787	adenosylhomocysteinase activity|hydrolase activity	GO:0005829	cytosol
	LOC100206496	100206496	lncRNA	2.12158	659	1	4.24316	0
6087_0:003a34	LOC101237999	101237999	protein_coding	2.11813	660	2	2.9121	1.32415	uncharacterized LOC101237999(LOC101237999)		IPR002475:Bcl2-like,IPR026298:Blc2 family,	XP_004211092.1	LOC101237999	A7LM79	101237999	Bcl-2-like 5	GO:0097192|GO:0008630|GO:0042981	extrinsic apoptotic signaling pathway in absence of ligand|intrinsic apoptotic signaling pathway in response to DNA damage|regulation of apoptotic process	GO:0042802|GO:0046982	identical protein binding|protein heterodimerization activity	GO:0016020|GO:0005829|GO:0005739|GO:0005741	membrane|cytosol|mitochondrion|mitochondrial outer membrane
6087_0:001fa5	LOC105845012	105845012	protein_coding	2.11618	661	1	4.08805	0.144316				XP_012557737.1	LOC105845012		105845012	uncharacterized protein LOC105845012	GO:0015074	DNA integration	GO:0003676	nucleic acid binding
6087_0:00279c	LOC100204156	100204156	protein_coding	2.11608	662	2	3.718	0.51416	cell division control protein 42 homolog(LOC100204156)	hmg04144:Endocytosis,	IPR001806:Small GTPase superfamily,IPR005225:Small GTP-binding protein domain,IPR027417:P-loop containing nucleoside triphosphate hydrolase,	XP_004209147.2	CDC42	T2MEG1	100204156	Cell division control protein 42 homolog	GO:0007264	small GTPase mediated signal transduction	GO:0000166|GO:0005525|GO:0003924	nucleotide binding|GTP binding|GTPase activity	GO:0005622|GO:0016020	intracellular anatomical structure|membrane
6087_0:0009cb	LOC100200912	100200912	protein_coding	2.11465	663	2	3.81842	0.410875				XP_012567030.1	LOC100200912		100200912	LOW QUALITY PROTEIN: ras GTPase-activating-like protein IQGAP1			GO:0005516	calmodulin binding	GO:0005737	cytoplasm
6087_0:000ff8	LOC100210472	100210472	protein_coding	2.11424	664	2	3.02436	1.20412	ATP synthase subunit delta, mitochondrial-like(LOC100210472)	hmg00190:Oxidative phosphorylation,hmg01100:Metabolic pathways,		XP_002167886.1	LOC100210472		100210472	ATP synthase subunit delta, mitochondrial-like	GO:0099132|GO:0015986	NA|ATP synthesis coupled proton transport	GO:0046933	proton-transporting ATP synthase activity, rotational mechanism	GO:0045261|GO:0005739|GO:0000275	proton-transporting ATP synthase complex, catalytic core F(1)|mitochondrion|mitochondrial proton-transporting ATP synthase complex, catalytic sector F(1)
6087_0:003606	LOC100201097	100201097	protein_coding	2.11398	665	2	3.59096	0.637007				XP_002160521.1	LOC100201097		100201097	prefoldin subunit 6-like			GO:0051087|GO:0051082	chaperone binding|unfolded protein binding	GO:0016272|GO:0005737	prefoldin complex|cytoplasm
6087_0:0047c0	LOC100210881	100210881	protein_coding	2.10893	666	2	3.64192	0.575946				XP_002156057.1	LOC100210881		100210881	RNA-binding protein 4-like isoform X1			GO:0003676	nucleic acid binding
6087_0:00387e	LOC100206203	100206203	protein_coding	2.10801	667	1	4.21602	0	translocon-associated protein subunit delta-like(LOC100206203)	hmg04141:Protein processing in endoplasmic reticulum,	IPR008855:Translocon-associated,	XP_002157620.1	SSR4	T2MFQ9	100206203	Translocon-associated protein subunit delta					GO:0016021|GO:0005783	integral component of membrane|endoplasmic reticulum
6087_0:000040	LOC105844231	105844231	protein_coding	2.10697	668	2	3.18836	1.02559				XP_012556101.1	LOC105844231		105844231	RNMT-activating mini protein-like	GO:0032259	methylation			GO:0005845	mRNA cap binding complex
6087_0:002761	LOC100201118	100201118	protein_coding	2.10185	669	2	3.67268	0.531022				XP_012559306.1	LOC100201118		100201118	uncharacterized protein LOC100201118			GO:0005524	ATP binding
6087_0:00016c	LOC100211830	100211830	protein_coding	2.09683	670	2	3.31555	0.878106	ubiquilin-1-like(LOC100211830)	hmg04141:Protein processing in endoplasmic reticulum,		XP_012554047.1	LOC100211830		100211830	ubiquilin-1-like					GO:0005829|GO:0005737	cytosol|cytoplasm
6087_0:00404d	LOC100199702	100199702	protein_coding	2.08878	671	2	3.11182	1.06573				XP_002160573.1	LOC100199702		100199702	E3 ubiquitin-protein ligase MYLIP-like	GO:0016567	protein ubiquitination	GO:0008092	cytoskeletal protein binding	GO:0005737|GO:0005634|GO:0005856	cytoplasm|nucleus|cytoskeleton
6087_0:002b59	LOC100199630	100199630	protein_coding	2.08594	672	1	4.17187	0				XP_012560086.1	LOC100199630		100199630	zinc metalloproteinase nas-4-like	GO:0006508	proteolysis	GO:0008270|GO:0008237|GO:0004222	zinc ion binding|metallopeptidase activity|metalloendopeptidase activity
6087_0:0037a5	LOC101236173	101236173	protein_coding	2.08589	673	1	4.17179	0				XP_004210850.1	LOC101236173		101236173	TBC1 domain family member 23-like	GO:1990403|GO:0042147|GO:0031175|GO:0007420|GO:0032680|GO:0050727|GO:0032755	embryonic brain development|retrograde transport, endosome to Golgi|neuron projection development|brain development|regulation of tumor necrosis factor production|regulation of inflammatory response|positive regulation of interleukin-6 production			GO:0005802|GO:0005794|GO:0071203	trans-Golgi network|Golgi apparatus|WASH complex
6087_0:0010b6	LOC100202416	100202416	protein_coding	2.08459	674	2	3.3631	0.806083	propionyl-CoA carboxylase alpha chain, mitochondrial(LOC100202416)	hmg00280:Valine, leucine and isoleucine degradation,hmg00630:Glyoxylate and dicarboxylate metabolism,hmg00640:Propanoate metabolism,hmg01100:Metabolic pathways,hmg01130:Biosynthesis of antibiotics,hmg01200:Carbon metabolism,		XP_002162313.1	LOC100202416		100202416	propionyl-CoA carboxylase alpha chain, mitochondrial			GO:0005524|GO:0046872|GO:0004075|GO:0003824|GO:0000166|GO:0016874	ATP binding|metal ion binding|biotin carboxylase activity|catalytic activity|nucleotide binding|ligase activity	GO:0005739	mitochondrion
6087_0:00034a	LOC100203605	100203605	protein_coding	2.08099	675	1	3.84033	0.321643	ubiquitin-conjugating enzyme E2 variant 2-like(LOC100203605)		IPR000608:Ubiquitin-conjugating enzyme, E2,IPR016135:Ubiquitin-conjugating enzyme/RWD-like,	XP_002153796.2	UBE2V2	T2MCQ1	100203605	Ubiquitin-conjugating enzyme E2 variant 2	GO:0006301|GO:0070534	postreplication repair|protein K63-linked ubiquitination	GO:0031625	ubiquitin protein ligase binding	GO:0005737|GO:0005634|GO:0005654	cytoplasm|nucleus|nucleoplasm
6087_0:0024a6	LOC100192286	100192286	protein_coding	2.07704	676	1	3.77296	0.381125	pol-RFamide neuropeptides(LOC100192286)			XP_002167694.1	LOC100192286	O76948	100192286	Neuropeptide
6087_0:004e37	ND1		protein_coding	2.07565	677	1	4.1513	0				YP_002221535.1	ND1	B4F7N1	6904241	NADH-ubiquinone oxidoreductase chain 1	GO:0055114	NA	GO:0008137|GO:0016491	NADH dehydrogenase (ubiquinone) activity|oxidoreductase activity	GO:0016020|GO:0005739|GO:0016021|GO:0005743|GO:0031966	membrane|mitochondrion|integral component of membrane|mitochondrial inner membrane|mitochondrial membrane
6087_0:001522	LOC105844043	105844043	protein_coding	2.07193	678	2	3.29851	0.84536				XP_012555618.1	LOC105844043		105844043	syndecan-2-B-like
6087_0:00129a	LOC100207528	100207528	protein_coding	2.07041	679	2	2.29772	1.84309	NADH dehydrogenase [ubiquinone] 1 beta subcomplex subunit 7-like(LOC100207528)	hmg00190:Oxidative phosphorylation,hmg01100:Metabolic pathways,		XP_012555108.1	LOC100207528		100207528	NADH dehydrogenase	GO:0055114	NA	GO:0008137|GO:0003954	NADH dehydrogenase (ubiquinone) activity|NADH dehydrogenase activity	GO:0005739	mitochondrion
6087_0:00200b	LOC101236347	101236347	protein_coding	2.06364	680	1	3.94369	0.183586	uncharacterized LOC101236347(LOC101236347)		IPR008160:Collagen triple helix repeat,	NP_001267824.1	LOC101236347	G7H7W3	101236347	Minicollagen 10
6087_0:0025be	crim2		protein_coding	2.06245	681	1	3.93376	0.191149				NP_001267819.1	crim2	Q2VYC5	100189550	Chordin-like protein
6087_0:00115f	LOC100214470	100214470	protein_coding	2.06204	682	1	3.92616	0.197914	eukaryotic translation initiation factor 3 subunit B-like(LOC100214470)	hmg03013:RNA transport,		XP_002155584.2	LOC100214470		100214470	eukaryotic translation initiation factor 3 subunit B-like	GO:0002183|GO:0001731|GO:0001732|GO:0006446	cytoplasmic translational initiation|formation of translation preinitiation complex|formation of cytoplasmic translation initiation complex|regulation of translational initiation	GO:0003676|GO:0031369	nucleic acid binding|translation initiation factor binding	GO:0005737|GO:0016282|GO:0005852	cytoplasm|eukaryotic 43S preinitiation complex|eukaryotic translation initiation factor 3 complex
	LOC105850099	105850099	lncRNA	2.05719	683	1	0	4.11437
6087_0:0006c4	LOC100213814	100213814	protein_coding	2.05643	684	2	3.41698	0.695884	eukaryotic translation initiation factor 2 subunit 3, Y-linked(LOC100213814)	hmg03013:RNA transport,	IPR000795:Elongation factor, GTP-binding domain,IPR004161:Translation elongation factor EFTu/EF1A, domain 2,IPR009000:Translation elongation/initiation factor/Ribosomal, beta-barrel,IPR009001:Translation elongation factor EF1A/initiation factor IF2gamma, C-terminal,IPR015256:Translation initiation factor 2, gamma subunit, C-terminal,IPR027417:P-loop containing nucleoside triphosphate hydrolase,	XP_002162239.2	EIF2S3	T2MGF2	100213814	Eukaryotic translation initiation factor 2 subunit 3	GO:0001731|GO:0045903	formation of translation preinitiation complex|positive regulation of translational fidelity	GO:0005525|GO:0003924|GO:0031369|GO:0000049	GTP binding|GTPase activity|translation initiation factor binding|tRNA binding	GO:0043614|GO:0005850|GO:0016282	multi-eIF complex|eukaryotic translation initiation factor 2 complex|eukaryotic 43S preinitiation complex
6087_0:000c43	LOC100206654	100206654	protein_coding	2.05407	685	2	3.33009	0.778046				XP_002160050.2	LOC100206654		100206654	lysosome-associated membrane glycoprotein 1-like	GO:0050821	protein stabilization	GO:0019899|GO:0019904	enzyme binding|protein domain specific binding	GO:0044754|GO:0005765|GO:0005770|GO:0016021|GO:0005764|GO:0016020	autolysosome|lysosomal membrane|late endosome|integral component of membrane|lysosome|membrane
6087_0:001e1f	LOC100209458	100209458	protein_coding	2.05102	686	2	3.69679	0.405242	glutamine synthetase-like(LOC100209458)	hmg00220:Arginine biosynthesis,hmg00250:Alanine, aspartate and glutamate metabolism,hmg00630:Glyoxylate and dicarboxylate metabolism,hmg00910:Nitrogen metabolism,hmg01100:Metabolic pathways,hmg01230:Biosynthesis of amino acids,		XP_002157534.2	LOC100209458		100209458	glutamine synthetase-like	GO:0006807|GO:0006542	nitrogen compound metabolic process|glutamine biosynthetic process	GO:0004356|GO:0003824|GO:0005524|GO:0016874|GO:0000166	glutamate-ammonia ligase activity|catalytic activity|ATP binding|ligase activity|nucleotide binding
6087_0:000160	LOC100205020	100205020	protein_coding	2.04909	687	1	3.78149	0.3167	uncharacterized LOC100205020(LOC100205020)	hmg03010:Ribosome,		XP_012553945.1	LOC100205020		100205020	uncharacterized protein LOC100205020			GO:0008270	zinc ion binding	GO:0005622|GO:0015935	intracellular anatomical structure|small ribosomal subunit
6087_0:001d6c	LOC105844800	105844800	protein_coding	2.04749	688	1	4.09498	0				XP_012557263.1	LOC105844800		105844800	uncharacterized protein LOC105844800			GO:0003676	nucleic acid binding
6087_0:00401f	LOC100209159	100209159	protein_coding	2.04614	689	2	3.30406	0.788224				XP_002158860.1	LOC100209159		100209159	myophilin-like
6087_0:00107f	LOC100200891	100200891	protein_coding	2.0363	690	1	4.0726	0	translocating chain-associated membrane protein 1-like 1(LOC100200891)	hmg04141:Protein processing in endoplasmic reticulum,		XP_002167358.2	LOC100200891		100200891	translocating chain-associated membrane protein 1-like 1					GO:0016021|GO:0016020|GO:0005783	integral component of membrane|membrane|endoplasmic reticulum
6087_0:0037fd	LOC100203283	100203283	protein_coding	2.03562	691	1	4.07124	0				XP_012562615.1	LOC100203283		100203283	actin-related protein 3	GO:0007015|GO:0034314	actin filament organization|Arp2/3 complex-mediated actin nucleation	GO:0005524	ATP binding	GO:0005885	Arp2/3 protein complex
6087_0:000695	LOC100213121	100213121	protein_coding	2.03419	692	2	3.58394	0.484434	ATP-binding cassette sub-family E member 1(LOC100213121)		IPR003439:ABC transporter-like,IPR003593:AAA+ ATPase domain,IPR007209:RNase L inhibitor RLI, possible metal-binding domain,IPR013283:ABC transporter, ABCE,IPR017896:4Fe-4S ferredoxin-type, iron-sulpur binding domain,IPR017900:4Fe-4S ferredoxin, iron-sulphur binding, conserved site,IPR027417:P-loop containing nucleoside triphosphate hydrolase,	XP_002153953.1	ABCE1	T2MFD6	100213121	ATP-binding cassette sub-family E member 1			GO:0005524|GO:0000166	ATP binding|nucleotide binding	GO:0005737	cytoplasm
	LOC105850823	105850823	lncRNA	2.03355	693	1	0	4.0671
6087_0:000168	LOC101236702	101236702	protein_coding	2.02929	694	2	1.66075	2.39783				XP_004205553.2	LOC101236702		101236702	nephrocystin-1-like	GO:1903348	positive regulation of bicellular tight junction assembly			GO:0005911	cell-cell junction
6087_0:0000ed	LOC100208698	100208698	protein_coding	2.02764	695	2	3.59769	0.457595	eukaryotic translation initiation factor 3 subunit G-like(LOC100208698)	hmg03013:RNA transport,	IPR000504:RNA recognition motif domain,IPR012677:Nucleotide-binding, alpha-beta plait,IPR017334:Eukaryotic translation initiation factor 3 subunit G,IPR024675:Eukaryotic translation initiation factor 3 subunit G, N-terminal,	XP_002161908.1	EIF3G	T2MII9	100208698	Eukaryotic translation initiation factor 3 subunit G	GO:0002183|GO:0001732|GO:0001731|GO:0006446	cytoplasmic translational initiation|formation of cytoplasmic translation initiation complex|formation of translation preinitiation complex|regulation of translational initiation	GO:0003676	nucleic acid binding	GO:0071540|GO:0005737|GO:0016282|GO:0071541|GO:0005852	eukaryotic translation initiation factor 3 complex, eIF3e|cytoplasm|eukaryotic 43S preinitiation complex|eukaryotic translation initiation factor 3 complex, eIF3m|eukaryotic translation initiation factor 3 complex
6087_0:002218	LOC100199637	100199637	protein_coding	2.02217	696	1	4.04434	0	protein arginine N-methyltransferase 1-like(LOC100199637)	hmg04068:FoxO signaling pathway,		XP_002157035.1	LOC100199637		100199637	protein arginine N-methyltransferase 1-like	GO:0006479|GO:0032259	protein methylation|methylation	GO:0035242|GO:0016740	protein-arginine omega-N asymmetric methyltransferase activity|transferase activity	GO:0005829	cytosol
6087_0:0048b5	LOC101240588	101240588	protein_coding	2.01876	697	2	3.58082	0.456691	collagen alpha-1(IV) chain-like(LOC101240588)		IPR001442:Collagen IV, non-collagenous,IPR008160:Collagen triple helix repeat,IPR016187:C-type lectin fold,	XP_012565750.1	LOC101240588	Q9GQB1	101240588	Type IV collagen alpha 1 chain	GO:0038063	collagen-activated tyrosine kinase receptor signaling pathway	GO:0005201	extracellular matrix structural constituent	GO:0005587|GO:0005581	collagen type IV trimer|collagen trimer
6087_0:0043ac	LOC100209370	100209370	protein_coding	2.0151	698	2	3.55771	0.472481				XP_002157873.1	LOC100209370		100209370	universal stress protein A-like protein	GO:0006950	response to stress
6087_0:0013f5	LOC100204498	100204498	protein_coding	2.01417	699	2	2.96781	1.06052	cyclin-G1-like(LOC100204498)		IPR006671:Cyclin, N-terminal,IPR013763:Cyclin-like,	XP_002155469.1	CCNI	T2MDD4	100204498	Cyclin-I
6087_0:002e0e	LOC100198798	100198798	protein_coding	2.01401	700	1	3.86216	0.165856	spliceosome RNA helicase DDX39B-like(LOC100198798)	hmg03013:RNA transport,hmg03015:mRNA surveillance pathway,hmg03040:Spliceosome,	IPR001650:Helicase, C-terminal,IPR011545:DNA/RNA helicase, DEAD/DEAH box type, N-terminal,IPR014001:Helicase, superfamily 1/2, ATP-binding domain,IPR014014:RNA helicase, DEAD-box type, Q motif,IPR027417:P-loop containing nucleoside triphosphate hydrolase,	XP_002164853.1	DDX39B	T2MDK8	100198798	Spliceosome RNA helicase DDX39B	GO:0010468|GO:0006406|GO:0010501	regulation of gene expression|mRNA export from nucleus|RNA secondary structure unwinding	GO:0004004|GO:0005524|GO:0003676|GO:0042802	NA|ATP binding|nucleic acid binding|identical protein binding	GO:0005681|GO:0005737|GO:0005730|GO:0016607|GO:0005634|GO:0000346	spliceosomal complex|cytoplasm|nucleolus|nuclear speck|nucleus|transcription export complex
6087_0:002bc6	LOC100201603	100201603	protein_coding	2.01381	701	2	2.76447	1.26315	serine/threonine-protein phosphatase 2A catalytic subunit beta isoform(LOC100201603)	hmg03015:mRNA surveillance pathway,hmg04350:TGF-beta signaling pathway,		XP_004209578.1	LOC100201603		100201603	serine/threonine-protein phosphatase 2A catalytic subunit beta isoform	GO:0006470	protein dephosphorylation	GO:0004721|GO:0016787	phosphoprotein phosphatase activity|hydrolase activity
6087_0:003041	LOC100200666	100200666	protein_coding	2.00919	702	1	4.01838	0				XP_002156958.1	LOC100200666		100200666	uncharacterized protein LOC100200666
6087_0:000379	LOC100214065	100214065	protein_coding	2.00645	703	2	2.93477	1.07813				XP_002165252.2	LOC100214065		100214065	thioredoxin, mitochondrial-like	GO:0055114|GO:0006662	NA|glycerol ether metabolic process			GO:0005623	NA
6087_0:001a1c	LOC100204274	100204274	protein_coding	2.00536	704	2	2.23476	1.77597	claudin-18-like(LOC100204274)		IPR004031:PMP-22/EMP/MP20/Claudin,	XP_012556607.1	CLDNL1	A0A0H5FN67	100204274	Claudin-like 1			GO:0005198	structural molecule activity	GO:0016021|GO:0005923|GO:0016020	integral component of membrane|bicellular tight junction|membrane
	LOC105846410	105846410	lncRNA	2.00381	705	1	4.00762	0
6087_0:002284	LOC100211987	100211987	protein_coding	2.00307	706	1	3.90454	0.101591	collagen alpha-1(I) chain-like(LOC100211987)	hmg04512:ECM-receptor interaction,	IPR000885:Fibrillar collagen, C-terminal,IPR008160:Collagen triple helix repeat,IPR008197:Whey acidic protein-type 4-disulphide core,	XP_012558312.1	col2	A1XVT1	100211987	Fibrillar collagen	GO:0071230|GO:0030199	cellular response to amino acid stimulus|collagen fibril organization	GO:0005201|GO:0046332	extracellular matrix structural constituent|SMAD binding	GO:0005581|GO:0005615	collagen trimer|extracellular space
6087_0:002f9d	LOC100201793	100201793	protein_coding	1.99607	707	2	3.41953	0.572603				XP_002159865.1	LOC100201793		100201793	probable Bax inhibitor 1	GO:1904721|GO:0060702	NA|negative regulation of endoribonuclease activity			GO:0016020|GO:0016021	membrane|integral component of membrane
6087_0:003d1e	LOC105848159	105848159	protein_coding	1.99264	708	1	3.98529	0				XP_012563604.1	LOC105848159		105848159	uncharacterized protein LOC105848159
6087_0:000cf0	LOC100199273	100199273	protein_coding	1.98679	709	2	3.37524	0.598335	cytochrome c oxidase subunit NDUFA4-like(LOC100199273)	hmg00190:Oxidative phosphorylation,hmg01100:Metabolic pathways,	IPR010530:NADH-ubiquinone reductase complex 1 MLRQ subunit,	XP_002164791.1	NDUFA4	T2MIV0	100199273	NADH dehydrogenase					GO:0016020|GO:0016021	membrane|integral component of membrane
6087_0:003120	LOC100207704	100207704	protein_coding	1.98287	710	1	3.67354	0.292206	splicing factor U2AF 26 kDa subunit-like(LOC100207704)	hmg03040:Spliceosome,		XP_012561244.1	LOC100207704		100207704	splicing factor U2AF 26 kDa subunit-like isoform X2			GO:0003676|GO:0046872|GO:0030628	nucleic acid binding|metal ion binding|pre-mRNA 3'-splice site binding	GO:0089701|GO:0005681	U2AF complex|spliceosomal complex
6087_0:003a0d	LOC101234511	101234511	protein_coding	1.98236	711	1	3.75954	0.205178				XP_012563009.1	LOC101234511		101234511	uncharacterized protein LOC101234511
6087_0:002d3c	LOC105846351	105846351	protein_coding	1.97924	712	1	3.95847	0				XP_012560465.1	LOC105846351		105846351	roquin-1-like	GO:0010608|GO:0043029|GO:0010468|GO:0001782|GO:0048535|GO:0061470|GO:0048536	posttranscriptional regulation of gene expression|T cell homeostasis|regulation of gene expression|B cell homeostasis|lymph node development|T follicular helper cell differentiation|spleen development	GO:0046872|GO:0003729	metal ion binding|mRNA binding
6087_0:000a9a	LOC100204320	100204320	protein_coding	1.97167	713	2	3.07897	0.864363				XP_004206355.2	LOC100204320		100204320	src substrate cortactin-like					GO:0005737|GO:0005829	cytoplasm|cytosol
6087_0:003135	LOC100215796	100215796	protein_coding	1.96533	714	2	3.38682	0.543844				XP_002156680.2	LOC100215796		100215796	antistasin-like
6087_0:0000f2	LOC100202013	100202013	protein_coding	1.96353	715	2	3.33763	0.589423	eukaryotic translation initiation factor 3 subunit M-like(LOC100202013)		IPR000717:Proteasome component (PCI) domain,IPR011991:Winged helix-turn-helix DNA-binding domain,IPR027528:Eukaryotic translation initiation factor 3 subunit M,	XP_002164187.1	EIF3M	T2MAX5	100202013	Eukaryotic translation initiation factor 3 subunit M	GO:0002183|GO:0006446|GO:0001732|GO:0001731	cytoplasmic translational initiation|regulation of translational initiation|formation of cytoplasmic translation initiation complex|formation of translation preinitiation complex	GO:0005488	binding	GO:0071541|GO:0005737|GO:0005852|GO:0016282	eukaryotic translation initiation factor 3 complex, eIF3m|cytoplasm|eukaryotic translation initiation factor 3 complex|eukaryotic 43S preinitiation complex
6087_0:0023f2	LOC100202711	100202711	protein_coding	1.96147	716	2	3.36028	0.562655	eukaryotic translation initiation factor 1A, Y-chromosomal-like(LOC100202711)	hmg03013:RNA transport,	IPR001253:Translation initiation factor 1A (eIF-1A),IPR006196:RNA-binding domain, S1, IF1 type,IPR012340:Nucleic acid-binding, OB-fold,IPR018104:Translation initiation factor 1A (eIF-1A), conserved site,	XP_002157302.2	EIF1AY	T2MIS1	100202711	Eukaryotic translation initiation factor 1A, Y-chromosomal			GO:0003725	double-stranded RNA binding
6087_0:001e60	LOC100204298	100204298	protein_coding	1.95748	717	2	3.47867	0.436281	fumarate hydratase, mitochondrial-like(LOC100204298)	hmg00020:Citrate cycle (TCA cycle),hmg00620:Pyruvate metabolism,hmg01100:Metabolic pathways,hmg01130:Biosynthesis of antibiotics,hmg01200:Carbon metabolism,	IPR000362:Fumarate lyase,IPR005677:Fumarate hydratase, class II,IPR008948:L-Aspartase-like,IPR018951:Fumarase C, C-terminal,IPR020557:Fumarate lyase, conserved site,IPR022761:Fumarate lyase, N-terminal,IPR024083:Fumarase/histidase, N-terminal,	XP_002161201.1	FH	T2MH97	100204298	Fumarate hydratase, mitochondrial	GO:0006099|GO:0006106|GO:0006108	tricarboxylic acid cycle|fumarate metabolic process|malate metabolic process	GO:0016829|GO:0004333|GO:0003824	lyase activity|fumarate hydratase activity|catalytic activity	GO:0045239|GO:0005739	tricarboxylic acid cycle enzyme complex|mitochondrion
6087_0:0024e0	LOC100204358	100204358	protein_coding	1.95688	718	1	3.76778	0.145989	dolichyl-diphosphooligosaccharide--protein glycosyltransferase 48 kDa subunit-like(LOC100204358)	hmg00510:N-Glycan biosynthesis,hmg01100:Metabolic pathways,hmg04141:Protein processing in endoplasmic reticulum,	IPR005013:Dolichyl-diphosphooligosaccharide--protein glycosyltransferase subunit WBP1,	XP_002166630.2	DDOST	T2MFI6	100204358	Dolichyl-diphosphooligosaccharide--protein glycosyltransferase 48 kDa subunit	GO:0018279|GO:0006486	protein N-linked glycosylation via asparagine|protein glycosylation	GO:0016740	transferase activity	GO:0016021|GO:0005789|GO:0005783|GO:0016020	integral component of membrane|endoplasmic reticulum membrane|endoplasmic reticulum|membrane
6087_0:000b2f	LOC100213508	100213508	protein_coding	1.95596	719	2	3.32292	0.589008	V-type proton ATPase subunit G-like(LOC100213508)	hmg00190:Oxidative phosphorylation,hmg01100:Metabolic pathways,hmg04145:Phagosome,		XP_012553545.1	LOC100213508		100213508	V-type proton ATPase subunit G-like	GO:0015992|GO:0055085|GO:0006811	NA|transmembrane transport|ion transport	GO:0016820|GO:0008553	NA|proton-exporting ATPase activity, phosphorylative mechanism	GO:0016471	vacuolar proton-transporting V-type ATPase complex
	LOC105844623	105844623	lncRNA	1.95568	720	1	3.91136	0
6087_0:001676	LOC100204682	100204682	protein_coding	1.95227	721	1	3.63592	0.268623				XP_002156389.2	LOC100204682		100204682	basic leucine zipper and W2 domain-containing protein 1-like			GO:0045296|GO:0005488	cadherin binding|binding	GO:0005737	cytoplasm
6087_0:0008d7	LOC100209426	100209426	protein_coding	1.94989	722	2	3.43545	0.46434	60 kDa heat shock protein, mitochondrial-like(LOC100209426)	hmg03018:RNA degradation,		XP_012566842.1	LOC100209426		100209426	60 kDa heat shock protein, mitochondrial-like	GO:0061077|GO:0006458|GO:0008637|GO:0042026	chaperone-mediated protein folding|'de novo' protein folding|apoptotic mitochondrial changes|protein refolding	GO:0051082|GO:0044183|GO:0005524	unfolded protein binding|protein folding chaperone|ATP binding	GO:0005739|GO:0005829|GO:0005737	mitochondrion|cytosol|cytoplasm
6087_0:0018d6	LOC100210984	100210984	protein_coding	1.94312	723	2	3.46327	0.422962				XP_002162980.2	LOC100210984		100210984	heterogeneous nuclear ribonucleoprotein U-like isoform X1					GO:0005634	nucleus
6087_0:001765	LOC100203161	100203161	protein_coding	1.93725	724	1	3.72285	0.151653	protein disulfide-isomerase A3-like(LOC100203161)	hmg04141:Protein processing in endoplasmic reticulum,		XP_002160150.2	LOC100203161		100203161	protein disulfide-isomerase A3-like	GO:0034976	response to endoplasmic reticulum stress	GO:0016853	isomerase activity	GO:0005783	endoplasmic reticulum
6087_0:00142b	LOC100212665	100212665	protein_coding	1.93637	725	2	3.31794	0.5548	rRNA 2'-O-methyltransferase fibrillarin-like(LOC100212665)	hmg03008:Ribosome biogenesis in eukaryotes,		XP_002168049.2	LOC100212665		100212665	rRNA 2'-O-methyltransferase fibrillarin-like isoform X1	GO:0000494|GO:0031167|GO:0032259|GO:0008033|GO:1990258	box C/D RNA 3'-end processing|rRNA methylation|methylation|tRNA processing|histone glutamine methylation	GO:1990259|GO:0008649	histone-glutamine methyltransferase activity|rRNA methyltransferase activity	GO:0005730|GO:0032040|GO:0031428|GO:0015030|GO:0005634	nucleolus|small-subunit processome|box C/D RNP complex|Cajal body|nucleus
6087_0:002528	LOC101235428	101235428	protein_coding	1.93416	726	1	3.86833	0				XP_012558878.1	LOC101235428		101235428	tyrosine aminotransferase-like	GO:0009072	aromatic amino acid family metabolic process	GO:0008483|GO:0003824|GO:0030170|GO:0004838	transaminase activity|catalytic activity|pyridoxal phosphate binding|L-tyrosine:2-oxoglutarate aminotransferase activity
6087_0:00109f	LOC100215086	100215086	protein_coding	1.93214	727	1	3.58898	0.275295				XP_002169254.3	LOC100215086		100215086	uncharacterized protein LOC100215086	GO:0006796	phosphate-containing compound metabolic process	GO:0000287|GO:0004427	magnesium ion binding|inorganic diphosphatase activity	GO:0005737	cytoplasm
6087_0:002474	LOC100204686	100204686	protein_coding	1.93195	728	2	2.8117	1.05219	microtubule-associated proteins 1A/1B light chain 3C-like(LOC100204686)		IPR004241:Autophagy protein Atg8 ubiquitin-like,	XP_002163175.1	MAP1LC3C	T2M644	100204686	Microtubule-associated proteins 1A/1B light chain 3C	GO:0006995|GO:0000422|GO:0000045	cellular response to nitrogen starvation|autophagy of mitochondrion|autophagosome assembly			GO:0005776|GO:0000421|GO:0005829	autophagosome|autophagosome membrane|cytosol
6087_0:004950	LOC105849944	105849944	protein_coding	1.9309	729	2	3.3307	0.531103				XP_012565852.1	LOC105849944		105849944	synaptophysin-like protein 1					GO:0008021|GO:0016021|GO:0016020	synaptic vesicle|integral component of membrane|membrane
6087_0:003b49	LOC100201180	100201180	protein_coding	1.92952	730	1	3.70799	0.151047				XP_002169192.2	LOC100201180		100201180	uncharacterized protein LOC100201180			GO:0005509	calcium ion binding
6087_0:0002de	LOC100213125	100213125	protein_coding	1.92499	731	2	3.19444	0.655544				XP_012556904.1	LOC100213125		100213125	optineurin-like			GO:0070530|GO:0042802	K63-linked polyubiquitin modification-dependent protein binding|identical protein binding	GO:0005829	cytosol
6087_0:001f6b	LOC100200382	100200382	protein_coding	1.92419	732	2	3.41952	0.428852				XP_012557695.1	LOC100200382		100200382	protein phosphatase 1 regulatory subunit 12A-like			GO:0019901	protein kinase binding
6087_0:0013bd	LOC101241048	101241048	protein_coding	1.92398	733	2	3.13263	0.715332	mitochondrial import inner membrane translocase subunit Tim13-B-like(LOC101241048)		IPR004217:Tim10/DDP family zinc finger,	XP_004207235.1	TIMM13	T2M326	101241048	Mitochondrial import inner membrane translocase subunit Tim13	GO:0072321|GO:0045039	chaperone-mediated protein transport|protein insertion into mitochondrial inner membrane	GO:0046872	metal ion binding	GO:0042719|GO:0005739	mitochondrial intermembrane space protein transporter complex|mitochondrion
6087_0:0029c9	LOC101239703	101239703	protein_coding	1.91645	734	1	3.62296	0.209939				XP_012559789.1	LOC101239703		101239703	signal peptide, CUB and EGF-like domain-containing protein 2			GO:0005509	calcium ion binding	GO:0016021	integral component of membrane
6087_0:00460d	LOC100206107	100206107	protein_coding	1.91517	735	1	3.83034	0				XP_002154470.1	LOC100206107		100206107	histone H3.3	GO:0006334	nucleosome assembly	GO:0046982|GO:0031492	protein heterodimerization activity|nucleosomal DNA binding	GO:0005634|GO:0005694	nucleus|chromosome
6087_0:0004c6	LOC105846521	105846521	protein_coding	1.91005	736	2	3.30452	0.515574	sodium/potassium-transporting ATPase subunit alpha(LOC105846521)		IPR001757:Cation-transporting P-type ATPase,IPR004014:Cation-transporting P-type ATPase, N-terminal,IPR005775:Sodium/potassium-transporting P-type ATPase, subfamily IIC,IPR006068:Cation-transporting P-type ATPase, C-terminal,IPR008250:P-type ATPase, A domain,IPR018303:P-type ATPase, phosphorylation site,IPR023214:HAD-like domain,IPR023298:P-type ATPase, transmembrane domain,IPR023299:P-type ATPas…	XP_012560806.1	Na(+)/K(+) ATPase alpha subunit	P35317	105846521	Sodium/potassium-transporting ATPase subunit alpha			GO:0046872|GO:0016787|GO:0005524|GO:0000166|GO:0005391	metal ion binding|hydrolase activity|ATP binding|nucleotide binding|P-type sodium:potassium-exchanging ATPase activity	GO:0016020|GO:0016021	membrane|integral component of membrane
6087_0:000436	LOC100199013	100199013	protein_coding	1.9082	737	1	3.52154	0.294867				XP_002166837.1	LOC100199013		100199013	uncharacterized protein LOC100199013
6087_0:0005fe	LOC100200892	100200892	protein_coding	1.90485	738	2	3.4084	0.401296	eukaryotic translation initiation factor 3 subunit E-like(LOC100200892)	hmg03013:RNA transport,	IPR000717:Proteasome component (PCI) domain,IPR011991:Winged helix-turn-helix DNA-binding domain,IPR016650:Eukaryotic translation initiation factor 3 subunit E,IPR019010:Eukaryotic translation initiation factor 3 subunit E, N-terminal,	XP_012563116.1	EIF3E	T2MFB1	100200892	Eukaryotic translation initiation factor 3 subunit E	GO:0002183|GO:0006446|GO:0001732|GO:0001731	cytoplasmic translational initiation|regulation of translational initiation|formation of cytoplasmic translation initiation complex|formation of translation preinitiation complex			GO:0005852|GO:0016282|GO:0071540|GO:0005737|GO:0005634	eukaryotic translation initiation factor 3 complex|eukaryotic 43S preinitiation complex|eukaryotic translation initiation factor 3 complex, eIF3e|cytoplasm|nucleus
6087_0:0008ae	LOC100210078	100210078	protein_coding	1.902	739	2	1.97331	1.8307				XP_002159108.1	LOC100210078		100210078	uncharacterized protein LOC100210078
6087_0:0016f8	LOC100208802	100208802	protein_coding	1.89439	740	1	3.63814	0.150631				XP_012556001.1	LOC100208802		100208802	mucin-3A-like
6087_0:001cdb	LOC100207814	100207814	protein_coding	1.89284	741	1	3.70288	0.0828002				XP_012557152.1	LOC100207814		100207814	sarcoplasmic/endoplasmic reticulum calcium ATPase 2-like	GO:0099132|GO:0006816|GO:0070588	NA|calcium ion transport|calcium ion transmembrane transport	GO:0016787|GO:0005524|GO:0000166|GO:0046872|GO:0005388	hydrolase activity|ATP binding|nucleotide binding|metal ion binding|calcium transmembrane transporter activity, phosphorylative mechanism	GO:0016021|GO:0016020|GO:0033017	integral component of membrane|membrane|sarcoplasmic reticulum membrane
	LOC105845396	105845396	lncRNA	1.89211	742	2	2.46957	1.31465
6087_0:004a1b	LOC101240876	101240876	protein_coding	1.88891	743	1	3.77783	0				XP_004212829.2	LOC101240876		101240876	leucine-rich repeat protein SHOC-2-like
6087_0:002445	LOC100208033	100208033	protein_coding	1.87873	744	2	2.89419	0.863266	eukaryotic translation initiation factor 3 subunit H-like(LOC100208033)	hmg03013:RNA transport,		XP_012558705.1	LOC100208033		100208033	eukaryotic translation initiation factor 3 subunit H-like	GO:0001731|GO:0002183|GO:0001732	formation of translation preinitiation complex|cytoplasmic translational initiation|formation of cytoplasmic translation initiation complex			GO:0005737|GO:0005852|GO:0016282	cytoplasm|eukaryotic translation initiation factor 3 complex|eukaryotic 43S preinitiation complex
6087_0:000d61	LOC100199310	100199310	protein_coding	1.87856	745	2	3.23078	0.526332	flotillin-2-like(LOC100199310)		IPR001107:Band 7 protein,	XP_002161517.1	FLOT2	T2MDG4	100199310	Flotillin-2	GO:0050821|GO:0001765	protein stabilization|membrane raft assembly	GO:0046982	protein heterodimerization activity	GO:0044291|GO:0005768|GO:0030864|GO:0005913|GO:0001931|GO:0016600|GO:0045121|GO:0016020|GO:0030027|GO:0016323	cell-cell contact zone|endosome|cortical actin cytoskeleton|NA|uropod|flotillin complex|membrane raft|membrane|lamellipodium|basolateral plasma membrane
6087_0:002280	LOC100200225	100200225	protein_coding	1.87652	746	2	2.68332	1.06972				XP_002163611.1	LOC100200225		100200225	guanine nucleotide-binding protein G(s) subunit alpha-like			GO:0019001|GO:0005525|GO:0031683|GO:0003924	guanyl nucleotide binding|GTP binding|G-protein beta/gamma-subunit complex binding|GTPase activity
6087_0:000bff	LOC100203678	100203678	protein_coding	1.87214	747	1	3.57962	0.164662	clathrin heavy chain 1-like(LOC100203678)	hmg04142:Lysosome,hmg04144:Endocytosis,	IPR000547:Clathrin, heavy chain/VPS, 7-fold repeat,IPR001473:Clathrin, heavy chain, propeller, N-terminal,IPR011990:Tetratricopeptide-like helical,IPR012331:Clathrin, heavy chain, linker,IPR016024:Armadillo-type fold,IPR016025:Clathrin, heavy chain, linker/propeller domain,IPR016341:Clathrin, heavy chain,IPR022365:Clathrin, heavy chain, propeller repeat,	XP_012553712.1	CLTC	T2MEN5	100203678	Clathrin heavy chain	GO:0048268	clathrin coat assembly	GO:0032051|GO:0005198|GO:0005488	clathrin light chain binding|structural molecule activity|binding	GO:0005905|GO:0016020|GO:0030130|GO:0071439|GO:0030659|GO:0030132	clathrin-coated pit|membrane|clathrin coat of trans-Golgi network vesicle|clathrin complex|cytoplasmic vesicle membrane|clathrin coat of coated pit
6087_0:001f0c	LOC100208828	100208828	protein_coding	1.87205	748	2	3.07763	0.666477	dolichyl-diphosphooligosaccharide--protein glycosyltransferase subunit 2-like(LOC100208828)	hmg00510:N-Glycan biosynthesis,hmg01100:Metabolic pathways,hmg04141:Protein processing in endoplasmic reticulum,		XP_002166212.2	LOC100208828		100208828	dolichyl-diphosphooligosaccharide--protein glycosyltransferase subunit 2-like isoform X1	GO:0006487	protein N-linked glycosylation			GO:0008250|GO:0016021|GO:0016020	oligosaccharyltransferase complex|integral component of membrane|membrane
	LOC100206599	100206599		1.87153	749	2	3.02601	0.717044
	LOC101239781	101239781	lncRNA	1.86774	750	2	2.67078	1.0647
6087_0:004222	LOC100209501	100209501	protein_coding	1.8663	751	2	3.26121	0.471393	succinyl-CoA:3-ketoacid coenzyme A transferase 1, mitochondrial-like(LOC100209501)	hmg00072:Synthesis and degradation of ketone bodies,hmg00280:Valine, leucine and isoleucine degradation,hmg00650:Butanoate metabolism,		XP_012564519.1	LOC100209501		100209501	succinyl-CoA:3-ketoacid coenzyme A transferase 1, mitochondrial-like	GO:0046952	ketone body catabolic process	GO:0008260|GO:0008410|GO:0016740	3-oxoacid CoA-transferase activity|CoA-transferase activity|transferase activity	GO:0005739	mitochondrion
	LOC105849743	105849743	lncRNA	1.86526	752	1	3.73051	0
	LOC100201670	100201670	lncRNA	1.86421	753	2	2.4205	1.30793
6087_0:000cc9	LOC100198023	100198023	protein_coding	1.86011	754	1	3.72023	0				XP_004206552.1	LOC100198023		100198023	peptidyl-prolyl cis-trans isomerase B-like	GO:0000413	protein peptidyl-prolyl isomerization	GO:0016853	isomerase activity
6087_0:003ca2	LOC101238992	101238992	protein_coding	1.85981	755	2	3.15965	0.559965				XP_004211357.1	LOC101238992		101238992	inter-alpha-trypsin inhibitor heavy chain H3-like	GO:0030212|GO:0010951	hyaluronan metabolic process|negative regulation of endopeptidase activity	GO:0004867	serine-type endopeptidase inhibitor activity
6087_0:000a43	LOC100197494	100197494	protein_coding	1.8541	756	2	2.89548	0.812715				XP_002157397.2	LOC100197494		100197494	zinc metalloproteinase nas-6-like	GO:0006508	proteolysis	GO:0008270|GO:0008237|GO:0004222	zinc ion binding|metallopeptidase activity|metalloendopeptidase activity
6087_0:000c73	LOC100215962	100215962	protein_coding	1.84752	757	1	3.50305	0.191982	eukaryotic translation initiation factor 3 subunit I-like(LOC100215962)	hmg03013:RNA transport,	IPR001680:WD40 repeat,IPR015943:WD40/YVTN repeat-like-containing domain,IPR017986:WD40-repeat-containing domain,IPR019775:WD40 repeat, conserved site,IPR027525:Eukaryotic translation initiation factor 3 subunit I,	XP_002167671.1	EIF3I	T2ME18	100215962	Eukaryotic translation initiation factor 3 subunit I	GO:0001731|GO:0001732|GO:0006446|GO:0002183|GO:0071470|GO:0002188	formation of translation preinitiation complex|formation of cytoplasmic translation initiation complex|regulation of translational initiation|cytoplasmic translational initiation|cellular response to osmotic stress|translation reinitiation			GO:0005852|GO:0005737|GO:0034399|GO:0071540|GO:0071541|GO:0043614|GO:0016282|GO:0010494	eukaryotic translation initiation factor 3 complex|cytoplasm|nuclear periphery|eukaryotic translation initiation factor 3 complex, eIF3e|eukaryotic translation initiation factor 3 complex, eIF3m|multi-eIF complex|eukaryotic 43S preinitiation complex|cytoplasmic stress granule
6087_0:003513	LOC100206584	100206584	protein_coding	1.84218	758	1	3.68437	0				XP_002163750.3	LOC100206584		100206584	MKI67 FHA domain-interacting nucleolar phosphoprotein-like			GO:0003676	nucleic acid binding	GO:0000794|GO:0005737|GO:0005730|GO:0005654	condensed nuclear chromosome|cytoplasm|nucleolus|nucleoplasm
6087_0:002c61	LOC100205414	100205414	protein_coding	1.8415	759	1	3.68301	0	probable ribosome biogenesis protein RLP24(LOC100205414)	hmg03010:Ribosome,	IPR000988:Ribosomal protein L24e-related,IPR011017:TRASH domain,IPR023442:Ribosomal protein L24e, conserved site,IPR024546:Ribosome biogenesis protein RLP24,	XP_002155701.1	RSL24D1	T2M392	100205414	Probable ribosome biogenesis protein RLP24	GO:1902626|GO:0000027	assembly of large subunit precursor of preribosome|ribosomal large subunit assembly			GO:0005730|GO:0005634	nucleolus|nucleus
6087_0:001527	LOC100213259	100213259	protein_coding	1.83764	760	2	1.16517	2.51012				XP_012555621.1	LOC100213259		100213259	stress response protein NST1-like
	LOC105845548	105845548	lncRNA	1.83699	761	2	2.01578	1.65821
6087_0:00016f	LOC100208367	100208367	protein_coding	1.83591	762	1	3.30723	0.364595	zinc finger RNA-binding protein-like(LOC100208367)		IPR003604:Zinc finger, U1-type,IPR006561:DZF,IPR007087:Zinc finger, C2H2,IPR015880:Zinc finger, C2H2-like,	XP_002153846.1	ZFR	T2M7G0	100208367	Zinc finger RNA-binding protein			GO:0008270|GO:0003676	zinc ion binding|nucleic acid binding
6087_0:000a72	LOC100213621	100213621	protein_coding	1.8346	763	2	1.41486	2.25434				XP_002161843.1	LOC100213621		100213621	mitochondrial import receptor subunit TOM22 homolog	GO:0030150|GO:0045040	protein import into mitochondrial matrix|protein insertion into mitochondrial outer membrane			GO:0005741|GO:0031307|GO:0005742|GO:0016021	mitochondrial outer membrane|integral component of mitochondrial outer membrane|mitochondrial outer membrane translocase complex|integral component of membrane
6087_0:003c55	LOC100200849	100200849	protein_coding	1.83285	764	2	2.64968	1.01603	matrix metalloproteinase-14-like(LOC100200849)		IPR000585:Hemopexin-like domain,IPR001818:Peptidase M10, metallopeptidase,IPR002477:Peptidoglycan binding-like,IPR006026:Peptidase, metallopeptidase,IPR016293:Peptidase M10A, metazoans,IPR018486:Hemopexin, conserved site,IPR018487:Hemopexin-like repeats,IPR021190:Peptidase M10A,IPR024079:Metallopeptidase, catalytic domain,	XP_004211314.1	mmp	Q9U9P0	100200849	Matrix metalloproteinase	GO:0006508	proteolysis	GO:0008237|GO:0004222|GO:0046872|GO:0008270|GO:0008233|GO:0016787	metallopeptidase activity|metalloendopeptidase activity|metal ion binding|zinc ion binding|peptidase activity|hydrolase activity
6087_0:001bc0	LOC100206920	100206920	protein_coding	1.82704	765	2	3.24184	0.412243				XP_012556939.1	LOC100206920		100206920	uncharacterized protein LOC100206920					GO:0016021|GO:0016020	integral component of membrane|membrane
	LOC105844705	105844705	lncRNA	1.82586	766	1	3.65171	0
6087_0:000a41	LOC101238201	101238201	protein_coding	1.82558	767	2	2.69625	0.954914	dolichyl-diphosphooligosaccharide--protein glycosyltransferase subunit dad1-like(LOC101238201)	hmg00510:N-Glycan biosynthesis,hmg01100:Metabolic pathways,hmg04141:Protein processing in endoplasmic reticulum,	IPR003038:DAD/Ost2,	XP_004206328.1	DAD1	T2MF76	101238201	Dolichyl-diphosphooligosaccharide--protein glycosyltransferase subunit DAD1	GO:0006487|GO:0006486	protein N-linked glycosylation|protein glycosylation	GO:0016740|GO:0004579	transferase activity|dolichyl-diphosphooligosaccharide-protein glycotransferase activity	GO:0008250|GO:0005789|GO:0016021|GO:0016020|GO:0005783	oligosaccharyltransferase complex|endoplasmic reticulum membrane|integral component of membrane|membrane|endoplasmic reticulum
6087_0:004b4b	LOC100197804	100197804	protein_coding	1.82065	768	1	3.64129	0				XP_002166690.2	LOC100197804		100197804	aldose reductase-like	GO:0055114	NA	GO:0016491	oxidoreductase activity
6087_0:003dc2	LOC101241031	101241031	protein_coding	1.81109	769	2	3.02389	0.598295	heterogeneous nuclear ribonucleoprotein A/B-like(LOC101241031)		IPR000504:RNA recognition motif domain,IPR012677:Nucleotide-binding, alpha-beta plait,	XP_004211478.2	HNRNPD	T2MCZ2	101241031	Heterogeneous nuclear ribonucleoprotein D0			GO:0003676	nucleic acid binding
	LOC101237310	101237310	lncRNA	1.80689	770	1	3.61378	0
6087_0:003682	LOC101240412	101240412	protein_coding	1.80357	771	1	3.27634	0.3308				XP_012562317.1	LOC101240412		101240412	uncharacterized protein LOC101240412	GO:0006281|GO:0000723|GO:0032508|GO:0006310	DNA repair|telomere maintenance|DNA duplex unwinding|DNA recombination	GO:0005524|GO:0016787|GO:0004386|GO:0000166	ATP binding|hydrolase activity|helicase activity|nucleotide binding
6087_0:000946	LOC100206886	100206886	protein_coding	1.80114	772	2	2.89363	0.708642				XP_004206245.1	LOC100206886		100206886	myosin light chain 6B-like			GO:0005509	calcium ion binding
	LOC105847467	105847467	lncRNA	1.7972	773	1	3.5944	0
6087_0:003f18	LOC100203689	100203689	protein_coding	1.79639	774	1	3.59279	0	acidic leucine-rich nuclear phosphoprotein 32 family member B-like(LOC100203689)		IPR001611:Leucine-rich repeat,IPR003603:U2A'/phosphoprotein 32 family A, C-terminal,	XP_002157643.3	ANP32B	T2M8M9	100203689	Acidic leucine-rich nuclear phosphoprotein 32 family member B	GO:0042981|GO:0006334|GO:0043486	regulation of apoptotic process|nucleosome assembly|histone exchange	GO:0042393	histone binding	GO:0005634|GO:0005737	nucleus|cytoplasm
	LOC105847035	105847035	lncRNA	1.78745	775	1	3.5749	0
6087_0:002497	LOC105845490	105845490	protein_coding	1.78669	776	2	2.33414	1.23923	cytochrome b-c1 complex subunit 6, mitochondrial-like(LOC105845490)		IPR003422:Cytochrome b-c1 complex, subunit 6,IPR023184:Ubiquinol-cytochrome C reductase hinge domain,	XP_012558762.1	UQCRH	T2MHQ4	105845490	Cytochrome b-c1 complex subunit 6,mitochondrial	GO:0006122|GO:0009060	mitochondrial electron transport, ubiquinol to cytochrome c|aerobic respiration	GO:0008121	ubiquinol-cytochrome-c reductase activity	GO:0005739|GO:0070469|GO:0005743	mitochondrion|respirasome|mitochondrial inner membrane
6087_0:0005c6	LOC101236632	101236632	protein_coding	1.78626	777	1	3.57252	0				XP_012562787.1	LOC101236632		101236632	src substrate cortactin-like					GO:0005737|GO:0005829	cytoplasm|cytosol
6087_0:000e2b	LOC105843026	105843026	protein_coding	1.78615	778	2	2.61281	0.959484	interferon-stimulated gene 20 kDa protein-like(LOC105843026)		IPR012337:Ribonuclease H-like domain,IPR013520:Exonuclease, RNase T/DNA polymerase III,	XP_002158045.1	ISG20L2	T2M5T4	105843026	Interferon-stimulated 20 kDa exonuclease-like 2	GO:0090305	nucleic acid phosphodiester bond hydrolysis	GO:0003676|GO:0008408	nucleic acid binding|3'-5' exonuclease activity	GO:0005730|GO:0005634	nucleolus|nucleus
6087_0:00327b	LOC100208283	100208283	protein_coding	1.78611	779	2	1.73214	1.84007				XP_002161288.2	LOC100208283		100208283	universal stress protein A-like protein	GO:0006950	response to stress
6087_0:00334f	LOC101235471	101235471	protein_coding	1.77211	780	1	3.27493	0.269296				XP_012561661.1	LOC101235471		101235471	SE-cephalotoxin-like
6087_0:001037	LOC100208285	100208285	protein_coding	1.77187	781	1	3.45484	0.0889002				XP_012554603.1	LOC100208285		100208285	uncharacterized protein LOC100208285			GO:0005509	calcium ion binding	GO:0016021	integral component of membrane
6087_0:00431a	LOC100201685	100201685	protein_coding	1.76777	782	2	3.08824	0.447309				XP_002166699.3	LOC100201685		100201685	myophilin-like
6087_0:004e34	ND5		protein_coding	1.76775	783	1	3.5355	0				YP_002221531.1	ND5	B4F7M6	6904230	NADH-ubiquinone oxidoreductase chain 5	GO:0055114|GO:0042773	NA|ATP synthesis coupled electron transport	GO:0008137|GO:0016491	NADH dehydrogenase (ubiquinone) activity|oxidoreductase activity	GO:0016021|GO:0016020|GO:0005743|GO:0070469|GO:0005739	integral component of membrane|membrane|mitochondrial inner membrane|respirasome|mitochondrion
	LOC105847083	105847083	lncRNA	1.76658	784	1	3.53315	0
	LOC100212687	100212687	misc_RNA	1.76356	785	2	2.56243	0.964686
6087_0:000689	LOC100208251	100208251	protein_coding	1.76317	786	1	3.52633	0				XP_002164641.1	LOC100208251		100208251	chymotrypsin-like elastase family member 3B	GO:0006508	proteolysis	GO:0004252|GO:0008236|GO:0016787|GO:0008233	serine-type endopeptidase activity|serine-type peptidase activity|hydrolase activity|peptidase activity
	LOC105844254	105844254	lncRNA	1.76234	787	2	0.605788	2.9189
6087_0:001580	LOC101235550	101235550	protein_coding	1.75968	788	1	3.51937	0				XP_012555688.1	LOC101235550		101235550	probable methylmalonate-semialdehyde dehydrogenase	GO:0055114	NA	GO:0004491|GO:0016491|GO:0016620	methylmalonate-semialdehyde dehydrogenase (acylating) activity|oxidoreductase activity|oxidoreductase activity, acting on the aldehyde or oxo group of donors, NAD or NADP as acceptor	GO:0005739	mitochondrion
	LOC105848488	105848488		1.75385	789	1	3.50769	0
	LOC100197030	100197030	lncRNA	1.75202	790	1	3.50405	0
6087_0:001677	LOC100208227	100208227	protein_coding	1.74957	791	2	2.97366	0.525483	actin-related protein 2/3 complex subunit 2-like(LOC100208227)	hmg04144:Endocytosis,	IPR007188:ARP2/3 complex, 34kDa subunit (p34-Arc),	XP_012555889.1	ARPC2	T2MIZ1	100208227	Arp2/3 complex 34 kDa subunit	GO:0030833|GO:0030036|GO:0006898|GO:0034314|GO:0000226|GO:0030041	regulation of actin filament polymerization|actin cytoskeleton organization|receptor-mediated endocytosis|Arp2/3 complex-mediated actin nucleation|microtubule cytoskeleton organization|actin filament polymerization	GO:0005198|GO:0003779|GO:0005200|GO:0051015	structural molecule activity|actin binding|structural constituent of cytoskeleton|actin filament binding	GO:0005885|GO:0005856|GO:0005829|GO:0015629|GO:0005737	Arp2/3 protein complex|cytoskeleton|cytosol|actin cytoskeleton|cytoplasm
6087_0:002d02	LOC100205218	100205218	protein_coding	1.7485	792	1	3.49701	0	collagen alpha-1(IV) chain-like(LOC100205218)	hmg04512:ECM-receptor interaction,		XP_012560414.1	LOC100205218		100205218	collagen alpha-1(IV) chain-like	GO:0038063	collagen-activated tyrosine kinase receptor signaling pathway	GO:0005201	extracellular matrix structural constituent	GO:0005587|GO:0005581	collagen type IV trimer|collagen trimer
6087_0:002c3e	LOC105846261	105846261	protein_coding	1.74792	793	2	2.65122	0.844619	diphosphoinositol polyphosphate phosphohydrolase 1-like(LOC105846261)		IPR000086:NUDIX hydrolase domain,IPR015797:NUDIX hydrolase domain-like,IPR020084:NUDIX hydrolase, conserved site,IPR020476:NUDIX hydrolase,	XP_012560262.1	NUDT3	T2MHL6	105846261	Diphosphoinositol polyphosphate phosphohydrolase 1	GO:1901911|GO:1901907|GO:1901909|GO:0071543	adenosine 5'-(hexahydrogen pentaphosphate) catabolic process|diadenosine pentaphosphate catabolic process|diadenosine hexaphosphate catabolic process|diphosphoinositol polyphosphate metabolic process	GO:0016787|GO:0008486|GO:0000298|GO:0034432|GO:0050072|GO:0034431	hydrolase activity|diphosphoinositol-polyphosphate diphosphatase activity|endopolyphosphatase activity|bis(5'-adenosyl)-pentaphosphatase activity|m7G(5')pppN diphosphatase activity|bis(5'-adenosyl)-hexaphosphatase activity	GO:0005634|GO:0005737	nucleus|cytoplasm
6087_0:002711	LOC100198427	100198427	protein_coding	1.74615	794	1	3.13575	0.35655				XP_002166847.1	LOC100198427		100198427	uncharacterized protein LOC100198427
6087_0:004aa1	LOC105850154	105850154	protein_coding	1.74236	795	2	2.48614	0.998585				XP_012566095.1	LOC105850154		105850154	L-rhamnose-binding lectin CSL3-like	GO:0007166	cell surface receptor signaling pathway			GO:0016020|GO:0016021	membrane|integral component of membrane
6087_0:003fa4	LOC101235346	101235346	protein_coding	1.74212	796	1	3.40359	0.0806498				XP_012564072.1	LOC101235346		101235346	protein mesh-like	GO:0007160	cell-matrix adhesion			GO:0016021	integral component of membrane
6087_0:004014	LOC100211318	100211318	protein_coding	1.73915	797	2	2.83222	0.646084				XP_012564150.1	LOC100211318		100211318	stomatin-like protein 2, mitochondrial					GO:0016020|GO:0005739|GO:0045121	membrane|mitochondrion|membrane raft
6087_0:0037c0	LOC100204215	100204215	protein_coding	1.73633	798	2	1.46888	2.00378				XP_012562563.1	LOC100204215		100204215	transmembrane protein 59-like	GO:0090285|GO:0010955|GO:0010508	negative regulation of protein glycosylation in Golgi|negative regulation of protein processing|positive regulation of autophagy			GO:0000138|GO:0016021|GO:0005797|GO:0005770|GO:0000137|GO:0005764|GO:0016020	Golgi trans cisterna|integral component of membrane|Golgi medial cisterna|late endosome|Golgi cis cisterna|lysosome|membrane
6087_0:001257	LOC100197380	100197380	protein_coding	1.73456	799	2	2.56197	0.907148	endothelial differentiation-related factor 1 homolog(LOC100197380)		IPR001387:Helix-turn-helix,IPR010982:Lambda repressor-like, DNA-binding domain,IPR013729:Multiprotein bridging factor 1, N-terminal,	XP_002165088.2	EDF1	T2MIV7	100197380	Endothelial differentiation-related factor 1			GO:0043565	sequence-specific DNA binding
6087_0:000c37	LOC101238946	101238946	protein_coding	1.73423	800	1	3.46847	0				XP_004206499.1	LOC101238946		101238946	putative uncharacterized protein DDB_G0284695	GO:0032298|GO:0051457	positive regulation of DNA-dependent DNA replication initiation|maintenance of protein location in nucleus	GO:0003676|GO:0030332|GO:0008270	nucleic acid binding|cyclin binding|zinc ion binding	GO:0005654|GO:0005634	nucleoplasm|nucleus
	LOC105848630	105848630	lncRNA	1.73322	801	1	3.46644	0
6087_0:0045fd	LOC100208172	100208172	protein_coding	1.73014	802	1	3.07307	0.387208				XP_012565249.1	LOC100208172		100208172	mucin-2-like	GO:0007166	cell surface receptor signaling pathway			GO:0016021|GO:0016020	integral component of membrane|membrane
6087_0:001df3	LOC100208955	100208955	protein_coding	1.72883	803	2	2.98331	0.474352				XP_002155675.1	LOC100208955		100208955	eukaryotic translation initiation factor 4H-like	GO:0097010|GO:0001731	eukaryotic translation initiation factor 4F complex assembly|formation of translation preinitiation complex	GO:0034057|GO:0043024|GO:0033592|GO:0003676	RNA strand-exchange activity|ribosomal small subunit binding|RNA strand annealing activity|nucleic acid binding	GO:0016281|GO:0005844	eukaryotic translation initiation factor 4F complex|polysome
6087_0:000516	LOC100200826	100200826	protein_coding	1.72649	804	2	2.76636	0.686611	ras-related protein ORAB-1(LOC100200826)		IPR001806:Small GTPase superfamily,IPR005225:Small GTP-binding protein domain,IPR027417:P-loop containing nucleoside triphosphate hydrolase,	XP_012561294.1	RAB1A	T2MEK8	100200826	Ras-related protein Rab-1A			GO:0005525|GO:0003924	GTP binding|GTPase activity	GO:0005789|GO:0000139	endoplasmic reticulum membrane|Golgi membrane
6087_0:000f55	LOC100197385	100197385	protein_coding	1.72573	805	2	2.80062	0.650849	dolichyl-diphosphooligosaccharide--protein glycosyltransferase subunit 1-like(LOC100197385)	hmg00510:N-Glycan biosynthesis,hmg01100:Metabolic pathways,hmg04141:Protein processing in endoplasmic reticulum,	IPR007676:Ribophorin I,	XP_002157282.1	RPN1	T2MHV5	100197385	Dolichyl-diphosphooligosaccharide--protein glycosyltransferase subunit 1	GO:0006486|GO:0018279	protein glycosylation|protein N-linked glycosylation via asparagine	GO:0016740|GO:0004579	transferase activity|dolichyl-diphosphooligosaccharide-protein glycotransferase activity	GO:0005783|GO:0005789|GO:0016021|GO:0016020|GO:0008250	endoplasmic reticulum|endoplasmic reticulum membrane|integral component of membrane|membrane|oligosaccharyltransferase complex
6087_0:00073b	LOC100211305	100211305	protein_coding	1.72098	806	1	3.15552	0.286444				XP_004206050.1	LOC100211305		100211305	sequestosome-1-like			GO:0008270|GO:0042802|GO:0043130	zinc ion binding|identical protein binding|ubiquitin binding	GO:0005776|GO:0016235	autophagosome|aggresome
6087_0:0032a1	LOC105846912	105846912	protein_coding	1.72024	807	1	3.44048	0				XP_012561527.1	LOC105846912		105846912	uncharacterized protein LOC105846912					GO:0016021	integral component of membrane
6087_0:001f6c	LOC100197981	100197981	protein_coding	1.71843	808	2	2.79185	0.645018				XP_012557696.1	LOC100197981		100197981	protein phosphatase 1 regulatory subunit 12A-like isoform X1			GO:0019901	protein kinase binding
	LOC100202054	100202054	lncRNA	1.71506	809	2	2.95862	0.471499
6087_0:004386	LOC100206681	100206681	protein_coding	1.70823	810	2	2.59191	0.82454	fructose-1,6-bisphosphatase 1-like(LOC100206681)	hmg00010:Glycolysis / Gluconeogenesis,hmg00030:Pentose phosphate pathway,hmg00051:Fructose and mannose metabolism,hmg01100:Metabolic pathways,hmg01130:Biosynthesis of antibiotics,hmg01200:Carbon metabolism,		XP_002164544.3	LOC100206681		100206681	fructose-1,6-bisphosphatase 1-like	GO:0016311|GO:0030388|GO:0006000|GO:0006094|GO:0006002|GO:0005986	dephosphorylation|fructose 1,6-bisphosphate metabolic process|fructose metabolic process|gluconeogenesis|fructose 6-phosphate metabolic process|sucrose biosynthetic process	GO:0042132|GO:0016787|GO:0042578|GO:0042802	fructose 1,6-bisphosphate 1-phosphatase activity|hydrolase activity|phosphoric ester hydrolase activity|identical protein binding	GO:0005829	cytosol
6087_0:001452	LOC100214093	100214093	protein_coding	1.70684	811	2	2.19846	1.21523	arfaptin-2-like(LOC100214093)		IPR010504:Arfaptin homology (AH) domain,IPR027267:Arfaptin homology (AH) domain/BAR domain,	XP_012555452.1	ARFIP2	T2MF64	100214093	Arfaptin-2	GO:0034315	regulation of Arp2/3 complex-mediated actin nucleation	GO:0019904	protein domain specific binding	GO:0005737	cytoplasm
6087_0:003e2c	LOC100206764	100206764	protein_coding	1.70546	812	2	2.58355	0.82737	eukaryotic translation initiation factor 6-like(LOC100206764)	hmg03008:Ribosome biogenesis in eukaryotes,		XP_002155665.3	LOC100206764		100206764	eukaryotic translation initiation factor 6-like	GO:0042273|GO:0042256|GO:0000054|GO:0000470|GO:0000460|GO:1902626	ribosomal large subunit biogenesis|mature ribosome assembly|ribosomal subunit export from nucleus|maturation of LSU-rRNA|maturation of 5.8S rRNA|assembly of large subunit precursor of preribosome	GO:0043023	ribosomal large subunit binding	GO:0005730|GO:0005634|GO:0005737|GO:0005829|GO:0030687	nucleolus|nucleus|cytoplasm|cytosol|preribosome, large subunit precursor
6087_0:001d2c	LOC100205952	100205952	protein_coding	1.70405	813	1	3.2678	0.140297	aspartate--tRNA ligase, cytoplasmic-like(LOC100205952)	hmg00970:Aminoacyl-tRNA biosynthesis,		XP_012557218.1	LOC100205952		100205952	aspartate--tRNA ligase, cytoplasmic-like	GO:0006418|GO:0006422	tRNA aminoacylation for protein translation|aspartyl-tRNA aminoacylation	GO:0000166|GO:0003676|GO:0005524|GO:0004815	nucleotide binding|nucleic acid binding|ATP binding|aspartate-tRNA ligase activity	GO:0005737|GO:0017101	cytoplasm|aminoacyl-tRNA synthetase multienzyme complex
6087_0:003d13	LOC101241207	101241207	protein_coding	1.69999	814	2	2.57943	0.82056				XP_004211408.2	LOC101241207		101241207	glutathione peroxidase-like	GO:0006979|GO:0055114|GO:0098869	response to oxidative stress|NA|cellular oxidant detoxification	GO:0016491	oxidoreductase activity
6087_0:003191	LOC100203647	100203647	protein_coding	1.69999	815	2	2.53562	0.864363				XP_012561336.1	LOC100203647		100203647	chitotriosidase-1-like			GO:0016798|GO:0016787|GO:0008061	hydrolase activity, acting on glycosyl bonds|hydrolase activity|chitin binding
	LOC105845848	105845848	lncRNA	1.69142	816	1	3.38284	0
6087_0:003e17	LOC100201130	100201130	protein_coding	1.68905	817	2	2.73445	0.643645	uncharacterized LOC100201130(LOC100201130)	hmg03018:RNA degradation,		XP_012563774.1	LOC100201130		100201130	uncharacterized protein LOC100201130	GO:0008285|GO:0006479	negative regulation of cell population proliferation|protein methylation
6087_0:002dba	LOC100197357	100197357	protein_coding	1.68844	818	2	2.84462	0.532269	ras-related protein Rap-1b-like(LOC100197357)		IPR001806:Small GTPase superfamily,IPR005225:Small GTP-binding protein domain,IPR020849:Small GTPase superfamily, Ras type,IPR027417:P-loop containing nucleoside triphosphate hydrolase,	XP_002156934.1	RAP1B	T2MET6	100197357	Ras-related protein Rap-1b	GO:0071320|GO:0032486|GO:0061028|GO:1901888	cellular response to cAMP|Rap protein signal transduction|establishment of endothelial barrier|regulation of cell junction assembly	GO:0005525|GO:0003924|GO:0000166	GTP binding|GTPase activity|nucleotide binding	GO:0016020	membrane
6087_0:00183c	LOC100205899	100205899	protein_coding	1.6855	819	1	3.14381	0.227193	ADP-ribosylation factor 4(LOC100205899)		IPR005225:Small GTP-binding protein domain,IPR006689:Small GTPase superfamily, ARF/SAR type,IPR024156:Small GTPase superfamily, ARF type,IPR027417:P-loop containing nucleoside triphosphate hydrolase,	XP_002161663.1	ARF5	T2MDU7	100205899	ADP-ribosylation factor 5	GO:0007264	small GTPase mediated signal transduction	GO:0000166|GO:0005525	nucleotide binding|GTP binding	GO:0005622|GO:0005737	intracellular anatomical structure|cytoplasm
6087_0:001d56	LOC100206278	100206278	protein_coding	1.68449	820	1	3.36898	0				XP_002159484.1	LOC100206278		100206278	prefoldin subunit 5-like			GO:0051082	unfolded protein binding	GO:0016272|GO:0005829|GO:0005634|GO:0032153|GO:0051286|GO:0005737	prefoldin complex|cytosol|nucleus|cell division site|cell tip|cytoplasm
6087_0:000cd2	LOC100203652	100203652	protein_coding	1.68017	821	2	2.9363	0.424039	V-type proton ATPase subunit B(LOC100203652)	hmg00190:Oxidative phosphorylation,hmg01100:Metabolic pathways,hmg04145:Phagosome,		XP_002160955.1	LOC100203652		100203652	V-type proton ATPase subunit B	GO:0046034|GO:0015991	ATP metabolic process|NA	GO:0016820|GO:0005524	NA|ATP binding	GO:0033180|GO:0005829|GO:0005902|GO:0005737	proton-transporting V-type ATPase, V1 domain|cytosol|microvillus|cytoplasm
	LOC105850338	105850338	lncRNA	1.67824	822	2	1.28657	2.06991
6087_0:002cd4	LOC100214012	100214012	protein_coding	1.67518	823	1	3.35036	0				XP_012560377.1	LOC100214012		100214012	salivary glue protein Sgs-3-like	GO:0006508	proteolysis	GO:0008270|GO:0008237|GO:0004222	zinc ion binding|metallopeptidase activity|metalloendopeptidase activity
6087_0:003c0b	LOC100192251	100192251	protein_coding	1.67439	824	2	2.9183	0.430481				XP_012563414.1	LOC100192251		100192251	lamin-L(I)			GO:0005198	structural molecule activity	GO:0005882	intermediate filament
6087_0:0016d1	LOC100214855	100214855	protein_coding	1.67271	825	1	3.00392	0.34151	ATP synthase subunit O, mitochondrial-like(LOC100214855)	hmg00190:Oxidative phosphorylation,hmg01100:Metabolic pathways,		XP_002167376.1	LOC100214855		100214855	ATP synthase subunit O, mitochondrial-like	GO:0015986|GO:0099132	ATP synthesis coupled proton transport|NA	GO:0046933	proton-transporting ATP synthase activity, rotational mechanism	GO:0016020|GO:0000274	membrane|mitochondrial proton-transporting ATP synthase, stator stalk
6087_0:0016c1	LOC100214281	100214281	protein_coding	1.67243	826	2	2.92177	0.423098	NADH dehydrogenase [ubiquinone] 1 alpha subcomplex subunit 6-like(LOC100214281)	hmg00190:Oxidative phosphorylation,hmg01100:Metabolic pathways,	IPR008011:Complex 1 LYR protein,IPR016488:NADH dehydrogenase [ubiquinone] (complex I), alpha subcomplex, subunit 6,	XP_002161890.2	NDUFA6	T2MFE2	100214281	NADH dehydrogenase	GO:0006979	response to oxidative stress			GO:0005739|GO:0031966	mitochondrion|mitochondrial membrane
6087_0:0019fb	LOC100203527	100203527	protein_coding	1.66803	827	2	2.46381	0.872243	small nuclear ribonucleoprotein Sm D2-like(LOC100203527)	hmg03040:Spliceosome,	IPR001163:Ribonucleoprotein LSM domain,IPR010920:Like-Sm (LSM) domain,IPR027248:Small nuclear ribonucleoprotein Sm D2,	XP_002158231.1	SNRPD2	T2MF62	100203527	Small nuclear ribonucleoprotein Sm D2	GO:0000387	spliceosomal snRNP assembly			GO:0030532|GO:0071013|GO:0005682|GO:0005685|GO:0071011|GO:0046540|GO:0005686	small nuclear ribonucleoprotein complex|catalytic step 2 spliceosome|U5 snRNP|U1 snRNP|precatalytic spliceosome|U4/U6 x U5 tri-snRNP complex|U2 snRNP
	LOC100198438	100198438	lncRNA	1.66673	828	1	3.33345	0
6087_0:0006b2	LOC100207902	100207902	protein_coding	1.66389	829	2	1.85285	1.47492				XP_002164043.2	LOC100207902		100207902	protein NPC2 homolog	GO:0032367	intracellular cholesterol transport			GO:0005622	intracellular anatomical structure
6087_0:0006b9	kazal2		protein_coding	1.66381	830	2	2.77449	0.553133				NP_001267786.1	kazal2	B8Y8I5	100202281	Kazal-type serine protease inihibitor 2
6087_0:00005b	LOC100209405	100209405	protein_coding	1.66026	831	1	2.92521	0.39531	methylmalonyl-CoA mutase, mitochondrial-like(LOC100209405)	hmg00280:Valine, leucine and isoleucine degradation,hmg00630:Glyoxylate and dicarboxylate metabolism,hmg00640:Propanoate metabolism,hmg01100:Metabolic pathways,hmg01200:Carbon metabolism,	IPR006098:Methylmalonyl-CoA mutase, alpha chain, catalytic,IPR006099:Methylmalonyl-CoA mutase, alpha/beta chain, catalytic,IPR006158:Cobalamin (vitamin B12)-binding domain,IPR006159:Methylmalonyl-CoA mutase, C-terminal,IPR014348:Cobalamin (vitamin B12)-dependent enzyme, catalytic subdomain,IPR016176:Cobalamin (vitamin B12)-dependent enzyme, catalytic,	XP_002158942.2	MUT	T2MH37	100209405	Methylmalonyl-CoA mutase,mitochondrial	GO:0050667	homocysteine metabolic process	GO:0004494|GO:0072341|GO:0003924|GO:0042802|GO:0016866|GO:0003824|GO:0046872|GO:0042803|GO:0031419|GO:0016853	methylmalonyl-CoA mutase activity|modified amino acid binding|GTPase activity|identical protein binding|intramolecular transferase activity|catalytic activity|metal ion binding|protein homodimerization activity|cobalamin binding|isomerase activity	GO:0005739	mitochondrion
	LOC105850706	105850706	lncRNA	1.65454	832	1	3.30908	0
6087_0:003721	LOC100215977	100215977	protein_coding	1.6516	833	2	2.1579	1.14531	ATP synthase subunit d, mitochondrial-like(LOC100215977)	hmg00190:Oxidative phosphorylation,hmg01100:Metabolic pathways,		XP_002153970.1	LOC100215977		100215977	ATP synthase subunit d, mitochondrial-like	GO:0099132|GO:0015986|GO:0006811	NA|ATP synthesis coupled proton transport|ion transport	GO:0015078|GO:0046933	proton transmembrane transporter activity|proton-transporting ATP synthase activity, rotational mechanism	GO:0000276|GO:0000274|GO:0016020|GO:0005739|GO:0005743	mitochondrial proton-transporting ATP synthase complex, coupling factor F(o)|mitochondrial proton-transporting ATP synthase, stator stalk|membrane|mitochondrion|mitochondrial inner membrane
6087_0:003d48	LOC100211936	100211936	protein_coding	1.64983	834	1	3.29967	0	histone H2A(LOC100211936)		IPR002119:Histone H2A,IPR007125:Histone core,IPR009072:Histone-fold,	XP_002158325.1	H2AFX	T2MHB3	100211936	Histone H2A			GO:0046982	protein heterodimerization activity	GO:0005694|GO:0005634|GO:0000790	chromosome|nucleus|NA
6087_0:00229b	LOC100204643	100204643	protein_coding	1.64913	835	2	2.89736	0.400891	eukaryotic translation initiation factor 4 gamma 1-like(LOC100204643)	hmg03013:RNA transport,		XP_012558336.1	LOC100204643		100204643	eukaryotic translation initiation factor 4 gamma 1-like			GO:0003729|GO:0005488	mRNA binding|binding
6087_0:0047f3	LOC105849717	105849717	protein_coding	1.64722	836	1	3.29444	0				XP_012565601.1	LOC105849717		105849717	uncharacterized protein LOC105849717	GO:0006281|GO:0000723|GO:0032508|GO:0006310	DNA repair|telomere maintenance|DNA duplex unwinding|DNA recombination	GO:0005524|GO:0016787|GO:0004386|GO:0000166	ATP binding|hydrolase activity|helicase activity|nucleotide binding
	LOC105849319	105849319	lncRNA	1.6427	837	1	3.2854	0
6087_0:001eaf	LOC100213133	100213133	protein_coding	1.6419	838	2	2.86845	0.415346	coiled-coil domain-containing protein 86-like(LOC100213133)		IPR005579:Cgr1,IPR026570:Coiled-coil domain-containing protein 86,	XP_004208300.1	CCDC86	T2M5Z7	100213133	Coiled-coil domain-containing protein 86					GO:0005730	nucleolus
6087_0:001dd8	LOC100197468	100197468	protein_coding	1.63999	839	2	2.31269	0.967282	F-actin-capping protein subunit beta-like(LOC100197468)	hmg04144:Endocytosis,	IPR001698:WASH complex, F-actin capping protein, beta subunit,IPR019771:F-actin capping protein, beta subunit, conserved site,	XP_002164225.1	CAPZB	T2MG38	100197468	F-actin-capping protein subunit beta	GO:0030036|GO:0051016|GO:0010591|GO:0051490	actin cytoskeleton organization|barbed-end actin filament capping|regulation of lamellipodium assembly|negative regulation of filopodium assembly	GO:0003779|GO:0051015	actin binding|actin filament binding	GO:0008290|GO:0005737|GO:0005884	F-actin capping protein complex|cytoplasm|actin filament
6087_0:00237b	LOC100214123	100214123	protein_coding	1.63914	840	1	2.88054	0.397738	heterogeneous nuclear ribonucleoprotein Q-like(LOC100214123)		IPR000504:RNA recognition motif domain,IPR006535:HnRNP R/Q splicing factor,IPR012677:Nucleotide-binding, alpha-beta plait,	XP_002157894.2	SYNCRIP	T2MIY0	100214123	Heterogeneous nuclear ribonucleoprotein Q			GO:0003676	nucleic acid binding	GO:0071013	catalytic step 2 spliceosome
6087_0:001f6e	LOC100214665	100214665	protein_coding	1.63805	841	1	3.2761	0				XP_012557694.1	LOC100214665		100214665	protein phosphatase 1 regulatory subunit 12A-like			GO:0019901|GO:0019208	protein kinase binding|phosphatase regulator activity
6087_0:0000e8	LOC100204601	100204601	protein_coding	1.63676	842	2	1.53186	1.74166				XP_002159263.1	LOC100204601		100204601	hydralysin-like
	LOC100197230	100197230	lncRNA	1.63664	843	2	2.4175	0.855779
6087_0:001b8d	LOC100210460	100210460	protein_coding	1.63384	844	1	2.91176	0.35593				XP_002161787.3	LOC100210460		100210460	protein phosphatase 1A-like	GO:0006470	protein dephosphorylation	GO:0046872|GO:0000287|GO:0030145|GO:0003824|GO:0004721|GO:0016787|GO:0043169	metal ion binding|magnesium ion binding|manganese ion binding|catalytic activity|phosphoprotein phosphatase activity|hydrolase activity|cation binding
6087_0:000d4f	LOC100213389	100213389	protein_coding	1.63363	845	1	3.21001	0.0572479				XP_012553986.1	LOC100213389		100213389	fibronectin type III domain-containing protein-like					GO:0016021	integral component of membrane
6087_0:002b9d	LOC105846204	105846204	protein_coding	1.63195	846	1	3.2639	0				XP_012560139.1	LOC105846204		105846204	uncharacterized proline-rich protein-like
6087_0:000788	LOC101240463	101240463	protein_coding	1.6299	847	1	3.2598	0				XP_012565865.1	LOC101240463		101240463	uncharacterized protein LOC101240463
6087_0:000bd0	LOC100199767	100199767	protein_coding	1.62916	848	1	3.25833	0				XP_002165607.1	LOC100199767		100199767	uncharacterized protein LOC100199767	GO:0006030	chitin metabolic process	GO:0008061	chitin binding	GO:0005576	extracellular region
6087_0:001b64	LOC100202552	100202552	protein_coding	1.62614	849	1	3.08067	0.171618				XP_012556860.1	LOC100202552		100202552	major vault protein-like	GO:0023051|GO:0038127|GO:0061099|GO:0023057|GO:0031953	regulation of signaling|ERBB signaling pathway|negative regulation of protein tyrosine kinase activity|negative regulation of signaling|negative regulation of protein autophosphorylation	GO:0019901|GO:0019903|GO:0042802	protein kinase binding|protein phosphatase binding|identical protein binding	GO:0005737|GO:0016021|GO:0005634|GO:0005856|GO:0005829|GO:0048471	cytoplasm|integral component of membrane|nucleus|cytoskeleton|cytosol|perinuclear region of cytoplasm
6087_0:003a7a	LOC100198483	100198483	protein_coding	1.62386	850	1	3.24772	0				XP_012563102.1	LOC100198483		100198483	sortilin-related receptor-like	GO:1902966|GO:0014910|GO:1902997|GO:0006892|GO:0032091|GO:1902955|GO:0006622|GO:0045732|GO:1901215|GO:0006605|GO:1902960|GO:0070863|GO:0032460|GO:1902948|GO:0043407|GO:1902953|GO:2001137|GO:1902430|GO:0045053|GO:1902963|GO:1902771|GO:0051604|GO:0050768	positive regulation of protein localization to early endosome|regulation of smooth muscle cell migration|negative regulation of neurofibrillary tangle assembly|post-Golgi vesicle-mediated transport|negative regulation of protein binding|positive regulation of early endosome to recycling endosome transport|protein targeting to lysosome|positive regulation of protein catabolic process|negative regu…	GO:0001540|GO:0030306|GO:0030169	amyloid-beta binding|NA|low-density lipoprotein particle binding	GO:0016021|GO:0016020|GO:0005794|GO:0005769|GO:0005802|GO:0005783|GO:0005615|GO:0031985|GO:0005768|GO:0055037	integral component of membrane|membrane|Golgi apparatus|early endosome|trans-Golgi network|endoplasmic reticulum|extracellular space|Golgi cisterna|endosome|recycling endosome
6087_0:000a01	LOC100199298	100199298	protein_coding	1.62001	851	1	2.91469	0.325336				XP_012567076.1	LOC100199298		100199298	uncharacterized protein LOC100199298 isoform X3					GO:0016020|GO:0016021	membrane|integral component of membrane
6087_0:002fad	LOC100215777	100215777	protein_coding	1.61401	852	2	2.40747	0.82056				XP_002168214.2	LOC100215777		100215777	N-alpha-acetyltransferase 15, NatA auxiliary subunit-like	GO:0006474|GO:0050821|GO:0017196	N-terminal protein amino acid acetylation|protein stabilization|N-terminal peptidyl-methionine acetylation			GO:0005737|GO:0005829|GO:0031415	cytoplasm|cytosol|NatA complex
6087_0:000b7a	LOC100207098	100207098	protein_coding	1.61326	853	1	2.86258	0.36393	legumain-like(LOC100207098)	hmg04142:Lysosome,		XP_012553606.1	LOC100207098		100207098	legumain-like	GO:0043524|GO:0006508|GO:0051603|GO:0006624	negative regulation of neuron apoptotic process|proteolysis|proteolysis involved in cellular protein catabolic process|vacuolar protein processing	GO:0004197|GO:0008233	cysteine-type endopeptidase activity|peptidase activity	GO:0005773	vacuole
	LOC101239827	101239827	lncRNA	1.60925	854	1	3.2185	0
6087_0:0037d7	LOC100209667	100209667	protein_coding	1.60833	855	1	3.21666	0				XP_002167712.3	LOC100209667		100209667	uncharacterized protein LOC100209667
6087_0:0028d6	LOC105845903	105845903	protein_coding	1.60572	856	1	3.02132	0.190113				XP_012559596.1	LOC105845903		105845903	uncharacterized protein LOC105845903
6087_0:001428	LOC100197245	100197245	protein_coding	1.6053	857	2	1.46175	1.74885	ATP synthase subunit g, mitochondrial-like(LOC100197245)	hmg00190:Oxidative phosphorylation,hmg01100:Metabolic pathways,		XP_002161310.1	LOC100197245		100197245	ATP synthase subunit g, mitochondrial-like	GO:0099132|GO:0015986	NA|ATP synthesis coupled proton transport	GO:0015078	proton transmembrane transporter activity	GO:0000276	mitochondrial proton-transporting ATP synthase complex, coupling factor F(o)
6087_0:003c0e	LOC100202931	100202931	protein_coding	1.60211	858	2	2.69923	0.504997				XP_002165104.1	LOC100202931		100202931	peroxiredoxin-1-like	GO:0055114|GO:0098869	NA|cellular oxidant detoxification	GO:0016209|GO:0016491|GO:0051920	antioxidant activity|oxidoreductase activity|peroxiredoxin activity	GO:0005623	NA
6087_0:003810	LOC100200375	100200375	protein_coding	1.60191	859	1	2.8265	0.377322				XP_002166594.2	LOC100200375		100200375	postacrosomal sheath WW domain-binding protein-like	GO:0071391|GO:0045815	cellular response to estrogen stimulus|positive regulation of gene expression, epigenetic	GO:0001105	NA	GO:0000790	NA
6087_0:00002c	LOC100197708	100197708	protein_coding	1.6017	860	1	2.84209	0.36132				XP_002161622.1	LOC100197708		100197708	probable splicing factor, arginine/serine-rich 5			GO:0003676|GO:0008270	nucleic acid binding|zinc ion binding
6087_0:00035a	LOC100209990	100209990	protein_coding	1.60021	861	1	3.20042	0				XP_002154939.1	LOC100209990		100209990	asparagine-rich protein-like
6087_0:003de0	LOC105848244	105848244	protein_coding	1.59688	862	1	3.0494	0.144352				XP_012563732.1	LOC105848244		105848244	mucin-2-like
6087_0:004b41	LOC105850268	105850268	protein_coding	1.59602	863	2	2.41817	0.773867				XP_012566192.1	LOC105850268		105850268	tumor protein p53-inducible nuclear protein 2-like	GO:0000045	autophagosome assembly			GO:0005634|GO:0005776	nucleus|autophagosome
6087_0:001f9a	LOC100204502	100204502	protein_coding	1.59207	864	1	2.81116	0.372976				XP_002166012.3	LOC100204502		100204502	BPTI/Kunitz domain-containing protein 4-like
6087_0:000a27	LOC100204126	100204126	protein_coding	1.58972	865	1	2.99629	0.183141	alpha-N-acetylgalactosaminidase-like(LOC100204126)	hmg00603:Glycosphingolipid biosynthesis - globo series,hmg04142:Lysosome,		XP_002159485.2	LOC100204126		100204126	LOW QUALITY PROTEIN: alpha-N-acetylgalactosaminidase-like	GO:0046477	glycosylceramide catabolic process	GO:0003824|GO:0004557|GO:0016798|GO:0052692|GO:0016787	catalytic activity|alpha-galactosidase activity|hydrolase activity, acting on glycosyl bonds|raffinose alpha-galactosidase activity|hydrolase activity	GO:0005737	cytoplasm
6087_0:002ac4	LOC101240230	101240230	protein_coding	1.58652	866	1	3.17305	0				XP_012559968.1	LOC101240230		101240230	uncharacterized protein LOC101240230	GO:0000723|GO:0006281|GO:0032508|GO:0006310	telomere maintenance|DNA repair|DNA duplex unwinding|DNA recombination	GO:0005524|GO:0016787|GO:0004386|GO:0000166	ATP binding|hydrolase activity|helicase activity|nucleotide binding
6087_0:001dd7	LOC100209209	100209209	protein_coding	1.584	867	2	2.40411	0.763889	AP-2 complex subunit mu-like(LOC100209209)	hmg04144:Endocytosis,		XP_012557354.1	LOC100209209		100209209	AP-2 complex subunit mu-like			GO:0008289	lipid binding	GO:0030131|GO:0016020	clathrin adaptor complex|membrane
6087_0:000568	LOC101241426	101241426	protein_coding	1.58203	868	2	2.06583	1.09823				XP_004205890.1	LOC101241426		101241426	peptidyl-prolyl cis-trans isomerase FKBP2-like	GO:0000413|GO:0061077	protein peptidyl-prolyl isomerization|chaperone-mediated protein folding	GO:0016853|GO:0005528	isomerase activity|FK506 binding	GO:0005737	cytoplasm
6087_0:001812	LOC100201630	100201630	protein_coding	1.57996	869	2	2.42046	0.739469	aldehyde dehydrogenase, mitochondrial(LOC100201630)	hmg00010:Glycolysis / Gluconeogenesis,hmg00053:Ascorbate and aldarate metabolism,hmg00071:Fatty acid degradation,hmg00280:Valine, leucine and isoleucine degradation,hmg00310:Lysine degradation,hmg00330:Arginine and proline metabolism,hmg00340:Histidine metabolism,hmg00380:Tryptophan metabolism,hmg00410:beta-Alanine metabolism,hmg00561:Glycerolipid metabolism,hmg00620:Pyruvate metabolism,hmg01100:…	IPR015590:Aldehyde dehydrogenase domain,IPR016160:Aldehyde dehydrogenase, conserved site,IPR016161:Aldehyde/histidinol dehydrogenase,IPR016162:Aldehyde dehydrogenase, N-terminal,IPR016163:Aldehyde dehydrogenase, C-terminal,	XP_002157914.2	ALDH2	T2MHV0	100201630	Aldehyde dehydrogenase,mitochondrial	GO:0055114	NA	GO:0016620|GO:0016491|GO:0004029	oxidoreductase activity, acting on the aldehyde or oxo group of donors, NAD or NADP as acceptor|oxidoreductase activity|aldehyde dehydrogenase (NAD+) activity
6087_0:000c70	LOC100214438	100214438	protein_coding	1.57747	870	1	3.15495	0				XP_002157952.2	LOC100214438		100214438	dual specificity protein phosphatase 16-like	GO:0016311|GO:0006470|GO:0035335|GO:0000188	dephosphorylation|protein dephosphorylation|peptidyl-tyrosine dephosphorylation|inactivation of MAPK activity	GO:0004725|GO:0008138|GO:0017017	protein tyrosine phosphatase activity|protein tyrosine/serine/threonine phosphatase activity|MAP kinase tyrosine/serine/threonine phosphatase activity
6087_0:000241	LOC105844083	105844083	protein_coding	1.57632	871	2	1.33374	1.81889				XP_012555710.1	LOC105844083		105844083	integral membrane protein DGCR2/IDD-like isoform X1					GO:0016021	integral component of membrane
	LOC105845307	105845307	lncRNA	1.57374	872	1	3.14748	0
6087_0:001e6a	LOC101236048	101236048	protein_coding	1.57123	873	1	2.82173	0.320733				XP_004208273.2	LOC101236048		101236048	NADH-ubiquinone oxidoreductase 75 kDa subunit, mitochondrial-like
6087_0:00477a	LOC101238504	101238504	protein_coding	1.56818	874	1	3.13636	0				XP_004212515.1	LOC101238504		101238504	thrombospondin-1-like	GO:0006030	chitin metabolic process	GO:0008061	chitin binding	GO:0005576	extracellular region
6087_0:003987	LOC100206178	100206178	protein_coding	1.5656	875	1	2.96855	0.162643	acid ceramidase-like(LOC100206178)	hmg00600:Sphingolipid metabolism,hmg01100:Metabolic pathways,hmg04142:Lysosome,	IPR016699:Acid ceramidase-like,	XP_002158866.2	ASAH1	T2MDI0	100206178	Acid ceramidase	GO:0006629	lipid metabolic process			GO:0005764	lysosome
6087_0:003b41	LOC100202905	100202905	protein_coding	1.56346	876	1	3.12692	0				XP_002158329.3	LOC100202905		100202905	uncharacterized protein LOC100202905
6087_0:0014e0	LOC100207310	100207310	protein_coding	1.56131	877	1	2.73878	0.383832	lysine--tRNA ligase-like(LOC100207310)	hmg00970:Aminoacyl-tRNA biosynthesis,		XP_012555564.1	LOC100207310		100207310	lysine--tRNA ligase-like	GO:0006430|GO:0006418	lysyl-tRNA aminoacylation|tRNA aminoacylation for protein translation	GO:0005524|GO:0000166|GO:0004824|GO:0003676	ATP binding|nucleotide binding|lysine-tRNA ligase activity|nucleic acid binding	GO:0005737	cytoplasm
6087_0:000edf	LOC101238576	101238576	protein_coding	1.55679	878	2	2.68079	0.43278				XP_012554323.1	LOC101238576		101238576	PERQ amino acid-rich with GYF domain-containing protein 2-like	GO:0016441|GO:0007631|GO:0021522|GO:0008344|GO:0031571|GO:0061157|GO:0048873|GO:0044267|GO:0035264|GO:0048009|GO:0050885|GO:0009791|GO:0050881	posttranscriptional gene silencing|feeding behavior|spinal cord motor neuron differentiation|adult locomotory behavior|mitotic G1 DNA damage checkpoint|mRNA destabilization|homeostasis of number of cells within a tissue|cellular protein metabolic process|multicellular organism growth|insulin-like growth factor receptor signaling pathway|neuromuscular process controlling balance|post-embryonic dev…	GO:0070064|GO:0045296	proline-rich region binding|cadherin binding	GO:0010494|GO:0005737|GO:0005829|GO:0043204|GO:0005768|GO:0005783|GO:1990635|GO:0005794|GO:0016021	cytoplasmic stress granule|cytoplasm|cytosol|perikaryon|endosome|endoplasmic reticulum|proximal dendrite|Golgi apparatus|integral component of membrane
6087_0:003b71	LOC100215630	100215630	protein_coding	1.55153	879	1	3.10306	0				XP_012563294.1	LOC100215630		100215630	low-density lipoprotein receptor-related protein 4-like	GO:1902966|GO:0014910|GO:1902997|GO:0006892|GO:0032091|GO:1902955|GO:0006622|GO:0045732|GO:1901215|GO:0006605|GO:1902960|GO:0070863|GO:0032460|GO:1902948|GO:0043407|GO:1902953|GO:2001137|GO:1902430|GO:0045053|GO:1902963|GO:1902771|GO:0051604|GO:0050768	positive regulation of protein localization to early endosome|regulation of smooth muscle cell migration|negative regulation of neurofibrillary tangle assembly|post-Golgi vesicle-mediated transport|negative regulation of protein binding|positive regulation of early endosome to recycling endosome transport|protein targeting to lysosome|positive regulation of protein catabolic process|negative regu…	GO:0001540|GO:0030306|GO:0030169	amyloid-beta binding|NA|low-density lipoprotein particle binding	GO:0016021|GO:0016020|GO:0005794|GO:0005769|GO:0005802|GO:0005783|GO:0005615|GO:0031985|GO:0005768|GO:0055037	integral component of membrane|membrane|Golgi apparatus|early endosome|trans-Golgi network|endoplasmic reticulum|extracellular space|Golgi cisterna|endosome|recycling endosome
6087_0:002765	LOC100205676	100205676	protein_coding	1.5499	880	1	3.09979	0				XP_002165372.2	LOC100205676		100205676	uncharacterized protein LOC100205676
6087_0:001094	LOC100205318	100205318	protein_coding	1.54917	881	1	2.90069	0.197647	transitional endoplasmic reticulum ATPase-like(LOC100205318)	hmg04141:Protein processing in endoplasmic reticulum,		XP_012554675.1	LOC100205318		100205318	LOW QUALITY PROTEIN: transitional endoplasmic reticulum ATPase-like			GO:0005524|GO:0016787	ATP binding|hydrolase activity
6087_0:002ac9	LOC100210743	100210743	protein_coding	1.54795	882	2	2.42561	0.670289				XP_002166224.1	LOC100210743		100210743	ELAV-like protein 3			GO:0003676	nucleic acid binding
6087_0:002fe4	LOC100207808	100207808	protein_coding	1.54732	883	2	1.93764	1.157	cytochrome c oxidase subunit 5A, mitochondrial-like(LOC100207808)	hmg00190:Oxidative phosphorylation,hmg01100:Metabolic pathways,	IPR003204:Cytochrome c oxidase, subunit Va/VI,	XP_002163813.1	COX5A	T2MGM7	100207808	Cytochrome c oxidase subunit 5A,mitochondrial	GO:0022900|GO:0006123	electron transport chain|mitochondrial electron transport, cytochrome c to oxygen	GO:0004129	cytochrome-c oxidase activity	GO:0005743	mitochondrial inner membrane
6087_0:0010d3	LOC101239596	101239596	protein_coding	1.54505	884	2	2.57769	0.512417				XP_004206921.1	LOC101239596		101239596	calnexin-like			GO:0051082|GO:0005509	unfolded protein binding|calcium ion binding	GO:0016021|GO:0005783|GO:0016020	integral component of membrane|endoplasmic reticulum|membrane
6087_0:000f06	LOC100201751	100201751	protein_coding	1.54479	885	2	1.65664	1.43293				XP_002155532.2	LOC100201751		100201751	rab GDP dissociation inhibitor alpha-like	GO:0007264	small GTPase mediated signal transduction	GO:0005092|GO:0005093|GO:0016491	GDP-dissociation inhibitor activity|Rab GDP-dissociation inhibitor activity|oxidoreductase activity	GO:0005737|GO:0005622	cytoplasm|intracellular anatomical structure
6087_0:001a61	LOC105844510	105844510	protein_coding	1.54439	886	1	3.08878	0				XP_012556664.1	LOC105844510		105844510	transmembrane protein 115-like	GO:0006486	protein glycosylation	GO:0004252|GO:0042802	serine-type endopeptidase activity|identical protein binding	GO:0016020|GO:0016021|GO:0017119|GO:0032580|GO:0005794|GO:0005634	membrane|integral component of membrane|Golgi transport complex|Golgi cisterna membrane|Golgi apparatus|nucleus
6087_0:004384	LOC100212614	100212614	protein_coding	1.54405	887	1	2.80886	0.279248				XP_012564779.1	LOC100212614		100212614	sialate O-acetylesterase-like	GO:0002682	regulation of immune system process	GO:0001681	sialate O-acetylesterase activity
6087_0:003faa	LOC100206620	100206620	protein_coding	1.54252	888	2	2.55575	0.52928				XP_002167031.3	LOC100206620		100206620	putative leucine-rich repeat-containing protein DDB_G0290503					GO:0005773	vacuole
	LOC100207370	100207370	lncRNA	1.54177	889	1	3.08354	0
6087_0:001404	LOC100208464	100208464	protein_coding	1.54167	890	2	2.61651	0.466828				XP_012555394.1	LOC100208464		100208464	carboxypeptidase D-like isoform X1	GO:0006508	proteolysis	GO:0008270|GO:0004181	zinc ion binding|metallocarboxypeptidase activity	GO:0005615	extracellular space
6087_0:0033c1	LOC100213119	100213119	protein_coding	1.54132	891	1	2.97978	0.102864				XP_012561761.1	LOC100213119		100213119	integrin beta-2-like	GO:0007229|GO:0007160	integrin-mediated signaling pathway|cell-matrix adhesion			GO:0016021|GO:0016020|GO:0008305	integral component of membrane|membrane|integrin complex
6087_0:000524	LOC100212418	100212418	protein_coding	1.54002	892	1	2.77835	0.301692	RNA-binding protein Nova-1-like(LOC100212418)		IPR004087:K Homology domain,IPR004088:K Homology domain, type 1,	XP_002164819.1	NOVA2	T2M3N5	100212418	RNA-binding protein Nova-2			GO:0003676	nucleic acid binding
6087_0:003b08	LOC100205648	100205648	protein_coding	1.53945	893	1	2.71903	0.359865	dolichyl-diphosphooligosaccharide--protein glycosyltransferase subunit STT3B(LOC100205648)	hmg00510:N-Glycan biosynthesis,hmg01100:Metabolic pathways,hmg04141:Protein processing in endoplasmic reticulum,	IPR003674:Oligosaccharyl transferase, STT3 subunit,	XP_002162870.3	STT3B	T2M9F1	100205648	Dolichyl-diphosphooligosaccharide--protein glycosyltransferase subunit STT3B	GO:0006486|GO:0018279|GO:0043687	protein glycosylation|protein N-linked glycosylation via asparagine|post-translational protein modification	GO:0004576|GO:0004579	oligosaccharyl transferase activity|dolichyl-diphosphooligosaccharide-protein glycotransferase activity	GO:0016020|GO:0016021|GO:0008250	membrane|integral component of membrane|oligosaccharyltransferase complex
6087_0:001cc9	LOC100215656	100215656	protein_coding	1.53913	894	1	3.07826	0	serine/threonine-protein phosphatase 2A 65 kDa regulatory subunit A alpha isoform(LOC100215656)	hmg03015:mRNA surveillance pathway,hmg04350:TGF-beta signaling pathway,		XP_002162841.2	LOC100215656		100215656	serine/threonine-protein phosphatase 2A 65 kDa regulatory subunit A alpha isoform			GO:0005488	binding
6087_0:001279	LOC100200350	100200350	protein_coding	1.53882	895	2	2.59264	0.485008				XP_012555074.1	LOC100200350		100200350	UPF0472 protein C16orf72-like
6087_0:004345	LOC101236121	101236121	protein_coding	1.53396	896	1	3.06792	0				XP_012564734.1	LOC101236121		101236121	ubiquitin carboxyl-terminal hydrolase 4-like			GO:0004843|GO:0036459	thiol-dependent ubiquitin-specific protease activity|NA	GO:0005829	cytosol
6087_0:003e71	LOC100208817	100208817	protein_coding	1.53314	897	2	1.60563	1.46066	alcohol dehydrogenase class-3-like(LOC100208817)	hmg00010:Glycolysis / Gluconeogenesis,hmg00071:Fatty acid degradation,hmg00350:Tyrosine metabolism,hmg00830:Retinol metabolism,hmg00980:Metabolism of xenobiotics by cytochrome P450,hmg00982:Drug metabolism - cytochrome P450,hmg01100:Metabolic pathways,hmg01130:Biosynthesis of antibiotics,hmg01200:Carbon metabolism,hmg01220:Degradation of aromatic compounds,		XP_012563841.1	LOC100208817		100208817	alcohol dehydrogenase class-3-like	GO:0055114|GO:0006069	NA|ethanol oxidation	GO:0016491|GO:0046872|GO:0008270|GO:0051903	oxidoreductase activity|metal ion binding|zinc ion binding|S-(hydroxymethyl)glutathione dehydrogenase activity
	LOC105849720	105849720	lncRNA	1.53221	898	1	3.06442	0
6087_0:003514	LOC100215902	100215902	protein_coding	1.53216	899	2	2.25547	0.808849				XP_002157414.3	LOC100215902		100215902	endoplasmic reticulum-Golgi intermediate compartment protein 3-like isoform X1					GO:0016021|GO:0016020	integral component of membrane|membrane
6087_0:000ebf	LOC100199140	100199140	protein_coding	1.53042	900	1	2.94333	0.117512				XP_012554296.1	LOC100199140		100199140	CUGBP Elav-like family member 2 isoform X1			GO:0003676	nucleic acid binding	GO:0005737	cytoplasm
	LOC105849928	105849928	lncRNA	1.52964	901	2	2.15968	0.899605
	LOC105847510	105847510	lncRNA	1.52888	902	1	3.05776	0
	LOC105847889	105847889	lncRNA	1.52745	903	1	3.0549	0
6087_0:004225	LOC100215776	100215776	protein_coding	1.52688	904	1	3.05376	0				XP_012564522.1	LOC100215776		100215776	ATP-dependent DNA helicase PIF1-like	GO:0006281|GO:0000723|GO:0032508|GO:0006310	DNA repair|telomere maintenance|DNA duplex unwinding|DNA recombination	GO:0005524|GO:0016787|GO:0004386|GO:0000166	ATP binding|hydrolase activity|helicase activity|nucleotide binding
	gnai3		protein_coding	1.52517	905	2	2.53438	0.515957
6087_0:0007f3	LOC100209747	100209747	protein_coding	1.52397	906	1	2.88331	0.164634	contactin-associated protein-like 2(LOC100209747)		IPR000152:EGF-type aspartate/asparagine hydroxylation site,IPR000742:Epidermal growth factor-like domain,IPR001791:Laminin G domain,IPR013320:Concanavalin A-like lectin/glucanase, subgroup,	XP_012566545.1	CNTNAP2	T2M432	100209747	Contactin-associated protein-like 2					GO:0016021|GO:0016020	integral component of membrane|membrane
	LOC105850559	105850559	lncRNA	1.52232	908	1	3.04464	0
	LOC105849718	105849718	lncRNA	1.52232	908	1	3.04464	0
	LOC105850627	105850627	lncRNA	1.52232	908	1	3.04464	0
6087_0:001478	LOC100206357	100206357	protein_coding	1.51922	910	1	2.86969	0.168744				XP_002159068.2	LOC100206357		100206357	PC3-like endoprotease variant B	GO:0006508	proteolysis	GO:0004252|GO:0008233	serine-type endopeptidase activity|peptidase activity	GO:0016020|GO:0016021	membrane|integral component of membrane
6087_0:0043b2	LOC100205991	100205991	protein_coding	1.51802	911	2	1.30503	1.73102				XP_004212092.1	LOC100205991		100205991	uncharacterized protein LOC100205991
6087_0:0042da	LOC100204764	100204764	protein_coding	1.51741	912	1	3.03482	0				XP_002169141.3	LOC100204764		100204764	next to BRCA1 gene 1 protein-like	GO:0030500|GO:0045668|GO:0032872	regulation of bone mineralization|negative regulation of osteoblast differentiation|regulation of stress-activated MAPK cascade	GO:0043130|GO:0051019|GO:0008270	ubiquitin binding|mitogen-activated protein kinase binding|zinc ion binding	GO:0005829|GO:0016604|GO:0005739|GO:0000407|GO:0005770|GO:0005654|GO:0043231|GO:0005776	cytosol|nuclear body|mitochondrion|phagophore assembly site|late endosome|nucleoplasm|intracellular membrane-bounded organelle|autophagosome
6087_0:002d11	LOC100198930	100198930	protein_coding	1.51355	913	1	3.0271	0				XP_012560424.1	LOC100198930		100198930	cathepsin L1-like isoform X1	GO:0006508	proteolysis
6087_0:003ce7	LOC101237703	101237703	protein_coding	1.51116	914	1	3.02232	0				XP_012563556.1	LOC101237703		101237703	eukaryotic translation initiation factor 3 subunit C-like
	LOC105850785	105850785	lncRNA	1.50808	915	1	3.01615	0
6087_0:002b61	LOC101238155	101238155	protein_coding	1.50544	916	2	1.78946	1.22142				XP_004209541.1	LOC101238155		101238155	fibroblast growth factor 1-like	GO:0008284|GO:0008543|GO:0010469	positive regulation of cell population proliferation|fibroblast growth factor receptor signaling pathway|regulation of signaling receptor activity	GO:0008083	growth factor activity	GO:0005576	extracellular region
	LOC105847454	105847454	lncRNA	1.50477	917	1	3.00955	0
6087_0:000567	LOC100210272	100210272	protein_coding	1.50351	918	1	2.90875	0.0982706	protein transport protein Sec23B-like(LOC100210272)	hmg04141:Protein processing in endoplasmic reticulum,		XP_002156026.2	LOC100210272		100210272	protein transport protein Sec23B-like	GO:0090114	COPII-coated vesicle budding	GO:0008270	zinc ion binding	GO:0048471|GO:0030127|GO:0000139	perinuclear region of cytoplasm|COPII vesicle coat|Golgi membrane
6087_0:0034d2	LOC100208395	100208395	protein_coding	1.50116	919	2	2.2779	0.724413				XP_002158754.1	LOC100208395		100208395	flagellar calcium-binding protein TB-44A-like			GO:0005509	calcium ion binding
6087_0:00023a	LOC100209664	100209664	protein_coding	1.49533	920	1	2.99066	0				XP_002162861.1	LOC100209664		100209664	uncharacterized protein LOC100209664	GO:0007275	multicellular organism development			GO:0005615|GO:0005576	extracellular space|extracellular region
6087_0:003f8c	LOC100208570	100208570	protein_coding	1.49518	921	2	2.5417	0.448657				XP_002160445.1	LOC100208570		100208570	coiled-coil domain-containing protein 47-like			GO:0005509	calcium ion binding	GO:0005783	endoplasmic reticulum
6087_0:001ba2	LOC100205002	100205002	protein_coding	1.49388	922	1	2.67106	0.3167				XP_012556915.1	LOC100205002	G7H7W8	100205002	Minicollagen 16
6087_0:0010eb	LOC100212129	100212129	protein_coding	1.49283	923	1	2.74674	0.238926				XP_012554753.1	LOC100212129		100212129	neo-calmodulin-like isoform X1			GO:0005509	calcium ion binding
6087_0:002ff3	LOC100202324	100202324	protein_coding	1.48929	924	1	2.67461	0.303961				XP_004210011.2	LOC100202324		100202324	nucleoside diphosphate kinase A-like	GO:0006165|GO:0006183|GO:0006241|GO:0006228|GO:0016310	nucleoside diphosphate phosphorylation|GTP biosynthetic process|CTP biosynthetic process|UTP biosynthetic process|phosphorylation	GO:0005524|GO:0000166|GO:0016740|GO:0004550|GO:0016301	ATP binding|nucleotide binding|transferase activity|nucleoside diphosphate kinase activity|kinase activity	GO:0005622	intracellular anatomical structure
6087_0:003dd0	LOC100200547	100200547	protein_coding	1.48855	925	1	2.9771	0	calmodulin-A(LOC100200547)	hmg04070:Phosphatidylinositol signaling system,		XP_002154349.2	LOC100200547		100200547	calmodulin-A			GO:0005509	calcium ion binding
6087_0:000726	LOC100212260	100212260	protein_coding	1.48521	926	2	2.54462	0.425794				XP_002156792.2	LOC100212260		100212260	serine/arginine-rich splicing factor 5-like			GO:0003676	nucleic acid binding
6087_0:001857	LOC100205923	100205923	protein_coding	1.48491	927	1	2.62203	0.347798				XP_012556262.1	LOC100205923		100205923	lupus La protein homolog A-like			GO:0003676	nucleic acid binding	GO:0005634	nucleus
6087_0:000f3f	LOC101240513	101240513	protein_coding	1.48245	928	2	2.34189	0.623001	heat shock factor-binding protein 1-like(LOC101240513)		IPR009643:Heat shock factor binding 1,	XP_004206773.1	HSBP1	T2MI40	101240513	Heat shock factor-binding protein 1	GO:1903507	negative regulation of nucleic acid-templated transcription
6087_0:0049e0	LOC100210886	100210886	protein_coding	1.48238	929	1	2.96476	0	lupus La protein homolog A-like(LOC100210886)		IPR000504:RNA recognition motif domain,IPR002344:Lupus La protein,IPR006630:RNA-binding protein Lupus La,IPR011991:Winged helix-turn-helix DNA-binding domain,IPR012677:Nucleotide-binding, alpha-beta plait,IPR014886:RNA-binding motif,	XP_004212802.2	SSB	T2MGV5	100210886	Lupus La protein			GO:0003676	nucleic acid binding	GO:0005634	nucleus
	LOC100209248	100209248	lncRNA	1.47743	930	1	2.65333	0.301535
6087_0:000e3d	LOC100199935	100199935	protein_coding	1.47512	931	1	2.8518	0.0984413				XP_002168128.3	LOC100199935		100199935	uncharacterized protein C19C2.10-like	GO:0007015|GO:0016477	actin filament organization|cell migration
6087_0:002b68	LOC100212196	100212196	protein_coding	1.47393	932	2	1.79957	1.14829	SH3 domain-binding glutamic acid-rich-like protein 3(LOC100212196)		IPR006993:SH3-binding, glutamic acid-rich protein,IPR012336:Thioredoxin-like fold,	XP_002164708.1	SH3BGRL3	T2M5S5	100212196	SH3 domain-binding glutamic acid-rich-like protein 3
	casp7		protein_coding	1.47285	933	2	2.36651	0.579187
6087_0:002de4	LOC100208163	100208163	protein_coding	1.47172	934	2	2.45058	0.49286	protein couch potato-like(LOC100208163)		IPR000504:RNA recognition motif domain,IPR012677:Nucleotide-binding, alpha-beta plait,	XP_002157969.2	RBPMS	T2M7M1	100208163	RNA-binding protein with multiple splicing			GO:0003676	nucleic acid binding
6087_0:004b73	LOC101239339	101239339	protein_coding	1.46845	935	1	2.93689	0				XP_004213002.1	LOC101239339		101239339	uncharacterized protein LOC101239339
6087_0:003a51	LOC100211845	100211845	protein_coding	1.46844	936	1	2.63757	0.299302	histidine--tRNA ligase, cytoplasmic-like(LOC100211845)	hmg00970:Aminoacyl-tRNA biosynthesis,		XP_004211105.1	LOC100211845		100211845	histidine--tRNA ligase, cytoplasmic-like isoform X1	GO:0006427|GO:0032543	histidyl-tRNA aminoacylation|mitochondrial translation	GO:0005524|GO:0004821	ATP binding|histidine-tRNA ligase activity	GO:0005737|GO:0005739	cytoplasm|mitochondrion
6087_0:0004f4	LOC100213734	100213734	protein_coding	1.46292	937	2	2.47264	0.453202				XP_002158365.3	LOC100213734		100213734	WD repeat-containing protein 1-A-like isoform X1	GO:0030834|GO:0051016|GO:0030042|GO:0040011	regulation of actin filament depolymerization|barbed-end actin filament capping|actin filament depolymerization|locomotion	GO:0003779|GO:0051015	actin binding|actin filament binding	GO:0005884|GO:0030864|GO:0042643	actin filament|cortical actin cytoskeleton|NA
	LOC105844941	105844941	lncRNA	1.45939	938.5	1	2.91878	0
	LOC105847442	105847442	lncRNA	1.45939	938.5	1	2.91878	0
6087_0:003fb3	LOC100211270	100211270	protein_coding	1.45934	940	1	2.7133	0.205375	tumor suppressor candidate 3-like(LOC100211270)	hmg00510:N-Glycan biosynthesis,hmg01100:Metabolic pathways,hmg04141:Protein processing in endoplasmic reticulum,		XP_002167116.2	LOC100211270		100211270	tumor suppressor candidate 3-like	GO:0018279	protein N-linked glycosylation via asparagine			GO:0016021|GO:0016020|GO:0008250	integral component of membrane|membrane|oligosaccharyltransferase complex
6087_0:002b8a	LOC100209716	100209716	protein_coding	1.45896	941	1	2.91791	0	V-type proton ATPase subunit E-like(LOC100209716)	hmg00190:Oxidative phosphorylation,hmg01100:Metabolic pathways,hmg04145:Phagosome,	IPR002842:ATPase, V1/A1 complex, subunit E,	XP_002165791.3	ATP6V1E1	T2MG21	100209716	V-type proton ATPase subunit E 1	GO:0015991	NA	GO:0046961	proton-transporting ATPase activity, rotational mechanism	GO:0033178|GO:0000329	proton-transporting two-sector ATPase complex, catalytic domain|fungal-type vacuole membrane
6087_0:003ee9	LOC100200075	100200075	protein_coding	1.45646	942	2	2.32856	0.584359	asparagine--tRNA ligase, cytoplasmic-like(LOC100200075)	hmg00970:Aminoacyl-tRNA biosynthesis,		XP_002161050.3	LOC100200075		100200075	LOW QUALITY PROTEIN: asparagine--tRNA ligase, cytoplasmic-like	GO:0006418|GO:0006421	tRNA aminoacylation for protein translation|asparaginyl-tRNA aminoacylation	GO:0004816|GO:0000166|GO:0005524|GO:0003676	asparagine-tRNA ligase activity|nucleotide binding|ATP binding|nucleic acid binding	GO:0005737	cytoplasm
6087_0:00309c	LOC100202599	100202599	protein_coding	1.45626	943	1	2.73859	0.173922	pre-mRNA-processing factor 40 homolog B-like(LOC100202599)	hmg03040:Spliceosome,		XP_002157462.3	LOC100202599		100202599	pre-mRNA-processing factor 40 homolog B-like					GO:0071004|GO:0005685	U2-type prespliceosome|U1 snRNP
6087_0:001290	LOC105843815	105843815	protein_coding	1.45589	944	1	2.91177	0				XP_012555091.1	LOC105843815		105843815	uncharacterized protein DDB_G0283697-like
6087_0:0012fc	LOC100209139	100209139	protein_coding	1.4555	945	1	2.67242	0.238574				XP_002154838.2	LOC100209139		100209139	YLP motif-containing protein 1-like isoform X1					GO:0005634	nucleus
6087_0:00210a	LOC105845153	105845153	protein_coding	1.45032	946	2	1.88868	1.01196				XP_012558019.1	LOC105845153		105845153	peptidyl-prolyl cis-trans isomerase NIMA-interacting 4-like	GO:0000413	protein peptidyl-prolyl isomerization	GO:0016853	isomerase activity
6087_0:0045ce	LOC100213381	100213381	protein_coding	1.44597	947	1	2.57657	0.315379				XP_012565212.1	LOC100213381		100213381	cathepsin S-like	GO:0006508	proteolysis
6087_0:001030	LOC100200827	100200827	protein_coding	1.44372	948	1	2.57299	0.314456	eukaryotic peptide chain release factor subunit 1-like(LOC100200827)	hmg03015:mRNA surveillance pathway,	IPR004403:Peptide chain release factor eRF1/aRF1,IPR005140:eRF1 domain 1/Pelota-like,IPR005141:eRF1 domain 2,IPR005142:eRF1 domain 3,IPR024049:Peptide Chain Release Factor eRF1/aRF1, N-terminal,	XP_002156159.1	ETF1	T2MF15	100200827	Eukaryotic peptide chain release factor subunit 1			GO:0016149	translation release factor activity, codon specific	GO:0005737	cytoplasm
	LOC105848062	105848062	lncRNA	1.44356	949	2	1.08736	1.79976
6087_0:0005dc	LOC100203133	100203133	protein_coding	1.44174	950	2	1.55148	1.332				XP_012562855.1	LOC100203133		100203133	exocyst complex component 2-like	GO:0006893|GO:0001927	Golgi to plasma membrane transport|exocyst assembly			GO:0000145	exocyst
6087_0:00117f	LOC100214296	100214296	protein_coding	1.44162	951	1	2.88324	0	RNA polymerase II subunit A C-terminal domain phosphatase SSU72-like(LOC100214296)	hmg03015:mRNA surveillance pathway,	IPR006811:RNA polymerase II subunit A,	XP_002155087.1	SSU72	T2M5H2	100214296	RNA polymerase II subunit A C-terminal domain phosphatase SSU72	GO:0001174|GO:0030847|GO:0006470|GO:0070940|GO:0006367|GO:0098789|GO:0006368|GO:0031564|GO:0009302|GO:0030846|GO:0006397|GO:1905213|GO:0031124|GO:0006378	transcriptional start site selection at RNA polymerase II promoter|termination of RNA polymerase II transcription, exosome-dependent|protein dephosphorylation|dephosphorylation of RNA polymerase II C-terminal domain|transcription initiation from RNA polymerase II promoter|pre-mRNA cleavage required for polyadenylation|transcription elongation from RNA polymerase II promoter|transcription antiterm…	GO:0004721|GO:0008420|GO:0004725	phosphoprotein phosphatase activity|RNA polymerase II CTD heptapeptide repeat phosphatase activity|protein tyrosine phosphatase activity	GO:0005847|GO:0005634	mRNA cleavage and polyadenylation specificity factor complex|nucleus
6087_0:003dfe	LOC100201109	100201109	protein_coding	1.44148	952	2	2.236	0.646958	actin-related protein 2/3 complex subunit 3-like(LOC100201109)	hmg04144:Endocytosis,	IPR007204:ARP2/3 complex, 21kDa subunit (p21-Arc),	XP_002155046.2	ARPC3	T2MJF8	100201109	Actin-related protein 2/3 complex subunit 3	GO:0034314|GO:0030833|GO:0007015|GO:0051654	Arp2/3 complex-mediated actin nucleation|regulation of actin filament polymerization|actin filament organization|establishment of mitochondrion localization	GO:0003779	actin binding	GO:0005856|GO:0005739|GO:0005885|GO:0005737	cytoskeleton|mitochondrion|Arp2/3 protein complex|cytoplasm
	LOC101236145	101236145	lncRNA	1.43646	953	2	1.58711	1.28581
6087_0:000d3c	LOC100208025	100208025	protein_coding	1.42819	954	1	2.65918	0.197197	tight junction protein ZO-2-like(LOC100208025)		IPR000906:ZU5,IPR001452:Src homology-3 domain,IPR001478:PDZ domain,IPR008144:Guanylate kinase,IPR008145:Guanylate kinase/L-type calcium channel,IPR027417:P-loop containing nucleoside triphosphate hydrolase,	XP_012553971.1	ZO-1	Q9BKL2	100208025	Tight junction protein ZO-1					GO:0005923|GO:0005634	bicellular tight junction|nucleus
6087_0:001656	LOC100204677	100204677	protein_coding	1.42713	955	2	2.04144	0.81282	tyrosine aminotransferase-like(LOC100204677)	hmg00130:Ubiquinone and other terpenoid-quinone biosynthesis,hmg00270:Cysteine and methionine metabolism,hmg00350:Tyrosine metabolism,hmg00360:Phenylalanine metabolism,hmg00400:Phenylalanine, tyrosine and tryptophan biosynthesis,hmg01100:Metabolic pathways,hmg01130:Biosynthesis of antibiotics,hmg01230:Biosynthesis of amino acids,		XP_012555860.1	LOC100204677		100204677	tyrosine aminotransferase-like	GO:0009072	aromatic amino acid family metabolic process	GO:0008483|GO:0003824|GO:0030170|GO:0004838	transaminase activity|catalytic activity|pyridoxal phosphate binding|L-tyrosine:2-oxoglutarate aminotransferase activity
6087_0:002984	LOC101240318	101240318	protein_coding	1.42637	956	1	2.85274	0				XP_012559732.1	LOC101240318		101240318	arginine and glutamate-rich protein 1-like
6087_0:001188	LOC100211718	100211718	protein_coding	1.425	957	2	2.44778	0.40222				XP_012554881.1	LOC100211718		100211718	ras GTPase-activating protein-binding protein 1-like			GO:0003676|GO:0003729	nucleic acid binding|mRNA binding	GO:0005622|GO:0005829	intracellular anatomical structure|cytosol
6087_0:000ce1	LOC100209435	100209435	protein_coding	1.42394	958	2	2.16079	0.687087	cytochrome b-c1 complex subunit Rieske, mitochondrial-like(LOC100209435)	hmg00190:Oxidative phosphorylation,hmg01100:Metabolic pathways,	IPR004192:Ubiquinol cytochrome reductase, transmembrane domain,IPR005805:Rieske iron-sulphur protein, C-terminal,IPR006317:Ubiquinol-cytochrome c reductase, iron-sulphur subunit,IPR014349:Rieske iron-sulphur protein,IPR017941:Rieske [2Fe-2S] iron-sulphur domain,	XP_002158337.1	UQCRFS1	T2MF71	100209435	Cytochrome b-c1 complex subunit Rieske, mitochondrial	GO:0022900|GO:0055114|GO:0006122	electron transport chain|NA|mitochondrial electron transport, ubiquinol to cytochrome c	GO:0016491|GO:0008121|GO:0051537|GO:0016679	oxidoreductase activity|ubiquinol-cytochrome-c reductase activity|2 iron, 2 sulfur cluster binding|oxidoreductase activity, acting on diphenols and related substances as donors	GO:0070469|GO:0005739|GO:0016020|GO:0005743	respirasome|mitochondrion|membrane|mitochondrial inner membrane
6087_0:002e8e	LOC100197228	100197228	protein_coding	1.42306	959	1	2.56178	0.284335	eukaryotic translation initiation factor 3 subunit C(LOC100197228)	hmg03013:RNA transport,		XP_012560743.1	LOC100197228		100197228	eukaryotic translation initiation factor 3 subunit C	GO:0001731|GO:0001732|GO:0002183|GO:0006446	formation of translation preinitiation complex|formation of cytoplasmic translation initiation complex|cytoplasmic translational initiation|regulation of translational initiation	GO:0031369	translation initiation factor binding	GO:0005852|GO:0016282|GO:0005737	eukaryotic translation initiation factor 3 complex|eukaryotic 43S preinitiation complex|cytoplasm
6087_0:001b36	LOC101239128	101239128	protein_coding	1.41851	960	2	0.677188	2.15983				XP_012556826.1	LOC101239128		101239128	ribonuclease kappa-B-like	GO:0009303|GO:0090305|GO:0090502	rRNA transcription|nucleic acid phosphodiester bond hydrolysis|RNA phosphodiester bond hydrolysis, endonucleolytic	GO:0004521	endoribonuclease activity	GO:0016021|GO:0016020	integral component of membrane|membrane
6087_0:001c1a	LOC101235798	101235798	protein_coding	1.41837	961	1	2.83673	0				XP_012557013.1	LOC101235798		101235798	pre-rRNA-processing protein TSR1 homolog	GO:0000479|GO:0000461	endonucleolytic cleavage of tricistronic rRNA transcript (SSU-rRNA, 5.8S rRNA, LSU-rRNA)|endonucleolytic cleavage to generate mature 3'-end of SSU-rRNA from (SSU-rRNA, 5.8S rRNA, LSU-rRNA)	GO:0034511|GO:0005525|GO:0003924|GO:0043021	U3 snoRNA binding|GTP binding|GTPase activity|ribonucleoprotein complex binding	GO:0005634|GO:0030688|GO:0005737|GO:0005730	nucleus|preribosome, small subunit precursor|cytoplasm|nucleolus
6087_0:003a36	LOC100204271	100204271	protein_coding	1.41719	962	1	2.83438	0	translocon-associated protein subunit alpha-like(LOC100204271)	hmg04141:Protein processing in endoplasmic reticulum,	IPR005595:Translocon-associated protein (TRAP), alpha subunit,	XP_002161252.1	SSR1	T2MG75	100204271	Translocon-associated protein subunit alpha	GO:0006613	cotranslational protein targeting to membrane			GO:0016020|GO:0016021|GO:0005789|GO:0005783	membrane|integral component of membrane|endoplasmic reticulum membrane|endoplasmic reticulum
6087_0:0033ac	LOC100215398	100215398	protein_coding	1.41018	963	1	2.46381	0.35655	rho GDP-dissociation inhibitor 1-like(LOC100215398)		IPR000406:RHO protein GDP dissociation inhibitor,IPR014756:Immunoglobulin E-set,IPR024792:Rho GDP-dissociation inhibitor domain,	XP_012561744.1	ARHGDIA	T2MER7	100215398	Rho GDP-dissociation inhibitor 1			GO:0005094	Rho GDP-dissociation inhibitor activity	GO:0005737	cytoplasm
	LOC105847852	105847852	lncRNA	1.41005	964	1	2.8201	0
6087_0:001fcc	LOC100211071	100211071	protein_coding	1.40914	965	1	2.60068	0.217597				XP_002166518.2	LOC100211071		100211071	blastula protease 10-like	GO:0006508	proteolysis	GO:0008270|GO:0008237|GO:0004222	zinc ion binding|metallopeptidase activity|metalloendopeptidase activity
6087_0:001f17	LOC101236415	101236415	protein_coding	1.40871	966	1	2.81743	0				XP_004208333.2	LOC101236415		101236415	serine/threonine-protein kinase fray2-like	GO:0006376	mRNA splice site selection	GO:0003729	mRNA binding	GO:0005685	U1 snRNP
6087_0:0016a7	LOC100212741	100212741	protein_coding	1.4086	967	1	2.51041	0.306796				XP_002169931.3	LOC100212741		100212741	protein DD3-3-like					GO:0016021	integral component of membrane
6087_0:0025b2	LOC100205740	100205740	protein_coding	1.40577	968	1	2.45611	0.355432	NADH dehydrogenase [ubiquinone] 1 beta subcomplex subunit 8, mitochondrial-like(LOC100205740)	hmg00190:Oxidative phosphorylation,hmg01100:Metabolic pathways,		XP_002163865.1	LOC100205740		100205740	NADH dehydrogenase	GO:0055114	NA	GO:0003954|GO:0008137	NADH dehydrogenase activity|NADH dehydrogenase (ubiquinone) activity	GO:0016020|GO:0016021|GO:0005739	membrane|integral component of membrane|mitochondrion
6087_0:001d1c	LOC100205341	100205341	protein_coding	1.40293	969	1	2.67709	0.128772	serine/arginine repetitive matrix protein 2-like(LOC100205341)		IPR013170:mRNA splicing factor, Cwf21,	XP_002157530.2	SRRM2	T2M3M5	100205341	Serine/arginine repetitive matrix protein 2					GO:0005684|GO:0000790|GO:0016607	U2-type spliceosomal complex|NA|nuclear speck
6087_0:002ce0	LOC100202072	100202072	protein_coding	1.39992	970	1	2.61889	0.180948				XP_012560383.1	LOC100202072		100202072	rhamnose-binding lectin-like
6087_0:00237e	LOC100213921	100213921	protein_coding	1.39688	971	1	2.54932	0.244437				XP_002155841.3	LOC100213921		100213921	far upstream element-binding protein 3-like isoform X1			GO:0003676	nucleic acid binding
	LOC105844483	105844483	lncRNA	1.39597	972	1	2.79195	0
6087_0:00403b	LOC101239752	101239752	protein_coding	1.39107	973	1	2.78214	0				XP_004211735.1	LOC101239752		101239752	uncharacterized protein LOC101239752
	LOC105844900	105844900	lncRNA	1.3907	974	1	2.7814	0
	bcl-2		protein_coding	1.3893	975	2	2.26314	0.515455
6087_0:001c58	LOC100209666	100209666	protein_coding	1.38864	976	2	1.22138	1.5559	small ubiquitin-related modifier 1-like(LOC100209666)	hmg03013:RNA transport,	IPR000626:Ubiquitin,IPR022617:Small ubiquitin-related modifier, SUMO,	XP_002156156.1	SUMO1	T2MF11	100209666	Small ubiquitin-related modifier			GO:0031386	protein tag	GO:0005634	nucleus
6087_0:000ebe	LOC100206806	100206806	protein_coding	1.38642	977	1	2.37542	0.397427	eukaryotic translation initiation factor 4E type 3-like(LOC100206806)		IPR001040:Translation Initiation factor eIF- 4e,IPR023398:Translation Initiation factor eIF- 4e-like domain,	XP_002163582.2	EIF4E3	T2MA28	100206806	Eukaryotic translation initiation factor 4E type 3					GO:0005737	cytoplasm
	LOC101235948	101235948	lncRNA	1.38413	978	1	2.76827	0
6087_0:002290	LOC100210799	100210799	protein_coding	1.38331	979	1	2.5722	0.194428				XP_002167600.1	LOC100210799		100210799	trichohyalin-like	GO:0050684	regulation of mRNA processing	GO:0043565|GO:0003676|GO:0003690	sequence-specific DNA binding|nucleic acid binding|double-stranded DNA binding	GO:0005634	nucleus
6087_0:0038aa	LOC100215054	100215054	protein_coding	1.3831	980	1	2.54171	0.224493	ran-specific GTPase-activating protein-like(LOC100215054)		IPR000156:Ran binding domain,IPR011993:Pleckstrin homology-like domain,	XP_002160712.1	RANBP1	T2MG70	100215054	Ran-specific GTPase-activating protein	GO:0046604|GO:0000082|GO:0006606|GO:0006405	positive regulation of mitotic centrosome separation|G1/S transition of mitotic cell cycle|protein import into nucleus|RNA export from nucleus	GO:0008536	NA	GO:0005622|GO:0005634|GO:0005737|GO:0005813	intracellular anatomical structure|nucleus|cytoplasm|centrosome
6087_0:002cfa	LOC101236905	101236905	protein_coding	1.37961	981	1	2.57735	0.181876				XP_012560405.1	LOC101236905		101236905	myoferlin-like					GO:0016021|GO:0016020	integral component of membrane|membrane
	LOC100205385	100205385	lncRNA	1.37929	982	1	0	2.75858
6087_0:003bb9	LOC100209200	100209200	protein_coding	1.37847	983	1	2.75693	0	casein kinase II subunit beta(LOC100209200)	hmg03008:Ribosome biogenesis in eukaryotes,hmg04310:Wnt signaling pathway,		XP_012563347.1	LOC100209200		100209200	casein kinase II subunit beta isoform X1	GO:0045859	regulation of protein kinase activity	GO:0019887	protein kinase regulator activity	GO:0005956	protein kinase CK2 complex
6087_0:0035f2	LOC100211408	100211408	protein_coding	1.3773	984	2	1.53212	1.22248	ubiquitin-fold modifier 1(LOC100211408)		IPR005375:Ubiquitin-fold modifier 1,	XP_002163012.1	UFM1	T2MEC9	100211408	Ubiquitin-fold modifier 1	GO:1990592|GO:0071569|GO:0034976|GO:0033146	protein K69-linked ufmylation|protein ufmylation|response to endoplasmic reticulum stress|regulation of intracellular estrogen receptor signaling pathway			GO:0005634|GO:0005737|GO:0005783	nucleus|cytoplasm|endoplasmic reticulum
6087_0:002b4d	LOC100212435	100212435	protein_coding	1.37451	985	2	1.20898	1.54005				XP_002156847.1	LOC100212435		100212435	chromatin target of PRMT1 protein-like	GO:0006406|GO:0031062|GO:0051096|GO:0008284|GO:0032781	mRNA export from nucleus|positive regulation of histone methylation|positive regulation of helicase activity|positive regulation of cell population proliferation|positive regulation of ATPase activity	GO:0008327	methyl-CpG binding	GO:0000346|GO:0016607|GO:0036464	transcription export complex|nuclear speck|cytoplasmic ribonucleoprotein granule
6087_0:002aa2	LOC100202412	100202412	protein_coding	1.37075	986	1	2.50702	0.234477	polyadenylate-binding protein 2-B-like(LOC100202412)	hmg03015:mRNA surveillance pathway,		XP_002163300.2	LOC100202412		100202412	polyadenylate-binding protein 2-B-like	GO:1904247	positive regulation of polynucleotide adenylyltransferase activity	GO:0003676	nucleic acid binding
6087_0:001748	LOC100197460	100197460	protein_coding	1.36999	987	1	2.48522	0.254769				XP_004207566.1	LOC100197460		100197460	uncharacterized protein LOC100197460	GO:0009607	response to biotic stimulus			GO:0016021|GO:0016020	integral component of membrane|membrane
6087_0:0039e6	LOC100212328	100212328	protein_coding	1.36995	988	1	2.7399	0				XP_012562982.1	LOC100212328		100212328	myosin-2 heavy chain-like
6087_0:0001d0	LOC100211681	100211681	protein_coding	1.3673	989	2	2.18607	0.548537				XP_002164527.2	LOC100211681		100211681	RNA-editing ligase 2, mitochondrial-like			GO:0016874|GO:0003972|GO:0005524	ligase activity|RNA ligase (ATP) activity|ATP binding
6087_0:0003cf	LOC100209354	100209354	protein_coding	1.36304	990	2	1.91972	0.806348	septin-7-like(LOC100209354)		IPR016491:Septin,IPR027417:P-loop containing nucleoside triphosphate hydrolase,	XP_002162373.2	SEPT7	T2MDA8	100209354	Septin-7			GO:0005525|GO:0000166	GTP binding|nucleotide binding
6087_0:000021	LOC100201764	100201764	protein_coding	1.36257	991	2	1.59931	1.12582	arginase-1-like(LOC100201764)	hmg00220:Arginine biosynthesis,hmg00330:Arginine and proline metabolism,hmg01100:Metabolic pathways,hmg01130:Biosynthesis of antibiotics,hmg01230:Biosynthesis of amino acids,		XP_002163087.2	LOC100201764		100201764	arginase-1-like	GO:0006525	arginine metabolic process	GO:0046872|GO:0016813|GO:0016787|GO:0004053	metal ion binding|hydrolase activity, acting on carbon-nitrogen (but not peptide) bonds, in linear amidines|hydrolase activity|arginase activity
6087_0:001e5d	LOC100215156	100215156	protein_coding	1.36149	992	1	2.65501	0.0679772				XP_002163022.3	LOC100215156		100215156	large proline-rich protein bag6-A-like	GO:0030433|GO:0042771|GO:0007130|GO:0042981|GO:0007283|GO:0007420|GO:1904294|GO:0018393|GO:0050821|GO:0010498|GO:0001822|GO:0071712|GO:0002429|GO:0032435|GO:0070059|GO:1904378|GO:0045861|GO:0071816|GO:0030101|GO:0030324|GO:0061857	ubiquitin-dependent ERAD pathway|intrinsic apoptotic signaling pathway in response to DNA damage by p53 class mediator|synaptonemal complex assembly|regulation of apoptotic process|spermatogenesis|brain development|positive regulation of ERAD pathway|internal peptidyl-lysine acetylation|protein stabilization|proteasomal protein catabolic process|kidney development|ER-associated misfolded protein …	GO:0051787|GO:0031625|GO:0031593|GO:1990381|GO:0005102|GO:0070628|GO:0030544	misfolded protein binding|ubiquitin protein ligase binding|polyubiquitin modification-dependent protein binding|ubiquitin-specific protease binding|signaling receptor binding|proteasome binding|Hsp70 protein binding	GO:0005829|GO:0005654|GO:0070062|GO:0071818|GO:0016020|GO:0005634|GO:0005737|GO:0043231	cytosol|nucleoplasm|extracellular exosome|BAT3 complex|membrane|nucleus|cytoplasm|intracellular membrane-bounded organelle
6087_0:000bf0	LOC100200950	100200950	protein_coding	1.3603	993	2	1.70373	1.01687				XP_002161847.1	LOC100200950		100200950	myophilin-like
6087_0:002bbd	LOC100215612	100215612	protein_coding	1.35931	994	1	2.47312	0.245496	translocation protein SEC63 homolog(LOC100215612)	hmg03060:Protein export,hmg04141:Protein processing in endoplasmic reticulum,	IPR000008:C2 calcium-dependent membrane targeting,IPR001623:DnaJ domain,IPR004179:Sec63 domain,IPR014756:Immunoglobulin E-set,	XP_002168469.3	SEC63	T2M3Q3	100215612	Translocation protein SEC63 homolog	GO:0031204	posttranslational protein targeting to membrane, translocation			GO:0030176|GO:0016021|GO:0016020|GO:0005622	integral component of endoplasmic reticulum membrane|integral component of membrane|membrane|intracellular anatomical structure
6087_0:002d3b	LOC100214183	100214183	protein_coding	1.35837	995	1	2.71673	0				XP_012560464.1	LOC100214183		100214183	uncharacterized protein LOC100214183			GO:0046872	metal ion binding
6087_0:000b0d	LOC100200457	100200457	protein_coding	1.35818	996	1	2.39833	0.318033				XP_002164373.1	LOC100200457		100200457	uncharacterized protein LOC100200457
6087_0:00414f	LOC100199756	100199756	protein_coding	1.35708	997	1	2.71416	0				XP_012564378.1	LOC100199756		100199756	RNA polymerase II elongation factor ELL-like	GO:0006368|GO:0042795	transcription elongation from RNA polymerase II promoter|snRNA transcription by RNA polymerase II			GO:0008023	transcription elongation factor complex
	LOC105845540	105845540	lncRNA	1.35549	998	1	2.71099	0
	LOC101234627	101234627	lncRNA	1.35387	999	2	1.04084	1.66691
6087_0:0035fb	LOC100205369	100205369	protein_coding	1.35233	1000	2	1.99912	0.705543				XP_004210660.2	LOC100205369		100205369	YTH domain-containing family protein 2-like			GO:1990247	N6-methyladenosine-containing RNA binding
	LOC105848889	105848889	lncRNA	1.3502	1001	1	2.70039	0
6087_0:000dc6	LOC100215810	100215810	protein_coding	1.34545	1002	1	2.45613	0.23477				XP_004206639.2	LOC100215810		100215810	mucin-5AC-like					GO:0005576	extracellular region
	LOC105847575	105847575	lncRNA	1.34329	1003	1	2.68658	0
	LOC105849099	105849099	lncRNA	1.34329	1004	1	2.68657	0
6087_0:00469b	LOC101234646	101234646	protein_coding	1.34256	1005	1	2.68512	0				XP_004212396.1	LOC101234646		101234646	C-Myc-binding protein homolog
6087_0:004425	LOC101238816	101238816	protein_coding	1.34045	1006	2	1.29823	1.38267				XP_012564890.1	LOC101238816		101238816	uncharacterized protein LOC101238816	GO:0051601	exocyst localization	GO:0000149	SNARE binding	GO:0000145	exocyst
6087_0:00141b	LOC100199441	100199441	protein_coding	1.33975	1007	1	2.51939	0.160116	S-adenosylmethionine synthase isoform type-1-like(LOC100199441)	hmg00270:Cysteine and methionine metabolism,hmg01100:Metabolic pathways,hmg01230:Biosynthesis of amino acids,	IPR002133:S-adenosylmethionine synthetase,IPR022628:S-adenosylmethionine synthetase, N-terminal,IPR022629:S-adenosylmethionine synthetase, central domain,IPR022630:S-adenosylmethionine synthetase, C-terminal,IPR022631:S-adenosylmethionine synthetase, conserved site,IPR022636:S-adenosylmethionine synthetase superfamily,	XP_002160067.1	MAT2A	T2MGQ7	100199441	S-adenosylmethionine synthase	GO:0006556	S-adenosylmethionine biosynthetic process	GO:0046872|GO:0004478|GO:0005524|GO:0016740|GO:0000166	metal ion binding|methionine adenosyltransferase activity|ATP binding|transferase activity|nucleotide binding	GO:0005829	cytosol
6087_0:0005f1	LOC100207209	100207209	protein_coding	1.33948	1008	1	2.56578	0.113175	mediator of RNA polymerase II transcription subunit 12-like(LOC100207209)		IPR000504:RNA recognition motif domain,IPR012677:Nucleotide-binding, alpha-beta plait,	XP_012563012.1	RAVER1	T2MA22	100207209	Ribonucleoprotein PTB-binding 1			GO:0003676	nucleic acid binding	GO:0005634	nucleus
6087_0:002f13	LOC100210824	100210824	protein_coding	1.33589	1009	1	2.30485	0.366939				XP_002163429.1	LOC100210824		100210824	S-crystallin 4-like			GO:0004364	glutathione transferase activity
6087_0:003855	LOC100206535	100206535	protein_coding	1.33417	1010	1	2.4309	0.237446				XP_002158536.2	LOC100206535		100206535	serine/threonine-protein kinase dst1-like	GO:0006468|GO:2000271	protein phosphorylation|positive regulation of fibroblast apoptotic process	GO:0005524	ATP binding	GO:0005634	nucleus
6087_0:0035b6	LOC100201403	100201403	protein_coding	1.33339	1011	1	2.46597	0.200807	stress-70 protein, mitochondrial-like(LOC100201403)	hmg03018:RNA degradation,		XP_002159977.2	LOC100201403		100201403	stress-70 protein, mitochondrial-like			GO:0005524|GO:0051082|GO:0000166	ATP binding|unfolded protein binding|nucleotide binding
6087_0:000620	LOC100209512	100209512	protein_coding	1.33309	1012	2	1.67399	0.992192				XP_012563408.1	LOC100209512		100209512	mucin-5AC-like
	LOC100205405	100205405		1.33138	1013	2	1.92526	0.7375
6087_0:0018f9	LOC100205491	100205491	protein_coding	1.33086	1014	1	2.4826	0.179117	protein transport protein Sec24D-like(LOC100205491)	hmg04141:Protein processing in endoplasmic reticulum,	IPR002035:von Willebrand factor, type A,IPR006895:Zinc finger, Sec23/Sec24-type,IPR006896:Sec23/Sec24, trunk domain,IPR006900:Sec23/Sec24, helical domain,IPR007123:Gelsolin domain,IPR012990:Sec23/Sec24 beta-sandwich,	XP_012556392.1	SEC24C	T2MFJ8	100205491	Protein transport protein Sec24C	GO:0090110|GO:0001701	COPII-coated vesicle cargo loading|in utero embryonic development	GO:0008270|GO:0000149	zinc ion binding|SNARE binding	GO:0030127	COPII vesicle coat
6087_0:002a9d	LOC100200856	100200856	protein_coding	1.32539	1015	1	2.65078	0	signal peptidase complex subunit 3-like(LOC100200856)	hmg03060:Protein export,	IPR007653:Signal peptidase 22kDa subunit,	XP_002165721.1	SPCS3	T2MEX0	100200856	Signal peptidase complex subunit 3	GO:0006465|GO:0045047	signal peptide processing|protein targeting to ER	GO:0008233	peptidase activity	GO:0005787|GO:0005783|GO:0016021|GO:0005789|GO:0016020	signal peptidase complex|endoplasmic reticulum|integral component of membrane|endoplasmic reticulum membrane|membrane
	LOC105845336	105845336	lncRNA	1.32353	1016	1	2.64705	0
6087_0:0009c0	LOC100215790	100215790	protein_coding	1.3188	1017	1	2.39917	0.238423				XP_012567023.1	LOC100215790		100215790	peptidyl-prolyl cis-trans isomerase D-like	GO:0000413|GO:0042981	protein peptidyl-prolyl isomerization|regulation of apoptotic process	GO:0016853	isomerase activity
6087_0:0023cb	LOC105845407	105845407	protein_coding	1.31875	1018	1	2.25972	0.377774				XP_012558601.1	LOC105845407		105845407	uncharacterized protein LOC105845407					GO:0016021	integral component of membrane
6087_0:0047b8	LOC101235886	101235886	protein_coding	1.31383	1019	2	1.46175	1.1659				XP_004212537.2	LOC101235886		101235886	protein YIPF4-like					GO:0005794|GO:0016021|GO:0043231|GO:0016020|GO:0005783	Golgi apparatus|integral component of membrane|intracellular membrane-bounded organelle|membrane|endoplasmic reticulum
6087_0:002c16	LOC100206887	100206887	protein_coding	1.31362	1020	1	2.35921	0.268022				XP_012560236.1	LOC100206887		100206887	calcium uniporter protein, mitochondrial-like	GO:0006851|GO:0036444|GO:0051560	mitochondrial calcium ion transmembrane transport|calcium import into the mitochondrion|mitochondrial calcium ion homeostasis	GO:0015292|GO:0005262	uniporter activity|calcium channel activity	GO:0016021|GO:0016020|GO:0005739|GO:0031305|GO:0034704|GO:1990246	integral component of membrane|membrane|mitochondrion|integral component of mitochondrial inner membrane|calcium channel complex|uniplex complex
6087_0:000c08	LOC100198469	100198469	protein_coding	1.31259	1021	2	1.19583	1.42936	dynein light chain 2, cytoplasmic(LOC100198469)		IPR001372:Dynein light chain, type 1/2,IPR019763:Dynein light chain, type 1/2, conserved site,	XP_002159448.1	DYNLL2	T2M856	100198469	Dynein light chain	GO:0010970|GO:2000582|GO:0007017	transport along microtubule|positive regulation of ATP-dependent microtubule motor activity, plus-end-directed|microtubule-based process	GO:0051959|GO:0045505|GO:0008092	dynein light intermediate chain binding|dynein intermediate chain binding|cytoskeletal protein binding	GO:0030286|GO:0005875|GO:0005868	dynein complex|microtubule associated complex|cytoplasmic dynein complex
6087_0:002f78	LOC100200828	100200828	protein_coding	1.31135	1022	1	2.44571	0.176978				XP_002162083.3	LOC100200828		100200828	pumilio homolog 2-like isoform X1	GO:0043488|GO:1900246|GO:0010608|GO:2000637|GO:0051983	regulation of mRNA stability|positive regulation of RIG-I signaling pathway|posttranscriptional regulation of gene expression|positive regulation of gene silencing by miRNA|regulation of chromosome segregation	GO:0035198|GO:0003730|GO:0005488	miRNA binding|mRNA 3'-UTR binding|binding	GO:0010494|GO:0005829	cytoplasmic stress granule|cytosol
6087_0:003683	LOC101240495	101240495	protein_coding	1.3106	1023	1	2.6212	0				XP_004210717.1	LOC101240495		101240495	uncharacterized protein C10orf35 homolog					GO:0016021|GO:0016020	integral component of membrane|membrane
6087_0:00274b	LOC100196995	100196995	protein_coding	1.31059	1024	2	2.06182	0.559365	cysteine string protein-like(LOC100196995)	hmg04141:Protein processing in endoplasmic reticulum,	IPR001623:DnaJ domain,IPR018253:DnaJ domain, conserved site,	XP_012559287.1	DNAJC5	T2M614	100196995	DnaJ homolog subfamily C member 5	GO:0043524	negative regulation of neuron apoptotic process			GO:0008021	synaptic vesicle
6087_0:000a25	LOC100213683	100213683	protein_coding	1.3095	1025	2	1.64018	0.978818	eukaryotic translation initiation factor 3 subunit J-like(LOC100213683)	hmg03013:RNA transport,		XP_012567103.1	LOC100213683		100213683	eukaryotic translation initiation factor 3 subunit J-like					GO:0005737|GO:0005852|GO:0016282	cytoplasm|eukaryotic translation initiation factor 3 complex|eukaryotic 43S preinitiation complex
6087_0:00075f	LOC101236665	101236665	protein_coding	1.30916	1026	1	2.61832	0				XP_004206066.1	LOC101236665		101236665	talin-1-like			GO:0003779	actin binding
6087_0:000a87	LOC100203097	100203097	protein_coding	1.30613	1027	1	2.61226	0	endoplasmic reticulum resident protein 44-like(LOC100203097)		IPR012336:Thioredoxin-like fold,IPR013766:Thioredoxin domain,	XP_002155688.1	ERP44	T2M715	100203097	Endoplasmic reticulum resident protein 44	GO:0034976	response to endoplasmic reticulum stress			GO:0005623|GO:0005783	NA|endoplasmic reticulum
6087_0:003afb	LOC100212882	100212882	protein_coding	1.3051	1028	2	2.15912	0.451072	protein Smaug homolog 1-like(LOC100212882)		IPR001660:Sterile alpha motif domain,IPR013761:Sterile alpha motif/pointed domain,IPR015327:Smaug, pseudo-HEAT analogous topology,	XP_002170483.2	SAMD4B	T2MC61	100212882	Protein Smaug homolog 2	GO:0000289|GO:0043488	nuclear-transcribed mRNA poly(A) tail shortening|regulation of mRNA stability	GO:0030371|GO:0003729	translation repressor activity|mRNA binding	GO:0000932|GO:0005829	P-body|cytosol
6087_0:001138	LOC100200203	100200203	protein_coding	1.3048	1029	2	2.19847	0.411121				XP_002165732.1	LOC100200203		100200203	balbiani ring protein 3-like	GO:0010469	regulation of signaling receptor activity	GO:0008083	growth factor activity	GO:0016020	membrane
6087_0:002845	LOC100201126	100201126	protein_coding	1.30368	1030	2	2.1238	0.483568				XP_002156408.3	LOC100201126		100201126	minor histocompatibility antigen H13-like	GO:0006508	proteolysis	GO:0004190|GO:0042500	aspartic-type endopeptidase activity|aspartic endopeptidase activity, intramembrane cleaving	GO:0016021|GO:0016020|GO:0005783|GO:0071556|GO:0071458|GO:0005765|GO:0030660	integral component of membrane|membrane|endoplasmic reticulum|integral component of lumenal side of endoplasmic reticulum membrane|integral component of cytoplasmic side of endoplasmic reticulum membrane|lysosomal membrane|Golgi-associated vesicle membrane
6087_0:00215f	LOC100209560	100209560	protein_coding	1.30283	1031	1	2.60566	0	protein LSM14 homolog(LOC100209560)		IPR010920:Like-Sm (LSM) domain,IPR019050:FDF domain,IPR025609:Lsm14 N-terminal,IPR025761:FFD box,IPR025762:DFDF domain,	XP_002160512.2	LSM14B	T2M6R5	100209560	Protein LSM14 homolog B	GO:0033962	P-body assembly			GO:0000932|GO:0010494|GO:0036464|GO:0005829|GO:0005737	P-body|cytoplasmic stress granule|cytoplasmic ribonucleoprotein granule|cytosol|cytoplasm
6087_0:0049e9	LOC105850033	105850033	protein_coding	1.30255	1032	1	2.6051	0				XP_012565967.1	LOC105850033		105850033	ATP-dependent DNA helicase PIF1-like	GO:0006281|GO:0000723|GO:0032508|GO:0006310	DNA repair|telomere maintenance|DNA duplex unwinding|DNA recombination	GO:0005524|GO:0016787|GO:0004386|GO:0000166	ATP binding|hydrolase activity|helicase activity|nucleotide binding
6087_0:000294	LOC100207015	100207015	protein_coding	1.30082	1033	1	2.39052	0.211112	GTP-binding protein SAR1b-like(LOC100207015)	hmg04141:Protein processing in endoplasmic reticulum,	IPR005225:Small GTP-binding protein domain,IPR006687:Small GTPase superfamily, SAR1-type,IPR006689:Small GTPase superfamily, ARF/SAR type,IPR027417:P-loop containing nucleoside triphosphate hydrolase,	XP_002156778.1	SAR1B	T2M2Z2	100207015	GTP-binding protein SAR1b			GO:0000166|GO:0005525	nucleotide binding|GTP binding	GO:0005622|GO:0005783|GO:0005794	intracellular anatomical structure|endoplasmic reticulum|Golgi apparatus
6087_0:003220	LOC100211283	100211283	protein_coding	1.29994	1034	1	2.49003	0.109842				XP_002162187.3	LOC100211283		100211283	DNA topoisomerase I, mitochondrial-like	GO:0006265	DNA topological change	GO:0003917	DNA topoisomerase type I (single strand cut, ATP-independent) activity	GO:0005694|GO:0005634|GO:0031298|GO:0005730|GO:0005829	chromosome|nucleus|replication fork protection complex|nucleolus|cytosol
6087_0:003a07	LOC100210741	100210741	protein_coding	1.29279	1035	2	1.61927	0.966301				XP_002157818.2	LOC100210741		100210741	BPTI/Kunitz domain-containing protein 4-like			GO:0030414|GO:0004867	peptidase inhibitor activity|serine-type endopeptidase inhibitor activity	GO:0005576	extracellular region
6087_0:00458c	LOC105849343	105849343	protein_coding	1.2921	1036	2	1.68781	0.896386				XP_012565167.1	LOC105849343		105849343	deoxyribonuclease-1-like	GO:0006308	DNA catabolic process	GO:0004519	endonuclease activity	GO:0005634	nucleus
6087_0:000805	LOC100213202	100213202	protein_coding	1.29187	1037	1	2.31174	0.272008				XP_002160092.2	LOC100213202		100213202	serine/threonine-protein kinase RIO3-like	GO:0006468|GO:0016310	protein phosphorylation|phosphorylation	GO:0016301|GO:0000166|GO:0005524	kinase activity|nucleotide binding|ATP binding
6087_0:001e07	LOC100201314	100201314	protein_coding	1.29113	1038	1	2.28602	0.29625	poly(A) RNA polymerase cid14-like(LOC100201314)	hmg03018:RNA degradation,	IPR002058:PAP/25A-associated,IPR002934:Nucleotidyl transferase domain,	XP_002159462.2	PAPD5	T2M9S9	100201314	PAP-associated domain-containing protein 5			GO:0016779	nucleotidyltransferase activity
6087_0:004869	LOC101241841	101241841	protein_coding	1.28984	1039	1	2.20452	0.375151	uncharacterized LOC101241841(LOC101241841)	hmg04320:Dorso-ventral axis formation,		XP_004212611.2	LOC101241841		101241841	uncharacterized protein LOC101241841	GO:2000766	negative regulation of cytoplasmic translation	GO:0003730|GO:0045182|GO:0003676|GO:0000900|GO:0008135	mRNA 3'-UTR binding|translation regulator activity|nucleic acid binding|translation repressor activity, mRNA regulatory element binding|translation factor activity, RNA binding	GO:0005634|GO:0005737|GO:0045202|GO:1990124	nucleus|cytoplasm|synapse|messenger ribonucleoprotein complex
6087_0:003963	LOC100207040	100207040	protein_coding	1.28488	1040	1	2.45508	0.114676				XP_002163453.3	LOC100207040		100207040	uncharacterized protein LOC100207040	GO:0006629|GO:0006665	lipid metabolic process|sphingolipid metabolic process			GO:0005764	lysosome
6087_0:0046d0	LOC105849552	105849552	protein_coding	1.283	1041	2	1.42061	1.14539				XP_012565399.1	LOC105849552		105849552	protein kinase C iota type-like
6087_0:002e5a	LOC100210247	100210247	protein_coding	1.28194	1042	1	2.45556	0.108319				XP_012560707.1	LOC100210247		100210247	cartilage matrix protein-like					GO:0005576|GO:0005578	extracellular region|NA
6087_0:001485	LOC100202865	100202865	protein_coding	1.28162	1043	1	2.56324	0				XP_002164901.1	LOC100202865		100202865	prohibitin-like	GO:0045861|GO:0001302|GO:0000001	negative regulation of proteolysis|NA|mitochondrion inheritance			GO:0005743|GO:0005739|GO:1990429|GO:0016020	mitochondrial inner membrane|mitochondrion|peroxisomal importomer complex|membrane
6087_0:001537	LOC100210123	100210123	protein_coding	1.28128	1044	1	2.56256	0	calnexin-like(LOC100210123)	hmg04141:Protein processing in endoplasmic reticulum,hmg04145:Phagosome,	IPR001580:Calreticulin/calnexin,IPR009033:Calreticulin/calnexin, P domain,IPR013320:Concanavalin A-like lectin/glucanase, subgroup,IPR018124:Calreticulin/calnexin, conserved site,	XP_012555630.1	CANX	T2MGV9	100210123	Calnexin			GO:0051082|GO:0005509	unfolded protein binding|calcium ion binding	GO:0016021|GO:0005783|GO:0016020	integral component of membrane|endoplasmic reticulum|membrane
6087_0:004703	LOC100209765	100209765	protein_coding	1.27969	1045	2	2.02198	0.537398				XP_002154965.2	LOC100209765		100209765	glucose-6-phosphate 1-dehydrogenase-like	GO:0006098|GO:0006006|GO:0055114	pentose-phosphate shunt|glucose metabolic process|NA	GO:0004345|GO:0050661|GO:0016491	glucose-6-phosphate dehydrogenase activity|NADP binding|oxidoreductase activity
6087_0:003c0f	LOC100199346	100199346	protein_coding	1.27824	1046	2	1.88856	0.667927				XP_002165222.1	LOC100199346		100199346	peroxiredoxin-2-like	GO:0055114|GO:0098869	NA|cellular oxidant detoxification	GO:0016209|GO:0016491|GO:0051920	antioxidant activity|oxidoreductase activity|peroxiredoxin activity	GO:0005623	NA
6087_0:00333f	LOC101241292	101241292	protein_coding	1.27699	1047	2	1.66811	0.885878	CDC42 small effector protein 2-A-like(LOC101241292)		IPR000095:PAK-box/P21-Rho-binding,	XP_012561649.1	CDC42SE2	T2M4C1	101241292	CDC42 small effector protein 2			GO:0005198	structural molecule activity
	LOC105845016	105845016	lncRNA	1.27639	1048	1	2.55277	0
6087_0:003d02	LOC100205598	100205598	protein_coding	1.27466	1049	2	1.41822	1.13111				XP_002169783.2	LOC100205598		100205598	succinyl-CoA:3-ketoacid coenzyme A transferase 1, mitochondrial-like	GO:0046952	ketone body catabolic process	GO:0008260|GO:0008410|GO:0016740	3-oxoacid CoA-transferase activity|CoA-transferase activity|transferase activity	GO:0005739	mitochondrion
6087_0:002937	LOC105845945	105845945	protein_coding	1.26767	1050	1	2.53534	0				XP_012559675.1	LOC105845945		105845945	tropomyosin-1-like
6087_0:000025	LOC100215319	100215319	protein_coding	1.26739	1051	2	1.22771	1.30707				XP_002160755.1	LOC100215319		100215319	copper transport protein ATOX1 homolog	GO:0030001|GO:0006878|GO:0006979|GO:0015680	metal ion transport|cellular copper ion homeostasis|response to oxidative stress|protein maturation by copper ion transfer	GO:0046872|GO:0016531	metal ion binding|copper chaperone activity	GO:0005737	cytoplasm
6087_0:002b1f	LOC100209548	100209548	protein_coding	1.26706	1052	2	1.50648	1.02763				XP_012560036.1	LOC100209548		100209548	adaptin ear-binding coat-associated protein 1-like					GO:0016020|GO:0030125	membrane|clathrin vesicle coat
6087_0:003d7b	LOC100205832	100205832	protein_coding	1.26563	1053	1	2.53125	0				XP_002161900.2	LOC100205832		100205832	uncharacterized protein LOC100205832 isoform X1					GO:0005634|GO:0005654	nucleus|nucleoplasm
	LOC105846145	105846145	lncRNA	1.26562	1054	1	2.53125	0
6087_0:002785	LOC100215194	100215194	protein_coding	1.26462	1055	1	2.38088	0.14835	uncharacterized LOC100215194(LOC100215194)		IPR003323:Ovarian tumour, otubain,	XP_012559332.1	OTUD4	T2MDP5	100215194	OTU domain-containing protein 4	GO:0034122|GO:1903093|GO:1901537|GO:0070536|GO:2000660|GO:0071108	negative regulation of toll-like receptor signaling pathway|regulation of protein K48-linked deubiquitination|positive regulation of DNA demethylation|protein K63-linked deubiquitination|negative regulation of interleukin-1-mediated signaling pathway|protein K48-linked deubiquitination	GO:0061578|GO:0004843|GO:0032947	Lys63-specific deubiquitinase activity|thiol-dependent ubiquitin-specific protease activity|NA
	LOC105848259	105848259	lncRNA	1.26432	1056	1	2.52863	0
6087_0:0025cb	LOC100209541	100209541	protein_coding	1.26384	1057	1	2.33256	0.195122				XP_012558997.1	LOC100209541		100209541	LOW QUALITY PROTEIN: very-long-chain enoyl-CoA reductase-like	GO:0055114|GO:0006629|GO:0042761	NA|lipid metabolic process|very long-chain fatty acid biosynthetic process	GO:0016627|GO:0016491	oxidoreductase activity, acting on the CH-CH group of donors|oxidoreductase activity	GO:0005737|GO:0016021|GO:0005783|GO:0016020	cytoplasm|integral component of membrane|endoplasmic reticulum|membrane
6087_0:001940	LOC100209098	100209098	protein_coding	1.26355	1058	1	2.20773	0.319377	probable splicing factor, arginine/serine-rich 6(LOC100209098)	hmg03040:Spliceosome,		XP_002166415.1	LOC100209098		100209098	probable splicing factor, arginine/serine-rich 6			GO:0008270|GO:0003676	zinc ion binding|nucleic acid binding
6087_0:0017cd	LOC105844268	105844268	protein_coding	1.26338	1059	2	1.91727	0.609497				XP_012556167.1	LOC105844268		105844268	thyrotroph embryonic factor-like
6087_0:00263d	LOC100204701	100204701	protein_coding	1.26238	1060	1	2.52475	0	proteasome subunit beta type-7-like(LOC100204701)	hmg03050:Proteasome,		XP_012559095.1	LOC100204701		100204701	proteasome subunit beta type-7-like	GO:0051603|GO:0043161|GO:0010499	proteolysis involved in cellular protein catabolic process|proteasome-mediated ubiquitin-dependent protein catabolic process|proteasomal ubiquitin-independent protein catabolic process	GO:0004298|GO:0016787	threonine-type endopeptidase activity|hydrolase activity	GO:0005737|GO:0005634|GO:0000502|GO:0034515|GO:0019774	cytoplasm|nucleus|proteasome complex|proteasome storage granule|proteasome core complex, beta-subunit complex
6087_0:00489c	LOC105849832	105849832	protein_coding	1.26177	1061	1	2.52353	0				XP_012565728.1	LOC105849832		105849832	uncharacterized protein LOC105849832	GO:0015074	DNA integration	GO:0003676	nucleic acid binding
6087_0:003209	LOC100209752	100209752	protein_coding	1.26081	1062	2	2.05402	0.467608				XP_002160695.1	LOC100209752		100209752	uncharacterized protein LOC100209752
	LOC105846695	105846695	lncRNA	1.26077	1063	1	2.52154	0
6087_0:003d90	LOC105848207	105848207	protein_coding	1.25819	1064	1	2.51638	0				XP_012563678.1	LOC105848207		105848207	uncharacterized protein LOC105848207
6087_0:004285	LOC100211294	100211294	protein_coding	1.25558	1065	1	2.51116	0	barrier-to-autointegration factor B-like(LOC100211294)		IPR004122:Barrier- to-autointegration factor, BAF,	XP_002160122.1	BANF1	T2MIL1	100211294	Barrier-to-autointegration factor
6087_0:000d4e	LOC100207420	100207420	protein_coding	1.25251	1066	2	1.98014	0.524874	pyruvate dehydrogenase E1 component subunit beta, mitochondrial-like(LOC100207420)	hmg00010:Glycolysis / Gluconeogenesis,hmg00020:Citrate cycle (TCA cycle),hmg00620:Pyruvate metabolism,hmg01100:Metabolic pathways,hmg01130:Biosynthesis of antibiotics,hmg01200:Carbon metabolism,		XP_012553987.1	LOC100207420		100207420	pyruvate dehydrogenase E1 component subunit beta, mitochondrial-like	GO:0006086	acetyl-CoA biosynthetic process from pyruvate	GO:0003824|GO:0004739	catalytic activity|pyruvate dehydrogenase (acetyl-transferring) activity	GO:0005739	mitochondrion
6087_0:0016ab	LOC100209749	100209749	protein_coding	1.2494	1067	2	1.93823	0.560568	syntaxin-7-like(LOC100209749)	hmg04130:SNARE interactions in vesicular transport,hmg04145:Phagosome,	IPR000727:Target SNARE coiled-coil domain,IPR006011:Syntaxin, N-terminal,IPR006012:Syntaxin/epimorphin, conserved site,IPR010989:t-SNARE,	XP_012555938.1	STX7	T2MJB0	100209749	Syntaxin-7					GO:0016020|GO:0005622|GO:0016021	membrane|intracellular anatomical structure|integral component of membrane
6087_0:000a03	LOC100208141	100208141	protein_coding	1.24928	1068	2	2.06971	0.428852				XP_004206309.1	LOC100208141		100208141	glutamic acid-rich protein-like
6087_0:0035a8	LOC101236740	101236740	protein_coding	1.24742	1069	2	1.97105	0.523792				XP_004210627.1	LOC101236740		101236740	cAMP-dependent protein kinase regulatory subunit-like	GO:0045859|GO:0001932|GO:2000480	regulation of protein kinase activity|regulation of protein phosphorylation|negative regulation of cAMP-dependent protein kinase activity	GO:0008603|GO:0000166|GO:0030552|GO:0004862|GO:0034236	cAMP-dependent protein kinase regulator activity|nucleotide binding|cAMP binding|cAMP-dependent protein kinase inhibitor activity|protein kinase A catalytic subunit binding	GO:0005952	cAMP-dependent protein kinase complex
6087_0:002318	LOC100209384	100209384	protein_coding	1.24578	1070	2	2.00184	0.489723	proteasome subunit alpha type-3-like(LOC100209384)	hmg03050:Proteasome,	IPR000426:Proteasome, alpha-subunit, N-terminal domain,IPR001353:Proteasome, subunit alpha/beta,IPR023332:Proteasome A-type subunit,	XP_002156265.2	PSMA3	T2MGY2	100209384	Proteasome endopeptidase complex	GO:0006508|GO:0051603|GO:0010499|GO:0043161	proteolysis|proteolysis involved in cellular protein catabolic process|proteasomal ubiquitin-independent protein catabolic process|proteasome-mediated ubiquitin-dependent protein catabolic process	GO:0008233|GO:0016787|GO:0004298	peptidase activity|hydrolase activity|threonine-type endopeptidase activity	GO:0019773|GO:0000502|GO:0005634|GO:0005737	proteasome core complex, alpha-subunit complex|proteasome complex|nucleus|cytoplasm
6087_0:0006bd	LOC100205271	100205271	protein_coding	1.24555	1071	2	1.78254	0.708563				XP_002165881.1	LOC100205271		100205271	BUB3-interacting and GLEBS motif-containing protein ZNF207-like isoform X1	GO:0090307|GO:0050821|GO:0051983|GO:0007094	mitotic spindle assembly|protein stabilization|regulation of chromosome segregation|mitotic spindle assembly checkpoint	GO:0003676|GO:0008201|GO:0008017	nucleic acid binding|heparin binding|microtubule binding	GO:0005634|GO:1990047|GO:0005730|GO:0005654	nucleus|spindle matrix|nucleolus|nucleoplasm
6087_0:0010d2	LOC100203494	100203494	protein_coding	1.24512	1072	2	1.82467	0.665569	Krueppel-like factor 3(LOC100203494)		IPR007087:Zinc finger, C2H2,IPR013087:Zinc finger C2H2-type/integrase DNA-binding domain,IPR015880:Zinc finger, C2H2-like,	XP_002167297.1	KLF11	T2MJ10	100203494	Krueppel-like factor 11			GO:0003676	nucleic acid binding
6087_0:000526	LOC100209532	100209532	protein_coding	1.24496	1073	1	2.19847	0.291455	proteasome subunit alpha type-2-like(LOC100209532)	hmg03050:Proteasome,	IPR000426:Proteasome, alpha-subunit, N-terminal domain,IPR001353:Proteasome, subunit alpha/beta,IPR023332:Proteasome A-type subunit,	XP_002166196.3	PSMA2	T2MG07	100209532	Proteasome subunit alpha type	GO:0006508|GO:0051603|GO:0010499|GO:0043161	proteolysis|proteolysis involved in cellular protein catabolic process|proteasomal ubiquitin-independent protein catabolic process|proteasome-mediated ubiquitin-dependent protein catabolic process	GO:0008233|GO:0016787|GO:0004298	peptidase activity|hydrolase activity|threonine-type endopeptidase activity	GO:0019773|GO:0000502|GO:0005634|GO:0005737	proteasome core complex, alpha-subunit complex|proteasome complex|nucleus|cytoplasm
6087_0:001305	LOC100211707	100211707	protein_coding	1.24439	1074	2	1.96802	0.520769				XP_002158978.2	LOC100211707		100211707	fermitin family homolog 2-like	GO:0007229	integrin-mediated signaling pathway			GO:0005856	cytoskeleton
6087_0:002dd1	LOC100209629	100209629	protein_coding	1.24326	1075	2	1.92872	0.557809				XP_012560593.1	LOC100209629		100209629	protein MAK16 homolog	GO:0000466|GO:0000463|GO:0042273|GO:0000460|GO:0000470	maturation of 5.8S rRNA from tricistronic rRNA transcript (SSU-rRNA, 5.8S rRNA, LSU-rRNA)|maturation of LSU-rRNA from tricistronic rRNA transcript (SSU-rRNA, 5.8S rRNA, LSU-rRNA)|ribosomal large subunit biogenesis|maturation of 5.8S rRNA|maturation of LSU-rRNA			GO:0030687|GO:0005634|GO:0005730	preribosome, large subunit precursor|nucleus|nucleolus
6087_0:002ff7	LOC100206663	100206663	protein_coding	1.24291	1076	1	2.09423	0.391591				XP_002156766.3	LOC100206663		100206663	putative phospholipase B-like 2	GO:0006629	lipid metabolic process	GO:0016787	hydrolase activity
6087_0:002209	LOC100211792	100211792	protein_coding	1.24143	1077	1	2.14243	0.340429	probable phosphoglycerate kinase(LOC100211792)	hmg00010:Glycolysis / Gluconeogenesis,hmg01100:Metabolic pathways,hmg01130:Biosynthesis of antibiotics,hmg01200:Carbon metabolism,hmg01230:Biosynthesis of amino acids,	IPR001576:Phosphoglycerate kinase,IPR015824:Phosphoglycerate kinase, N-terminal,IPR015901:Phosphoglycerate kinase, C-terminal,IPR015911:Phosphoglycerate kinase, conserved site,	XP_012558220.1	PGK1	T2MH08	100211792	Phosphoglycerate kinase	GO:0016310	phosphorylation	GO:0004618|GO:0005524|GO:0016301|GO:0016740	phosphoglycerate kinase activity|ATP binding|kinase activity|transferase activity
6087_0:0020ea	LOC100201328	100201328	protein_coding	1.24013	1078	2	2.06914	0.411121	dual specificity mitogen-activated protein kinase kinase 7-like(LOC100201328)	hmg04141:Protein processing in endoplasmic reticulum,	IPR000719:Protein kinase, catalytic domain,IPR008271:Serine/threonine-protein kinase, active site,IPR011009:Protein kinase-like domain,	XP_002162140.3	MAP2K7	T2MJ59	100201328	Dual specificity mitogen-activated protein kinase kinase 7	GO:0006468|GO:0031098|GO:0032147|GO:0007346|GO:0042981|GO:0023014	protein phosphorylation|stress-activated protein kinase signaling cascade|activation of protein kinase activity|regulation of mitotic cell cycle|regulation of apoptotic process|NA	GO:0005524	ATP binding	GO:0005737	cytoplasm
6087_0:000543	LOC105847006	105847006	protein_coding	1.23861	1079	1	2.18725	0.289964	RNA-binding protein pno1-like(LOC105847006)		IPR004087:K Homology domain,IPR004088:K Homology domain, type 1,	XP_012561715.1	PNO1	T2M5A3	105847006	RNA-binding protein PNO1			GO:0003676	nucleic acid binding	GO:0005730	nucleolus
6087_0:001dee	LOC105844853	105844853	protein_coding	1.23792	1080	2	2.01675	0.459085				XP_012557373.1	Hym-355	Q9U8U7	105844853	Hym-355 preprohormone
6087_0:00107d	LOC100203125	100203125	protein_coding	1.23752	1081	1	2.19935	0.27569				XP_012554659.1	LOC100203125		100203125	splicing factor 1-like			GO:0008270|GO:0003676|GO:0045131	zinc ion binding|nucleic acid binding|pre-mRNA branch point binding
6087_0:0044d7	LOC100203529	100203529	protein_coding	1.23726	1082	2	1.76811	0.706416				XP_012565030.1	LOC100203529		100203529	synapse differentiation-inducing gene protein 1-like	GO:0009607	response to biotic stimulus			GO:0016021|GO:0016020	integral component of membrane|membrane
6087_0:0025e0	LOC100210227	100210227	protein_coding	1.23703	1083	1	2.18447	0.289593	ras-related protein Rab-21-like(LOC100210227)		IPR001806:Small GTPase superfamily,IPR005225:Small GTP-binding protein domain,IPR027417:P-loop containing nucleoside triphosphate hydrolase,	XP_002167019.2	RAB21	T2M3Z8	100210227	Ras-related protein Rab-21	GO:0030100	regulation of endocytosis	GO:0003924|GO:0005525	GTPase activity|GTP binding	GO:0005769	early endosome
6087_0:0008d2	LOC100205882	100205882	protein_coding	1.23695	1084	2	1.76967	0.704239	10 kDa heat shock protein, mitochondrial-like(LOC100205882)		IPR011032:GroES-like,IPR018369:Chaperonin Cpn10, conserved site,IPR020818:Chaperonin Cpn10,	XP_002162621.1	HSPE1	T2MFC4	100205882	10 kDa heat shock protein,mitochondrial	GO:0006986	response to unfolded protein	GO:0046872|GO:0051087|GO:0005524|GO:0051082	metal ion binding|chaperone binding|ATP binding|unfolded protein binding	GO:0005737	cytoplasm
6087_0:0028da	LOC100210081	100210081	protein_coding	1.23562	1085	2	1.91991	0.551342	casein kinase I isoform alpha(LOC100210081)	hmg04310:Wnt signaling pathway,hmg04340:Hedgehog signaling pathway,	IPR000719:Protein kinase, catalytic domain,IPR008271:Serine/threonine-protein kinase, active site,IPR011009:Protein kinase-like domain,IPR017441:Protein kinase, ATP binding site,	XP_012559599.1	CSNK1A1	T2MFK8	100210081	Casein kinase I isoform alpha	GO:0006468|GO:0018105|GO:0006909	protein phosphorylation|peptidyl-serine phosphorylation|phagocytosis	GO:0005524|GO:0000166	ATP binding|nucleotide binding	GO:0005634|GO:0005737	nucleus|cytoplasm
6087_0:002301	LOC105845338	105845338	protein_coding	1.2355	1086	2	1.19699	1.27401				XP_012558424.1	LOC105845338		105845338	proto-oncogene c-Fos-like	GO:0071277	cellular response to calcium ion			GO:0035976|GO:0005634	transcription factor AP-1 complex|nucleus
6087_0:0018cf	LOC105844361	105844361	protein_coding	1.23548	1087	2	1.69831	0.772649				XP_012556349.1	LOC105844361		105844361	uncharacterized protein LOC105844361
6087_0:004b12	LOC100204317	100204317	protein_coding	1.23298	1088	1	2.09298	0.372976				XP_002163925.2	LOC100204317		100204317	uncharacterized protein LOC100204317			GO:0005524	ATP binding
6087_0:001952	LOC100204492	100204492	protein_coding	1.23047	1089	2	2.00463	0.456313				XP_002164497.1	LOC100204492		100204492	cofilin-like	GO:0030042	actin filament depolymerization	GO:0003779|GO:0051015	actin binding|actin filament binding	GO:0015629|GO:0005622	actin cytoskeleton|intracellular anatomical structure
6087_0:0037c7	LOC100200012	100200012	protein_coding	1.22951	1090	1	2.34612	0.112905				XP_012562569.1	LOC100200012		100200012	uncharacterized protein LOC100200012
	LOC105849747	105849747	lncRNA	1.22915	1091	1	2.45831	0
6087_0:0016dc	piwil1		protein_coding	1.22884	1092	1	2.16515	0.292523				NP_001274302.1	PIWIL1	T2M7W7	100201838	Hwyi	GO:0031047	gene silencing by RNA	GO:0003676	nucleic acid binding
6087_0:002b32	LOC100211996	100211996	protein_coding	1.22823	1093	1	2.30406	0.152407				XP_012560057.1	LOC100211996		100211996	myb-like protein X
	LOC100200609	100200609	lncRNA	1.22771	1094	1	2.45543	0
6087_0:000d10	LOC100204495	100204495	protein_coding	1.22755	1095	1	2.45509	0				XP_002163685.2	LOC100204495		100204495	uncharacterized protein LOC100204495
6087_0:000762	LOC100207482	100207482	protein_coding	1.22719	1096	1	2.33842	0.115957				XP_002154525.2	LOC100207482		100207482	talin-2	GO:0007016	NA	GO:0051015|GO:0005200|GO:0003779|GO:0005158	actin filament binding|structural constituent of cytoskeleton|actin binding|insulin receptor binding	GO:0005856|GO:0001726	cytoskeleton|ruffle
	LOC105845932	105845932	lncRNA	1.22706	1097	1	2.45412	0
6087_0:002da2	LOC100204448	100204448	protein_coding	1.22633	1098	2	1.91585	0.5368				XP_002162061.3	LOC100204448		100204448	E3 ubiquitin-protein ligase Itchy-like	GO:0043161|GO:0016567	proteasome-mediated ubiquitin-dependent protein catabolic process|protein ubiquitination	GO:0016740	transferase activity	GO:0005737	cytoplasm
6087_0:002540	LOC100207753	100207753	protein_coding	1.22373	1099	1	2.43642	0.0110441				XP_012558890.1	LOC100207753		100207753	MAM and LDL-receptor class A domain-containing protein 1-like					GO:0016020	membrane
6087_0:0006bf	LOC100199809	100199809	protein_coding	1.22345	1100	1	2.28879	0.158105	eukaryotic peptide chain release factor GTP-binding subunit ERF3A-like(LOC100199809)	hmg03015:mRNA surveillance pathway,		XP_002154397.3	LOC100199809		100199809	eukaryotic peptide chain release factor GTP-binding subunit ERF3A-like	GO:0002184	cytoplasmic translational termination	GO:0003924|GO:0005525	GTPase activity|GTP binding	GO:0005829|GO:0018444	cytosol|translation release factor complex
6087_0:002f08	LOC100203445	100203445	protein_coding	1.22132	1101	1	2.29098	0.151653				XP_012560844.1	LOC100203445		100203445	phosphatidylinositol-binding clathrin assembly protein LAP-like	GO:0048268	clathrin coat assembly	GO:0005545|GO:0005543|GO:0030276	1-phosphatidylinositol binding|phospholipid binding|clathrin binding	GO:0030136	clathrin-coated vesicle
6087_0:001c3d	LOC100212421	100212421	protein_coding	1.2189	1102	1	2.43781	0				XP_012557034.1	LOC100212421		100212421	uncharacterized protein LOC100212421	GO:0006281|GO:0000723|GO:0032508|GO:0006310	DNA repair|telomere maintenance|DNA duplex unwinding|DNA recombination	GO:0005524|GO:0016787|GO:0004386|GO:0000166	ATP binding|hydrolase activity|helicase activity|nucleotide binding
6087_0:002a99	LOC100215979	100215979	protein_coding	1.2174	1103	2	2.03056	0.404236	actin-related protein 2/3 complex subunit 4(LOC100215979)	hmg04144:Endocytosis,	IPR008384:ARP2/3 complex, 20kDa subunit (P20-Arc),	XP_002167090.1	ARPC4	T2MEY5	100215979	Actin-related protein 2/3 complex subunit 4	GO:0034314|GO:0030833|GO:0030041	Arp2/3 complex-mediated actin nucleation|regulation of actin filament polymerization|actin filament polymerization	GO:0003779	actin binding	GO:0005885|GO:0005737|GO:0015629|GO:0005856	Arp2/3 protein complex|cytoplasm|actin cytoskeleton|cytoskeleton
6087_0:00434b	LOC100203380	100203380	protein_coding	1.21704	1104	1	2.43408	0				XP_002170648.3	LOC100203380		100203380	alcohol dehydrogenase	GO:0055114	NA	GO:0016491	oxidoreductase activity
6087_0:003dc4	LOC100214959	100214959	protein_coding	1.2159	1105	1	2.4318	0				XP_012563711.1	LOC100214959		100214959	protein DD3-3-like					GO:0016021	integral component of membrane
6087_0:001182	LOC100214225	100214225	protein_coding	1.21524	1106	2	1.34612	1.08436				XP_002155064.2	LOC100214225		100214225	translocation protein SEC62-like					GO:0016021|GO:0016020|GO:0030176	integral component of membrane|membrane|integral component of endoplasmic reticulum membrane
6087_0:003458	LOC100204926	100204926	protein_coding	1.21477	1107	1	2.06438	0.365166	transmembrane emp24 domain-containing protein-like(LOC100204926)		IPR009038:GOLD,IPR015720:TMP21-related,	XP_002156614.1	TMED2	T2MCI6	100204926	Transmembrane emp24 domain-containing protein 2					GO:0016020|GO:0016021|GO:0005783|GO:0030659	membrane|integral component of membrane|endoplasmic reticulum|cytoplasmic vesicle membrane
	LOC105846985	105846985	lncRNA	1.21437	1108	2	0.922124	1.50662
	LOC101237281	101237281	lncRNA	1.21416	1109	1	2.42833	0
6087_0:0026f3	LOC100196976	100196976	protein_coding	1.21409	1110	1	2.12133	0.306841	peptidyl-prolyl cis-trans isomerase 5-like(LOC100196976)		IPR002130:Cyclophilin-like peptidyl-prolyl cis-trans isomerase domain,IPR020892:Cyclophilin-type peptidyl-prolyl cis-trans isomerase, conserved site,IPR024936:Cyclophilin-type peptidyl-prolyl cis-trans isomerase,	XP_002155900.2	PPIB	T2MH25	100196976	Peptidyl-prolyl cis-trans isomerase	GO:0000413	protein peptidyl-prolyl isomerization	GO:0016853	isomerase activity
6087_0:0007df	LOC101240621	101240621	protein_coding	1.21221	1111	2	1.44136	0.983063				XP_004206112.1	LOC101240621		101240621	probable nucleoredoxin 1			GO:0004791	thioredoxin-disulfide reductase activity	GO:0005737	cytoplasm
6087_0:003a4e	LOC100213558	100213558	protein_coding	1.20927	1112	1	2.27403	0.1445				XP_002163433.3	LOC100213558		100213558	SCO-spondin-like			GO:0030414|GO:0005488	peptidase inhibitor activity|binding	GO:0016021	integral component of membrane
6087_0:0046a9	LOC101236367	101236367	protein_coding	1.20915	1113	1	2.41831	0				XP_004212407.2	LOC101236367		101236367	sorting nexin-2-like	GO:0042147|GO:0072673|GO:0016050|GO:0034498	retrograde transport, endosome to Golgi|lamellipodium morphogenesis|vesicle organization|early endosome to Golgi transport	GO:0042803|GO:0046982|GO:0035091|GO:1990459|GO:0045296|GO:1990460|GO:0005158	protein homodimerization activity|protein heterodimerization activity|phosphatidylinositol binding|transferrin receptor binding|cadherin binding|leptin receptor binding|insulin receptor binding	GO:0030905|GO:0005737|GO:0016020|GO:0010008|GO:0005764|GO:0005768|GO:0030904|GO:0005829	retromer, tubulation complex|cytoplasm|membrane|endosome membrane|lysosome|endosome|retromer complex|cytosol
6087_0:001a55	LOC100208415	100208415	protein_coding	1.20871	1114	1	2.25245	0.164978				XP_012556654.1	LOC100208415		100208415	cytospin-A-like isoform X1
6087_0:00102e	LOC100202503	100202503	protein_coding	1.20715	1115	2	1.96487	0.44943				XP_012554597.1	LOC100202503		100202503	50 kDa hatching enzyme-like	GO:0006508	proteolysis	GO:0008237|GO:0004222|GO:0008270	metallopeptidase activity|metalloendopeptidase activity|zinc ion binding
6087_0:003a0c	LOC100208392	100208392	protein_coding	1.2067	1116	1	2.24751	0.165897				XP_012563008.1	LOC100208392		100208392	uncharacterized protein LOC100208392
6087_0:0025ef	LOC100200555	100200555	protein_coding	1.2045	1117	2	1.57466	0.834348				XP_002163381.1	LOC100200555		100200555	uncharacterized protein LOC100200555
6087_0:0046d9	LOC105849557	105849557	protein_coding	1.20304	1118	1	2.40609	0				XP_012565407.1	LOC105849557		105849557	integumentary mucin C.1-like
6087_0:0018e0	LOC100213887	100213887	protein_coding	1.20282	1119	1	2.25632	0.149313				XP_012556367.1	LOC100213887		100213887	uncharacterized protein Y39B6A.33-like isoform X2	GO:0050821|GO:0042981|GO:1902570|GO:0051898|GO:0039535|GO:1901796|GO:0014067|GO:1901837|GO:0000027|GO:0032435|GO:0071456|GO:1903006|GO:0031333|GO:0006281|GO:1901797|GO:0032436|GO:1903715|GO:0007095|GO:0001932	protein stabilization|regulation of apoptotic process|protein localization to nucleolus|negative regulation of protein kinase B signaling|regulation of RIG-I signaling pathway|regulation of signal transduction by p53 class mediator|negative regulation of phosphatidylinositol 3-kinase signaling|negative regulation of transcription of nucleolar large rRNA by RNA polymerase I|ribosomal large subunit…	GO:0019843|GO:0008097|GO:0042802|GO:0002039	rRNA binding|5S rRNA binding|identical protein binding|p53 binding	GO:0005730|GO:0033553|GO:0001650|GO:0043231|GO:0005654|GO:0005829	nucleolus|rDNA heterochromatin|fibrillar center|intracellular membrane-bounded organelle|nucleoplasm|cytosol
6087_0:003ca3	LOC101238909	101238909	protein_coding	1.20244	1120	1	2.00563	0.399252				XP_004211356.1	LOC101238909		101238909	uncharacterized protein LOC101238909
6087_0:002cd2	LOC105846313	105846313	protein_coding	1.20243	1121	1	2.40487	0				XP_012560375.1	LOC105846313		105846313	uncharacterized protein LOC105846313					GO:0016020|GO:0016021	membrane|integral component of membrane
6087_0:003db8	LOC100210170	100210170	protein_coding	1.20162	1122	2	1.86151	0.541724	malate dehydrogenase, mitochondrial-like(LOC100210170)	hmg00020:Citrate cycle (TCA cycle),hmg00270:Cysteine and methionine metabolism,hmg00620:Pyruvate metabolism,hmg00630:Glyoxylate and dicarboxylate metabolism,hmg01100:Metabolic pathways,hmg01130:Biosynthesis of antibiotics,hmg01200:Carbon metabolism,	IPR001236:Lactate/malate dehydrogenase, N-terminal,IPR001557:L-lactate/malate dehydrogenase,IPR010097:Malate dehydrogenase, type 1,IPR015955:Lactate dehydrogenase/glycoside hydrolase, family 4, C-terminal,IPR016040:NAD(P)-binding domain,IPR022383:Lactate/malate dehydrogenase, C-terminal,	XP_002159962.1	MDH2	T2MGF7	100210170	Malate dehydrogenase,mitochondrial	GO:0019752|GO:0006108|GO:0006099|GO:0055114	carboxylic acid metabolic process|malate metabolic process|tricarboxylic acid cycle|NA	GO:0016615|GO:0003824|GO:0016616|GO:0016491|GO:0030060	malate dehydrogenase activity|catalytic activity|oxidoreductase activity, acting on the CH-OH group of donors, NAD or NADP as acceptor|oxidoreductase activity|L-malate dehydrogenase activity
6087_0:00387f	LOC100215588	100215588	protein_coding	1.20096	1123	1	2.40192	0				XP_012562708.1	LOC100215588		100215588	transaldolase-like	GO:0006098	pentose-phosphate shunt	GO:0004801|GO:0003824|GO:0016740	sedoheptulose-7-phosphate:D-glyceraldehyde-3-phosphate glyceronetransferase activity|catalytic activity|transferase activity	GO:0005737	cytoplasm
6087_0:0044f7	LOC100213051	100213051	protein_coding	1.19804	1124	1	2.21051	0.185568				XP_002167195.2	LOC100213051		100213051	rab GDP dissociation inhibitor alpha-like	GO:0007264	small GTPase mediated signal transduction	GO:0005092|GO:0005093|GO:0016491	GDP-dissociation inhibitor activity|Rab GDP-dissociation inhibitor activity|oxidoreductase activity	GO:0005737|GO:0005622	cytoplasm|intracellular anatomical structure
	LOC100200471	100200471	lncRNA	1.19694	1125	1	2.39387	0
	LOC105843340	105843340	lncRNA	1.19686	1126	1	2.39371	0
6087_0:0022ea	LOC100207925	100207925	protein_coding	1.19544	1127	1	2.39087	0	phenylalanine--tRNA ligase beta subunit-like(LOC100207925)	hmg00970:Aminoacyl-tRNA biosynthesis,		XP_002160617.2	LOC100207925		100207925	phenylalanine--tRNA ligase beta subunit-like	GO:0006432	phenylalanyl-tRNA aminoacylation	GO:0000287|GO:0000166|GO:0004826|GO:0005524	magnesium ion binding|nucleotide binding|phenylalanine-tRNA ligase activity|ATP binding	GO:0005737|GO:0009328	cytoplasm|phenylalanine-tRNA ligase complex
6087_0:0030ce	LOC100207624	100207624	protein_coding	1.19368	1128	1	2.38736	0				XP_002157647.3	LOC100207624		100207624	PIN2/TERF1-interacting telomerase inhibitor 1-like	GO:0070198|GO:0010972|GO:1902570|GO:0051974|GO:1904751|GO:0007080|GO:0032211|GO:1904744|GO:0031397|GO:0007004|GO:0031647	protein localization to chromosome, telomeric region|negative regulation of G2/M transition of mitotic cell cycle|protein localization to nucleolus|negative regulation of telomerase activity|positive regulation of protein localization to nucleolus|mitotic metaphase plate congression|negative regulation of telomere maintenance via telomerase|positive regulation of telomeric DNA binding|negative re…	GO:0003676|GO:0070034|GO:0010521	nucleic acid binding|telomerase RNA binding|telomerase inhibitor activity	GO:0000228|GO:0005819|GO:0005730|GO:0000781|GO:0000784	nuclear chromosome|spindle|nucleolus|chromosome, telomeric region|NA
6087_0:001861	LOC100215411	100215411	protein_coding	1.19243	1129	1	2.25236	0.132506	eukaryotic translation initiation factor 4B-like(LOC100215411)	hmg03013:RNA transport,hmg04150:mTOR signaling pathway,		XP_002159289.3	LOC100215411		100215411	eukaryotic translation initiation factor 4B-like	GO:0001731|GO:0097010	formation of translation preinitiation complex|eukaryotic translation initiation factor 4F complex assembly	GO:0043024|GO:0003676|GO:0034057|GO:0033592	ribosomal small subunit binding|nucleic acid binding|RNA strand-exchange activity|RNA strand annealing activity	GO:0016281|GO:0005844	eukaryotic translation initiation factor 4F complex|polysome
6087_0:0014b3	LOC100201609	100201609	protein_coding	1.19184	1130	1	2.38368	0				XP_012555534.1	LOC100201609		100201609	T-complex protein 1 subunit theta-like	GO:0006458|GO:0061077	'de novo' protein folding|chaperone-mediated protein folding	GO:0044183|GO:0051082|GO:0005524|GO:0000166	protein folding chaperone|unfolded protein binding|ATP binding|nucleotide binding	GO:0005832|GO:0005737	chaperonin-containing T-complex|cytoplasm
6087_0:0015fb	LOC100215883	100215883	protein_coding	1.19074	1131	2	1.75938	0.622102				XP_002163010.1	LOC100215883		100215883	uncharacterized protein LOC100215883
6087_0:0002ce	LOC100199966	100199966	protein_coding	1.19052	1132	1	2.29989	0.0811405	metastasis-associated protein MTA3-like(LOC100199966)		IPR000679:Zinc finger, GATA-type,IPR000949:ELM2 domain,IPR001025:Bromo adjacent homology (BAH) domain,IPR007087:Zinc finger, C2H2,IPR009057:Homeodomain-like,IPR013087:Zinc finger C2H2-type/integrase DNA-binding domain,IPR015880:Zinc finger, C2H2-like,IPR017884:SANT domain,	XP_002167188.2	MTA1	T2MD61	100199966	Metastasis-associated protein MTA1			GO:0008270|GO:0003682|GO:0043565	zinc ion binding|chromatin binding|sequence-specific DNA binding	GO:0005634	nucleus
6087_0:003d76	LOC100215181	100215181	protein_coding	1.18993	1133	1	2.02218	0.357676				XP_012563661.1	LOC100215181		100215181	myophilin-like
6087_0:002450	LOC100209537	100209537	protein_coding	1.18837	1134	1	2.37674	0	mitogen-activated protein kinase 1-like(LOC100209537)	hmg04068:FoxO signaling pathway,hmg04150:mTOR signaling pathway,hmg04320:Dorso-ventral axis formation,hmg04350:TGF-beta signaling pathway,	IPR000719:Protein kinase, catalytic domain,IPR003527:Mitogen-activated protein (MAP) kinase, conserved site,IPR008271:Serine/threonine-protein kinase, active site,IPR008349:Mitogen-activated protein (MAP) kinase, ERK1/2,IPR011009:Protein kinase-like domain,IPR017441:Protein kinase, ATP binding site,	XP_002154499.3	MAPK1	T2MFY0	100209537	Mitogen-activated protein kinase	GO:0016310|GO:0006468|GO:0007166|GO:0010468|GO:0071310|GO:0000165	phosphorylation|protein phosphorylation|cell surface receptor signaling pathway|regulation of gene expression|cellular response to organic substance|MAPK cascade	GO:0005524|GO:0016301|GO:0016740|GO:0000166	ATP binding|kinase activity|transferase activity|nucleotide binding	GO:0005634|GO:0005737|GO:0005622	nucleus|cytoplasm|intracellular anatomical structure
6087_0:000efa	LOC100198833	100198833	protein_coding	1.18779	1135	1	2.37558	0				XP_002154773.2	LOC100198833		100198833	SH3 domain-containing kinase-binding protein 1-like					GO:0005737|GO:0005911	cytoplasm|cell-cell junction
6087_0:003f14	LOC105848407	105848407	protein_coding	1.18689	1136	1	2.37378	0				XP_012563968.1	LOC105848407		105848407	uncharacterized protein LOC105848407
6087_0:00246c	LOC101241826	101241826	protein_coding	1.18579	1137	2	1.14909	1.22248				XP_012558732.1	LOC101241826		101241826	gamma-glutamyltranspeptidase 1-like	GO:0006508|GO:0006751	proteolysis|glutathione catabolic process	GO:0036374	glutathione hydrolase activity
6087_0:0019cf	LOC100197273	100197273	protein_coding	1.18556	1138	1	2.3146	0.0565199				XP_002163748.2	LOC100197273		100197273	splicing factor, arginine/serine-rich 15-like			GO:0003676	nucleic acid binding	GO:0005654	nucleoplasm
6087_0:001117	LOC100207390	100207390	protein_coding	1.18425	1139	2	1.7498	0.618706	26S proteasome non-ATPase regulatory subunit 8-like(LOC100207390)	hmg03050:Proteasome,	IPR006746:26S proteasome non-ATPase regulatory subunit Rpn12,	XP_012554800.1	PSMD8	T2MFL0	100207390	26S proteasome non-ATPase regulatory subunit 8	GO:0006508|GO:0043248|GO:0043161	proteolysis|proteasome assembly|proteasome-mediated ubiquitin-dependent protein catabolic process			GO:0005838|GO:0005634|GO:0008541|GO:0005829	proteasome regulatory particle|nucleus|proteasome regulatory particle, lid subcomplex|cytosol
6087_0:002475	LOC100214054	100214054	protein_coding	1.18345	1140	1	2.36689	0				XP_012558736.1	LOC100214054		100214054	thyroid receptor-interacting protein 11-like	GO:0007030|GO:0003281|GO:0060348|GO:0060122|GO:0003413|GO:0006486|GO:0007018	Golgi organization|ventricular septum development|bone development|inner ear receptor cell stereocilium organization|chondrocyte differentiation involved in endochondral bone morphogenesis|protein glycosylation|microtubule-based movement	GO:0008017|GO:0003777|GO:0005524	microtubule binding|microtubule motor activity|ATP binding	GO:0005634|GO:0005801|GO:0005794|GO:0016607|GO:0002080	nucleus|cis-Golgi network|Golgi apparatus|nuclear speck|acrosomal membrane
	LOC100202911	100202911	lncRNA	1.18174	1141	2	1.44345	0.920034
6087_0:004cc0	LOC105850538	105850538	protein_coding	1.18135	1142	2	0.909092	1.4536				XP_012566458.1	LOC105850538		105850538	uncharacterized protein LOC105850538	GO:0045859	regulation of protein kinase activity			GO:0031588	nucleotide-activated protein kinase complex
6087_0:002a8a	LOC100210488	100210488	protein_coding	1.18127	1143	2	1.62387	0.738661				XP_012559938.1	LOC100210488		100210488	H/ACA ribonucleoprotein complex subunit 1-like	GO:0001522|GO:0000454	pseudouridine synthesis|snoRNA guided rRNA pseudouridine synthesis	GO:0034513	box H/ACA snoRNA binding	GO:0031429|GO:0005634|GO:0005730	box H/ACA snoRNP complex|nucleus|nucleolus
6087_0:004d6e	LOC105850685	105850685	protein_coding	1.18122	1144	1	2.36244	0				XP_012566577.1	LOC105850685		105850685	uncharacterized protein LOC105850685	GO:0006281|GO:0000723|GO:0032508|GO:0006310	DNA repair|telomere maintenance|DNA duplex unwinding|DNA recombination	GO:0005524|GO:0016787|GO:0004386|GO:0000166	ATP binding|hydrolase activity|helicase activity|nucleotide binding
6087_0:004b48	LOC100215710	100215710	protein_coding	1.17966	1145	1	1.96765	0.391664				XP_012566196.1	LOC100215710		100215710	nucleolar protein 58-like
6087_0:00209a	LOC100210286	100210286	protein_coding	1.17904	1146	1	2.35809	0	probable rRNA-processing protein EBP2(LOC100210286)		IPR008610:Eukaryotic rRNA processing,	XP_002166032.1	EBNA1BP2	T2M742	100210286	Probable rRNA-processing protein EBP2	GO:0042273|GO:0000280	ribosomal large subunit biogenesis|nuclear division	GO:0042802	identical protein binding	GO:0030687|GO:0034399|GO:0005730|GO:0044732|GO:0005634	preribosome, large subunit precursor|nuclear periphery|nucleolus|mitotic spindle pole body|nucleus
6087_0:001515	LOC100199968	100199968	protein_coding	1.17857	1147.5	1	2.35713	0				XP_002154567.1	LOC100199968		100199968	zinc finger CCHC domain-containing protein 10-like			GO:0003676|GO:0008270	nucleic acid binding|zinc ion binding
	LOC100201478	100201478	lncRNA	1.17857	1147.5	1	2.35713	0
6087_0:002d0a	LOC100200216	100200216	protein_coding	1.1784	1149	1	2.35679	0				XP_002156393.1	LOC100200216		100200216	uncharacterized protein LOC100200216			GO:0003676	nucleic acid binding
6087_0:001cae	LOC100200320	100200320	protein_coding	1.17623	1150	1	2.1068	0.245658	carbonyl reductase [NADPH] 1-like(LOC100200320)	hmg00590:Arachidonic acid metabolism,hmg00980:Metabolism of xenobiotics by cytochrome P450,hmg01100:Metabolic pathways,	IPR002347:Glucose/ribitol dehydrogenase,IPR016040:NAD(P)-binding domain,IPR020904:Short-chain dehydrogenase/reductase, conserved site,	XP_002157640.1	CBR1	T2MGU7	100200320	Carbonyl reductase	GO:0055114	NA	GO:0016491	oxidoreductase activity
6087_0:002012	LOC100205361	100205361	protein_coding	1.17497	1151	1	2.17516	0.174787				XP_004208431.2	LOC100205361		100205361	pericentriolar material 1 protein-like	GO:0034454|GO:0071539	microtubule anchoring at centrosome|protein localization to centrosome			GO:0005813	centrosome
6087_0:0040d8	LOC100206964	100206964	protein_coding	1.17271	1152	2	1.81933	0.526093				XP_002155596.2	LOC100206964		100206964	arginine and glutamate-rich protein 1-like
6087_0:000338	LOC100214324	100214324	protein_coding	1.17253	1153	1	2.08066	0.264394	adenylosuccinate synthetase-like(LOC100214324)	hmg00230:Purine metabolism,hmg00250:Alanine, aspartate and glutamate metabolism,hmg01100:Metabolic pathways,	IPR001114:Adenylosuccinate synthetase,IPR018220:Adenylosuccinate synthase, active site,IPR027417:P-loop containing nucleoside triphosphate hydrolase,	XP_012557588.1	ADSSL1	T2MAA5	100214324	Adenylosuccinate synthetase	GO:0044208|GO:0006167|GO:0006164|GO:0046040	'de novo' AMP biosynthetic process|AMP biosynthetic process|purine nucleotide biosynthetic process|IMP metabolic process	GO:0000166|GO:0046872|GO:0004019|GO:0005525|GO:0016874|GO:0000287	nucleotide binding|metal ion binding|adenylosuccinate synthase activity|GTP binding|ligase activity|magnesium ion binding	GO:0005737	cytoplasm
6087_0:004448	LOC100205916	100205916	protein_coding	1.17132	1154	1	2.34264	0	persulfide dioxygenase ETHE1, mitochondrial-like(LOC100205916)	hmg00920:Sulfur metabolism,		XP_002161783.2	LOC100205916		100205916	persulfide dioxygenase ETHE1, mitochondrial-like	GO:0006749|GO:0070813	glutathione metabolic process|hydrogen sulfide metabolic process	GO:0005506|GO:0050313	iron ion binding|sulfur dioxygenase activity	GO:0005737|GO:0005654|GO:0005739	cytoplasm|nucleoplasm|mitochondrion
6087_0:000601	LOC100211596	100211596	protein_coding	1.16998	1155	1	2.09589	0.244071				XP_002163896.1	LOC100211596		100211596	uncharacterized protein LOC100211596
6087_0:0004c3	LOC100208471	100208471	protein_coding	1.16848	1156	1	1.98626	0.350699	type 2 phosphatidylinositol 4,5-bisphosphate 4-phosphatase-like(LOC100208471)	hmg04070:Phosphatidylinositol signaling system,		XP_012560674.1	LOC100208471		100208471	type 2 phosphatidylinositol 4,5-bisphosphate 4-phosphatase-like			GO:0034597|GO:0016787	phosphatidylinositol-4,5-bisphosphate 4-phosphatase activity|hydrolase activity	GO:0016021|GO:0005765|GO:0005768|GO:0031902|GO:0005764	integral component of membrane|lysosomal membrane|endosome|late endosome membrane|lysosome
6087_0:000cad	LOC100197107	100197107	protein_coding	1.16827	1157	1	2.33653	0				XP_012553859.1	LOC100197107		100197107	contactin-2-like
6087_0:000c79	LOC100212344	100212344	protein_coding	1.16762	1158	1	1.95834	0.376907	uncharacterized LOC100212344(LOC100212344)		IPR019308:Protein of unknown function DUF2359, TMEM214,	XP_002166600.2	TMEM214	T2MBG9	100212344	Transmembrane protein 214					GO:0005794|GO:0005829|GO:0005881|GO:0005783	Golgi apparatus|cytosol|cytoplasmic microtubule|endoplasmic reticulum
6087_0:004714	LOC105849590	105849590	protein_coding	1.16717	1159	1	2.33433	0				XP_012565447.1	LOC105849590		105849590	TNF receptor-associated factor 6-A-like	GO:0016311|GO:0042981	dephosphorylation|regulation of apoptotic process	GO:0005164|GO:0008270	tumor necrosis factor receptor binding|zinc ion binding
6087_0:00126f	LOC100201729	100201729	protein_coding	1.16702	1160	2	1.92588	0.408161	LIM and SH3 domain protein 1-like(LOC100201729)		IPR000900:Nebulin 35 residue motif,IPR001452:Src homology-3 domain,IPR001781:Zinc finger, LIM-type,	XP_002156849.1	LASP1	T2MDN9	100201729	LIM and SH3 domain protein 1			GO:0046872	metal ion binding
6087_0:0048a4	LOC100212157	100212157	protein_coding	1.16592	1161	1	2.33184	0				XP_002163120.1	LOC100212157		100212157	DEAD-box ATP-dependent RNA helicase 7-like			GO:0004386|GO:0005524|GO:0003676|GO:0004004	helicase activity|ATP binding|nucleic acid binding|NA	GO:0005634|GO:0005730	nucleus|nucleolus
6087_0:00044b	LOC100211418	100211418	protein_coding	1.16582	1162	2	1.26817	1.06346				XP_012559783.1	LOC100211418		100211418	beta-1,4-N-acetylgalactosaminyltransferase 3-like			GO:0008376	acetylgalactosaminyltransferase activity	GO:0032580|GO:0016021	Golgi cisterna membrane|integral component of membrane
6087_0:000a65	LOC100213867	100213867	protein_coding	1.16484	1163	1	2.08444	0.245231	N-alpha-acetyltransferase 15, NatA auxiliary subunit-like(LOC100213867)		IPR011990:Tetratricopeptide-like helical,IPR013026:Tetratricopeptide repeat-containing domain,IPR019734:Tetratricopeptide repeat,IPR021183:N-terminal acetyltransferase A, auxiliary subunit,	XP_002163370.3	NAA15	T2M5N8	100213867	N-alpha-acetyltransferase 15, NatA auxiliary subunit	GO:0006474|GO:0050821|GO:0017196	N-terminal protein amino acid acetylation|protein stabilization|N-terminal peptidyl-methionine acetylation			GO:0005737|GO:0005829|GO:0031415	cytoplasm|cytosol|NatA complex
6087_0:001757	LOC100215665	100215665	protein_coding	1.1644	1164	2	1.66648	0.662327	tropomyosin-1(LOC100215665)		IPR000533:Tropomyosin,	XP_002165310.1	TROP1	P39921	100215665	Tropomyosin-1
6087_0:000d2d	LOC100212430	100212430	protein_coding	1.16424	1165	1	2.32849	0	nucleolar RNA helicase 2-like(LOC100212430)		IPR000629:RNA helicase, ATP-dependent, DEAD-box, conserved site,IPR001650:Helicase, C-terminal,IPR011545:DNA/RNA helicase, DEAD/DEAH box type, N-terminal,IPR012562:GUCT,IPR012677:Nucleotide-binding, alpha-beta plait,IPR014001:Helicase, superfamily 1/2, ATP-binding domain,IPR027417:P-loop containing nucleoside triphosphate hydrolase,	XP_012553955.1	DDX21	T2M5C3	100212430	Nucleolar RNA helicase 2			GO:0004386|GO:0005524|GO:0003676|GO:0004004	helicase activity|ATP binding|nucleic acid binding|NA	GO:0005634|GO:0005730	nucleus|nucleolus
6087_0:003170	LOC100205151	100205151	protein_coding	1.16416	1166	1	2.32833	0				XP_012561309.1	LOC100205151		100205151	uncharacterized protein LOC100205151					GO:0016021	integral component of membrane
6087_0:003acc	LOC105847879	105847879	protein_coding	1.1638	1167	1	2.24282	0.0847821				XP_012563164.1	LOC105847879		105847879	uncharacterized protein LOC105847879
6087_0:003679	LOC100197353	100197353	protein_coding	1.16304	1168	1	2.32607	0				XP_012562311.1	LOC100197353		100197353	puromycin-sensitive aminopeptidase-like protein	GO:0006508	proteolysis	GO:0004177|GO:0008237|GO:0008270	aminopeptidase activity|metallopeptidase activity|zinc ion binding
6087_0:002f24	LOC100197844	100197844	protein_coding	1.16265	1169	1	2.3253	0				XP_002166591.1	LOC100197844		100197844	meiosis expressed gene 1 protein homolog					GO:0005634	nucleus
6087_0:001486	LOC100199269	100199269	protein_coding	1.15865	1170	1	2.31731	0	39S ribosomal protein L10, mitochondrial-like(LOC100199269)	hmg03010:Ribosome,	IPR001790:Ribosomal protein L10/acidic P0,	XP_004207303.1	MRPL10	T2MB21	100199269	39S ribosomal protein L10,mitochondrial	GO:0032543	mitochondrial translation			GO:0005622|GO:0005762	intracellular anatomical structure|mitochondrial large ribosomal subunit
6087_0:001e68	LOC100213255	100213255	protein_coding	1.15747	1171	2	1.44789	0.867059				XP_012557474.1	LOC100213255		100213255	uncharacterized protein LOC100213255	GO:0032259	methylation	GO:0008757	S-adenosylmethionine-dependent methyltransferase activity	GO:0005737	cytoplasm
6087_0:004af9	LOC100213712	100213712	protein_coding	1.15697	1172	2	1.22885	1.08509	purine nucleoside phosphorylase-like(LOC100213712)	hmg00230:Purine metabolism,hmg00240:Pyrimidine metabolism,hmg00760:Nicotinate and nicotinamide metabolism,hmg01100:Metabolic pathways,		XP_004212932.1	LOC100213712		100213712	purine nucleoside phosphorylase-like	GO:0009116|GO:0006148|GO:0034356	nucleoside metabolic process|inosine catabolic process|NAD biosynthesis via nicotinamide riboside salvage pathway	GO:0004731|GO:0016740|GO:0003824	purine-nucleoside phosphorylase activity|transferase activity|catalytic activity
6087_0:002d03	LOC100214647	100214647	protein_coding	1.15641	1173	1	2.2097	0.103125				XP_012560413.1	LOC100214647		100214647	LOW QUALITY PROTEIN: uncharacterized protein LOC100214647	GO:0038063	collagen-activated tyrosine kinase receptor signaling pathway	GO:0005201	extracellular matrix structural constituent	GO:0005587|GO:0005581	collagen type IV trimer|collagen trimer
	LOC101241187	101241187	lncRNA	1.1544	1174	2	1.68921	0.619596
6087_0:0018c1	LOC100213136	100213136	protein_coding	1.15189	1175	1	1.92136	0.382414	putative glycine cleavage system H protein, mitochondrial(LOC100213136)	hmg00260:Glycine, serine and threonine metabolism,hmg00630:Glyoxylate and dicarboxylate metabolism,hmg01100:Metabolic pathways,hmg01130:Biosynthesis of antibiotics,	IPR000089:Biotin/lipoyl attachment,IPR002930:Glycine cleavage H-protein,IPR003016:2-oxo acid dehydrogenase, lipoyl-binding site,IPR011053:Single hybrid motif,IPR017453:Glycine cleavage H-protein, subgroup,	XP_002170182.3	GCSH	T2MH22	100213136	Glycine cleavage system H protein	GO:0019464	glycine decarboxylation via glycine cleavage system			GO:0005739	mitochondrion
6087_0:003f52	LOC105848440	105848440	protein_coding	1.15151	1176.5	1	2.30302	0				XP_012564011.1	LOC105848440		105848440	vesicle transport protein SFT2A-like					GO:0016020|GO:0016021	membrane|integral component of membrane
	LOC101239331	101239331	lncRNA	1.15151	1176.5	1	2.30302	0
6087_0:001e95	LOC100211949	100211949	protein_coding	1.15064	1178	2	1.54551	0.755766				XP_002154422.2	LOC100211949		100211949	core histone macro-H2A.1-like	GO:1901837|GO:0045814|GO:0007549|GO:0006334|GO:0071169|GO:0045618	negative regulation of transcription of nucleolar large rRNA by RNA polymerase I|negative regulation of gene expression, epigenetic|dosage compensation|nucleosome assembly|establishment of protein localization to chromatin|positive regulation of keratinocyte differentiation	GO:0046982|GO:0000977|GO:0031490	protein heterodimerization activity|RNA polymerase II transcription regulatory region sequence-specific DNA binding|chromatin DNA binding	GO:0005694|GO:0005634|GO:0001740|GO:0035098|GO:0000790	chromosome|nucleus|Barr body|ESC/E(Z) complex|NA
6087_0:003190	LOC100201253	100201253	protein_coding	1.14735	1179	1	2.07502	0.219683				XP_012561335.1	LOC100201253		100201253	transient receptor potential cation channel subfamily M member 1-like	GO:0055085|GO:0006811	transmembrane transport|ion transport	GO:0005216	ion channel activity	GO:0016020|GO:0016021	membrane|integral component of membrane
6087_0:002dcb	LOC100204390	100204390	protein_coding	1.14664	1180	2	1.84857	0.444701	spermatogenesis-associated protein 5-like(LOC100204390)	hmg03008:Ribosome biogenesis in eukaryotes,		XP_002166795.2	LOC100204390		100204390	spermatogenesis-associated protein 5-like			GO:0005524	ATP binding
	LOC105848901	105848901	lncRNA	1.14522	1182	1	2.29045	0
	LOC105844877	105844877	lncRNA	1.14522	1182	1	2.29045	0
	LOC105845860	105845860	lncRNA	1.14522	1182	1	2.29045	0
6087_0:0006b1	kazal5		protein_coding	1.1436	1184	2	1.73406	0.553133				NP_001267814.1	kazal5	B8Y8I8	100270692	Kazal-type serine protease inihibitor 5
6087_0:002664	LOC100205248	100205248	protein_coding	1.14325	1185	2	1.1694	1.11709				XP_012559124.1	LOC100205248		100205248	heat shock protein 83-like	GO:0006950	response to stress	GO:0005524|GO:0051082	ATP binding|unfolded protein binding
6087_0:0013ed	LOC100204143	100204143	protein_coding	1.1432	1186	1	2.2864	0	proliferating cell nuclear antigen-like(LOC100204143)	hmg03030:DNA replication,hmg03410:Base excision repair,hmg03420:Nucleotide excision repair,hmg03430:Mismatch repair,	IPR000730:Proliferating cell nuclear antigen, PCNA,IPR022648:Proliferating cell nuclear antigen, PCNA, N-terminal,IPR022649:Proliferating cell nuclear antigen, PCNA, C-terminal,	XP_002164838.1	PCNA	T2MHJ2	100204143	Proliferating cell nuclear antigen	GO:0006275|GO:0019985	regulation of DNA replication|translesion synthesis	GO:0030337|GO:0070182	DNA polymerase processivity factor activity|DNA polymerase binding	GO:0043596|GO:0005634|GO:0043626|GO:0005654	nuclear replication fork|nucleus|PCNA complex|nucleoplasm
6087_0:0046da	LOC100203396	100203396	protein_coding	1.14173	1187	1	2.28345	0	probable aconitate hydratase, mitochondrial(LOC100203396)	hmg00020:Citrate cycle (TCA cycle),hmg00630:Glyoxylate and dicarboxylate metabolism,hmg01100:Metabolic pathways,hmg01130:Biosynthesis of antibiotics,hmg01200:Carbon metabolism,hmg01210:2-Oxocarboxylic acid metabolism,hmg01230:Biosynthesis of amino acids,	IPR000573:Aconitase A/isopropylmalate dehydratase small subunit, swivel,IPR001030:Aconitase/3-isopropylmalate dehydratase large subunit, alpha/beta/alpha,IPR006248:Aconitase, mitochondrial-like,IPR015928:Aconitase/3-isopropylmalate dehydratase, swivel,IPR015931:Aconitase/3-isopropylmalate dehydratase large subunit, alpha/beta/alpha, subdomain 1/3,IPR015932:Aconitase/3-isopropylmalate dehydratase …	XP_004212430.2	ACO2	T2M779	100203396	Aconitate hydratase, mitochondrial	GO:0006099	tricarboxylic acid cycle	GO:0051539|GO:0003994|GO:0046872|GO:0016829|GO:0051536	4 iron, 4 sulfur cluster binding|aconitate hydratase activity|metal ion binding|lyase activity|iron-sulfur cluster binding	GO:0005739	mitochondrion
6087_0:00260e	LOC100198707	100198707	protein_coding	1.141	1188	1	1.9821	0.299896				XP_002165145.1	LOC100198707		100198707	uncharacterized protein LOC100198707	GO:0032259|GO:0008610	methylation|lipid biosynthetic process	GO:0008757	S-adenosylmethionine-dependent methyltransferase activity	GO:0005737|GO:0016021|GO:0016020	cytoplasm|integral component of membrane|membrane
	LOC100198502	100198502	lncRNA	1.1404	1189	2	1.26431	1.0165
6087_0:004547	LOC101237489	101237489	protein_coding	1.13993	1190	2	1.80277	0.477083				XP_004212258.2	LOC101237489		101237489	uncharacterized protein LOC101237489
6087_0:00239e	LOC100197430	100197430	protein_coding	1.13942	1191	1	2.0729	0.205934				XP_012558553.1	LOC100197430		100197430	flotillin-1-like	GO:0050821|GO:0001765	protein stabilization|membrane raft assembly	GO:0046982	protein heterodimerization activity	GO:0044291|GO:0005768|GO:0030864|GO:0005913|GO:0001931|GO:0016600|GO:0045121|GO:0016020|GO:0030027|GO:0016323	cell-cell contact zone|endosome|cortical actin cytoskeleton|NA|uropod|flotillin complex|membrane raft|membrane|lamellipodium|basolateral plasma membrane
6087_0:00058b	LOC100209576	100209576	protein_coding	1.13912	1192	2	1.34415	0.934094				XP_012562214.1	LOC100209576		100209576	WAS/WASL-interacting protein family member 1-like			GO:0003779	actin binding
6087_0:002998	LOC100211787	100211787	protein_coding	1.13864	1193	2	1.85585	0.42144				XP_012559747.1	LOC100211787		100211787	KH domain-containing, RNA-binding, signal transduction-associated protein 2-like			GO:0042802|GO:0003676	identical protein binding|nucleic acid binding
6087_0:00399e	LOC100209597	100209597	protein_coding	1.13848	1194	1	1.89901	0.377951	serine/arginine-rich splicing factor 2-like(LOC100209597)	hmg03040:Spliceosome,		XP_002169071.2	LOC100209597		100209597	serine/arginine-rich splicing factor 2-like			GO:0003676	nucleic acid binding
6087_0:002203	LOC101236951	101236951	protein_coding	1.1383	1195	1	2.2766	0				XP_004208614.1	LOC101236951		101236951	uncharacterized protein LOC101236951	GO:0016310|GO:0048015	phosphorylation|phosphatidylinositol-mediated signaling	GO:0005488|GO:0016740|GO:0016301	binding|transferase activity|kinase activity	GO:0005622	intracellular anatomical structure
6087_0:00193f	LOC100203178	100203178	protein_coding	1.13789	1196	2	1.56824	0.707536	serine/arginine-rich splicing factor 7-like(LOC100203178)	hmg04141:Protein processing in endoplasmic reticulum,		XP_002167910.1	LOC100203178		100203178	hsp70-binding protein 1-like isoform X1			GO:0005488	binding
6087_0:001b63	LOC100201339	100201339	protein_coding	1.13776	1197	2	1.74063	0.5349				XP_002165610.2	LOC100201339		100201339	probable serine/threonine-protein kinase DDB_G0268642			GO:0046872|GO:0003676	metal ion binding|nucleic acid binding
6087_0:000643	LOC100208612	100208612	protein_coding	1.13637	1198	1	2.27273	0				XP_002156353.1	LOC100208612		100208612	uncharacterized protein LOC100208612 isoform X1
6087_0:002ba2	LOC101235803	101235803	protein_coding	1.13613	1199	1	2.27225	0				XP_012560143.1	LOC101235803		101235803	uncharacterized protein LOC101235803			GO:0003676|GO:0046983	nucleic acid binding|protein dimerization activity
6087_0:001ca4	LOC100197891	100197891	protein_coding	1.13607	1200	1	1.96023	0.311907				XP_012557103.1	LOC100197891		100197891	uncharacterized protein LOC100197891 isoform X1	GO:0032923	organic phosphonate biosynthetic process	GO:0030976|GO:0033980|GO:0003824|GO:0000287	thiamine pyrophosphate binding|phosphonopyruvate decarboxylase activity|catalytic activity|magnesium ion binding
6087_0:001960	LOC100202546	100202546	protein_coding	1.13413	1201	1	2.26826	0				XP_002164666.1	LOC100202546		100202546	uncharacterized protein YMR315W-like	GO:0055114	NA	GO:0016491	oxidoreductase activity
6087_0:004581	LOC100206706	100206706	protein_coding	1.13277	1202	1	1.9678	0.29773				XP_012565157.1	LOC100206706		100206706	protein PF14_0175-like	GO:0030500|GO:0045668|GO:0032872	regulation of bone mineralization|negative regulation of osteoblast differentiation|regulation of stress-activated MAPK cascade	GO:0043130|GO:0051019|GO:0008270	ubiquitin binding|mitogen-activated protein kinase binding|zinc ion binding	GO:0005829|GO:0016604|GO:0005739|GO:0000407|GO:0005770|GO:0005654|GO:0043231|GO:0005776	cytosol|nuclear body|mitochondrion|phagophore assembly site|late endosome|nucleoplasm|intracellular membrane-bounded organelle|autophagosome
6087_0:0008a3	LOC100198581	100198581	protein_coding	1.13157	1203	1	2.26314	0	small nuclear ribonucleoprotein F-like(LOC100198581)	hmg03040:Spliceosome,	IPR001163:Ribonucleoprotein LSM domain,IPR010920:Like-Sm (LSM) domain,IPR016487:Small nuclear ribonucleoprotein SmF,	XP_002166685.1	SNRPF	T2MEM8	100198581	Small nuclear ribonucleoprotein F	GO:0000387|GO:0006397	spliceosomal snRNP assembly|mRNA processing			GO:0005681|GO:0071013|GO:0005685|GO:0005732|GO:0005634	spliceosomal complex|catalytic step 2 spliceosome|U1 snRNP|sno(s)RNA-containing ribonucleoprotein complex|nucleus
6087_0:00244f	LOC100212329	100212329	protein_coding	1.13114	1204	1	2.26228	0				XP_002157152.2	LOC100212329		100212329	uncharacterized protein LOC100212329	GO:0006338|GO:0006281	chromatin remodeling|DNA repair			GO:0005634|GO:0031011	nucleus|Ino80 complex
6087_0:000a90	LOC101237113	101237113	protein_coding	1.13092	1205	2	0.537894	1.72395				XP_004206349.1	LOC101237113		101237113	sorting nexin-4-like	GO:1903595|GO:0032456	positive regulation of histamine secretion by mast cell|endocytic recycling	GO:1990460|GO:1990459|GO:0035091|GO:0005158	leptin receptor binding|transferrin receptor binding|phosphatidylinositol binding|insulin receptor binding	GO:0031201|GO:0016020|GO:0031901|GO:0005868|GO:0005737	SNARE complex|membrane|early endosome membrane|cytoplasmic dynein complex|cytoplasm
6087_0:000d43	LOC100199350	100199350	protein_coding	1.13089	1206	1	2.09531	0.166465				XP_012553974.1	LOC100199350		100199350	uncharacterized protein LOC100199350					GO:0016021	integral component of membrane
6087_0:000dcd	LOC100201613	100201613	protein_coding	1.13072	1207	2	1.7107	0.550747				XP_002162984.1	LOC100201613		100201613	protein phosphatase 1 regulatory subunit 12A-like
6087_0:002461	LOC100212013	100212013	protein_coding	1.1289	1208	1	2.16242	0.0953764	putative pre-mRNA-splicing factor ATP-dependent RNA helicase PRP1(LOC100212013)	hmg03040:Spliceosome,		XP_002163295.3	LOC100212013		100212013	putative pre-mRNA-splicing factor ATP-dependent RNA helicase PRP1			GO:0000166|GO:0005524|GO:0004386|GO:0003676|GO:0016787|GO:0008026|GO:0004004	nucleotide binding|ATP binding|helicase activity|nucleic acid binding|hydrolase activity|NA	GO:0005737|GO:0005681	cytoplasm|spliceosomal complex
	LOC101240851	101240851	lncRNA	1.12634	1209	1	2.25267	0
6087_0:003868	LOC100203524	100203524	protein_coding	1.12279	1210	1	2.12304	0.122542	regulator of nonsense transcripts 1(LOC100203524)	hmg03013:RNA transport,hmg03015:mRNA surveillance pathway,		XP_012562685.1	LOC100203524		100203524	regulator of nonsense transcripts 1	GO:0000956|GO:0000184	nuclear-transcribed mRNA catabolic process|nuclear-transcribed mRNA catabolic process, nonsense-mediated decay	GO:0004386|GO:0016787|GO:0008270|GO:0005524	helicase activity|hydrolase activity|zinc ion binding|ATP binding	GO:0005737|GO:0035145|GO:0005634	cytoplasm|exon-exon junction complex|nucleus
6087_0:002a98	LOC100200458	100200458	protein_coding	1.12279	1211	1	2.24558	0	mitochondrial import inner membrane translocase subunit Tim21-like(LOC100200458)		IPR013261:Mitochondrial import inner membrane translocase subunit Tim21,	XP_002167000.1	C18orf55	T2M6Q3	100200458	TIM21-like protein, mitochondrial	GO:0030150|GO:0033617|GO:0032981	protein import into mitochondrial matrix|mitochondrial cytochrome c oxidase assembly|mitochondrial respiratory chain complex I assembly			GO:0016020|GO:0016021|GO:0005744	membrane|integral component of membrane|TIM23 mitochondrial import inner membrane translocase complex
6087_0:0032f3	LOC100204981	100204981	protein_coding	1.12265	1212	1	1.97281	0.272498	proliferation-associated protein 2G4-like(LOC100204981)		IPR000994:Peptidase M24, structural domain,IPR004545:Proliferation-associated protein 1,IPR011991:Winged helix-turn-helix DNA-binding domain,	XP_002163189.2	PA2G4	T2M2R0	100204981	Proliferation-associated protein 2G4					GO:0005737|GO:0005634	cytoplasm|nucleus
6087_0:001560	LOC101239814	101239814	protein_coding	1.12083	1213	2	1.24307	0.998585				XP_004207388.1	LOC101239814		101239814	ragulator complex protein LAMTOR1-like	GO:0043410|GO:0032439|GO:0007040|GO:0001919|GO:0032008|GO:0071230	positive regulation of MAPK cascade|NA|lysosome organization|regulation of receptor recycling|positive regulation of TOR signaling|cellular response to amino acid stimulus			GO:0045121|GO:0031902|GO:0071986	membrane raft|late endosome membrane|Ragulator complex
	LOC105843504	105843504	lncRNA	1.12082	1214	1	2.24164	0
6087_0:003f8a	LOC105848472	105848472	protein_coding	1.12036	1215	2	1.41997	0.820754				XP_012564051.1	LOC105848472		105848472	protein DD3-3-like					GO:0016021	integral component of membrane
6087_0:001678	LOC100205562	100205562	protein_coding	1.12031	1216	1	2.24061	0	protein transport protein Sec61 subunit beta-like(LOC100205562)	hmg03060:Protein export,hmg04141:Protein processing in endoplasmic reticulum,hmg04145:Phagosome,		XP_002154626.1	LOC100205562		100205562	protein transport protein Sec61 subunit beta-like	GO:0006616|GO:0031204	SRP-dependent cotranslational protein targeting to membrane, translocation|posttranslational protein targeting to membrane, translocation	GO:0005086	NA	GO:0031205|GO:0005784|GO:0016021|GO:0016020|GO:0005783	endoplasmic reticulum Sec complex|Sec61 translocon complex|integral component of membrane|membrane|endoplasmic reticulum
	LOC105846943	105846943	lncRNA	1.11706	1217	1	2.23413	0
6087_0:000047	LOC105844425	105844425	protein_coding	1.11671	1218	1	2.23343	0				XP_012556514.1	LOC105844425		105844425	uncharacterized protein LOC105844425	GO:0009615	response to virus			GO:0005634	nucleus
6087_0:0001e3	LOC100211676	100211676	protein_coding	1.11649	1219	2	1.59598	0.637007	NADH dehydrogenase [ubiquinone] 1 alpha subcomplex subunit 8-like(LOC100211676)	hmg00190:Oxidative phosphorylation,hmg01100:Metabolic pathways,		XP_002157365.1	LOC100211676		100211676	NADH dehydrogenase	GO:0006120|GO:0055114|GO:0032981	mitochondrial electron transport, NADH to ubiquinone|NA|mitochondrial respiratory chain complex I assembly			GO:0005739|GO:0070469|GO:0005743|GO:0016020	mitochondrion|respirasome|mitochondrial inner membrane|membrane
6087_0:003d9d	LOC100213335	100213335	protein_coding	1.11641	1220	1	2.23283	0				XP_002164365.3	LOC100213335		100213335	peptidyl-prolyl cis-trans isomerase FKBP14-like	GO:0000413	protein peptidyl-prolyl isomerization	GO:0016853|GO:0005509	isomerase activity|calcium ion binding
6087_0:0003ee	LOC100204650	100204650	protein_coding	1.11641	1221	1	2.23282	0				XP_002168712.1	LOC100204650		100204650	protein PRY1-like					GO:0005576	extracellular region
6087_0:00093c	LOC100204984	100204984	protein_coding	1.11618	1222	1	1.89691	0.335446				XP_012566918.1	LOC100204984		100204984	upstream stimulatory factor 2-like	GO:0000432|GO:0055088	positive regulation of transcription from RNA polymerase II promoter by glucose|lipid homeostasis	GO:0046983|GO:0003705|GO:0043565|GO:0043425|GO:0042803|GO:0046982	protein dimerization activity|NA|sequence-specific DNA binding|bHLH transcription factor binding|protein homodimerization activity|protein heterodimerization activity	GO:0005654|GO:0005634	nucleoplasm|nucleus
6087_0:00081b	LOC100207790	100207790	protein_coding	1.11462	1223	1	2.07245	0.156793				XP_002156628.1	LOC100207790		100207790	mitochondrial-processing peptidase subunit beta-like	GO:0006122|GO:0006627|GO:0006508|GO:0009060	mitochondrial electron transport, ubiquinol to cytochrome c|protein processing involved in protein targeting to mitochondrion|proteolysis|aerobic respiration	GO:0008270|GO:0003824|GO:0004222|GO:0046872	zinc ion binding|catalytic activity|metalloendopeptidase activity|metal ion binding	GO:0017087|GO:0005743|GO:0005739	mitochondrial processing peptidase complex|mitochondrial inner membrane|mitochondrion
6087_0:001ab2	LOC100200187	100200187	protein_coding	1.11308	1224	1	2.01314	0.213014				XP_012556730.1	LOC100200187		100200187	uncharacterized protein LOC100200187
6087_0:0038d7	LOC100213362	100213362	protein_coding	1.11272	1225	1	2.16515	0.0602931				XP_012562781.1	LOC100213362		100213362	myoferlin					GO:0016021|GO:0016020	integral component of membrane|membrane
6087_0:000fa7	LOC100211329	100211329	protein_coding	1.11227	1226	1	2.22454	0				XP_002165864.3	LOC100211329		100211329	SH3 domain-containing kinase-binding protein 1-like					GO:0005737|GO:0005911	cytoplasm|cell-cell junction
6087_0:001ef2	LOC100204867	100204867	protein_coding	1.11224	1227	2	1.13775	1.08674	clathrin light chain B-like(LOC100204867)		IPR000996:Clathrin light chain,	XP_002163714.1	CLTB	T2MH58	100204867	Clathrin light chain	GO:0072583	clathrin-dependent endocytosis	GO:0005198|GO:0032050	structural molecule activity|clathrin heavy chain binding	GO:0016020|GO:0030659|GO:0030132|GO:0005905|GO:0030130|GO:0030125	membrane|cytoplasmic vesicle membrane|clathrin coat of coated pit|clathrin-coated pit|clathrin coat of trans-Golgi network vesicle|clathrin vesicle coat
	LOC105849704	105849704	lncRNA	1.11115	1228	1	2.2223	0
6087_0:000b4f	LOC105843155	105843155	protein_coding	1.11102	1229	1	1.96202	0.260029				XP_012553576.1	LOC105843155		105843155	zinc finger protein 713-like			GO:0003676	nucleic acid binding
6087_0:000b02	LOC100215322	100215322	protein_coding	1.11085	1230	2	1.52718	0.69453				XP_002163089.2	LOC100215322		100215322	prefoldin subunit 2-like			GO:0051082|GO:0044183	unfolded protein binding|protein folding chaperone	GO:0016272|GO:0005737	prefoldin complex|cytoplasm
6087_0:00230b	LOC100214026	100214026	protein_coding	1.10846	1231	1	2.00612	0.210799				XP_012558431.1	LOC100214026		100214026	dystonin-like			GO:0003779|GO:0005509|GO:0008017	actin binding|calcium ion binding|microtubule binding	GO:0005856	cytoskeleton
	LOC105847985	105847985	lncRNA	1.10682	1232	1	2.21363	0
6087_0:0040f4	LOC105848673	105848673	protein_coding	1.10479	1233	1	2.20958	0	lens fiber membrane intrinsic protein-like(LOC105848673)		IPR004031:PMP-22/EMP/MP20/Claudin,	XP_012564315.1	CLDNL10	A0A0H5FPR5	105848673	Claudin-like 10					GO:0016021	integral component of membrane
6087_0:002e2a	LOC100212635	100212635	protein_coding	1.10166	1234	1	2.20332	0				XP_002164220.2	LOC100212635		100212635	uncharacterized protein LOC100212635			GO:0003824	catalytic activity
	LOC105849834	105849834	lncRNA	1.10033	1235	2	1.68166	0.518996
6087_0:0005ad	LOC100200042	100200042	protein_coding	1.10002	1236	1	1.97147	0.228567	serine/arginine-rich splicing factor 2-like(LOC100200042)	hmg03040:Spliceosome,	IPR000504:RNA recognition motif domain,IPR003954:RNA recognition motif domain, eukaryote,IPR012677:Nucleotide-binding, alpha-beta plait,	XP_002161458.1	SRSF2	T2MDQ6	100200042	Serine/arginine-rich splicing factor 2			GO:0003676	nucleic acid binding	GO:0005634	nucleus
6087_0:002523	LOC105845545	105845545	protein_coding	1.09949	1237	1	0.379976	1.81901				XP_012558874.1	LOC105845545		105845545	uncharacterized protein LOC105845545			GO:0004518	nuclease activity
6087_0:003a2c	LOC100215134	100215134	protein_coding	1.09912	1238	1	2.19824	0				XP_012563033.1	LOC100215134		100215134	leucine-rich repeat flightless-interacting protein 2-like
6087_0:000c0d	LOC100203821	100203821	protein_coding	1.09845	1239	1	1.93982	0.25708				XP_002156703.3	LOC100203821		100203821	secretory carrier-associated membrane protein 2-like					GO:0016020|GO:0016021	membrane|integral component of membrane
6087_0:004500	LOC100214908	100214908	protein_coding	1.09794	1240	1	2.19587	0				XP_002164800.1	LOC100214908		100214908	protein SpAN-like	GO:0006508	proteolysis	GO:0008270|GO:0008237|GO:0004222	zinc ion binding|metallopeptidase activity|metalloendopeptidase activity
6087_0:00394d	LOC100207137	100207137	protein_coding	1.09631	1241	1	2.19262	0				XP_002168661.1	LOC100207137		100207137	universal stress protein A-like protein	GO:0006950	response to stress
6087_0:00148f	LOC105843986	105843986	protein_coding	1.09605	1242	1	2.07828	0.113812				XP_012555506.1	LOC105843986		105843986	pollen-specific leucine-rich repeat extensin-like protein 1
	LOC105844783	105844783	lncRNA	1.09353	1243.5	1	2.18707	0
	LOC105844849	105844849	lncRNA	1.09353	1243.5	1	2.18707	0
6087_0:003316	LOC100203932	100203932	protein_coding	1.09264	1245	2	1.75586	0.429423	glucosidase 2 subunit beta-like(LOC100203932)	hmg04141:Protein processing in endoplasmic reticulum,		XP_002167401.3	LOC100203932		100203932	glucosidase 2 subunit beta-like			GO:0005509	calcium ion binding
	LOC105844738	105844738	lncRNA	1.09227	1246	2	1.21158	0.972967
6087_0:004cf4	LOC105850581	105850581	protein_coding	1.09105	1247	1	2.1821	0				XP_012566492.1	LOC105850581		105850581	uncharacterized protein LOC105850581
6087_0:003110	LOC105846746	105846746	protein_coding	1.09073	1248.5	1	2.18146	0				XP_012561233.1	LOC105846746		105846746	protein TSSC4-like
6087_0:004a3f	LOC100200109	100200109	protein_coding	1.09073	1248.5	1	2.18146	0				XP_002170192.3	LOC100200109		100200109	protein argonaute-1-like	GO:0031047	gene silencing by RNA	GO:0003676	nucleic acid binding
6087_0:0025a8	LOC100213679	100213679	protein_coding	1.08919	1250.5	1	2.17837	0	mRNA turnover protein 4 homolog(LOC100213679)		IPR001790:Ribosomal protein L10/acidic P0,	XP_002154208.1	MRTO4	T2M3M9	100213679	Ribosome assembly factor mrt4	GO:0042273|GO:0000027|GO:0000956	ribosomal large subunit biogenesis|ribosomal large subunit assembly|nuclear-transcribed mRNA catabolic process			GO:0030687|GO:0005730|GO:0005737|GO:0005654|GO:0005634|GO:0005622	preribosome, large subunit precursor|nucleolus|cytoplasm|nucleoplasm|nucleus|intracellular anatomical structure
6087_0:0039d5	LOC100214875	100214875	protein_coding	1.08919	1250.5	1	2.17837	0	translocon-associated protein subunit gamma-like(LOC100214875)	hmg04141:Protein processing in endoplasmic reticulum,	IPR009779:Translocon-associated, gamma subunit,	XP_002154740.1	SSR3	T2M2Y0	100214875	Translocon-associated protein subunit gamma	GO:0006614	SRP-dependent cotranslational protein targeting to membrane			GO:0016021|GO:0016020|GO:0005622	integral component of membrane|membrane|intracellular anatomical structure
6087_0:001602	LOC100212538	100212538	protein_coding	1.08822	1252	1	2.06702	0.109417	mRNA cap guanine-N7 methyltransferase-like(LOC100212538)	hmg03015:mRNA surveillance pathway,		XP_004207444.1	LOC100212538		100212538	LOW QUALITY PROTEIN: mRNA cap guanine-N7 methyltransferase-like	GO:0032259|GO:0106005|GO:0006397|GO:0006370|GO:0036265	methylation|RNA 5'-cap (guanine-N7)-methylation|mRNA processing|7-methylguanosine mRNA capping|RNA (guanine-N7)-methylation	GO:0004482|GO:0016740	mRNA (guanine-N7-)-methyltransferase activity|transferase activity	GO:0005634|GO:0005845	nucleus|mRNA cap binding complex
6087_0:0007a7	LOC100214508	100214508	protein_coding	1.08687	1253	1	1.85547	0.31828	MAP/microtubule affinity-regulating kinase 3(LOC100214508)		IPR000719:Protein kinase, catalytic domain,IPR001772:Kinase associated domain 1 (KA1),IPR008271:Serine/threonine-protein kinase, active site,IPR009060:UBA-like,IPR011009:Protein kinase-like domain,IPR015940:Ubiquitin-associated/translation elongation factor EF1B, N-terminal, eukaryote,IPR017441:Protein kinase, ATP binding site,	XP_012566021.1	MARK1	T2M438	100214508	Non-specific serine/threonine protein kinase	GO:0006468|GO:0016310|GO:0000226	protein phosphorylation|phosphorylation|microtubule cytoskeleton organization	GO:0005524|GO:0016301|GO:0000166|GO:0016740	ATP binding|kinase activity|nucleotide binding|transferase activity
6087_0:000f2b	LOC105843491	105843491	protein_coding	1.08618	1254	1	2.10802	0.0643494				XP_012554384.1	LOC105843491		105843491	probable GPI-anchored adhesin-like protein PGA55
6087_0:003c04	LOC100200738	100200738	protein_coding	1.0859	1255	1	1.93511	0.236681				XP_012563410.1	LOC100200738		100200738	zinc metalloproteinase nas-4-like	GO:0006508	proteolysis	GO:0008237|GO:0004222|GO:0008270	metallopeptidase activity|metalloendopeptidase activity|zinc ion binding
6087_0:0009bc	LOC100214721	100214721	protein_coding	1.08371	1256	1	1.87042	0.297001				XP_002163976.1	LOC100214721		100214721	zinc finger protein 598-like			GO:0003676|GO:0008270	nucleic acid binding|zinc ion binding
6087_0:0000cd	LOC105850171	105850171	protein_coding	1.08351	1257	2	1.71309	0.45393				XP_012566127.1	LOC105850171		105850171	uncharacterized protein LOC105850171					GO:0016021	integral component of membrane
6087_0:00265b	LOC100205950	100205950	protein_coding	1.08324	1258	2	1.54857	0.617907	NADH dehydrogenase [ubiquinone] 1 alpha subcomplex subunit 5-like(LOC100205950)	hmg00190:Oxidative phosphorylation,hmg01100:Metabolic pathways,	IPR006806:ETC complex I subunit,	XP_002157738.1	NDUFA5	T2MCJ8	100205950	NADH dehydrogenase	GO:0022904	respiratory electron transport chain	GO:0016651	oxidoreductase activity, acting on NAD(P)H	GO:0005743	mitochondrial inner membrane
6087_0:003e46	LOC100205498	100205498	protein_coding	1.08258	1259	1	2.16516	0	vascular endothelial growth factor C-like(LOC100205498)		IPR000072:Platelet-derived growth factor (PDGF),IPR004153:CXCXC repeat,	XP_002162218.1	LOC100205498	C0LT60	100205498	VEGF	GO:0010469	regulation of signaling receptor activity	GO:0008083	growth factor activity	GO:0016020	membrane
6087_0:001873	LOC105844323	105844323	protein_coding	1.08186	1260	1	2.16372	0				XP_012556280.1	LOC105844323		105844323	uncharacterized protein LOC105844323
6087_0:0005c5	LOC105847571	105847571	protein_coding	1.08136	1261	2	0.832786	1.32994				XP_012562680.1	LOC105847571		105847571	uncharacterized protein LOC105847571
6087_0:0029f9	LOC100197964	100197964	protein_coding	1.08122	1262	1	2.16243	0				XP_012559829.1	LOC100197964		100197964	ubiquitin-associated protein 2-like	GO:0010628	positive regulation of gene expression			GO:0005737|GO:0005634	cytoplasm|nucleus
	LOC105844120	105844120	lncRNA	1.08112	1263	1	2.16224	0
6087_0:002532	LOC100198330	100198330	protein_coding	1.08042	1264	1	1.88817	0.272662	H/ACA ribonucleoprotein complex subunit 4-like(LOC100198330)	hmg03008:Ribosome biogenesis in eukaryotes,	IPR002478:Pseudouridine synthase/archaeosine transglycosylase,IPR002501:Pseudouridine synthase II,IPR004521:Uncharacterised domain CHP00451,IPR004802:tRNA pseudouridine synthase B family,IPR012960:Dyskerin-like,IPR015947:PUA-like domain,IPR020103:Pseudouridine synthase, catalytic domain,	XP_002154610.2	DKC1	T2MIB3	100198330	H/ACA ribonucleoprotein complex subunit 4	GO:0000495|GO:0031118|GO:0031120|GO:0001522|GO:1990481	box H/ACA RNA 3'-end processing|rRNA pseudouridine synthesis|snRNA pseudouridine synthesis|pseudouridine synthesis|mRNA pseudouridine synthesis			GO:0031429|GO:0016021	box H/ACA snoRNP complex|integral component of membrane
[truncated: 4,836 more rows]
