# Supplementary material for: The Aquatic Invertebrate Hydra vulgaris Releases Molecular Messages Through Extracellular Vesicles
Source: Front Cell Dev Biol. 2021 Dec 20;9:788117. doi: 10.3389/fcell.2021.788117 (PMC8721104; doi:10.3389/fcell.2021.788117)
Supplement: Supplementary file 3 [file DataSheet2.xlsx]

## Sheet: 2975 transcripts
geneid	gene	Pfam	Pfam annot	SP annot	SP eval	nr annot	nr eval	Swissprot	Validated	Average TPM	Rank	Detectable in N samples	RNA1 (TPM)	RNA2 (TPM)	cell cluster	cell lineage	cell type	anatomical group
t30823aep	t30823aep|TAR1_KLULA					PREDICTED: uncharacterized protein LOC107178872 [Citrus sinensis]		TAR1_KLULA	FALSE	24710.4	6	2	42171.8	7249.05	ecEp_basal_disk,ecEp_battery_cell2(mp),ecEp_head,ecEp_stem_cell	ectoderm	ecEp_basal_disk,ecEp_battery_cell,ecEp_head,ecEp_stem_cell	foot,head,body
t1568aep	t1568aep|BCAT1_SHEEP	PF01063.19	Aminotran_4	Q9GKM4|BCAT1_SHEEP Branched-chain-amino-acid aminotransferase, cytosolic OS=Ovis aries (Sheep)	6.93e-47	PREDICTED: branched-chain-amino-acid aminotransferase, cytosolic-like [Hydra vulgaris]	1.02e-95	BCAT1_SHEEP	FALSE	673.319	23	2	773.473	573.165	i_nb1,i_nb2,i_nb3,i_SC,i_stem_cell/progenitor	interstitial	i_nb,i_SC,i_stem_cell_progenitor	body
t8317aep	t8317aep								FALSE	399.149	27	2	424.756	373.543	ecEp_basal_disk,ecEp_battery_cell1(mp),ecEp_battery_cell2(mp),ecEp_head,ecEp_stem_cell	ectoderm	ecEp_basal_disk,ecEp_battery_cell,ecEp_head,ecEp_stem_cell	foot,head,body
t273aep	t273aep	PF17830.1	STI1			PREDICTED: uncharacterized protein LOC105847469 [Hydra vulgaris]	4.21e-157		FALSE	233.122	30	2	207.463	258.781	enEp_tent-nem(pd),enEp_tentacle,i_male_germline	endoderm,germ line	enEp_tent-nem,enEp_tentacle,i_male_germline	head,body
t1932aep	t1932aep|4EBP2_MOUSE	PF05456.11	eIF_4EBP	P70445|4EBP2_MOUSE Eukaryotic translation initiation factor 4E-binding protein 2 {ECO:0000250|UniProtKB:Q13542} OS=Mus musculus (Mouse)	2.83e-21	PREDICTED: eukaryotic translation initiation factor 4E-binding protein 3-like [Hydra vulgaris]	7.93e-67	4EBP2_MOUSE	FALSE	233.094	31	2	223.579	242.608	i_female_germline1,i_female_germline2_nurse,i_SC,i_stem_cell/progenitor	germ line,interstitial	i_female_germline,i_SC,i_stem_cell_progenitor	body
t35773aep	t35773aep|FRIS_LYMST	PF00210.24	Ferritin	P42577|FRIS_LYMST Soma ferritin OS=Lymnaea stagnalis (Great pond snail) (Helix stagnalis)	2.13e-69	PREDICTED: soma ferritin-like [Hydra vulgaris]	4.13e-114	FRIS_LYMST	FALSE	64.4432	37	2	101.702	27.1844	ecEp_battery_cell1(mp),ecEp_battery_cell2(mp),ecEp_head,ecEp_stem_cell,enEp_tent-nem(pd),i_nematocyte,i_neuron_ec1,i_neuron_ec4	ectoderm,endoderm,interstitial	ecEp_battery_cell,ecEp_head,ecEp_stem_cell,enEp_tent-nem,i_nematocyte,i_neuron_ec	head,body,nerve net
t8678aep	t8678aep					Dickkopf 1/2/4-A protein [Hydra vulgaris]	2.73e-41		FALSE	50.3789	40	2	45.0691	55.6887	i_zymogen_gland_cell	interstitial	i_gland_cell	body
t29320aep	t29320aep								FALSE	42.4791	43	2	30.5737	54.3845	ecEp_battery_cell1(mp),ecEp_battery_cell2(mp),ecEp_head,ecEp_stem_cell	ectoderm	ecEp_battery_cell,ecEp_head,ecEp_stem_cell	head,body
t11116aep	t11116aep|ACT_HYDVU					PREDICTED: actin, non-muscle 6.2 [Hydra vulgaris] >gi|113296|sp|P17126.1|ACT_HYDVU RecName: Full=Actin, non-muscle 6.2 >gi|159254|gb|AAA29205.1| actin [Hydra vulgaris]		ACT_HYDVU	FALSE	36.3873	46	2	60.9743	11.8004	ecEp_battery_cell2(mp)	ectoderm	ecEp_battery_cell	head
t15818aep	t15818aep					PREDICTED: neuroblast differentiation-associated protein AHNAK [Hydra vulgaris]	0		FALSE	34.5238	50	2	65.5827	3.46498	ecEp_basal_disk,ecEp_battery_cell1(mp),ecEp_battery_cell2(mp),ecEp_head,ecEp_stem_cell,enEp_tent-nem(pd)	ectoderm,endoderm	ecEp_basal_disk,ecEp_battery_cell,ecEp_head,ecEp_stem_cell,enEp_tent-nem	foot,head,body
t24379aep	t24379aep								FALSE	29.3091	53	2	26.1987	32.4195	ecEp_head	ectoderm	ecEp_head	head
t37818aep	t37818aep|EF1A_HYDVU	PF00009.27;PF03143.17;PF03144.25	GTP_EFTU;GTP_EFTU_D3;GTP_EFTU_D2	P51554|EF1A_HYDVU Elongation factor 1-alpha OS=Hydra vulgaris (Hydra) (Hydra attenuata)	0	PREDICTED: elongation factor 1-alpha [Hydra vulgaris] >gi|828190411|ref|XP_012553476.1| PREDICTED: elongation factor 1-alpha [Hydra vulgaris]	0	EF1A_HYDVU	FALSE	21.5488	56	2	39.0609	4.03661	i_female_germline1,i_nb1,i_SC,i_stem_cell/progenitor	germ line,interstitial	i_female_germline,i_nb,i_SC,i_stem_cell_progenitor	body
t29983aep	t29983aep|H2B1_TIGCA	PF00125.24	Histone	P35068|H2B1_TIGCA Histone H2B.1/H2B.2 OS=Tigriopus californicus (Marine copepod)	4.33e-53	PREDICTED: histone H2B, gonadal-like [Hydra vulgaris] >gi|828225457|ref|XP_012563328.1| PREDICTED: histone H2B, gonadal-like [Hydra vulgaris]	1.75e-61	H2B1_TIGCA	FALSE	20.1977	58	2	38.0899	2.30548	i_female_germline1,i_male_germline,i_nb1,i_nb2,i_neuron/gland_cell_progenitor,i_neuron_progenitor,i_stem_cell/progenitor	germ line,interstitial	i_female_germline,i_male_germline,i_nb,i_neuron_progenitor,i_stem_cell_progenitor	body
t33113aep	t33113aep					PREDICTED: myosin heavy chain, skeletal muscle-like isoform X2 [Hydra vulgaris]	0		FALSE	20.112	59	2	16.6843	23.5397	ecEp_battery_cell1(mp),ecEp_battery_cell2(mp),enEp_SC1,enEp_tent-nem(pd),enEp_tentacle,i_female_germline2_nurse	ectoderm,endoderm,germ line	ecEp_battery_cell,enEp_SC1,enEp_tent-nem,enEp_tentacle,i_female_germline	head,body
t31074aep	t31074aep								FALSE	13.7976	62	2	20.1673	7.42787	enEp-nb(pd),enEp-nem(pd),enEp_foot,enEp_head,enEp_SC1,enEp_stem_cell	endoderm	enEp-nb,enEp-nem,enEp_foot,enEp_head,enEp_SC1,enEp_stem_cell	body,head,foot
t19167aep	t19167aep|RL37_EMENI	PF01907.19	Ribosomal_L37e	Q9C0T1|RL37_EMENI 60S ribosomal protein L37 OS=Emericella nidulans (strain FGSC A4 / ATCC 38163 / CBS 112194 / M139) (Aspergillus nidulans)	3.34e-28	PREDICTED: 60S ribosomal protein L37-A-like [Hydra vulgaris]	1.15e-36	RL37_EMENI	FALSE	13.7528	63	2	20.7344	6.77118	i_nb1,i_nb2,i_neuron/gland_cell_progenitor,i_neuron_progenitor,i_stem_cell/progenitor	interstitial	i_nb,i_neuron_progenitor,i_stem_cell_progenitor	body
t11164aep	t11164aep|UBIQP_CRIGR	PF00240.23;PF11976.8;PF14560.6;PF18396.1;PF13881.6;PF18037.1;PF10302.9	ubiquitin;Rad60-SLD;Ubiquitin_2;TBK1_ULD;Rad60-SLD_2;Ubiquitin_5;DUF2407	P62976|UBIQP_CRIGR Polyubiquitin OS=Cricetulus griseus (Chinese hamster) (Cricetulus barabensis griseus)	0	PREDICTED: polyubiquitin-B [Hydra vulgaris] >gi|449665888|ref|XP_002158413.2| PREDICTED: polyubiquitin-B [Hydra vulgaris]	0	UBIQP_CRIGR	FALSE	13.5855	65	2	23.971	3.20009	ecEp_basal_disk,ecEp_battery_cell1(mp),ecEp_battery_cell2(mp),i_female_germline2_nurse,i_neuron_en3	ectoderm,germ line,endoderm	ecEp_basal_disk,ecEp_battery_cell,i_female_germline,i_neuron_en	foot,head,body,nerve net
t22880aep	t22880aep								FALSE	13.4266	66	2	13.5748	13.2784	enEp_tent-nem(pd),enEp_tentacle,i_neuron_ec3,i_neuron_ec4,i_neuron_en1	endoderm,ectoderm	enEp_tent-nem,enEp_tentacle,i_neuron_ec,i_neuron_en	head,nerve net
t33911aep	t33911aep|RL36_IXOSC	PF01158.18	Ribosomal_L36e	Q4PM12|RL36_IXOSC 60S ribosomal protein L36 OS=Ixodes scapularis (Black-legged tick) (Deer tick)	3.15e-29	PREDICTED: 60S ribosomal protein L36-like [Hydra vulgaris] >gi|449669251|ref|XP_004206976.1| PREDICTED: 60S ribosomal protein L36-like [Hydra vulgaris] >gi|828200202|ref|XP_012554852.1| PREDICTED: 60S ribosomal protein L36-like [Hydra vulgaris]	8.9e-49	RL36_IXOSC	FALSE	13.0678	67	2	22.9948	3.14085	i_nb1,i_nb2,i_neuron/gland_cell_progenitor,i_neuron_progenitor,i_SC,i_stem_cell/progenitor	interstitial	i_nb,i_neuron_progenitor,i_SC,i_stem_cell_progenitor	body
t31847aep	t31847aep|RS2_ICTPU	PF00333.20;PF03719.15	Ribosomal_S5;Ribosomal_S5_C	Q90YS3|RS2_ICTPU 40S ribosomal protein S2 OS=Ictalurus punctatus (Channel catfish) (Silurus punctatus)	1.53e-135	PREDICTED: 40S ribosomal protein S2 [Strongylocentrotus purpuratus]	6.88e-137	RS2_ICTPU	FALSE	12.1199	70	2	19.9849	4.25492	i_nb1,i_nb2,i_neuron/gland_cell_progenitor,i_neuron_progenitor,i_stem_cell/progenitor	interstitial	i_nb,i_neuron_progenitor,i_stem_cell_progenitor	body
t31253aep	t31253aep|RL40_DROME	PF00240.23;PF01020.17;PF11976.8	ubiquitin;Ribosomal_L40e;Rad60-SLD	P18101|RL40_DROME Ubiquitin-60S ribosomal protein L40 OS=Drosophila melanogaster (Fruit fly)	2.06e-85	PREDICTED: ubiquitin-60S ribosomal protein L40 [Hydra vulgaris]	4.67e-87	RL40_DROME	FALSE	11.4165	72	2	19.7823	3.05079	i_nb1,i_nb2,i_neuron/gland_cell_progenitor,i_neuron_progenitor,i_SC,i_stem_cell/progenitor	interstitial	i_nb,i_neuron_progenitor,i_SC,i_stem_cell_progenitor	body
t7990aep	t7990aep|H4_DENKL	PF15511.6	CENP-T_C	Q6LAF1|H4_DENKL Histone H4 OS=Dendronephthya klunzingeri (Klunzinger's soft coral)	6.11e-51	Histone H4 [Heterocephalus glaber]	5.2e-49	H4_DENKL	FALSE	10.525	75	2	20.3981	0.651909	i_male_germline,i_nb1	germ line,interstitial	i_male_germline,i_nb	body
t6774aep	t6774aep|ADT_CHLRE	PF00153.27	Mito_carr	P27080|ADT_CHLRE ADP,ATP carrier protein OS=Chlamydomonas reinhardtii (Chlamydomonas smithii)	5.62e-132	PREDICTED: ADP,ATP carrier protein 3, mitochondrial-like [Hydra vulgaris]	0	ADT_CHLRE	FALSE	9.92334	79	2	17.2856	2.56108	ecEp_battery_cell1(mp),ecEp_battery_cell2(mp),ecEp_head,ecEp_stem_cell	ectoderm	ecEp_battery_cell,ecEp_head,ecEp_stem_cell	head,body
t12705aep	t12705aep|CEBPA_HUMAN	PF07716.15	bZIP_2	P49715|CEBPA_HUMAN CCAAT/enhancer-binding protein alpha {ECO:0000312|HGNC:HGNC:1833} OS=Homo sapiens (Human)	1.16e-15	PREDICTED: uncharacterized protein LOC100204711 [Hydra vulgaris]	0	CEBPA_HUMAN	FALSE	9.52289	81	2	16.4709	2.57488	ecEp_battery_cell1(mp),ecEp_battery_cell2(mp),ecEp_head,enEp-nb(pd),enEp-nem(pd),enEp_foot,enEp_head,enEp_SC1,enEp_stem_cell,enEp_tent-nem(pd),enEp_tentacle,i_nematocyte,i_neuron_en3	ectoderm,endoderm,interstitial	ecEp_battery_cell,ecEp_head,enEp-nb,enEp-nem,enEp_foot,enEp_head,enEp_SC1,enEp_stem_cell,enEp_tent-nem,enEp_tentacle,i_nematocyte,i_neuron_en	head,body,foot,nerve net
t32296aep	t32296aep|HSP70_HYDVU	PF00012.20;PF06723.13;PF14450.6	HSP70;MreB_Mbl;FtsA	Q05944|HSP70_HYDVU Heat shock 70 kDa protein OS=Hydra vulgaris (Hydra) (Hydra attenuata)	0	heat shock 70 kDa protein [Hydra vulgaris] >gi|93213412|gb|ABC25030.1| heat shock protein 70 [Hydra vulgaris] >gi|93213414|gb|ABC25031.1| heat shock protein 70 [Hydra vulgaris]	0	HSP70_HYDVU	TRUE	9.33605	82	2	17.2885	1.38359	i_female_germline2_nurse	germ line	i_female_germline	body
t19311aep	t19311aep|RL7A_TAKRU	PF01248.26	Ribosomal_L7Ae	P32429|RL7A_CHICK 60S ribosomal protein L7a OS=Gallus gallus (Chicken)	8.9e-108	PREDICTED: 60S ribosomal protein L7a-like [Hydra vulgaris]	8.09e-153	RL7A_TAKRU	FALSE	8.9469	85	2	15.5611	2.33271	i_nb1,i_nb2,i_neuron/gland_cell_progenitor,i_neuron_progenitor,i_SC,i_stem_cell/progenitor	interstitial	i_nb,i_neuron_progenitor,i_SC,i_stem_cell_progenitor	body
t31409aep	t31409aep|TRF6A_XENLA	PF02176.18;PF15227.6;PF13445.6;PF00097.25;PF13920.6	zf-TRAF;zf-C3HC4_4;zf-RING_UBOX;zf-C3HC4;zf-C3HC4_3	Q3MV19|TRF6A_XENLA TNF receptor-associated factor 6-A OS=Xenopus laevis (African clawed frog)	2.45e-31	PREDICTED: TNF receptor-associated factor 6-A-like [Hydra vulgaris]	3.27e-112	TRF6A_XENLA	FALSE	8.726	86	2	15.4942	1.9578	enEp-nb(pd),enEp-nem(pd),enEp_foot,enEp_head,enEp_SC1,enEp_stem_cell	endoderm	enEp-nb,enEp-nem,enEp_foot,enEp_head,enEp_SC1,enEp_stem_cell	body,head,foot
t4540aep	t4540aep|RS7_RAT	PF01251.18	Ribosomal_S7e	P62083|RS7_RAT 40S ribosomal protein S7 OS=Rattus norvegicus (Rat)	1.31e-91	PREDICTED: 40S ribosomal protein S7-like [Hydra vulgaris]	5.26e-129	RS7_RAT	FALSE	8.64287	88	2	15.4756	1.81013	i_female_germline1,i_nb1,i_nb2,i_neuron/gland_cell_progenitor,i_neuron_progenitor,i_SC,i_stem_cell/progenitor	germ line,interstitial	i_female_germline,i_nb,i_neuron_progenitor,i_SC,i_stem_cell_progenitor	body
t19450aep	t19450aep|RL10_DROME	PF00252.18	Ribosomal_L16	O61231|RL10_DROME 60S ribosomal protein L10 OS=Drosophila melanogaster (Fruit fly)	2.69e-119	60S ribosomal protein L10-like [Hydra vulgaris] >gi|221117576|ref|XP_002161791.1| PREDICTED: 60S ribosomal protein L10-like isoform X1 [Hydra vulgaris] >gi|33337358|gb|AAQ13347.1|U60651_1 ribosomal protein L10 [Hydra vulgaris]	1.06e-157	RL10_DROME	FALSE	8.5878	89	2	15.5791	1.5965	i_nb1,i_nb2,i_neuron/gland_cell_progenitor,i_neuron_progenitor,i_SC,i_stem_cell/progenitor	interstitial	i_nb,i_neuron_progenitor,i_SC,i_stem_cell_progenitor	body
t24801aep	t24801aep|RS26_ANOGA	PF01283.19	Ribosomal_S26e	Q9GT45|RS26_ANOGA 40S ribosomal protein S26 OS=Anopheles gambiae (African malaria mosquito)	3.07e-46	PREDICTED: 40S ribosomal protein S26-like [Hydra vulgaris]	2.83e-72	RS26_ANOGA	FALSE	8.40376	90	2	14.1463	2.66122	i_nb1,i_nb2,i_neuron/gland_cell_progenitor,i_neuron_progenitor,i_SC,i_stem_cell/progenitor	interstitial	i_nb,i_neuron_progenitor,i_SC,i_stem_cell_progenitor	body
t24459aep	t24459aep	PF03314.14	DUF273			Uncharacterized protein CELE_F41D3.11 [Caenorhabditis elegans] >gi|919006374|emb|CAB04382.2| Uncharacterized protein CELE_F41D3.11 [Caenorhabditis elegans]	2.96e-31		FALSE	8.36516	91	2	6.06333	10.667	ecEp_battery_cell1(mp),ecEp_battery_cell2(mp),ecEp_head,ecEp_stem_cell	ectoderm	ecEp_battery_cell,ecEp_head,ecEp_stem_cell	head,body
t22774aep	t22774aep								FALSE	8.27693	92	2	13.3604	3.19346	enEp-nb(pd),enEp-nem(pd),enEp_foot,enEp_head,enEp_SC1,enEp_stem_cell,enEp_tent-nem(pd),enEp_tentacle	endoderm	enEp-nb,enEp-nem,enEp_foot,enEp_head,enEp_SC1,enEp_stem_cell,enEp_tent-nem,enEp_tentacle	body,head,foot
t20513aep	t20513aep|RL18A_DANRE	PF01775.17	Ribosomal_L18A	Q7ZWJ4|RL18A_DANRE 60S ribosomal protein L18a OS=Danio rerio (Zebrafish) (Brachydanio rerio)	6.84e-80	PREDICTED: 60S ribosomal protein L18a-like [Hydra vulgaris]	1.39e-120	RL18A_DANRE	FALSE	8.27393	93	2	12.9678	3.58007	i_nb1,i_nb2,i_neuron/gland_cell_progenitor,i_SC,i_stem_cell/progenitor	interstitial	i_nb,i_neuron_progenitor,i_SC,i_stem_cell_progenitor	body
t18181aep	t18181aep|RL24_DROME	PF01246.20	Ribosomal_L24e	Q9VJY6|RL24_DROME 60S ribosomal protein L24 OS=Drosophila melanogaster (Fruit fly)	7.98e-52	PREDICTED: 60S ribosomal protein L24-like [Hydra vulgaris]	5.21e-71	RL24_DROME	FALSE	8.08136	95	2	14.6422	1.52051	i_neuron/gland_cell_progenitor,i_neuron_progenitor,i_SC,i_stem_cell/progenitor	interstitial	i_neuron_progenitor,i_SC,i_stem_cell_progenitor	body
t20047aep	t20047aep|TBA1D_BOVIN	PF00091.25;PF03953.17	Tubulin;Tubulin_C	Q2HJ86|TBA1D_BOVIN Tubulin alpha-1D chain OS=Bos taurus (Bovine)	0	PREDICTED: tubulin alpha-1 chain [Hydra vulgaris]	0	TBA1D_BOVIN	FALSE	8.04768	96	2	13.8383	2.25706	i_male_germline,i_nematocyte,i_neuron_ec1,i_neuron_ec2,i_neuron_ec3,i_neuron_ec4,i_neuron_en1,i_neuron_progenitor	germ line,interstitial,ectoderm,endoderm	i_male_germline,i_nematocyte,i_neuron_ec,i_neuron_en,i_neuron_progenitor	body,head,nerve net
t6797aep	t6797aep|RL32_RAT	PF01655.18	Ribosomal_L32e	P62912|RL32_RAT 60S ribosomal protein L32 OS=Rattus norvegicus (Rat)	2.11e-54	PREDICTED: 60S ribosomal protein L32-like [Hydra vulgaris] >gi|828200506|ref|XP_012554937.1| PREDICTED: 60S ribosomal protein L32-like [Hydra vulgaris]	2.74e-77	RL32_RAT	FALSE	7.96317	98	2	13.6238	2.30254	i_nb1,i_nb2,i_neuron/gland_cell_progenitor,i_neuron_progenitor,i_stem_cell/progenitor	interstitial	i_nb,i_neuron_progenitor,i_stem_cell_progenitor	body
t37817aep	t37817aep|RS6_BRAFL	PF01092.19	Ribosomal_S6e	O01727|RS6_BRAFL 40S ribosomal protein S6 OS=Branchiostoma floridae (Florida lancelet) (Amphioxus)	1.47e-113	PREDICTED: 40S ribosomal protein S6-like [Hydra vulgaris]	1.23e-164	RS6_BRAFL	FALSE	7.70945	101	2	13.9349	1.484	i_nb1,i_nb2,i_neuron/gland_cell_progenitor,i_neuron_progenitor,i_SC,i_stem_cell/progenitor	interstitial	i_nb,i_neuron_progenitor,i_SC,i_stem_cell_progenitor	body
t10591aep	t10591aep|RL5_HUMAN	PF17144.4;PF14204.6	Ribosomal_L5e;Ribosomal_L18_c	P46777|RL5_HUMAN 60S ribosomal protein L5 OS=Homo sapiens (Human)	1.31e-137	PREDICTED: 60S ribosomal protein L5-like [Hydra vulgaris]	0	RL5_HUMAN	FALSE	7.67544	102	2	13.2027	2.14819	i_nb1,i_nb2,i_nb3,i_neuron/gland_cell_progenitor,i_neuron_progenitor,i_stem_cell/progenitor	interstitial	i_nb,i_neuron_progenitor,i_stem_cell_progenitor	body
t33887aep	t33887aep								FALSE	7.49223	105	2	12.2672	2.71726	enEp_tent-nem(pd)	endoderm	enEp_tent-nem	head
t581aep	t581aep|RS15_ELAOL	PF00203.21	Ribosomal_S19	Q945U1|RS15_ELAOL 40S ribosomal protein S15 OS=Elaeis oleifera (American oil palm) (Corozo oleifera)	2.29e-63	PREDICTED: 40S ribosomal protein S15-like [Hydra vulgaris]	2.5e-90	RS15_ELAOL	FALSE	7.31424	108	2	11.7571	2.87139	i_nb1,i_nb2,i_neuron/gland_cell_progenitor,i_neuron_progenitor,i_SC,i_stem_cell/progenitor	interstitial	i_nb,i_neuron_progenitor,i_SC,i_stem_cell_progenitor	body
t22105aep	t22105aep|RL34_DANRE	PF01199.18	Ribosomal_L34e	Q7ZWJ7|RL34_DANRE 60S ribosomal protein L34 OS=Danio rerio (Zebrafish) (Brachydanio rerio)	5.26e-28	PREDICTED: 60S ribosomal protein L34-like isoform X2 [Hydra vulgaris]	1.77e-45	RL34_DANRE	FALSE	7.30445	109	2	12.8446	1.76429	i_nb1,i_nb2,i_neuron/gland_cell_progenitor,i_neuron_progenitor,i_SC,i_stem_cell/progenitor	interstitial	i_nb,i_neuron_progenitor,i_SC,i_stem_cell_progenitor	body
t15075aep	t15075aep|HMCN1_HUMAN	PF00090.19	TSP_1	Q96RW7|HMCN1_HUMAN Hemicentin-1 OS=Homo sapiens (Human)	4.61e-23	PREDICTED: SCO-spondin-like, partial [Hydra vulgaris]	0	HMCN1_HUMAN	FALSE	7.17148	112	2	14.0916	0.251357	ecEp_battery_cell1(mp),ecEp_battery_cell2(mp),ecEp_head,ecEp_stem_cell	ectoderm	ecEp_battery_cell,ecEp_head,ecEp_stem_cell	head,body
t30421aep	t30421aep|RL13A_MACFA	PF00572.18	Ribosomal_L13	Q4R8Z2|RL13A_MACFA 60S ribosomal protein L13a OS=Macaca fascicularis (Crab-eating macaque) (Cynomolgus monkey)	6.45e-83	PREDICTED: 60S ribosomal protein L13a-like [Hydra vulgaris] >gi|828205615|ref|XP_012556675.1| PREDICTED: 60S ribosomal protein L13a-like [Hydra vulgaris]	1.2e-118	RL13A_MACFA	FALSE	7.06911	114	2	12.3863	1.75192	i_female_germline1,i_nb1,i_nb2,i_neuron/gland_cell_progenitor,i_neuron_progenitor,i_SC,i_stem_cell/progenitor	germ line,interstitial	i_female_germline,i_nb,i_neuron_progenitor,i_SC,i_stem_cell_progenitor	body
t22744aep	t22744aep|CIRBB_XENLA	PF00076.22	RRM_1	Q9DED4|CIRBB_XENLA Cold-inducible RNA-binding protein B OS=Xenopus laevis (African clawed frog)	1.31e-17	PREDICTED: glycine-rich RNA-binding protein 1-like [Hydra vulgaris]	1.41e-47	CIRBB_XENLA	FALSE	7.0309	115	2	12.733	1.32881	i_female_germline1,i_nb1,i_neuron/gland_cell_progenitor,i_neuron_en1,i_neuron_en3,i_neuron_progenitor,i_stem_cell/progenitor	germ line,interstitial,endoderm	i_female_germline,i_nb,i_neuron_progenitor,i_neuron_en,i_stem_cell_progenitor	body,nerve net
t5505aep	t5505aep|RS20_XENLA	PF00338.22	Ribosomal_S10	P23403|RS20_XENLA 40S ribosomal protein S20 OS=Xenopus laevis (African clawed frog)	2.53e-61	PREDICTED: 40S ribosomal protein S20-like [Hydra vulgaris]	7.92e-74	RS20_XENLA	FALSE	7.01463	116	2	13.2899	0.739357	i_nb1,i_nb2,i_nb5,i_neuron/gland_cell_progenitor,i_neuron_progenitor,i_SC,i_stem_cell/progenitor	interstitial	i_nb,i_neuron_progenitor,i_SC,i_stem_cell_progenitor	body
t7105aep	t7105aep								FALSE	6.8266	117	2	12.0987	1.55451	ecEp_battery_cell1(mp),ecEp_battery_cell2(mp),ecEp_head,ecEp_stem_cell,i_nematocyte	ectoderm,interstitial	ecEp_battery_cell,ecEp_head,ecEp_stem_cell,i_nematocyte	head,body
t578aep	t578aep					PREDICTED: uncharacterized protein LOC105844599 [Hydra vulgaris]	3.06e-07		FALSE	6.80046	118	2	10.8966	2.70431	enEp-nb(pd),enEp-nem(pd),enEp_head,enEp_SC1,enEp_stem_cell,enEp_tentacle,i_zymogen_gland_cell	endoderm,interstitial	enEp-nb,enEp-nem,enEp_head,enEp_SC1,enEp_stem_cell,enEp_tentacle,i_gland_cell	body,head
t28206aep	t28206aep|WHRN_HUMAN	PF00595.24;PF17820.1	PDZ;PDZ_6	Q9P202|WHRN_HUMAN Whirlin OS=Homo sapiens (Human)	3.16e-06	PREDICTED: GATA zinc finger domain-containing protein 24-like, partial [Hydra vulgaris]	1.52e-79	WHRN_HUMAN	FALSE	6.66164	119	2	5.06577	8.2575	ecEp_battery_cell1(mp),ecEp_battery_cell2(mp),ecEp_head,ecEp_stem_cell	ectoderm	ecEp_battery_cell,ecEp_head,ecEp_stem_cell	head,body
t36179aep	t36179aep|RL8_XENLA	PF03947.18;PF00181.23	Ribosomal_L2_C;Ribosomal_L2	P41116|RL8_XENLA 60S ribosomal protein L8 OS=Xenopus laevis (African clawed frog)	4.15e-140	PREDICTED: 60S ribosomal protein L8-like [Hydra vulgaris]	2.06e-175	RL8_XENLA	FALSE	6.51534	123	2	12.3201	0.710572	i_nb1,i_nb2,i_neuron/gland_cell_progenitor,i_neuron_progenitor,i_SC,i_stem_cell/progenitor	interstitial	i_nb,i_neuron_progenitor,i_SC,i_stem_cell_progenitor	body
t16847aep	t16847aep|1433Z_DROME	PF00244.20	14/03/03	P29310|1433Z_DROME 14-3-3 protein zeta OS=Drosophila melanogaster (Fruit fly)	2.26e-90	14-3-3 protein zeta-like [Hydra vulgaris] >gi|401815149|gb|AFQ20831.1| 14-3-3 protein [Hydra vulgaris]	6.1e-177	1433Z_DROME	FALSE	6.49977	124	2	11.0855	1.91404	ecEp_basal_disk,ecEp_battery_cell1(mp),ecEp_battery_cell2(mp),enEp_tentacle,i_nematocyte,i_neuron_en1,i_neuron_en3	ectoderm,endoderm,interstitial	ecEp_basal_disk,ecEp_battery_cell,enEp_tentacle,i_nematocyte,i_neuron_en	foot,head,nerve net
t29257aep	t29257aep|UBC_RAT	PF00240.23;PF11976.8;PF14560.6;PF18396.1;PF13881.6;PF18037.1;PF10302.9	ubiquitin;Rad60-SLD;Ubiquitin_2;TBK1_ULD;Rad60-SLD_2;Ubiquitin_5;DUF2407	Q63429|UBC_RAT Polyubiquitin-C OS=Rattus norvegicus (Rat)	0	PREDICTED: polyubiquitin-B [Hydra vulgaris] >gi|449665888|ref|XP_002158413.2| PREDICTED: polyubiquitin-B [Hydra vulgaris]	0	UBC_RAT	FALSE	6.47377	125	2	10.0891	2.85845	ecEp_basal_disk,ecEp_battery_cell1(mp),ecEp_battery_cell2(mp),i_nematocyte,i_neuron_ec1,i_spumous_mucous_gland_cell	ectoderm,interstitial	ecEp_basal_disk,ecEp_battery_cell,i_nematocyte,i_neuron_ec,i_gland_cell	foot,head,nerve net
t15600aep	t15600aep|RLA0_RANSY	PF00466.20;PF00428.19;PF17777.1	Ribosomal_L10;Ribosomal_60s;RL10P_insert	Q9DG68|RLA0_RANSY 60S acidic ribosomal protein P0 OS=Rana sylvatica (Wood frog)	3.43e-113	PREDICTED: 60S acidic ribosomal protein P0-like [Hydra vulgaris]	7.35e-178	RLA0_RANSY	FALSE	6.41488	126	2	11.1852	1.64455	i_female_germline1,i_nb1,i_nb2,i_neuron/gland_cell_progenitor,i_stem_cell/progenitor	germ line,interstitial	i_female_germline,i_nb,i_neuron_progenitor,i_stem_cell_progenitor	body
t6234aep	t6234aep|AGRE1_HUMAN	PF12947.7;PF12946.7;PF07645.15	EGF_3;EGF_MSP1_1;EGF_CA	Q14246|AGRE1_HUMAN Adhesion G protein-coupled receptor E1 {ECO:0000303|PubMed:25713288} OS=Homo sapiens (Human)	3.24e-11	PREDICTED: neurogenic locus notch homolog protein 1-like isoform X2 [Hydra vulgaris]	0	AGRE1_HUMAN	FALSE	6.26763	128	2	11.7676	0.767657	ecEp_battery_cell1(mp),ecEp_battery_cell2(mp),ecEp_head,ecEp_stem_cell	ectoderm	ecEp_battery_cell,ecEp_head,ecEp_stem_cell	head,body
t11369aep	t11369aep|TCTP_HYDVU	PF00838.17	TCTP	Q94587|TCTP_HYDVU Translationally-controlled tumor protein homolog OS=Hydra vulgaris (Hydra) (Hydra attenuata)	2.05e-118	translationally-controlled tumor protein homolog [Hydra vulgaris] >gi|6094440|sp|Q94587.1|TCTP_HYDVU RecName: Full=Translationally-controlled tumor protein homolog; Short=TCTP >gi|1661225|gb|AAB18413.1| translationally controlled tumor protein [Hydra vulgaris]	3.96e-116	TCTP_HYDVU	FALSE	6.24119	129	2	10.1557	2.32668	ecEp_basal_disk	ectoderm	ecEp_basal_disk	foot
t36069aep	t36069aep|RS16_HETFO	PF00380.19	Ribosomal_S9	Q98TR7|RS16_HETFO 40S ribosomal protein S16 OS=Heteropneustes fossilis (Stinging catfish)	1.43e-78	ribosomal protein S16, partial [Hydra vulgaris]	9.24e-97	RS16_HETFO	FALSE	6.1717	130	2	10.5566	1.7868	i_nb1,i_nb2,i_neuron/gland_cell_progenitor,i_neuron_progenitor,i_SC,i_stem_cell/progenitor	interstitial	i_nb,i_neuron_progenitor,i_SC,i_stem_cell_progenitor	body
t12063aep	t12063aep|RL9_ICTPU	PF00347.23	Ribosomal_L6	Q90YW0|RL9_ICTPU 60S ribosomal protein L9 OS=Ictalurus punctatus (Channel catfish) (Silurus punctatus)	6.71e-83	PREDICTED: 60S ribosomal protein L9-like [Hydra vulgaris]	8.94e-133	RL9_ICTPU	FALSE	6.1633	132	2	10.8728	1.4538	i_nb1,i_nb2,i_neuron/gland_cell_progenitor,i_SC,i_stem_cell/progenitor	interstitial	i_nb,i_neuron_progenitor,i_SC,i_stem_cell_progenitor	body
t28759aep	t28759aep					PREDICTED: protein hunchback-like [Hydra vulgaris]	1.28e-54		FALSE	6.12509	134	2	3.40133	8.84884	i_nb3	interstitial	i_nb	body
t12714aep	t12714aep|RS9_DROME	PF01479.25	S4	P55935|RS9_DROME 40S ribosomal protein S9 OS=Drosophila melanogaster (Fruit fly)	4.22e-104	PREDICTED: 40S ribosomal protein S9 [Hydra vulgaris]	1.4e-118	RS9_DROME	FALSE	6.10719	136	2	10.7886	1.42577	i_nb1,i_nb2,i_neuron/gland_cell_progenitor,i_neuron_progenitor,i_SC,i_stem_cell/progenitor	interstitial	i_nb,i_neuron_progenitor,i_SC,i_stem_cell_progenitor	body
t19158aep	t19158aep|RS25_BRABE	PF03297.15	Ribosomal_S25	Q8ISN9|RS25_BRABE 40S ribosomal protein S25 OS=Branchiostoma belcheri (Amphioxus)	3.85e-32	PREDICTED: 40S ribosomal protein S25-like [Hydra vulgaris]	4.87e-48	RS25_BRABE	FALSE	6.07308	137	2	9.97102	2.17514	i_nb1,i_nb2,i_neuron/gland_cell_progenitor,i_neuron_progenitor,i_SC,i_stem_cell/progenitor	interstitial	i_nb,i_neuron_progenitor,i_SC,i_stem_cell_progenitor	body
t28720aep	t28720aep|RS4_XENTR	PF00900.20;PF16121.5;PF08071.12;PF00467.29	Ribosomal_S4e;40S_S4_C;RS4NT;KOW	Q6PBC4|RS4_XENTR 40S ribosomal protein S4 OS=Xenopus tropicalis (Western clawed frog) (Silurana tropicalis)	1.94e-145	PREDICTED: 40S ribosomal protein S4-like [Hydra vulgaris]	0	RS4_XENTR	FALSE	5.99543	138	2	11.0953	0.895562	i_nb1,i_nb2,i_neuron/gland_cell_progenitor,i_neuron_progenitor,i_stem_cell/progenitor	interstitial	i_nb,i_neuron_progenitor,i_stem_cell_progenitor	body
t15581aep	t15581aep|TBB_PARLI	PF00091.25;PF03953.17	Tubulin;Tubulin_C	P11833|TBB_PARLI Tubulin beta chain OS=Paracentrotus lividus (Common sea urchin)	0	PREDICTED: tubulin beta chain [Hydra vulgaris]	0	TBB_PARLI	FALSE	5.88927	141	2	10.4747	1.30384	ecEp_basal_disk,i_female_germline1,i_male_germline,i_nb1,i_nematocyte,i_neuron_ec1,i_neuron_ec3,i_neuron_ec4,i_neuron_en1,i_neuron_en3,i_neuron_progenitor,i_SC,i_stem_cell/progenitor	ectoderm,germ line,interstitial,endoderm	ecEp_basal_disk,i_female_germline,i_male_germline,i_nb,i_nematocyte,i_neuron_ec,i_neuron_en,i_neuron_progenitor,i_SC,i_stem_cell_progenitor	foot,body,head,nerve net
t7310aep	t7310aep|COFI_GIBZE	PF00241.20	Cofilin_ADF	Q4I963|COFI_GIBZE Cofilin OS=Gibberella zeae (strain PH-1 / ATCC MYA-4620 / FGSC 9075 / NRRL 31084)(Wheat head blight fungus) (Fusarium graminearum)	1.15e-13	PREDICTED: cofilin-like [Hydra vulgaris]	3.06e-105	COFI_GIBZE	FALSE	5.81105	142	2	10.1763	1.44579	ecEp_battery_cell1(mp),ecEp_battery_cell2(mp),ecEp_head,ecEp_stem_cell,enEp-nem(pd),enEp_foot,enEp_head,enEp_SC1,enEp_stem_cell,enEp_tentacle	ectoderm,endoderm	ecEp_battery_cell,ecEp_head,ecEp_stem_cell,enEp-nem,enEp_foot,enEp_head,enEp_SC1,enEp_stem_cell,enEp_tentacle	head,body,foot
t4651aep	t4651aep|RS3A_NEMVE	PF01015.18	Ribosomal_S3Ae	A7S3J7|RS3A_NEMVE 40S ribosomal protein S3a {ECO:0000255|HAMAP-Rule:MF_03122} OS=Nematostella vectensis (Starlet sea anemone)	2.73e-124	PREDICTED: 40S ribosomal protein S3a-like [Hydra vulgaris]	9.09e-166	RS3A_NEMVE	FALSE	5.77508	144	2	8.82274	2.72742	i_nb1,i_nb2,i_neuron/gland_cell_progenitor,i_neuron_progenitor,i_SC,i_stem_cell/progenitor	interstitial	i_nb,i_neuron_progenitor,i_SC,i_stem_cell_progenitor	body
t5071aep	t5071aep|RS10_SPOFR	PF03501.15	S10_plectin	Q962R9|RS10_SPOFR 40S ribosomal protein S10 OS=Spodoptera frugiperda (Fall armyworm)	3e-51	PREDICTED: 40S ribosomal protein S10-like [Hydra vulgaris] >gi|221091269|ref|XP_002161801.1| PREDICTED: 40S ribosomal protein S10-like [Hydra vulgaris]	2.34e-89	RS10_SPOFR	FALSE	5.75049	145	2	9.41649	2.08449	i_female_germline1,i_nb1,i_nb2,i_neuron/gland_cell_progenitor,i_stem_cell/progenitor	germ line,interstitial	i_female_germline,i_nb,i_neuron_progenitor,i_stem_cell_progenitor	body
t31407aep	t31407aep|TRF6A_XENLA	PF02176.18;PF15227.6;PF13920.6	zf-TRAF;zf-C3HC4_4;zf-C3HC4_3	Q3MV19|TRF6A_XENLA TNF receptor-associated factor 6-A OS=Xenopus laevis (African clawed frog)	3.92e-37	PREDICTED: TNF receptor-associated factor 6-A-like [Hydra vulgaris]	5.06e-126	TRF6A_XENLA	FALSE	5.74608	146	2	11.0972	0.394959	ecEp_battery_cell1(mp),ecEp_battery_cell2(mp)	ectoderm	ecEp_battery_cell	head
t4931aep	t4931aep|RS18_BRABE	PF00416.22	Ribosomal_S13	Q8ISP0|RS18_BRABE 40S ribosomal protein S18 OS=Branchiostoma belcheri (Amphioxus)	4.76e-85	PREDICTED: 40S ribosomal protein S18 [Hydra vulgaris]	3.91e-95	RS18_BRABE	FALSE	5.7062	147	2	10.8229	0.58951	i_nb1,i_nb2,i_neuron/gland_cell_progenitor,i_neuron_progenitor,i_SC,i_stem_cell/progenitor	interstitial	i_nb,i_neuron_progenitor,i_SC,i_stem_cell_progenitor	body
t4117aep	t4117aep								FALSE	5.7	148	2	4.35856	7.04144	ecEp_head	ectoderm	ecEp_head	head
t22780aep	t22780aep|BHMT1_XENLA	PF02574.16	S-methyl_trans	Q5XGM3|BHMT1_XENLA Betaine--homocysteine S-methyltransferase 1 OS=Xenopus laevis (African clawed frog)	0	PREDICTED: betaine--homocysteine S-methyltransferase 1-like [Hydra vulgaris]	0	BHMT1_XENLA	FALSE	5.63671	149	2	10.5238	0.749624	enEp-nb(pd),enEp-nem(pd),enEp_foot,enEp_head,enEp_SC1,enEp_stem_cell,i_female_germline1,i_female_germline2_nurse,i_neuron/gland_cell_progenitor	endoderm,germ line,interstitial	enEp-nb,enEp-nem,enEp_foot,enEp_head,enEp_SC1,enEp_stem_cell,i_female_germline,i_neuron_progenitor	body,head,foot
t12708aep	t12708aep|EGR1_XENTR	PF13465.6;PF00096.26;PF13894.6	zf-H2C2_2;zf-C2H2;zf-C2H2_4	A4II20|EGR1_XENTR Early growth response protein 1 {ECO:0000250|UniProtKB:P08046} OS=Xenopus tropicalis (Western clawed frog) (Silurana tropicalis)	4.75e-49	PREDICTED: early growth response protein 1-B-like [Hydra vulgaris]	2.6e-169	EGR1_XENTR	FALSE	5.5954	150	2	9.50216	1.68864	ecEp_battery_cell1(mp),ecEp_battery_cell2(mp),i_neuron_ec1,i_neuron_ec3,i_neuron_ec4,i_neuron_ec5,i_neuron_en1,i_neuron_en2,i_neuron_en3	ectoderm,endoderm	ecEp_battery_cell,i_neuron_ec,i_neuron_en	head,nerve net
t22753aep	t22753aep|RS19_RAT	PF01090.19	Ribosomal_S19e	P17074|RS19_RAT 40S ribosomal protein S19 OS=Rattus norvegicus (Rat)	8.53e-55	PREDICTED: 40S ribosomal protein S19-like [Hydra vulgaris] >gi|449671659|ref|XP_004207540.1| PREDICTED: 40S ribosomal protein S19-like [Hydra vulgaris] >gi|828203665|ref|XP_012556013.1| PREDICTED: 40S ribosomal protein S19-like [Hydra vulgaris]	4.01e-98	RS19_RAT	FALSE	5.53611	151	2	9.9374	1.13482	i_female_germline1,i_nb1,i_nb2,i_neuron/gland_cell_progenitor,i_neuron_progenitor,i_SC,i_stem_cell/progenitor	germ line,interstitial	i_female_germline,i_nb,i_neuron_progenitor,i_SC,i_stem_cell_progenitor	body
t21158aep	t21158aep|AZIN2_XENLA	PF00278.22;PF02784.16	Orn_DAP_Arg_deC;Orn_Arg_deC_N	Q9I8S4|AZIN2_XENLA Antizyme inhibitor 2 OS=Xenopus laevis (African clawed frog)	9.95e-136	PREDICTED: antizyme inhibitor 2-like [Hydra vulgaris]	0	AZIN2_XENLA	FALSE	5.52933	152	2	10.35	0.708664	enEp-nb(pd),enEp-nem(pd),enEp_foot,enEp_head,enEp_SC1,enEp_stem_cell,enEp_tent-nem(pd),enEp_tentacle,i_neuron_ec1,i_neuron_ec3,i_neuron_ec4,i_neuron_en1,i_neuron_progenitor	endoderm,ectoderm,interstitial	enEp-nb,enEp-nem,enEp_foot,enEp_head,enEp_SC1,enEp_stem_cell,enEp_tent-nem,enEp_tentacle,i_neuron_ec,i_neuron_en,i_neuron_progenitor	body,head,foot,nerve net
t29024aep	t29024aep|RL19_RAT	PF01280.20	Ribosomal_L19e	P84100|RL19_RAT 60S ribosomal protein L19 OS=Rattus norvegicus (Rat)	5.44e-63	PREDICTED: 60S ribosomal protein L19-like [Hydra vulgaris]	4.24e-93	RL19_RAT	FALSE	5.52175	153	2	9.5576	1.48591	i_nb1,i_nb2,i_neuron/gland_cell_progenitor,i_neuron_progenitor,i_SC,i_stem_cell/progenitor	interstitial	i_nb,i_neuron_progenitor,i_SC,i_stem_cell_progenitor	body
t22738aep	t22738aep|RLA1_DROME	PF00428.19	Ribosomal_60s	P08570|RLA1_DROME 60S acidic ribosomal protein P1 OS=Drosophila melanogaster (Fruit fly)	1.08e-23	PREDICTED: 60S acidic ribosomal protein P1-like [Hydra vulgaris]	1.44e-41	RLA1_DROME	FALSE	5.50228	154	2	8.49429	2.51028	i_nb1,i_nb2,i_neuron/gland_cell_progenitor,i_neuron_progenitor,i_stem_cell/progenitor	interstitial	i_nb,i_neuron_progenitor,i_stem_cell_progenitor	body
t12043aep	t12043aep|RS12_CHICK	PF01248.26	Ribosomal_L7Ae	P84175|RS12_CHICK 40S ribosomal protein S12 OS=Gallus gallus (Chicken)	3.13e-64	PREDICTED: 40S ribosomal protein S12-like [Hydra vulgaris]	2.17e-98	RS12_CHICK	FALSE	5.46526	155	2	9.69122	1.2393	i_nb1,i_nb2,i_neuron/gland_cell_progenitor,i_neuron_progenitor,i_SC,i_stem_cell/progenitor	interstitial	i_nb,i_neuron_progenitor,i_SC,i_stem_cell_progenitor	body
t23203aep	t23203aep|RL23A_RAT	PF03939.13;PF00276.20	Ribosomal_L23eN;Ribosomal_L23	P62752|RL23A_RAT 60S ribosomal protein L23a OS=Rattus norvegicus (Rat)	1.03e-60	PREDICTED: 60S ribosomal protein L23a-like [Hydra vulgaris]	1.86e-83	RL23A_RAT	FALSE	5.44564	156	2	9.76072	1.13055	i_female_germline1,i_nb1,i_nb2,i_neuron/gland_cell_progenitor,i_neuron_progenitor,i_SC,i_stem_cell/progenitor	germ line,interstitial	i_female_germline,i_nb,i_neuron_progenitor,i_SC,i_stem_cell_progenitor	body
t11846aep	t11846aep|RL13_DANRE	PF01294.18	Ribosomal_L13e	Q90Z10|RL13_DANRE 60S ribosomal protein L13 OS=Danio rerio (Zebrafish) (Brachydanio rerio)	6.84e-77	PREDICTED: 60S ribosomal protein L13-like [Hydra vulgaris]	3.43e-124	RL13_DANRE	FALSE	5.44276	157	2	9.90267	0.982859	i_nb1,i_nb2,i_neuron/gland_cell_progenitor,i_neuron_progenitor,i_SC,i_stem_cell/progenitor	interstitial	i_nb,i_neuron_progenitor,i_SC,i_stem_cell_progenitor	body
t26619aep	t26619aep					pulmonary surfactant-associated protein D-like precursor [Hydra vulgaris] >gi|828208963|ref|XP_012557804.1| PREDICTED: pulmonary surfactant-associated protein D-like isoform X1 [Hydra vulgaris] >gi|357197050|tpg|DAA34979.1| TPA_exp: minicollagen 5 [Hydra vulgaris]	2.56e-22		FALSE	5.38088	158	2	9.96763	0.794139	i_nb3,i_nb4,i_nb5	interstitial	i_nb	body
t597aep	t597aep|RL28_HUMAN	PF01778.17	Ribosomal_L28e	P46779|RL28_HUMAN 60S ribosomal protein L28 OS=Homo sapiens (Human)	8.44e-26	PREDICTED: 60S ribosomal protein L28-like [Hydra vulgaris]	7.59e-77	RL28_HUMAN	FALSE	5.29858	161	2	9.88074	0.716412	i_nb1,i_nb2,i_neuron/gland_cell_progenitor,i_neuron_progenitor,i_SC,i_stem_cell/progenitor	interstitial	i_nb,i_neuron_progenitor,i_SC,i_stem_cell_progenitor	body
t24201aep	t24201aep|PABP1_MOUSE	PF00076.22;PF00658.18;PF13893.6	RRM_1;PABP;RRM_5	P29341|PABP1_MOUSE Polyadenylate-binding protein 1 OS=Mus musculus (Mouse)	0	PREDICTED: polyadenylate-binding protein 4-like [Hydra vulgaris]	0	PABP1_MOUSE	FALSE	5.25294	162	2	10.0352	0.470679	i_nb1,i_SC,i_stem_cell/progenitor	interstitial	i_nb,i_SC,i_stem_cell_progenitor	body
t19890aep	t19890aep|RLA2_CRYST	PF00428.19	Ribosomal_60s	O61463|RLA2_CRYST 60S acidic ribosomal protein P2 OS=Cryptochiton stelleri (Giant gumboot chiton)	6.61e-15	PREDICTED: 60S acidic ribosomal protein P2-like [Hydra vulgaris]	7.59e-29	RLA2_CRYST	FALSE	5.22335	163	2	9.27268	1.17401	i_nb1,i_nb2,i_neuron/gland_cell_progenitor,i_neuron_progenitor,i_SC,i_stem_cell/progenitor	interstitial	i_nb,i_neuron_progenitor,i_SC,i_stem_cell_progenitor	body
t22751aep	t22751aep|RSSA_HYDVD	PF00318.20;PF16122.5	Ribosomal_S2;40S_SA_C	P38984|RSSA_HYDVD 40S ribosomal protein SA {ECO:0000255|HAMAP-Rule:MF_03015} OS=Hydra viridissima (Green hydra) (Chlorohydra viridissima)	0	PREDICTED: 40S ribosomal protein SA [Hydra vulgaris] >gi|828217855|ref|XP_012560786.1| PREDICTED: 40S ribosomal protein SA [Hydra vulgaris] >gi|828217859|ref|XP_012560788.1| PREDICTED: 40S ribosomal protein SA [Hydra vulgaris] >gi|828217861|ref|XP_012560789.1| PREDICTED: 40S ribosomal protein SA [Hydra vulgaris]	0	RSSA_HYDVD	FALSE	5.19778	164	2	8.90463	1.49093	i_nb1,i_nb2,i_neuron/gland_cell_progenitor,i_neuron_progenitor,i_stem_cell/progenitor	interstitial	i_nb,i_neuron_progenitor,i_stem_cell_progenitor	body
t19380aep	t19380aep								FALSE	5.17411	165	2	4.07125	6.27698	ecEp_stem_cell	ectoderm	ecEp_stem_cell	body
t31587aep	t31587aep|RL31_PONAB	PF01198.19	Ribosomal_L31e	Q5RBR9|RL31_PONAB 60S ribosomal protein L31 OS=Pongo abelii (Sumatran orangutan) (Pongo pygmaeus abelii)	1.26e-38	PREDICTED: 60S ribosomal protein L31-like [Hydra vulgaris]	1.96e-58	RL31_PONAB	FALSE	5.15875	166	2	8.62164	1.69586	i_nb1,i_nb2,i_neuron/gland_cell_progenitor,i_neuron_progenitor,i_SC,i_stem_cell/progenitor	interstitial	i_nb,i_neuron_progenitor,i_SC,i_stem_cell_progenitor	body
t15532aep	t15532aep|RL7_CAEEL	PF08079.12;PF00327.20	Ribosomal_L30_N;Ribosomal_L30	O01802|RL7_CAEEL 60S ribosomal protein L7 OS=Caenorhabditis elegans	1e-106	PREDICTED: 60S ribosomal protein L7-like [Hydra vulgaris]	9.54e-162	RL7_CAEEL	FALSE	5.1574	167	2	9.22379	1.091	i_nb1,i_nb2,i_neuron/gland_cell_progenitor,i_neuron_progenitor,i_SC,i_stem_cell/progenitor	interstitial	i_nb,i_neuron_progenitor,i_SC,i_stem_cell_progenitor	body
t3454aep	t3454aep|FRIS_LYMST	PF00210.24	Ferritin	P42577|FRIS_LYMST Soma ferritin OS=Lymnaea stagnalis (Great pond snail) (Helix stagnalis)	7.75e-23	PREDICTED: soma ferritin-like [Hydra vulgaris]	7.41e-54	FRIS_LYMST	FALSE	5.09174	168	2	8.06183	2.12165	ecEp_battery_cell1(mp),ecEp_battery_cell2(mp),enEp_stem_cell,enEp_tent-nem(pd),enEp_tentacle,i_neuron_ec1,i_neuron_ec2,i_neuron_ec3,i_neuron_ec4,i_neuron_en2,i_neuron_en3,i_neuron_progenitor	ectoderm,endoderm,interstitial	ecEp_battery_cell,enEp_stem_cell,enEp_tent-nem,enEp_tentacle,i_neuron_ec,i_neuron_en,i_neuron_progenitor	head,body,nerve net
t10534aep	t10534aep|RS29_IXOSC	PF00253.21	Ribosomal_S14	Q4PM47|RS29_IXOSC 40S ribosomal protein S29 OS=Ixodes scapularis (Black-legged tick) (Deer tick)	5.24e-24	PREDICTED: 40S ribosomal protein S29 [Cimex lectularius]	1.74e-23	RS29_IXOSC	FALSE	5.00731	169	2	9.06761	0.947006	i_neuron/gland_cell_progenitor,i_neuron_progenitor,i_SC,i_stem_cell/progenitor	interstitial	i_neuron_progenitor,i_SC,i_stem_cell_progenitor	body
t15519aep	t15519aep|RL35_RAT	PF00831.23	Ribosomal_L29	P17078|RL35_RAT 60S ribosomal protein L35 OS=Rattus norvegicus (Rat)	3.49e-52	PREDICTED: 60S ribosomal protein L35-like [Hydra vulgaris]	3.04e-78	RL35_RAT	FALSE	4.96629	170	2	8.91161	1.02097	i_nb1,i_neuron/gland_cell_progenitor,i_neuron_progenitor,i_SC,i_stem_cell/progenitor	interstitial	i_nb,i_neuron_progenitor,i_SC,i_stem_cell_progenitor	body
t17010aep	t17010aep|RL3_DROME	PF00297.22	Ribosomal_L3	O16797|RL3_DROME 60S ribosomal protein L3 OS=Drosophila melanogaster (Fruit fly)	0	PREDICTED: 60S ribosomal protein L3-like [Hydra vulgaris]	0	RL3_DROME	FALSE	4.89933	172	2	8.5226	1.27605	i_nb1,i_nb2,i_neuron/gland_cell_progenitor,i_neuron_progenitor,i_SC,i_stem_cell/progenitor	interstitial	i_nb,i_neuron_progenitor,i_SC,i_stem_cell_progenitor	body
t12089aep	t12089aep|RL39_SPOFR	PF00832.20	Ribosomal_L39	Q962S4|RL39_SPOFR 60S ribosomal protein L39 OS=Spodoptera frugiperda (Fall armyworm)	4.55e-24	ribosomal protein L39 [Danaus plexippus]	2.76e-23	RL39_SPOFR	FALSE	4.77468	173	2	7.56124	1.98812	i_nb1,i_neuron/gland_cell_progenitor,i_neuron_progenitor,i_stem_cell/progenitor	interstitial	i_nb,i_neuron_progenitor,i_stem_cell_progenitor	body
t30307aep	t30307aep					arminin 7722 [Hydra vulgaris]	2.89e-22		FALSE	4.76792	174	2	7.89099	1.64486	enEp-nb(pd),enEp-nem(pd),enEp_foot,enEp_SC1,enEp_stem_cell,enEp_tent-nem(pd),enEp_tentacle	endoderm	enEp-nb,enEp-nem,enEp_foot,enEp_SC1,enEp_stem_cell,enEp_tent-nem,enEp_tentacle	body,head,foot
t4122aep	t4122aep|RS3_RAT	PF00189.20;PF07650.17	Ribosomal_S3_C;KH_2	P62909|RS3_RAT 40S ribosomal protein S3 OS=Rattus norvegicus (Rat)	1.14e-130	PREDICTED: 40S ribosomal protein S3-like [Hydra vulgaris]	1.78e-161	RS3_RAT	FALSE	4.67966	177	2	7.99561	1.36371	i_nb1,i_nb2,i_neuron/gland_cell_progenitor,i_neuron_progenitor,i_stem_cell/progenitor	interstitial	i_nb,i_neuron_progenitor,i_stem_cell_progenitor	body
t29169aep	t29169aep|RL44_CANTR	PF00935.19	Ribosomal_L44	P27075|RL44_CANTR 60S ribosomal protein L44 OS=Candida tropicalis (Yeast)	1.92e-57	PREDICTED: 60S ribosomal protein L44 [Hydra vulgaris]	9.92e-67	RL44_CANTR	FALSE	4.66074	178	2	6.96726	2.35422	i_nb1,i_nb2,i_neuron/gland_cell_progenitor,i_neuron_progenitor,i_SC,i_stem_cell/progenitor	interstitial	i_nb,i_neuron_progenitor,i_SC,i_stem_cell_progenitor	body
t19447aep	t19447aep|GELS2_LUMTE	PF00626.22	Gelsolin	Q8MPM1|GELS2_LUMTE Gelsolin-like protein 2 OS=Lumbricus terrestris (Common earthworm)	6.17e-101	PREDICTED: gelsolin-like protein 1 [Hydra vulgaris]	0	GELS2_LUMTE	FALSE	4.64194	179	2	7.69934	1.58453	ecEp_basal_disk,ecEp_battery_cell1(mp),ecEp_head,ecEp_stem_cell,enEp-nb(pd),enEp-nem(pd),enEp_foot,enEp_head,enEp_SC1,enEp_stem_cell,enEp_tent-nem(pd),enEp_tentacle	ectoderm,endoderm	ecEp_basal_disk,ecEp_battery_cell,ecEp_head,ecEp_stem_cell,enEp-nb,enEp-nem,enEp_foot,enEp_head,enEp_SC1,enEp_stem_cell,enEp_tent-nem,enEp_tentacle	foot,head,body
t15530aep	t15530aep|CALR_MACFU	PF00262.18	Calreticulin	Q2HWU3|CALR_MACFU Calreticulin OS=Macaca fuscata fuscata (Japanese macaque)	2.76e-138	PREDICTED: calreticulin-like [Hydra vulgaris]	0	CALR_MACFU	FALSE	4.61747	180	2	7.92437	1.31057	ecEp_basal_disk,i_female_germline2_nurse,i_nb2,i_nb3,i_nb5,i_neuron_ec2,i_neuron_en1,i_neuron_en2,i_neuron_en3	ectoderm,germ line,interstitial,endoderm	ecEp_basal_disk,i_female_germline,i_nb,i_neuron_ec,i_neuron_en	foot,body,nerve net
t23600aep	t23600aep|RL30_SPOFR	PF01248.26	Ribosomal_L7Ae	P58375|RL30_SPOFR 60S ribosomal protein L30 OS=Spodoptera frugiperda (Fall armyworm)	1.24e-58	PREDICTED: 60S ribosomal protein L30-like [Hydra vulgaris] >gi|221107009|ref|XP_002161448.1| PREDICTED: 60S ribosomal protein L30-like [Hydra vulgaris]	2.38e-75	RL30_SPOFR	FALSE	4.61219	182	2	7.68961	1.53476	i_nb1,i_neuron/gland_cell_progenitor,i_neuron_progenitor,i_SC,i_stem_cell/progenitor	interstitial	i_nb,i_neuron_progenitor,i_SC,i_stem_cell_progenitor	body
t4525aep	t4525aep|RL18_DROME	PF17135.4	Ribosomal_L18	Q9VS34|RL18_DROME 60S ribosomal protein L18 OS=Drosophila melanogaster (Fruit fly)	4.42e-94	PREDICTED: 60S ribosomal protein L18-like [Hydra vulgaris]	2.37e-127	RL18_DROME	FALSE	4.61152	183	2	8.36871	0.854335	i_nb1,i_nb2,i_neuron/gland_cell_progenitor,i_neuron_progenitor,i_SC,i_stem_cell/progenitor	interstitial	i_nb,i_neuron_progenitor,i_SC,i_stem_cell_progenitor	body
t4560aep	t4560aep|EF2_BOMMO	PF00009.27;PF03764.18;PF00679.24;PF03144.25;PF14492.6	GTP_EFTU;EFG_IV;EFG_C;GTP_EFTU_D2;EFG_II	Q1HPK6|EF2_BOMMO Translation elongation factor 2 OS=Bombyx mori (Silk moth)	0	PREDICTED: translation elongation factor 2-like [Hydra vulgaris]	0	EF2_BOMMO	FALSE	4.56708	184	2	8.49718	0.636975	i_female_germline1,i_female_germline2_nurse,i_nb1,i_nb2,i_SC,i_stem_cell/progenitor	germ line,interstitial	i_female_germline,i_nb,i_SC,i_stem_cell_progenitor	body
t12090aep	t12090aep|RS24_PONAB	PF01282.19	Ribosomal_S24e	Q5RAQ8|RS24_PONAB 40S ribosomal protein S24 OS=Pongo abelii (Sumatran orangutan) (Pongo pygmaeus abelii)	1.07e-29	PREDICTED: 40S ribosomal protein S24-like isoform X1 [Hydra vulgaris]	2.16e-46	RS24_PONAB	FALSE	4.52994	185	2	7.81355	1.24632	i_female_germline1,i_nb1,i_nb2,i_neuron/gland_cell_progenitor,i_neuron_progenitor,i_stem_cell/progenitor	germ line,interstitial	i_female_germline,i_nb,i_neuron_progenitor,i_stem_cell_progenitor	body
t22127aep	t22127aep|EF1G_RABIT	PF00647.19;PF02798.20;PF00043.25;PF13417.6	EF1G;GST_N;GST_C;GST_N_3	P29694|EF1G_RABIT Elongation factor 1-gamma OS=Oryctolagus cuniculus (Rabbit)	1.57e-123	PREDICTED: elongation factor 1-gamma-like [Hydra vulgaris]	0	EF1G_RABIT	FALSE	4.52412	186	2	8.07914	0.969105	i_female_germline1,i_nb1,i_nb2,i_neuron/gland_cell_progenitor,i_neuron_progenitor,i_stem_cell/progenitor	germ line,interstitial	i_female_germline,i_nb,i_neuron_progenitor,i_stem_cell_progenitor	body
t21370aep	t21370aep								FALSE	4.4645	188	1	8.92899	0	enEp-nb(pd),i_nb2,i_nb3,i_nb4,i_nb5	endoderm,interstitial	enEp-nb,i_nb	body
t5016aep	t5016aep								FALSE	4.4462	189	2	8.59858	0.29383	ecEp_battery_cell1(mp),ecEp_battery_cell2(mp)	ectoderm	ecEp_battery_cell	head
t19290aep	t19290aep								FALSE	4.40842	190	2	8.31407	0.50277	ecEp_basal_disk,ecEp_battery_cell1(mp),ecEp_head,ecEp_stem_cell	ectoderm	ecEp_basal_disk,ecEp_battery_cell,ecEp_head,ecEp_stem_cell	foot,head,body
t5483aep	t5483aep|GBLP_HYDVU	PF00400.32;PF12894.7	WD40;ANAPC4_WD40	Q25189|GBLP_HYDVU Guanine nucleotide-binding protein subunit beta-like protein OS=Hydra vulgaris (Hydra) (Hydra attenuata)	0	guanine nucleotide-binding protein subunit beta-like protein [Hydra vulgaris] >gi|2494908|sp|Q25189.1|GBLP_HYDVU RecName: Full=Guanine nucleotide-binding protein subunit beta-like protein; AltName: Full=Receptor of activated protein kinase C; Short=RACK >gi|1321870|emb|CAA66387.1| put.activated protein kinase C receptor [Hydra vulgaris]	0	GBLP_HYDVU	FALSE	4.27396	193	2	7.96739	0.580525	i_female_germline1,i_nb1,i_nb2,i_neuron/gland_cell_progenitor,i_neuron_progenitor,i_stem_cell/progenitor	germ line,interstitial	i_female_germline,i_nb,i_neuron_progenitor,i_stem_cell_progenitor	body
t5479aep	t5479aep|RL27A_XENLA	PF00828.19	Ribosomal_L27A	P47830|RL27A_XENLA 60S ribosomal protein L27a OS=Xenopus laevis (African clawed frog)	3.14e-54	PREDICTED: 60S ribosomal protein L27a-like [Hydra vulgaris]	1.21e-77	RL27A_XENLA	FALSE	4.16608	197	2	7.3157	1.01646	i_nb1,i_nb2,i_neuron/gland_cell_progenitor,i_neuron_progenitor,i_SC,i_stem_cell/progenitor	interstitial	i_nb,i_neuron_progenitor,i_SC,i_stem_cell_progenitor	body
t22157aep	t22157aep|RS11_RAT	PF16205.5;PF00366.20	Ribosomal_S17_N;Ribosomal_S17	P62282|RS11_RAT 40S ribosomal protein S11 OS=Rattus norvegicus (Rat)	2.4e-77	PREDICTED: 40S ribosomal protein S11-like [Hydra vulgaris]	3.86e-106	RS11_RAT	FALSE	4.13266	199	2	7.78737	0.477948	i_nb1,i_nb2,i_neuron/gland_cell_progenitor,i_neuron_progenitor,i_SC,i_stem_cell/progenitor	interstitial	i_nb,i_neuron_progenitor,i_SC,i_stem_cell_progenitor	body
t29276aep	t29276aep|RS8_SPOFR	PF01201.22	Ribosomal_S8e	Q8WQI5|RS8_SPOFR 40S ribosomal protein S8 OS=Spodoptera frugiperda (Fall armyworm)	3.86e-96	PREDICTED: 40S ribosomal protein S8-like [Hydra vulgaris]	1.86e-143	RS8_SPOFR	FALSE	4.1311	200	2	7.10053	1.16167	i_nb1,i_nb2,i_neuron/gland_cell_progenitor,i_neuron_progenitor,i_SC,i_stem_cell/progenitor	interstitial	i_nb,i_neuron_progenitor,i_SC,i_stem_cell_progenitor	body
t37794aep	t37794aep					PREDICTED: formin-like protein 5 isoform X2 [Hydra vulgaris]	1.55e-17		FALSE	4.09544	202	2	4.97764	3.21325	enEp-nb(pd),i_nb2,i_nb3,i_nb4,i_nb5,i_nematocyte	endoderm,interstitial	enEp-nb,i_nb,i_nematocyte	body,head
t19267aep	t19267aep|RL15_NEUCR	PF00827.17	Ribosomal_L15e	Q8X034|RL15_NEUCR 60S ribosomal protein L15 OS=Neurospora crassa (strain ATCC 24698 / 74-OR23-1A / CBS 7081257 / FGSC 987)	4.47e-90	PREDICTED: 60S ribosomal protein L15-like [Hydra vulgaris]	1.72e-121	RL15_NEUCR	FALSE	4.05753	203	2	7.08514	1.02992	i_nb1,i_nb2,i_neuron/gland_cell_progenitor,i_neuron_progenitor,i_SC,i_stem_cell/progenitor	interstitial	i_nb,i_neuron_progenitor,i_SC,i_stem_cell_progenitor	body
t12731aep	t12731aep|RL4A_ARATH	PF00573.22;PF14374.6	Ribosomal_L4;Ribos_L4_asso_C	Q9SF40|RL4A_ARATH 60S ribosomal protein L4-1 OS=Arabidopsis thaliana (Mouse-ear cress)	7.35e-153	PREDICTED: 60S ribosomal protein L4-B-like [Hydra vulgaris]	0	RL4A_ARATH	FALSE	4.00598	205	2	6.29836	1.71361	i_nb1,i_neuron/gland_cell_progenitor,i_stem_cell/progenitor	interstitial	i_nb,i_neuron_progenitor,i_stem_cell_progenitor	body
t18627aep	t18627aep|RS5_PODCA	PF00177.21	Ribosomal_S7	Q08364|RS5_PODCA 40S ribosomal protein S5 OS=Podocoryna carnea (Jellyfish)	1.6e-127	PREDICTED: 40S ribosomal protein S5-like isoform X1 [Hydra vulgaris]	2.53e-164	RS5_PODCA	FALSE	3.88627	207	2	6.67715	1.0954	i_nb1,i_nb2,i_neuron/gland_cell_progenitor,i_neuron_progenitor,i_stem_cell/progenitor	interstitial	i_nb,i_neuron_progenitor,i_stem_cell_progenitor	body
t31038aep	t31038aep	PF01290.20	Thymosin			thypedin [Hydra vulgaris]	2.62e-90		FALSE	3.85626	209	2	6.39986	1.31266	ecEp_basal_disk,ecEp_battery_cell1(mp),ecEp_battery_cell2(mp),ecEp_head,ecEp_stem_cell,enEp_foot,enEp_head,enEp_tent-nem(pd),enEp_tentacle,i_female_germline2_nurse	ectoderm,endoderm,germ line	ecEp_basal_disk,ecEp_battery_cell,ecEp_head,ecEp_stem_cell,enEp_foot,enEp_head,enEp_tent-nem,enEp_tentacle,i_female_germline	foot,head,body
t14459aep	t14459aep|RL37A_CRYST	PF01780.19	Ribosomal_L37ae	O61462|RL37A_CRYST 60S ribosomal protein L37a OS=Cryptochiton stelleri (Giant gumboot chiton)	9.14e-45	PREDICTED: 60S ribosomal protein L37a-like [Hydra vulgaris]	1.79e-55	RL37A_CRYST	FALSE	3.84931	210	2	6.56593	1.13268	i_nb1,i_nb2,i_neuron/gland_cell_progenitor,i_neuron_progenitor,i_SC,i_stem_cell/progenitor	interstitial	i_nb,i_neuron_progenitor,i_SC,i_stem_cell_progenitor	body
t6633aep	t6633aep								FALSE	3.82129	211	2	7.1959	0.446689	i_nb2,i_nb3,i_nb4,i_nb5	interstitial	i_nb	body
t28027aep	t28027aep|RS27A_DROME	PF00240.23;PF01599.19;PF11976.8	ubiquitin;Ribosomal_S27;Rad60-SLD	P15357|RS27A_DROME Ubiquitin-40S ribosomal protein S27a OS=Drosophila melanogaster (Fruit fly)	8.75e-65	PREDICTED: ubiquitin-40S ribosomal protein S27a [Hydra vulgaris]	4.55e-75	RS27A_DROME	FALSE	3.81981	212	2	6.23365	1.40597	i_nb1,i_nb2,i_neuron/gland_cell_progenitor,i_neuron_progenitor,i_stem_cell/progenitor	interstitial	i_nb,i_neuron_progenitor,i_stem_cell_progenitor	body
t26258aep	t26258aep|CSRP2_CHICK	PF00412.22	LIM	P50460|CSRP2_CHICK Cysteine and glycine-rich protein 2 OS=Gallus gallus (Chicken)	4.53e-13	PREDICTED: cysteine and glycine-rich protein 1-like [Hydra vulgaris]	6.76e-35	CSRP2_CHICK	FALSE	3.81856	213	2	7.32635	0.310765	ecEp_head,ecEp_stem_cell,enEp-nb(pd),enEp-nem(pd),enEp_foot,enEp_head,enEp_SC1,enEp_stem_cell,enEp_tent-nem(pd),enEp_tentacle	ectoderm,endoderm	ecEp_head,ecEp_stem_cell,enEp-nb,enEp-nem,enEp_foot,enEp_head,enEp_SC1,enEp_stem_cell,enEp_tent-nem,enEp_tentacle	head,body,foot
t462aep	t462aep|NDK_CHICK	PF00334.19	NDK	O57535|NDK_CHICK Nucleoside diphosphate kinase OS=Gallus gallus (Chicken)	4.48e-70	nucleoside diphosphate kinase-like [Hydra vulgaris] >gi|14029141|gb|AAK51137.1| nucleoside diphosphate kinase [Hydra vulgaris]	5.11e-105	NDK_CHICK	FALSE	3.8087	214	2	6.09809	1.5193	ecEp_head,ecEp_stem_cell,i_nb1,i_nb2,i_neuron/gland_cell_progenitor,i_SC,i_stem_cell/progenitor	ectoderm,interstitial	ecEp_head,ecEp_stem_cell,i_nb,i_neuron_progenitor,i_SC,i_stem_cell_progenitor	head,body
t12628aep	t12628aep|ATPA_PONAB	PF00006.25;PF00306.27;PF02874.23	ATP-synt_ab;ATP-synt_ab_C;ATP-synt_ab_N	Q5R546|ATPA_PONAB ATP synthase subunit alpha, mitochondrial OS=Pongo abelii (Sumatran orangutan) (Pongo pygmaeus abelii)	0	PREDICTED: ATP synthase subunit alpha, mitochondrial [Hydra vulgaris]	0	ATPA_PONAB	FALSE	3.6506	216	2	5.02627	2.27492	i_nb1,i_neuron/gland_cell_progenitor,i_SC,i_stem_cell/progenitor	interstitial	i_nb,i_neuron_progenitor,i_SC,i_stem_cell_progenitor	body
t25680aep	t25680aep|PROP_HUMAN	PF00090.19;PF00092.28;PF13519.6	TSP_1;VWA;VWA_2	P27918|PROP_HUMAN Properdin OS=Homo sapiens (Human)	1.26e-09	PREDICTED: properdin-like, partial [Hydra vulgaris]	0	PROP_HUMAN	FALSE	3.61257	217	1	7.03098	0.194156	ecEp_battery_cell1(mp),ecEp_battery_cell2(mp),ecEp_head,ecEp_stem_cell	ectoderm	ecEp_battery_cell,ecEp_head,ecEp_stem_cell	head,body
t30028aep	t30028aep|TBA1_PARLI	PF00091.25;PF03953.17	Tubulin;Tubulin_C	P18258|TBA1_PARLI Tubulin alpha-1 chain OS=Paracentrotus lividus (Common sea urchin)	0	PREDICTED: tubulin alpha-1 chain [Hydra vulgaris]	0	TBA1_PARLI	FALSE	3.54803	219	2	6.33044	0.765627	ecEp_battery_cell2(mp),i_nb5,i_nematocyte,i_neuron_ec1,i_neuron_ec2,i_neuron_ec3,i_neuron_ec4,i_neuron_ec5,i_neuron_en1,i_neuron_progenitor	ectoderm,interstitial,endoderm	ecEp_battery_cell,i_nb,i_nematocyte,i_neuron_ec,i_neuron_en,i_neuron_progenitor	head,body,nerve net
t16535aep	t16535aep|POSTN_HUMAN	PF02469.22;PF13519.6	Fasciclin;VWA_2	Q15063|POSTN_HUMAN Periostin OS=Homo sapiens (Human)	2.04e-09	PREDICTED: uncharacterized protein LOC101240985 [Hydra vulgaris]	0	POSTN_HUMAN	FALSE	3.54169	220	2	6.84841	0.234973	enEp_tent-nem(pd),enEp_tentacle	endoderm	enEp_tent-nem,enEp_tentacle	head
t16860aep	t16860aep|TPM1_HYDVU	PF00261.20;PF12718.7	Tropomyosin;Tropomyosin_1	P39921|TPM1_HYDVU Tropomyosin-1 OS=Hydra vulgaris (Hydra) (Hydra attenuata)	9.96e-50	PREDICTED: tropomyosin-1-like [Hydra vulgaris]	1.52e-133	TPM1_HYDVU	FALSE	3.53925	221	2	5.90796	1.17054	ecEp_battery_cell1(mp),ecEp_battery_cell2(mp),ecEp_head,ecEp_stem_cell,enEp_foot,enEp_tent-nem(pd),enEp_tentacle,i_nematocyte,i_neuron_ec1	ectoderm,endoderm,interstitial	ecEp_battery_cell,ecEp_head,ecEp_stem_cell,enEp_foot,enEp_tent-nem,enEp_tentacle,i_nematocyte,i_neuron_ec	head,body,foot,nerve net
t940aep	t940aep|H90A1_DANRE	PF00183.18;PF02518.26;PF13589.6	HSP90;HATPase_c;HATPase_c_3	Q90474|H90A1_DANRE Heat shock protein HSP 90-alpha 1 OS=Danio rerio (Zebrafish) (Brachydanio rerio)	0	PREDICTED: heat shock protein HSP 90-alpha-like [Hydra vulgaris]	0	H90A1_DANRE	FALSE	3.48924	223	2	6.44875	0.529732	enEp_SC1,i_female_germline1,i_male_germline,i_nb1,i_neuron/gland_cell_progenitor,i_stem_cell/progenitor	endoderm,germ line,interstitial	enEp_SC1,i_female_germline,i_male_germline,i_nb,i_neuron_progenitor,i_stem_cell_progenitor	body
t27095aep	t27095aep|ANX12_HYDVU	PF00191.20	Annexin	P26256|ANX12_HYDVU Annexin-B12 OS=Hydra vulgaris (Hydra) (Hydra attenuata)	0	annexin-B12 [Hydra vulgaris] >gi|828220191|ref|XP_002155286.3| PREDICTED: annexin-B12 [Hydra vulgaris] >gi|113972|sp|P26256.1|ANX12_HYDVU RecName: Full=Annexin-B12; AltName: Full=Annexin XII; AltName: Full=Annexin-12 >gi|159256|gb|AAA29206.1| annexin XII [Hydra vulgaris]	0	ANX12_HYDVU	FALSE	3.4748	224	2	5.18266	1.76694	ecEp_basal_disk,ecEp_battery_cell1(mp),ecEp_battery_cell2(mp),ecEp_head,ecEp_stem_cell,enEp-nem(pd),enEp_foot,enEp_head,enEp_SC1,enEp_stem_cell,enEp_tentacle,i_neuron_ec4,i_neuron_ec5	ectoderm,endoderm	ecEp_basal_disk,ecEp_battery_cell,ecEp_head,ecEp_stem_cell,enEp-nem,enEp_foot,enEp_head,enEp_SC1,enEp_stem_cell,enEp_tentacle,i_neuron_ec	foot,head,body,nerve net
t12607aep	t12607aep|THIO_PLAF7	PF00085.20;PF13098.6	Thioredoxin;Thioredoxin_2	Q7KQL8|THIO_PLAF7 Thioredoxin OS=Plasmodium falciparum (isolate 3D7)	1.89e-26	PREDICTED: thioredoxin-like [Hydra vulgaris]	1.7e-50	THIO_PLAF7	FALSE	3.47222	225	2	5.66713	1.27731	ecEp_battery_cell1(mp),ecEp_battery_cell2(mp),ecEp_head,ecEp_stem_cell	ectoderm	ecEp_battery_cell,ecEp_head,ecEp_stem_cell	head,body
t1704aep	t1704aep|1433G_BOVIN	PF00244.20	14/03/03	P68252|1433G_BOVIN 14-3-3 protein gamma OS=Bos taurus (Bovine)	2.48e-96	14-3-3 protein gamma-like [Hydra vulgaris] >gi|27368037|gb|AAN87350.1| 14-3-3 protein B [Hydra vulgaris]	5.37e-167	1433G_BOVIN	FALSE	3.45063	227	2	5.9865	0.914768	i_neuron_progenitor	interstitial	i_neuron_progenitor	body
t11582aep	t11582aep|RL26_LITLI	PF16906.5	Ribosomal_L26	Q95WA0|RL26_LITLI 60S ribosomal protein L26 OS=Littorina littorea (Common periwinkle)	2.45e-56	PREDICTED: 60S ribosomal protein L26-like [Hydra vulgaris]	2.9e-89	RL26_LITLI	FALSE	3.38985	229	2	5.21648	1.56321	i_nb1,i_nb2,i_neuron/gland_cell_progenitor,i_neuron_progenitor,i_SC,i_stem_cell/progenitor	interstitial	i_nb,i_neuron_progenitor,i_SC,i_stem_cell_progenitor	body
t10202aep	t10202aep|BT3L4_DANRE	PF01849.18	NAC	Q6PC91|BT3L4_DANRE Transcription factor BTF3 homolog 4 OS=Danio rerio (Zebrafish) (Brachydanio rerio)	3.81e-71	PREDICTED: transcription factor BTF3 homolog 4-like [Hydra vulgaris]	9.26e-107	BT3L4_DANRE	FALSE	3.38024	230	2	5.99674	0.763738	i_female_germline1,i_nb1,i_neuron/gland_cell_progenitor,i_neuron_progenitor,i_stem_cell/progenitor	germ line,interstitial	i_female_germline,i_nb,i_neuron_progenitor,i_stem_cell_progenitor	body
t16171aep	t16171aep					PREDICTED: uncharacterized protein LOC105845407 [Hydra vulgaris]	8.96e-91		FALSE	3.22816	234	2	5.19928	1.25704	ecEp_basal_disk	ectoderm	ecEp_basal_disk	foot
t13669aep	t13669aep|PPIA_CRIGR	PF00160.21	Pro_isomerase	P14851|PPIA_CRIGR Peptidyl-prolyl cis-trans isomerase A OS=Cricetulus griseus (Chinese hamster) (Cricetulus barabensis griseus)	6.86e-70	PREDICTED: peptidyl-prolyl cis-trans isomerase-like [Hydra vulgaris]	1.56e-99	PPIA_CRIGR	FALSE	3.21564	235	2	5.51898	0.912307	ecEp_stem_cell,i_female_germline1,i_nb1,i_neuron/gland_cell_progenitor,i_neuron_progenitor,i_stem_cell/progenitor	ectoderm,germ line,interstitial	ecEp_stem_cell,i_female_germline,i_nb,i_neuron_progenitor,i_stem_cell_progenitor	body
t10717aep	t10717aep|ELOV5_XENTR	PF01151.18	ELO	Q5M8U1|ELOV5_XENTR Elongation of very long chain fatty acids protein 5 {ECO:0000255|HAMAP-Rule:MF_03205, ECO:0000305} OS=Xenopus tropicalis (Western clawed frog) (Silurana tropicalis)	2.07e-59	PREDICTED: elongation of very long chain fatty acids protein AAEL008004-like [Hydra vulgaris]	0	ELOV5_XENTR	FALSE	3.17479	236	2	5.25392	1.09566	ecEp_basal_disk,ecEp_battery_cell1(mp),enEp_head,enEp_SC1,enEp_stem_cell,enEp_tentacle	ectoderm,endoderm	ecEp_basal_disk,ecEp_battery_cell,enEp_head,enEp_SC1,enEp_stem_cell,enEp_tentacle	foot,head,body
t15979aep	t15979aep								FALSE	3.1661	237	2	4.64332	1.68889	enEp-nb(pd),enEp-nem(pd),enEp_head,enEp_SC1,enEp_stem_cell	endoderm	enEp-nb,enEp-nem,enEp_head,enEp_SC1,enEp_stem_cell	body,head
t32425aep	t32425aep|ANXA7_MOUSE	PF00191.20	Annexin	Q07076|ANXA7_MOUSE Annexin A7 OS=Mus musculus (Mouse)	3.4e-123	PREDICTED: annexin A4-like [Hydra vulgaris]	0	ANXA7_MOUSE	FALSE	3.09239	239	2	4.93774	1.24705	ecEp_battery_cell1(mp),ecEp_battery_cell2(mp),ecEp_head,ecEp_stem_cell,enEp_foot,enEp_head,enEp_SC1	ectoderm,endoderm	ecEp_battery_cell,ecEp_head,ecEp_stem_cell,enEp_foot,enEp_head,enEp_SC1	head,body,foot
t8308aep	t8308aep|MYH10_HUMAN	PF01576.19;PF00063.21;PF02736.19	Myosin_tail_1;Myosin_head;Myosin_N	P35580|MYH10_HUMAN Myosin-10 OS=Homo sapiens (Human)	0	PREDICTED: myosin-10-like [Hydra vulgaris]	0	MYH10_HUMAN	FALSE	3.08699	240	2	5.83684	0.337143	ecEp_head,ecEp_stem_cell,enEp-nem(pd),enEp_foot,enEp_head,enEp_SC1,enEp_stem_cell,enEp_tent-nem(pd),enEp_tentacle,i_nematocyte	ectoderm,endoderm,interstitial	ecEp_head,ecEp_stem_cell,enEp-nem,enEp_foot,enEp_head,enEp_SC1,enEp_stem_cell,enEp_tent-nem,enEp_tentacle,i_nematocyte	head,body,foot
t11854aep	t11854aep|NACA_ORENI	PF01849.18	NAC	Q8AWF2|NACA_ORENI Nascent polypeptide-associated complex subunit alpha OS=Oreochromis niloticus (Nile tilapia) (Tilapia nilotica)	4.63e-63	PREDICTED: nascent polypeptide-associated complex subunit alpha-like [Hydra vulgaris]	2.46e-134	NACA_ORENI	FALSE	3.0823	241	2	5.61835	0.54625	ecEp_stem_cell,i_female_germline1,i_nb1,i_neuron/gland_cell_progenitor,i_stem_cell/progenitor	ectoderm,germ line,interstitial	ecEp_stem_cell,i_female_germline,i_nb,i_neuron_progenitor,i_stem_cell_progenitor	body
t6410aep	t6410aep|NP1L1_PONAB	PF00956.18	NAP	Q5R4D4|NP1L1_PONAB Nucleosome assembly protein 1-like 1 OS=Pongo abelii (Sumatran orangutan) (Pongo pygmaeus abelii)	2.13e-106	PREDICTED: nucleosome assembly protein 1-like 1 [Hydra vulgaris]	0	NP1L1_PONAB	FALSE	3.06414	242	2	5.92369	0.204582	i_female_germline1,i_female_germline2_nurse,i_nb1,i_nb2,i_neuron/gland_cell_progenitor,i_stem_cell/progenitor	germ line,interstitial	i_female_germline,i_nb,i_neuron_progenitor,i_stem_cell_progenitor	body
t38463aep	t38463aep|RS17_BOVIN	PF00833.18	Ribosomal_S17e	A5PK63|RS17_BOVIN 40S ribosomal protein S17 OS=Bos taurus (Bovine)	1.04e-71	PREDICTED: 40S ribosomal protein S17-like [Hydra vulgaris]	4.98e-87	RS17_BOVIN	FALSE	3.02904	243	2	5.2678	0.790287	i_nb1,i_nb2,i_neuron/gland_cell_progenitor,i_SC,i_stem_cell/progenitor	interstitial	i_nb,i_neuron_progenitor,i_SC,i_stem_cell_progenitor	body
t30017aep	t30017aep|CATL_DROME	PF00112.23;PF08246.12	Peptidase_C1;Inhibitor_I29	Q95029|CATL_DROME Cathepsin L OS=Drosophila melanogaster (Fruit fly)	2.71e-132	PREDICTED: cathepsin L1-like [Hydra vulgaris]	0	CATL_DROME	FALSE	3.00556	244	2	5.12694	0.884181	enEp-nb(pd),enEp-nem(pd),enEp_foot,enEp_head,enEp_SC1,enEp_stem_cell,enEp_tent-nem(pd),enEp_tentacle	endoderm	enEp-nb,enEp-nem,enEp_foot,enEp_head,enEp_SC1,enEp_stem_cell,enEp_tent-nem,enEp_tentacle	body,head,foot
t26674aep	t26674aep					arminin-like peptide 7526 [Hydra vulgaris]	1.4e-15		FALSE	2.98867	245	2	5.46683	0.510513	enEp-nb(pd),enEp-nem(pd),enEp_foot,enEp_head,enEp_SC1,enEp_stem_cell,enEp_tent-nem(pd),enEp_tentacle	endoderm	enEp-nb,enEp-nem,enEp_foot,enEp_head,enEp_SC1,enEp_stem_cell,enEp_tent-nem,enEp_tentacle	body,head,foot
t34741aep	t34741aep					PREDICTED: uncharacterized protein LOC100199391 [Hydra vulgaris]	9.46e-64		FALSE	2.95271	246	1	5.71699	0.188425	enEp-nb(pd),enEp-nem(pd),enEp_foot,enEp_head,enEp_SC1,enEp_stem_cell,enEp_tent-nem(pd),enEp_tentacle	endoderm	enEp-nb,enEp-nem,enEp_foot,enEp_head,enEp_SC1,enEp_stem_cell,enEp_tent-nem,enEp_tentacle	body,head,foot
t22155aep	t22155aep|RS15A_RAT	PF00410.19	Ribosomal_S8	P62246|RS15A_RAT 40S ribosomal protein S15a OS=Rattus norvegicus (Rat)	6.17e-74	PREDICTED: 40S ribosomal protein S15a-like [Hydra vulgaris] >gi|449676023|ref|XP_004208538.1| PREDICTED: 40S ribosomal protein S15a-like [Hydra vulgaris]	5.75e-87	RS15A_RAT	FALSE	2.9511	247	2	4.81807	1.08413	i_neuron/gland_cell_progenitor,i_neuron_progenitor,i_SC,i_stem_cell/progenitor	interstitial	i_neuron_progenitor,i_SC,i_stem_cell_progenitor	body
t29425aep	t29425aep					collagen-related protein 3 precursor - Hydra magnipapillata [Hydra vulgaris] >gi|9451|emb|CAA43381.1| mini-collagen [Hydra sp.]	2.87e-12		FALSE	2.9039	249	1	5.67547	0.132338	enEp-nb(pd),i_nb2,i_nb3,i_nb4,i_nb5	endoderm,interstitial	enEp-nb,i_nb	body
t12732aep	t12732aep|RS13_XENLA	PF08069.12;PF00312.22	Ribosomal_S13_N;Ribosomal_S15	P49393|RS13_XENLA 40S ribosomal protein S13 OS=Xenopus laevis (African clawed frog)	1.34e-92	PREDICTED: 40S ribosomal protein S13 [Hydra vulgaris]	1.19e-103	RS13_XENLA	FALSE	2.88841	251	2	4.60887	1.16795	i_nb1,i_nb2,i_neuron/gland_cell_progenitor,i_neuron_progenitor,i_SC,i_stem_cell/progenitor	interstitial	i_nb,i_neuron_progenitor,i_SC,i_stem_cell_progenitor	body
t15548aep	t15548aep					PREDICTED: uncharacterized protein LOC100209382 [Hydra vulgaris]	1.69e-96		FALSE	2.75001	255	1	5.41318	0.0868427	enEp-nb(pd),i_nb2,i_nb3,i_nb4,i_nb5	endoderm,interstitial	enEp-nb,i_nb	body
t12715aep	t12715aep|IF4A2_RAT	PF00270.29;PF00271.31	DEAD;Helicase_C	Q5RKI1|IF4A2_RAT Eukaryotic initiation factor 4A-II OS=Rattus norvegicus (Rat)	0	PREDICTED: eukaryotic initiation factor 4A-I-like [Hydra vulgaris]	0	IF4A2_RAT	FALSE	2.70404	256	2	5.05016	0.357924	i_neuron_progenitor,i_SC,i_stem_cell/progenitor	interstitial	i_neuron_progenitor,i_SC,i_stem_cell_progenitor	body
t28277aep	t28277aep|H10A_XENLA			P22845|H10A_XENLA Histone H1.0-A OS=Xenopus laevis (African clawed frog)	4.48e-18	PREDICTED: histone H1-delta-like, partial [Hydra vulgaris]	2.82e-33	H10A_XENLA	FALSE	2.6925	257	1	5.26604	0.118961	i_female_germline1,i_male_germline,i_nb1,i_nb2,i_nb4,i_nematocyte,i_neuron/gland_cell_progenitor,i_neuron_ec1,i_neuron_ec2,i_neuron_ec3,i_neuron_ec4,i_neuron_ec5,i_neuron_en1,i_neuron_progenitor,i_SC,i_stem_cell/progenitor	germ line,interstitial,ectoderm,endoderm	i_female_germline,i_male_germline,i_nb,i_nematocyte,i_neuron_progenitor,i_neuron_ec,i_neuron_en,i_SC,i_stem_cell_progenitor	body,head,nerve net
t26814aep	t26814aep|RL10A_RAT	PF00687.21	Ribosomal_L1	P62907|RL10A_RAT 60S ribosomal protein L10a OS=Rattus norvegicus (Rat)	1.09e-102	PREDICTED: 60S ribosomal protein L10a-like [Hydra vulgaris]	4.36e-138	RL10A_RAT	FALSE	2.62919	260	2	4.79589	0.46248	i_nb1,i_nb2,i_neuron/gland_cell_progenitor,i_neuron_progenitor,i_SC,i_stem_cell/progenitor	interstitial	i_nb,i_neuron_progenitor,i_SC,i_stem_cell_progenitor	body
t9945aep	t9945aep					PREDICTED: uncharacterized protein LOC101236711 [Hydra vulgaris]	1.22e-60		FALSE	2.6119	261	2	4.46768	0.756123	ecEp_head,ecEp_stem_cell	ectoderm	ecEp_head,ecEp_stem_cell	head,body
t21171aep	t21171aep|RL12_RAT	PF03946.14;PF00298.19	Ribosomal_L11_N;Ribosomal_L11	P23358|RL12_RAT 60S ribosomal protein L12 OS=Rattus norvegicus (Rat)	9.28e-86	uncharacterized protein LOC100198049 [Hydra vulgaris] >gi|7635738|emb|CAB88388.1| L12 ribosomal protein [Hydra vulgaris]	1.92e-110	RL12_RAT	FALSE	2.60187	262	2	4.14841	1.05532	i_nb1,i_neuron/gland_cell_progenitor,i_neuron_progenitor,i_SC,i_stem_cell/progenitor	interstitial	i_nb,i_neuron_progenitor,i_SC,i_stem_cell_progenitor	body
t14557aep	t14557aep|EF1D_RAT	PF00736.19	EF1_GNE	Q68FR9|EF1D_RAT Elongation factor 1-delta OS=Rattus norvegicus (Rat)	2.66e-54	PREDICTED: elongation factor 1-delta-like isoform X1 [Hydra vulgaris]	6.67e-144	EF1D_RAT	FALSE	2.55578	263	2	4.27349	0.83807	ecEp_stem_cell,i_neuron/gland_cell_progenitor,i_neuron_progenitor,i_SC,i_stem_cell/progenitor	ectoderm,interstitial	ecEp_stem_cell,i_neuron_progenitor,i_SC,i_stem_cell_progenitor	body
t9558aep	t9558aep|MLC2_DROME	PF00036.32;PF13499.6;PF13405.6;PF14658.6;PF13833.6;PF13202.6	EF-hand_1;EF-hand_7;EF-hand_6;EF-hand_9;EF-hand_8;EF-hand_5	P54357|MLC2_DROME Myosin-2 essential light chain OS=Drosophila melanogaster (Fruit fly)	2.9e-42	PREDICTED: myosin-2 essential light chain-like [Hydra vulgaris]	1.4e-97	MLC2_DROME	FALSE	2.54073	264	2	3.69193	1.38953	ecEp_battery_cell1(mp),ecEp_battery_cell2(mp),ecEp_head,enEp-nb(pd),enEp-nem(pd),enEp_foot,enEp_head,enEp_SC1,enEp_stem_cell,enEp_tent-nem(pd),enEp_tentacle,i_nematocyte	ectoderm,endoderm,interstitial	ecEp_battery_cell,ecEp_head,enEp-nb,enEp-nem,enEp_foot,enEp_head,enEp_SC1,enEp_stem_cell,enEp_tent-nem,enEp_tentacle,i_nematocyte	head,body,foot
t23187aep	t23187aep|RL6_CHILA	PF01159.19;PF03868.15	Ribosomal_L6e;Ribosomal_L6e_N	Q6QMZ4|RL6_CHILA 60S ribosomal protein L6 OS=Chinchilla lanigera (Long-tailed chinchilla) (Chinchilla villidera)	2.17e-57	PREDICTED: 60S ribosomal protein L6-like [Hydra vulgaris]	1.3e-125	RL6_CHILA	FALSE	2.53899	265	2	4.67036	0.407612	ecEp_stem_cell,i_nb1,i_nb2,i_neuron/gland_cell_progenitor,i_neuron_progenitor,i_SC,i_stem_cell/progenitor	ectoderm,interstitial	ecEp_stem_cell,i_nb,i_neuron_progenitor,i_SC,i_stem_cell_progenitor	body
t31162aep	t31162aep|APLP_LOCMI	PF00094.25	VWD	Q9U943|APLP_LOCMI Apolipophorins OS=Locusta migratoria (Migratory locust)	1.11e-20	PREDICTED: uncharacterized protein LOC105844163 [Hydra vulgaris]	0	APLP_LOCMI	FALSE	2.53047	266	1	4.89822	0.162718	enEp-nb(pd),enEp-nem(pd),enEp_foot,enEp_head,enEp_SC1,enEp_stem_cell,enEp_tent-nem(pd),enEp_tentacle	endoderm	enEp-nb,enEp-nem,enEp_foot,enEp_head,enEp_SC1,enEp_stem_cell,enEp_tent-nem,enEp_tentacle	body,head,foot
t16668aep	t16668aep|SC61G_BRABE	PF00584.20	SecE	Q962X7|SC61G_BRABE Protein transport protein Sec61 subunit gamma OS=Branchiostoma belcheri (Amphioxus)	1.63e-21	PREDICTED: protein transport protein Sec61 subunit gamma isoform X1 [Corvus brachyrhynchos]	4.06e-20	SC61G_BRABE	FALSE	2.512	267	2	2.99372	2.03029	i_granular_mucous_gland_cell,i_nb2,i_nb3,i_nb4,i_nb5,i_neuron_progenitor,i_spumous_mucous_gland_cell	interstitial	i_granular_mucous_gland_cell,i_nb,i_neuron_progenitor,i_gland_cell	head,body
t25822aep	t25822aep					PREDICTED: mucin-5AC-like, partial [Hydra vulgaris]	5.89e-110		FALSE	2.48833	268	2	4.40825	0.56841	ecEp_battery_cell1(mp),ecEp_battery_cell2(mp),ecEp_head,ecEp_stem_cell	ectoderm	ecEp_battery_cell,ecEp_head,ecEp_stem_cell	head,body
t28501aep	t28501aep								FALSE	2.46868	270	1	4.73795	0.199416	enEp-nb(pd),enEp-nem(pd),enEp_foot,enEp_head,enEp_SC1,enEp_stem_cell,enEp_tent-nem(pd),enEp_tentacle	endoderm	enEp-nb,enEp-nem,enEp_foot,enEp_head,enEp_SC1,enEp_stem_cell,enEp_tent-nem,enEp_tentacle	body,head,foot
t17815aep	t17815aep|MVP_STRPU	PF01505.18;PF11978.8;PF17794.1;PF17795.1;PF17796.1	Vault;MVP_shoulder;Vault_2;Vault_3;Vault_4	Q5EAJ7|MVP_STRPU Major vault protein {ECO:0000312|EMBL:DAA05661.1} OS=Strongylocentrotus purpuratus (Purple sea urchin)	0	PREDICTED: major vault protein-like [Hydra vulgaris]	0	MVP_STRPU	FALSE	2.43284	272	2	4.31583	0.549844	ecEp_basal_disk,ecEp_battery_cell1(mp),ecEp_battery_cell2(mp),ecEp_head,ecEp_stem_cell,i_nematocyte	ectoderm,interstitial	ecEp_basal_disk,ecEp_battery_cell,ecEp_head,ecEp_stem_cell,i_nematocyte	foot,head,body
t8316aep	t8316aep|CATL_DROME	PF00112.23;PF08246.12	Peptidase_C1;Inhibitor_I29	Q95029|CATL_DROME Cathepsin L OS=Drosophila melanogaster (Fruit fly)	2.3e-135	PREDICTED: cathepsin L1-like [Hydra vulgaris]	0	CATL_DROME	FALSE	2.42714	273	2	4.30207	0.552217	ecEp_battery_cell1(mp),ecEp_battery_cell2(mp),ecEp_head,enEp-nb(pd),enEp-nem(pd),enEp_foot,enEp_head,enEp_SC1,enEp_stem_cell,enEp_tent-nem(pd),enEp_tentacle	ectoderm,endoderm	ecEp_battery_cell,ecEp_head,enEp-nb,enEp-nem,enEp_foot,enEp_head,enEp_SC1,enEp_stem_cell,enEp_tent-nem,enEp_tentacle	head,body,foot
t26085aep	t26085aep|TBA_LYTPI			P02553|TBA_LYTPI Tubulin alpha chain OS=Lytechinus pictus (Painted sea urchin)	1.82e-41	PREDICTED: tubulin alpha chain-like [Colobus angolensis palliatus]	5.26e-40	TBA_LYTPI	FALSE	2.38577	275	2	3.43729	1.33425	ecEp_battery_cell2(mp),i_nb1,i_nb5,i_nematocyte,i_neuron_ec1,i_neuron_ec2,i_neuron_ec3,i_neuron_ec4,i_neuron_en1,i_neuron_progenitor	ectoderm,interstitial,endoderm	ecEp_battery_cell,i_nb,i_nematocyte,i_neuron_ec,i_neuron_en,i_neuron_progenitor	head,body,nerve net
t78aep	t78aep					PREDICTED: uncharacterized protein LOC101235115 [Hydra vulgaris]	8.19e-70		FALSE	2.3694	276	2	3.78712	0.951687	enEp-nb(pd),enEp-nem(pd),enEp_foot,enEp_head,enEp_SC1,enEp_stem_cell,enEp_tent-nem(pd),enEp_tentacle	endoderm	enEp-nb,enEp-nem,enEp_foot,enEp_head,enEp_SC1,enEp_stem_cell,enEp_tent-nem,enEp_tentacle	body,head,foot
t13660aep	t13660aep|NAPEP_BOVIN	PF12706.7;PF13483.6	Lactamase_B_2;Lactamase_B_3	Q58CN9|NAPEP_BOVIN N-acyl-phosphatidylethanolamine-hydrolyzing phospholipase D OS=Bos taurus (Bovine)	2.67e-86	PREDICTED: N-acyl-phosphatidylethanolamine-hydrolyzing phospholipase D-like [Hydra vulgaris]	0	NAPEP_BOVIN	FALSE	2.36894	277	2	4.14064	0.597247	ecEp_basal_disk,ecEp_battery_cell1(mp),ecEp_battery_cell2(mp),ecEp_head,ecEp_stem_cell,enEp_foot,enEp_tentacle	ectoderm,endoderm	ecEp_basal_disk,ecEp_battery_cell,ecEp_head,ecEp_stem_cell,enEp_foot,enEp_tentacle	foot,head,body
t28475aep	t28475aep|REEP5_RAT	PF03134.19	TB2_DP1_HVA22	B2RZ37|REEP5_RAT Receptor expression-enhancing protein 5 OS=Rattus norvegicus (Rat)	2.3e-60	PREDICTED: receptor expression-enhancing protein 5-like [Hydra vulgaris]	1.34e-134	REEP5_RAT	FALSE	2.36234	278	2	3.11702	1.60767	ecEp_basal_disk,ecEp_battery_cell1(mp),ecEp_battery_cell2(mp),enEp-nb(pd),enEp-nem(pd),enEp_foot,enEp_head,enEp_SC1,enEp_stem_cell,enEp_tent-nem(pd),enEp_tentacle	ectoderm,endoderm	ecEp_basal_disk,ecEp_battery_cell,enEp-nb,enEp-nem,enEp_foot,enEp_head,enEp_SC1,enEp_stem_cell,enEp_tent-nem,enEp_tentacle	foot,head,body
t29675aep	t29675aep|RL22_RAT	PF01776.17	Ribosomal_L22e	P47198|RL22_RAT 60S ribosomal protein L22 OS=Rattus norvegicus (Rat)	6.62e-24	PREDICTED: 60S ribosomal protein L22-like [Hydra vulgaris]	1.61e-46	RL22_RAT	FALSE	2.33806	282	2	4.25035	0.425771	i_nb1,i_nb2,i_neuron/gland_cell_progenitor,i_SC,i_stem_cell/progenitor	interstitial	i_nb,i_neuron_progenitor,i_SC,i_stem_cell_progenitor	body
t17072aep	t17072aep|CALM_LUMRU	PF00036.32;PF13499.6;PF13833.6;PF13405.6;PF13202.6;PF14658.6;PF12763.7;PF10591.9;PF08976.11	EF-hand_1;EF-hand_7;EF-hand_8;EF-hand_6;EF-hand_5;EF-hand_9;EF-hand_4;SPARC_Ca_bdg;EF-hand_11	Q9GRJ1|CALM_LUMRU Calmodulin OS=Lumbricus rubellus (Humus earthworm)	1.45e-95	Calmodulin, partial [Trichinella pseudospiralis]	1.08e-95	CALM_LUMRU	FALSE	2.33783	283	2	4.13134	0.544315	i_male_germline,i_neuron/gland_cell_progenitor,i_neuron_ec1,i_neuron_progenitor,i_SC,i_stem_cell/progenitor	germ line,interstitial,ectoderm	i_male_germline,i_neuron_progenitor,i_neuron_ec,i_SC,i_stem_cell_progenitor	body,nerve net
t33520aep	t33520aep|DDX17_MOUSE	PF00270.29;PF00271.31	DEAD;Helicase_C	Q501J6|DDX17_MOUSE Probable ATP-dependent RNA helicase DDX17 OS=Mus musculus (Mouse)	0	PREDICTED: ATP-dependent RNA helicase dbp2-like isoform X1 [Hydra vulgaris]	0	DDX17_MOUSE	FALSE	2.31921	285	2	4.23738	0.401044	i_nb1,i_nb2,i_neuron/gland_cell_progenitor,i_neuron_progenitor,i_SC,i_stem_cell/progenitor	interstitial	i_nb,i_neuron_progenitor,i_SC,i_stem_cell_progenitor	body
t15229aep	t15229aep|DNAJ1_CHLAE	PF01556.18;PF00226.31;PF00684.19	DnaJ_C;DnaJ;DnaJ_CXXCXGXG	Q95JF4|DNAJ1_CHLAE DnaJ homolog subfamily A member 1 OS=Chlorocebus aethiops (Green monkey) (Cercopithecus aethiops)	3.47e-141	PREDICTED: dnaJ homolog subfamily A member 1-like [Hydra vulgaris]	0	DNAJ1_CHLAE	FALSE	2.31877	286	2	3.80618	0.831365	ecEp_battery_cell1(mp),ecEp_battery_cell2(mp),enEp_foot,enEp_head,enEp_SC1,enEp_stem_cell	ectoderm,endoderm	ecEp_battery_cell,enEp_foot,enEp_head,enEp_SC1,enEp_stem_cell	head,foot,body
t12035aep	t12035aep|MPCP_MOUSE	PF00153.27	Mito_carr	Q8VEM8|MPCP_MOUSE Phosphate carrier protein, mitochondrial OS=Mus musculus (Mouse)	1.31e-166	PREDICTED: phosphate carrier protein, mitochondrial-like [Hydra vulgaris]	0	MPCP_MOUSE	FALSE	2.30605	288	2	3.78871	0.823393	i_nematocyte,i_neuron_progenitor	interstitial	i_nematocyte,i_neuron_progenitor	head,body
t5494aep	t5494aep|EF1B_XENLA	PF00736.19;PF10587.9	EF1_GNE;EF-1_beta_acid	P30151|EF1B_XENLA Elongation factor 1-beta OS=Xenopus laevis (African clawed frog)	9.97e-73	PREDICTED: elongation factor 1-beta-like [Hydra vulgaris]	2.53e-129	EF1B_XENLA	FALSE	2.2863	289	2	3.85074	0.721853	i_female_germline1,i_female_germline2_nurse,i_nb1,i_neuron/gland_cell_progenitor,i_neuron_progenitor,i_SC,i_stem_cell/progenitor	germ line,interstitial	i_female_germline,i_nb,i_neuron_progenitor,i_SC,i_stem_cell_progenitor	body
t9521aep	t9521aep|RS23_ICTPU	PF00164.25	Ribosom_S12_S23	Q90YQ1|RS23_ICTPU 40S ribosomal protein S23 OS=Ictalurus punctatus (Channel catfish) (Silurus punctatus)	3.7e-76	PREDICTED: 40S ribosomal protein S23 [Hydra vulgaris]	1.44e-79	RS23_ICTPU	FALSE	2.2845	290	2	3.54977	1.01924	i_nb1,i_nb2,i_neuron/gland_cell_progenitor,i_neuron_progenitor,i_SC,i_stem_cell/progenitor	interstitial	i_nb,i_neuron_progenitor,i_SC,i_stem_cell_progenitor	body
t5886aep	t5886aep|H10A_XENLA			P22845|H10A_XENLA Histone H1.0-A OS=Xenopus laevis (African clawed frog)	1.5e-23	PREDICTED: histone H1-delta-like, partial [Hydra vulgaris]	1.33e-48	H10A_XENLA	FALSE	2.27908	291	1	4.55815	0	i_female_germline1,i_male_germline,i_nb1,i_nb2,i_nb4,i_nematocyte,i_neuron/gland_cell_progenitor,i_neuron_ec2,i_neuron_ec4,i_neuron_progenitor,i_SC,i_stem_cell/progenitor	germ line,interstitial,ectoderm	i_female_germline,i_male_germline,i_nb,i_nematocyte,i_neuron_progenitor,i_neuron_ec,i_SC,i_stem_cell_progenitor	body,head,nerve net
t38016aep	t38016aep					nematoblast-specific protein nb039a-sv5, partial [Hydra vulgaris]	1.71e-41		FALSE	2.27829	292	2	4.1471	0.409473	i_nb3,i_nb4,i_nb5	interstitial	i_nb	body
t23845aep	t23845aep|TENX_HUMAN	PF00092.28;PF00090.19;PF13519.6;PF12947.7	VWA;TSP_1;VWA_2;EGF_3	P22105|TENX_HUMAN Tenascin-X OS=Homo sapiens (Human)	5.2e-34	PREDICTED: uncharacterized protein LOC100210856, partial [Hydra vulgaris]	0	TENX_HUMAN	FALSE	2.27403	293	2	4.32326	0.224801	ecEp_battery_cell1(mp),ecEp_battery_cell2(mp),ecEp_head,ecEp_stem_cell	ectoderm	ecEp_battery_cell,ecEp_head,ecEp_stem_cell	head,body
t6392aep	t6392aep|SAP_CHICK	PF05184.15;PF03489.17;PF11938.8;PF13023.6	SapB_1;SapB_2;DUF3456;HD_3	O13035|SAP_CHICK Prosaposin OS=Gallus gallus (Chicken)	4.76e-41	PREDICTED: prosaposin-like isoform X1 [Hydra vulgaris]	0	SAP_CHICK	FALSE	2.26705	294	1	4.44469	0.0894039	ecEp_battery_cell1(mp),ecEp_battery_cell2(mp),enEp-nb(pd),enEp-nem(pd),enEp_foot,enEp_head,enEp_SC1,enEp_stem_cell,enEp_tent-nem(pd),enEp_tentacle	ectoderm,endoderm	ecEp_battery_cell,enEp-nb,enEp-nem,enEp_foot,enEp_head,enEp_SC1,enEp_stem_cell,enEp_tent-nem,enEp_tentacle	head,body,foot
t15507aep	t15507aep|VDAC2_MELGA	PF01459.22	Porin_3	P82013|VDAC2_MELGA Voltage-dependent anion-selective channel protein 2 OS=Meleagris gallopavo (Common turkey)	1.65e-106	PREDICTED: voltage-dependent anion-selective channel protein 2-like [Hydra vulgaris]	0	VDAC2_MELGA	FALSE	2.25464	296	2	3.83534	0.673932	ecEp_battery_cell1(mp),ecEp_head,ecEp_stem_cell,i_neuron_progenitor	ectoderm,interstitial	ecEp_battery_cell,ecEp_head,ecEp_stem_cell,i_neuron_progenitor	head,body
t19394aep	t19394aep|RL14_PIG	PF01929.17	Ribosomal_L14e	A1XQU3|RL14_PIG 60S ribosomal protein L14 OS=Sus scrofa (Pig)	2.76e-32	PREDICTED: 60S ribosomal protein L14-like [Hydra vulgaris]	4.12e-87	RL14_PIG	FALSE	2.16371	301	2	3.88989	0.437532	i_nb1,i_nb2,i_neuron/gland_cell_progenitor,i_neuron_progenitor,i_SC,i_stem_cell/progenitor	interstitial	i_nb,i_neuron_progenitor,i_SC,i_stem_cell_progenitor	body
t10222aep	t10222aep|MYS_ARGIR	PF00063.21;PF01576.19;PF02736.19	Myosin_head;Myosin_tail_1;Myosin_N	P24733|MYS_ARGIR Myosin heavy chain, striated muscle OS=Argopecten irradians (Bay scallop) (Aequipecten irradians)	0	PREDICTED: myosin heavy chain, striated muscle-like [Hydra vulgaris]	0	MYS_ARGIR	FALSE	2.14079	302	2	3.92822	0.353363	ecEp_battery_cell1(mp),ecEp_battery_cell2(mp),ecEp_head,ecEp_stem_cell,i_neuron_ec1	ectoderm	ecEp_battery_cell,ecEp_head,ecEp_stem_cell,i_neuron_ec	head,body,nerve net
t27766aep	t27766aep|ATPB_RAT	PF00006.25;PF02874.23	ATP-synt_ab;ATP-synt_ab_N	P10719|ATPB_RAT ATP synthase subunit beta, mitochondrial OS=Rattus norvegicus (Rat)	0	PREDICTED: ATP synthase subunit beta, mitochondrial [Hydra vulgaris]	0	ATPB_RAT	FALSE	2.13617	303	2	3.81106	0.461278	ecEp_head,ecEp_stem_cell,i_nb1,i_nb2,i_neuron/gland_cell_progenitor,i_neuron_progenitor,i_SC,i_stem_cell/progenitor	ectoderm,interstitial	ecEp_head,ecEp_stem_cell,i_nb,i_neuron_progenitor,i_SC,i_stem_cell_progenitor	head,body
t1693aep	t1693aep|FCA1_TRYRA	PF00036.32;PF13405.6;PF13499.6	EF-hand_1;EF-hand_6;EF-hand_7	Q27052|FCA1_TRYRA Flagellar calcium-binding protein OS=Trypanosoma rangeli	4.02e-20	PREDICTED: flagellar calcium-binding protein-like [Hydra vulgaris]	1.02e-113	FCA1_TRYRA	FALSE	2.13406	304	2	3.38403	0.884087	ecEp_basal_disk,ecEp_battery_cell1(mp),ecEp_battery_cell2(mp),ecEp_head,ecEp_stem_cell,i_neuron_ec1,i_neuron_ec3	ectoderm	ecEp_basal_disk,ecEp_battery_cell,ecEp_head,ecEp_stem_cell,i_neuron_ec	foot,head,body,nerve net
t24244aep	t24244aep					hypothetical protein CGI_10005738 [Crassostrea gigas]	1.13e-26		FALSE	2.12712	305	1	4.10266	0.15159	ecEp_head,ecEp_stem_cell	ectoderm	ecEp_head,ecEp_stem_cell	head,body
t14785aep	t14785aep|ANTA_HYDVU	PF02822.14	Antistasin	P38977|ANTA_HYDVU Antistasin OS=Hydra vulgaris (Hydra) (Hydra attenuata)	1.34e-112	PREDICTED: antistasin [Hydra vulgaris]	8.16e-111	ANTA_HYDVU	FALSE	2.11756	306	2	3.45841	0.776702	i_granular_mucous_gland_cell,i_spumous_mucous_gland_cell,i_zymogen_gland_cell	interstitial	i_granular_mucous_gland_cell,i_gland_cell	head,body
t31315aep	t31315aep|FLNA_MOUSE	PF00630.19;PF00307.31;PF07495.13;PF13115.6;PF09134.10;PF16640.5;PF16586.5	Filamin;CH;Y_Y_Y;YtkA;Invasin_D3;Big_3_5;DUF5060	Q8BTM8|FLNA_MOUSE Filamin-A OS=Mus musculus (Mouse)	0	PREDICTED: filamin-A-like [Hydra vulgaris]	0	FLNA_MOUSE	FALSE	2.08578	308	1	4.05727	0.114297	ecEp_battery_cell1(mp),ecEp_battery_cell2(mp),ecEp_head,ecEp_stem_cell,enEp-nem(pd),enEp_foot,enEp_SC1,enEp_tentacle,i_female_germline2_nurse	ectoderm,endoderm,germ line	ecEp_battery_cell,ecEp_head,ecEp_stem_cell,enEp-nem,enEp_foot,enEp_SC1,enEp_tentacle,i_female_germline	head,body,foot
t20046aep	t20046aep|TBA1_PARLI	PF00091.25;PF03953.17	Tubulin;Tubulin_C	P18258|TBA1_PARLI Tubulin alpha-1 chain OS=Paracentrotus lividus (Common sea urchin)	0	PREDICTED: tubulin alpha-1 chain [Hydra vulgaris]	0	TBA1_PARLI	FALSE	2.07556	310	2	3.54549	0.605632	ecEp_battery_cell2(mp),enEp_tent-nem(pd),i_nb5,i_nematocyte,i_neuron_ec1,i_neuron_ec2,i_neuron_ec3,i_neuron_ec4,i_neuron_ec5,i_neuron_en1,i_neuron_progenitor	ectoderm,endoderm,interstitial	ecEp_battery_cell,enEp_tent-nem,i_nb,i_nematocyte,i_neuron_ec,i_neuron_en,i_neuron_progenitor	head,body,nerve net
t29605aep	t29605aep|CATM_MOUSE	PF08246.12	Inhibitor_I29	Q9JL96|CATM_MOUSE Cathepsin M OS=Mus musculus (Mouse)	4.42e-13	PREDICTED: cathepsin L1-like [Hydra vulgaris]	2.11e-63	CATM_MOUSE	FALSE	2.07456	311	2	3.4886	0.660518	enEp-nb(pd),enEp-nem(pd),enEp_foot,enEp_head,enEp_SC1,enEp_stem_cell,enEp_tent-nem(pd),enEp_tentacle	endoderm	enEp-nb,enEp-nem,enEp_foot,enEp_head,enEp_SC1,enEp_stem_cell,enEp_tent-nem,enEp_tentacle	body,head,foot
t5163aep	t5163aep|PTBP3_HUMAN	PF13893.6;PF00076.22;PF11835.8;PF16842.5	RRM_5;RRM_1;RRM_8;RRM_occluded	O95758|PTBP3_HUMAN Polypyrimidine tract-binding protein 3 OS=Homo sapiens (Human)	5.13e-142	PREDICTED: polypyrimidine tract-binding protein 1-like [Hydra vulgaris] >gi|828229251|ref|XP_012564495.1| PREDICTED: polypyrimidine tract-binding protein 1-like [Hydra vulgaris]	0	PTBP3_HUMAN	FALSE	2.07388	312	2	3.84613	0.301625	ecEp_battery_cell1(mp),ecEp_battery_cell2(mp),ecEp_head,ecEp_stem_cell,enEp_tent-nem(pd),enEp_tentacle	ectoderm,endoderm	ecEp_battery_cell,ecEp_head,ecEp_stem_cell,enEp_tent-nem,enEp_tentacle	head,body
t33221aep	t33221aep|MP62_LYTPI	PF03066.15	Nucleoplasmin	P91753|MP62_LYTPI Mitotic apparatus protein p62 OS=Lytechinus pictus (Painted sea urchin)	4.27e-19	PREDICTED: nucleoplasmin-like protein ANO39 [Hydra vulgaris]	2.56e-160	MP62_LYTPI	FALSE	2.05817	314	2	3.69192	0.424412	i_female_germline1,i_nb1,i_nb2,i_neuron/gland_cell_progenitor,i_stem_cell/progenitor	germ line,interstitial	i_female_germline,i_nb,i_neuron_progenitor,i_stem_cell_progenitor	body
t30810aep	t30810aep|LTBP4_HUMAN	PF07645.15;PF12662.7;PF12947.7;PF00008.27;PF12661.7;PF14670.6	EGF_CA;cEGF;EGF_3;EGF;hEGF;FXa_inhibition	Q8N2S1|LTBP4_HUMAN Latent-transforming growth factor beta-binding protein 4 OS=Homo sapiens (Human)	5.04e-47	PREDICTED: fibrillin-1-like [Hydra vulgaris]	0	LTBP4_HUMAN	FALSE	2.04474	315	2	3.77728	0.312201	ecEp_battery_cell1(mp),ecEp_battery_cell2(mp),ecEp_head,ecEp_stem_cell	ectoderm	ecEp_battery_cell,ecEp_head,ecEp_stem_cell	head,body
t15583aep	t15583aep|CAP_HYDVD	PF01213.19;PF08603.11	CAP_N;CAP_C	P40122|CAP_HYDVD Adenylyl cyclase-associated protein OS=Hydra viridissima (Green hydra) (Chlorohydra viridissima)	0	PREDICTED: adenylyl cyclase-associated protein-like [Hydra vulgaris]	0	CAP_HYDVD	FALSE	2.03968	316	2	3.45837	0.620982	ecEp_battery_cell1(mp),ecEp_battery_cell2(mp),ecEp_head,ecEp_stem_cell,enEp_foot,enEp_tent-nem(pd),enEp_tentacle,i_nematocyte	ectoderm,endoderm,interstitial	ecEp_battery_cell,ecEp_head,ecEp_stem_cell,enEp_foot,enEp_tent-nem,enEp_tentacle,i_nematocyte	head,body,foot
t31713aep	t31713aep|TBA_NOTVI	PF00091.25;PF03953.17	Tubulin;Tubulin_C	Q91060|TBA_NOTVI Tubulin alpha chain OS=Notophthalmus viridescens (Eastern newt) (Triturus viridescens)	0	PREDICTED: tubulin alpha chain-like [Hydra vulgaris]	0	TBA_NOTVI	FALSE	2.02743	317	2	3.47059	0.584272	ecEp_basal_disk,ecEp_battery_cell1(mp),ecEp_battery_cell2(mp),ecEp_head,ecEp_stem_cell	ectoderm	ecEp_basal_disk,ecEp_battery_cell,ecEp_head,ecEp_stem_cell	foot,head,body
t24303aep	t24303aep|RL35A_PONAB	PF01247.18	Ribosomal_L35Ae	Q5R8K6|RL35A_PONAB 60S ribosomal protein L35a OS=Pongo abelii (Sumatran orangutan) (Pongo pygmaeus abelii)	5.52e-34	60S ribosomal protein L35a-like [Hydra vulgaris] >gi|221104273|ref|XP_002162566.1| PREDICTED: 60S ribosomal protein L35a-like [Hydra vulgaris] >gi|221117713|ref|XP_002157759.1| PREDICTED: 60S ribosomal protein L35a-like [Hydra vulgaris] >gi|221117717|ref|XP_002157723.1| PREDICTED: 60S ribosomal protein L35a-like [Hydra vulgaris] >gi|83595149|gb|ABC25032.1| ribosomal protein L35A [Hydra vulgaris]	2.87e-60	RL35A_PONAB	FALSE	2.02562	318	2	3.48597	0.565274	i_female_germline1,i_nb1,i_nb2,i_neuron/gland_cell_progenitor,i_neuron_progenitor,i_stem_cell/progenitor	germ line,interstitial	i_female_germline,i_nb,i_neuron_progenitor,i_stem_cell_progenitor	body
t761aep	t761aep|RS14_PODCA	PF00411.19	Ribosomal_S11	Q08699|RS14_PODCA 40S ribosomal protein S14 OS=Podocoryna carnea (Jellyfish)	2.33e-90	PREDICTED: 40S ribosomal protein S14 [Hydra vulgaris]	1.72e-92	RS14_PODCA	FALSE	2.02425	319	2	3.81957	0.228937	i_nb1,i_nb2,i_neuron/gland_cell_progenitor,i_neuron_progenitor,i_SC,i_stem_cell/progenitor	interstitial	i_nb,i_neuron_progenitor,i_SC,i_stem_cell_progenitor	body
t15544aep	t15544aep|MYPH_ECHGR	PF00307.31;PF00402.18	CH;Calponin	Q24799|MYPH_ECHGR Myophilin OS=Echinococcus granulosus (Hydatid tapeworm)	8.61e-49	PREDICTED: myophilin-like [Hydra vulgaris]	4.96e-137	MYPH_ECHGR	FALSE	2.00647	320	2	3.81144	0.201499	enEp-nb(pd),enEp-nem(pd),enEp_foot,enEp_head,enEp_SC1,enEp_stem_cell,enEp_tent-nem(pd),enEp_tentacle	endoderm	enEp-nb,enEp-nem,enEp_foot,enEp_head,enEp_SC1,enEp_stem_cell,enEp_tent-nem,enEp_tentacle	body,head,foot
t13807aep	t13807aep|PDI21_ARATH	PF00085.20;PF07749.12;PF13098.6	Thioredoxin;ERp29;Thioredoxin_2	O22263|PDI21_ARATH Protein disulfide-isomerase like 2-1 OS=Arabidopsis thaliana (Mouse-ear cress)	1.69e-62	PREDICTED: probable protein disulfide-isomerase A6 [Hydra vulgaris]	2.7e-163	PDI21_ARATH	FALSE	1.99544	322	2	3.31944	0.671446	ecEp_battery_cell1(mp),ecEp_head,ecEp_stem_cell	ectoderm	ecEp_battery_cell,ecEp_head,ecEp_stem_cell	head,body
t18893aep	t18893aep|ENPL_BOVIN	PF00183.18;PF02518.26;PF13589.6	HSP90;HATPase_c;HATPase_c_3	Q95M18|ENPL_BOVIN Endoplasmin OS=Bos taurus (Bovine)	0	PREDICTED: endoplasmin-like [Hydra vulgaris]	0	ENPL_BOVIN	FALSE	1.97946	323	2	3.66652	0.2924	i_female_germline2_nurse,i_nb2,i_nb3,i_nb4,i_nb5,i_neuron_ec2	germ line,interstitial,ectoderm	i_female_germline,i_nb,i_neuron_ec	body,nerve net
t16356aep	t16356aep					arminin 17593 [Hydra vulgaris]	4.28e-08		FALSE	1.97052	324	2	3.46697	0.474071	enEp-nb(pd),enEp-nem(pd),enEp_SC1,enEp_stem_cell	endoderm	enEp-nb,enEp-nem,enEp_SC1,enEp_stem_cell	body,head
t30971aep	t30971aep|NUCL1_ORYSJ	PF00076.22	RRM_1	Q6Z1C0|NUCL1_ORYSJ Nucleolin 1 OS=Oryza sativa subsp	4.33e-18	PREDICTED: nucleolin 2-like isoform X1 [Hydra vulgaris]	5.05e-135	NUCL1_ORYSJ	FALSE	1.96599	325	2	3.65964	0.272337	i_female_germline1,i_nb1,i_nb2,i_neuron/gland_cell_progenitor,i_stem_cell/progenitor	germ line,interstitial	i_female_germline,i_nb,i_neuron_progenitor,i_stem_cell_progenitor	body
t605aep	t605aep								FALSE	1.96579	326	2	3.13534	0.796246	i_neuron_ec1	ectoderm	i_neuron_ec	nerve net
t26211aep	t26211aep					PREDICTED: zebra isoform X1 [Hydra vulgaris]	0		FALSE	1.95697	328	2	3.37257	0.541369	i_granular_mucous_gland_cell,i_zymogen_gland_cell	interstitial	i_granular_mucous_gland_cell,i_gland_cell	head,body
t8499aep	t8499aep|TIAR_HUMAN	PF00076.22;PF16842.5;PF14605.6	RRM_1;RRM_occluded;Nup35_RRM_2	Q01085|TIAR_HUMAN Nucleolysin TIAR OS=Homo sapiens (Human)	6.19e-57	PREDICTED: nucleolysin TIAR-like [Hydra vulgaris]	0	TIAR_HUMAN	FALSE	1.94594	330	2	3.40122	0.490656	i_nb1,i_nb2,i_SC,i_stem_cell/progenitor	interstitial	i_nb,i_SC,i_stem_cell_progenitor	body
t20703aep	t20703aep|GILT_BOVIN	PF03227.16;PF02199.15	GILT;SapA	A6QPN6|GILT_BOVIN Gamma-interferon-inducible lysosomal thiol reductase OS=Bos taurus (Bovine)	1.07e-44	PREDICTED: gamma-interferon-inducible lysosomal thiol reductase-like [Hydra vulgaris]	0	GILT_BOVIN	FALSE	1.94165	331	2	3.32314	0.560165	ecEp_battery_cell1(mp),ecEp_battery_cell2(mp),enEp-nb(pd),enEp-nem(pd),enEp_foot,enEp_head,enEp_SC1,enEp_stem_cell,enEp_tent-nem(pd),enEp_tentacle	ectoderm,endoderm	ecEp_battery_cell,enEp-nb,enEp-nem,enEp_foot,enEp_head,enEp_SC1,enEp_stem_cell,enEp_tent-nem,enEp_tentacle	head,body,foot
t21648aep	t21648aep|SRSF6_RAT	PF00076.22	RRM_1	G3V6S8|SRSF6_RAT Serine/arginine-rich splicing factor 6 OS=Rattus norvegicus (Rat)	6.56e-50	PREDICTED: serine/arginine-rich splicing factor 6-like isoform X2 [Hydra vulgaris]	5.66e-119	SRSF6_RAT	FALSE	1.9358	333	1	3.8716	0	i_female_germline1,i_male_germline,i_nb1,i_neuron/gland_cell_progenitor,i_neuron_progenitor,i_stem_cell/progenitor	germ line,interstitial	i_female_germline,i_male_germline,i_nb,i_neuron_progenitor,i_stem_cell_progenitor	body
t31474aep	t31474aep								FALSE	1.91788	336	2	3.10726	0.728508	i_nb3	interstitial	i_nb	body
t18001aep	t18001aep|RHOAC_DANRE	PF00071.22;PF08477.13;PF00025.21	Ras;Roc;Arf	Q7T2E8|RHOAC_DANRE Rho-related GTP-binding protein RhoA-C {ECO:0000305} OS=Danio rerio (Zebrafish) (Brachydanio rerio)	6.48e-121	PREDICTED: ras-like GTP-binding protein Rho1 [Hydra vulgaris]	3.19e-128	RHOAC_DANRE	FALSE	1.90351	337	2	3.137	0.670026	ecEp_battery_cell1(mp),enEp_tentacle	ectoderm,endoderm	ecEp_battery_cell,enEp_tentacle	head
t1699aep	t1699aep|ARC1A_RAT	PF00400.32;PF12894.7	WD40;ANAPC4_WD40	Q99PD4|ARC1A_RAT Actin-related protein 2/3 complex subunit 1A OS=Rattus norvegicus (Rat)	1.16e-151	PREDICTED: actin-related protein 2/3 complex subunit 1A-like [Hydra vulgaris]	0	ARC1A_RAT	FALSE	1.88217	338	2	2.8583	0.906037	ecEp_battery_cell1(mp),ecEp_battery_cell2(mp),ecEp_head,ecEp_stem_cell,enEp-nem(pd),enEp_foot,enEp_head,enEp_SC1,enEp_stem_cell,enEp_tent-nem(pd),enEp_tentacle	ectoderm,endoderm	ecEp_battery_cell,ecEp_head,ecEp_stem_cell,enEp-nem,enEp_foot,enEp_head,enEp_SC1,enEp_stem_cell,enEp_tent-nem,enEp_tentacle	head,body,foot
t19367aep	t19367aep|RHOAC_DANRE	PF00071.22;PF08477.13;PF00025.21	Ras;Roc;Arf	Q7T2E8|RHOAC_DANRE Rho-related GTP-binding protein RhoA-C {ECO:0000305} OS=Danio rerio (Zebrafish) (Brachydanio rerio)	7.7e-119	PREDICTED: ras-like GTP-binding protein RHO [Hydra vulgaris]	8.27e-127	RHOAC_DANRE	FALSE	1.87333	339	2	3.35356	0.3931	ecEp_battery_cell1(mp),ecEp_battery_cell2(mp),ecEp_head,enEp-nem(pd),enEp_foot,enEp_head,enEp_SC1,enEp_stem_cell,enEp_tentacle	ectoderm,endoderm	ecEp_battery_cell,ecEp_head,enEp-nem,enEp_foot,enEp_head,enEp_SC1,enEp_stem_cell,enEp_tentacle	head,foot,body
t4922aep	t4922aep	PF00876.18	Innexin			innexin inx1-like [Hydra vulgaris] >gi|828223441|ref|XP_012562635.1| PREDICTED: innexin inx1-like isoform X1 [Hydra vulgaris] >gi|828223443|ref|XP_012562636.1| PREDICTED: innexin inx1-like isoform X1 [Hydra vulgaris] >gi|86769609|gb|ABD15177.1| innexin 1 [Hydra vulgaris]	0		FALSE	1.84075	341	2	3.33097	0.350529	ecEp_basal_disk,ecEp_battery_cell1(mp),ecEp_battery_cell2(mp),ecEp_head,ecEp_stem_cell,enEp-nem(pd),enEp_foot,enEp_head,enEp_SC1,enEp_stem_cell,enEp_tent-nem(pd),enEp_tentacle	ectoderm,endoderm	ecEp_basal_disk,ecEp_battery_cell,ecEp_head,ecEp_stem_cell,enEp-nem,enEp_foot,enEp_head,enEp_SC1,enEp_stem_cell,enEp_tent-nem,enEp_tentacle	foot,head,body
t12602aep	t12602aep|A4_CAEEL	PF12925.7;PF02177.16;PF12924.7;PF10515.9	APP_E2;APP_N;APP_Cu_bd;APP_amyloid	Q10651|A4_CAEEL Beta-amyloid-like protein {ECO:0000305} OS=Caenorhabditis elegans	8.06e-55	PREDICTED: beta-amyloid-like protein [Hydra vulgaris]	0	A4_CAEEL	FALSE	1.82685	342	2	3.42961	0.2241	ecEp_basal_disk,ecEp_battery_cell1(mp),ecEp_battery_cell2(mp),ecEp_head,ecEp_stem_cell,i_nematocyte,i_neuron_ec1,i_neuron_ec2,i_neuron_ec3,i_neuron_ec4,i_neuron_en1	ectoderm,interstitial,endoderm	ecEp_basal_disk,ecEp_battery_cell,ecEp_head,ecEp_stem_cell,i_nematocyte,i_neuron_ec,i_neuron_en	foot,head,body,nerve net
t4541aep	t4541aep|CSP1_ARATH	PF00098.23;PF04774.15;PF13696.6;PF13917.6	zf-CCHC;HABP4_PAI-RBP1;zf-CCHC_2;zf-CCHC_3	O65639|CSP1_ARATH Cold shock protein 1 OS=Arabidopsis thaliana (Mouse-ear cress)	1.43e-18	PREDICTED: circumsporozoite protein-like isoform X1 [Hydra vulgaris]	0	CSP1_ARATH	FALSE	1.79882	344	1	3.47663	0.121013	i_female_germline1,i_nb1,i_neuron/gland_cell_progenitor,i_stem_cell/progenitor	germ line,interstitial	i_female_germline,i_nb,i_neuron_progenitor,i_stem_cell_progenitor	body
t11584aep	t11584aep|C1QBP_RAT	PF02330.16	MAM33	O35796|C1QBP_RAT Complement component 1 Q subcomponent-binding protein, mitochondrial OS=Rattus norvegicus (Rat)	2.67e-22	PREDICTED: complement component 1 Q subcomponent-binding protein, mitochondrial-like [Hydra vulgaris]	7.47e-141	C1QBP_RAT	FALSE	1.79736	345	2	3.3304	0.264326	i_female_germline1,i_female_germline2_nurse,i_nb1,i_neuron/gland_cell_progenitor,i_stem_cell/progenitor	germ line,interstitial	i_female_germline,i_nb,i_neuron_progenitor,i_stem_cell_progenitor	body
t5048aep	t5048aep|PDIA1_RABIT	PF00085.20;PF13848.6;PF04756.13;PF13098.6;PF13905.6;PF13899.6;PF00578.21;PF01216.17	Thioredoxin;Thioredoxin_6;OST3_OST6;Thioredoxin_2;Thioredoxin_8;Thioredoxin_7;AhpC-TSA;Calsequestrin	P21195|PDIA1_RABIT Protein disulfide-isomerase OS=Oryctolagus cuniculus (Rabbit)	4.27e-174	Protein disulfide-isomerase [Exaiptasia pallida]	0	PDIA1_RABIT	FALSE	1.77981	348	2	3.34023	0.219385	ecEp_basal_disk,i_female_germline2_nurse,i_granular_mucous_gland_cell,i_nb2,i_nb3,i_nb4,i_nb5,i_neuron_en1,i_neuron_en2,i_neuron_en3,i_spumous_mucous_gland_cell,i_zymogen_gland_cell	ectoderm,germ line,interstitial,endoderm	ecEp_basal_disk,i_female_germline,i_granular_mucous_gland_cell,i_nb,i_neuron_en,i_gland_cell	foot,body,head,nerve net
t8331aep	t8331aep|SRSF7_HUMAN	PF00076.22;PF00098.23	RRM_1;zf-CCHC	Q16629|SRSF7_HUMAN Serine/arginine-rich splicing factor 7 OS=Homo sapiens (Human)	1.27e-25	PREDICTED: probable splicing factor, arginine/serine-rich 6 [Hydra vulgaris]	2.62e-57	SRSF7_HUMAN	FALSE	1.77773	349	2	3.32547	0.22999	i_female_germline1,i_nb1,i_nb2,i_neuron/gland_cell_progenitor,i_neuron_progenitor,i_stem_cell/progenitor	germ line,interstitial	i_female_germline,i_nb,i_neuron_progenitor,i_stem_cell_progenitor	body
t14454aep	t14454aep								FALSE	1.76878	350	2	2.10808	1.42948	i_nb2,i_nb3,i_nb4,i_nb5,i_nematocyte	interstitial	i_nb,i_nematocyte	body,head
t4961aep	t4961aep|MP20_DROME	PF00307.31;PF00402.18	CH;Calponin	P14318|MP20_DROME Muscle-specific protein 20 OS=Drosophila melanogaster (Fruit fly)	2.96e-43	PREDICTED: muscle-specific protein 20-like [Hydra vulgaris]	4.01e-134	MP20_DROME	FALSE	1.75103	353	2	2.31276	1.18929	enEp-nb(pd),enEp-nem(pd),enEp_foot,enEp_head,enEp_SC1,enEp_stem_cell,enEp_tent-nem(pd),enEp_tentacle	endoderm	enEp-nb,enEp-nem,enEp_foot,enEp_head,enEp_SC1,enEp_stem_cell,enEp_tent-nem,enEp_tentacle	body,head,foot
t7202aep	t7202aep|VIGLN_HUMAN	PF00013.29;PF07650.17;PF14611.6;PF13184.6	KH_1;KH_2;SLS;KH_5	Q00341|VIGLN_HUMAN Vigilin OS=Homo sapiens (Human)	0	PREDICTED: vigilin [Hydra vulgaris]	0	VIGLN_HUMAN	FALSE	1.74761	354	2	3.12558	0.369648	ecEp_basal_disk,ecEp_battery_cell1(mp),ecEp_battery_cell2(mp),ecEp_head,ecEp_stem_cell,enEp_tent-nem(pd),enEp_tentacle,i_nb2	ectoderm,endoderm,interstitial	ecEp_basal_disk,ecEp_battery_cell,ecEp_head,ecEp_stem_cell,enEp_tent-nem,enEp_tentacle,i_nb	foot,head,body
t21915aep	t21915aep|MCPI_MELCP	PF07648.15;PF00050.21	Kazal_2;Kazal_1	P82968|MCPI_MELCP Four-domain proteases inhibitor OS=Melithaea caledonica	2.08e-28	putative serine protease inhibitor [Hydra vulgaris]	6.53e-115	MCPI_MELCP	FALSE	1.73978	355	2	3.11373	0.365824	i_female_germline2_nurse,i_zymogen_gland_cell	germ line,interstitial	i_female_germline,i_gland_cell	body
t37152aep	t37152aep|MACF1_HUMAN	PF00435.21;PF02187.17	Spectrin;GAS2	Q9UPN3|MACF1_HUMAN Microtubule-actin cross-linking factor 1, isoforms 1/2/3/5 OS=Homo sapiens (Human)	0	PREDICTED: microtubule-actin cross-linking factor 1-like, partial [Hydra vulgaris]	0	MACF1_HUMAN	FALSE	1.7344	357	1	3.29814	0.170667	ecEp_basal_disk,ecEp_battery_cell1(mp),ecEp_battery_cell2(mp),ecEp_head,ecEp_stem_cell	ectoderm	ecEp_basal_disk,ecEp_battery_cell,ecEp_head,ecEp_stem_cell	foot,head,body
t14977aep	t14977aep|FRIS_LYMST	PF00210.24	Ferritin	P42577|FRIS_LYMST Soma ferritin OS=Lymnaea stagnalis (Great pond snail) (Helix stagnalis)	2.21e-70	PREDICTED: soma ferritin-like [Hydra vulgaris]	5.16e-121	FRIS_LYMST	FALSE	1.72744	358	2	2.76762	0.68725	ecEp_basal_disk,ecEp_battery_cell1(mp),ecEp_battery_cell2(mp),ecEp_head,ecEp_stem_cell,enEp_tent-nem(pd),enEp_tentacle	ectoderm,endoderm	ecEp_basal_disk,ecEp_battery_cell,ecEp_head,ecEp_stem_cell,enEp_tent-nem,enEp_tentacle	foot,head,body
t10890aep	t10890aep|MMP24_HUMAN	PF00413.24;PF00045.19;PF01471.18	Peptidase_M10;Hemopexin;PG_binding_1	Q9Y5R2|MMP24_HUMAN Matrix metalloproteinase-24 OS=Homo sapiens (Human)	2.7e-55	PREDICTED: matrix metalloproteinase-14-like [Hydra vulgaris]	0	MMP24_HUMAN	FALSE	1.72267	359	1	3.24658	0.198756	enEp-nb(pd),enEp-nem(pd),enEp_foot,enEp_head,enEp_SC1,enEp_stem_cell	endoderm	enEp-nb,enEp-nem,enEp_foot,enEp_head,enEp_SC1,enEp_stem_cell	body,head,foot
t16590aep	t16590aep|UBCD1_DROME	PF00179.26	UQ_con	P25867|UBCD1_DROME Ubiquitin-conjugating enzyme E2-17 kDa OS=Drosophila melanogaster (Fruit fly)	2.46e-89	PREDICTED: ubiquitin-conjugating enzyme E2-17 kDa [Hydra vulgaris]	1.02e-101	UBCD1_DROME	FALSE	1.71584	360	2	2.66208	0.769593	i_neuron/gland_cell_progenitor,i_SC,i_stem_cell/progenitor	interstitial	i_neuron_progenitor,i_SC,i_stem_cell_progenitor	body
t15682aep	t15682aep|LAMP1_RAT			P14562|LAMP1_RAT Lysosome-associated membrane glycoprotein 1 OS=Rattus norvegicus (Rat)	8.23e-15	PREDICTED: lysosome-associated membrane glycoprotein 1-like [Hydra vulgaris]	1.01e-113	LAMP1_RAT	FALSE	1.70279	361	2	2.50133	0.904244	ecEp_battery_cell1(mp),ecEp_battery_cell2(mp),enEp-nb(pd),enEp-nem(pd),enEp_foot,enEp_head,enEp_SC1,enEp_stem_cell,enEp_tent-nem(pd),enEp_tentacle	ectoderm,endoderm	ecEp_battery_cell,enEp-nb,enEp-nem,enEp_foot,enEp_head,enEp_SC1,enEp_stem_cell,enEp_tent-nem,enEp_tentacle	head,body,foot
t21802aep	t21802aep|FLNA_HUMAN	PF00630.19;PF07495.13	Filamin;Y_Y_Y	P21333|FLNA_HUMAN Filamin-A OS=Homo sapiens (Human)	0	PREDICTED: filamin-A-like [Hydra vulgaris]	0	FLNA_HUMAN	FALSE	1.69768	362	1	3.25266	0.142706	ecEp_battery_cell1(mp),ecEp_battery_cell2(mp),ecEp_head,ecEp_stem_cell,i_female_germline2_nurse	ectoderm,germ line	ecEp_battery_cell,ecEp_head,ecEp_stem_cell,i_female_germline	head,body
t19390aep	t19390aep|DNJA2_BOVIN	PF01556.18;PF00226.31;PF00684.19	DnaJ_C;DnaJ;DnaJ_CXXCXGXG	Q2HJ94|DNJA2_BOVIN DnaJ homolog subfamily A member 2 OS=Bos taurus (Bovine)	1.2e-112	PREDICTED: dnaJ homolog subfamily A member 2 [Austrofundulus limnaeus]	1.56e-113	DNJA2_BOVIN	FALSE	1.69011	363	2	2.973	0.407221	ecEp_battery_cell1(mp),ecEp_battery_cell2(mp),ecEp_stem_cell	ectoderm	ecEp_battery_cell,ecEp_stem_cell	head,body
t16825aep	t16825aep|RADI_MOUSE	PF00769.19;PF00373.18;PF09380.10;PF09379.10	ERM;FERM_M;FERM_C;FERM_N	P26043|RADI_MOUSE Radixin OS=Mus musculus (Mouse)	0	PREDICTED: radixin-like [Hydra vulgaris]	0	RADI_MOUSE	FALSE	1.6751	365	2	3.06559	0.284605	enEp-nem(pd),enEp_foot,enEp_head,enEp_SC1,enEp_stem_cell,enEp_tentacle,i_neuron_ec5,i_neuron_en1,i_neuron_en2,i_neuron_en3,i_neuron_progenitor	endoderm,ectoderm,interstitial	enEp-nem,enEp_foot,enEp_head,enEp_SC1,enEp_stem_cell,enEp_tentacle,i_neuron_ec,i_neuron_en,i_neuron_progenitor	head,foot,body,nerve net
t24332aep	t24332aep|SUI1_SALBA	PF01253.22	SUI1	O48650|SUI1_SALBA Protein translation factor SUI1 homolog OS=Salix bakko (Japanese willow)	4.64e-33	PREDICTED: eukaryotic translation initiation factor 1-like [Hydra vulgaris]	6.41e-71	SUI1_SALBA	FALSE	1.65703	367	2	2.73123	0.582839	ecEp_battery_cell1(mp),ecEp_battery_cell2(mp),i_neuron_progenitor	ectoderm,interstitial	ecEp_battery_cell,i_neuron_progenitor	head,body
t29558aep	t29558aep|ROA2_PONAB	PF00076.22	RRM_1	Q5RBU8|ROA2_PONAB Heterogeneous nuclear ribonucleoproteins A2/B1 OS=Pongo abelii (Sumatran orangutan) (Pongo pygmaeus abelii)	1.36e-36	PREDICTED: heterogeneous nuclear ribonucleoprotein A2 homolog 2-like [Hydra vulgaris]	5.51e-134	ROA2_PONAB	FALSE	1.64258	369	1	3.28517	0	i_nb1,i_nb2,i_neuron/gland_cell_progenitor,i_neuron_progenitor,i_stem_cell/progenitor	interstitial	i_nb,i_neuron_progenitor,i_stem_cell_progenitor	body
t20185aep	t20185aep|KAD2_DANRE	PF00406.22;PF13207.6;PF05191.14	ADK;AAA_17;ADK_lid	Q1L8L9|KAD2_DANRE Adenylate kinase 2, mitochondrial {ECO:0000255|HAMAP-Rule:MF_03168} OS=Danio rerio (Zebrafish) (Brachydanio rerio)	1.3e-107	PREDICTED: adenylate kinase 2, mitochondrial-like [Hydra vulgaris]	2.98e-173	KAD2_DANRE	FALSE	1.6421	371	2	2.94391	0.340291	ecEp_head,ecEp_stem_cell,enEp_SC1,enEp_stem_cell	ectoderm,endoderm	ecEp_head,ecEp_stem_cell,enEp_SC1,enEp_stem_cell	head,body
t12059aep	t12059aep|UB2L3_MOUSE	PF00179.26	UQ_con	P68037|UB2L3_MOUSE Ubiquitin-conjugating enzyme E2 L3 OS=Mus musculus (Mouse)	7.96e-70	PREDICTED: ubiquitin-conjugating enzyme E2 L3-like [Hydra vulgaris]	3.29e-94	UB2L3_MOUSE	FALSE	1.63772	372	2	2.56082	0.714615	enEp-nb(pd),enEp-nem(pd),enEp_foot,enEp_head,enEp_SC1,enEp_stem_cell	endoderm	enEp-nb,enEp-nem,enEp_foot,enEp_head,enEp_SC1,enEp_stem_cell	body,head,foot
t19456aep	t19456aep|DHE3_RAT	PF02812.18;PF00208.21	ELFV_dehydrog_N;ELFV_dehydrog	P10860|DHE3_RAT Glutamate dehydrogenase 1, mitochondrial OS=Rattus norvegicus (Rat)	0	PREDICTED: glutamate dehydrogenase, mitochondrial-like [Hydra vulgaris]	0	DHE3_RAT	FALSE	1.63614	373	1	3.15885	0.113424	ecEp_battery_cell1(mp),ecEp_battery_cell2(mp),ecEp_head,ecEp_stem_cell,i_female_germline2_nurse	ectoderm,germ line	ecEp_battery_cell,ecEp_head,ecEp_stem_cell,i_female_germline	head,body
t36743aep	t36743aep								FALSE	1.61436	375	1	3.22872	0	i_female_germline1,i_nb1,i_nb2,i_neuron/gland_cell_progenitor,i_stem_cell/progenitor	germ line,interstitial	i_female_germline,i_nb,i_neuron_progenitor,i_stem_cell_progenitor	body
t17325aep	t17325aep|FHL2_HUMAN	PF00412.22	LIM	Q14192|FHL2_HUMAN Four and a half LIM domains protein 2 OS=Homo sapiens (Human)	2.14e-24	PREDICTED: four and a half LIM domains protein 2-like [Hydra vulgaris]	4.43e-119	FHL2_HUMAN	FALSE	1.60842	376	2	2.45312	0.763718	ecEp_basal_disk,ecEp_head,ecEp_stem_cell,enEp-nb(pd),enEp-nem(pd),enEp_foot,enEp_head,enEp_SC1,enEp_stem_cell,i_granular_mucous_gland_cell,i_spumous_mucous_gland_cell	ectoderm,endoderm,interstitial	ecEp_basal_disk,ecEp_head,ecEp_stem_cell,enEp-nb,enEp-nem,enEp_foot,enEp_head,enEp_SC1,enEp_stem_cell,i_granular_mucous_gland_cell,i_gland_cell	foot,head,body
t32605aep	t32605aep					PREDICTED: uncharacterized protein LOC105843748 [Hydra vulgaris]	0		FALSE	1.5962	378	2	1.23933	1.95306	ecEp_battery_cell1(mp),ecEp_battery_cell2(mp),ecEp_stem_cell	ectoderm	ecEp_battery_cell,ecEp_stem_cell	head,body
t5473aep	t5473aep|PLD3B_MACFA	PF04707.14	PRELI	Q4R5S9|PLD3B_MACFA PRELI domain containing protein 3B OS=Macaca fascicularis (Crab-eating macaque) (Cynomolgus monkey)	5.96e-46	PREDICTED: protein slowmo homolog 1-like [Hydra vulgaris]	0	PLD3B_MACFA	FALSE	1.59509	379	2	2.63498	0.55519	ecEp_battery_cell1(mp),ecEp_battery_cell2(mp),enEp_foot,enEp_head,enEp_stem_cell,enEp_tent-nem(pd),enEp_tentacle	ectoderm,endoderm	ecEp_battery_cell,enEp_foot,enEp_head,enEp_stem_cell,enEp_tent-nem,enEp_tentacle	head,foot,body
t3291aep	t3291aep					PREDICTED: uncharacterized protein LOC100206850 [Hydra vulgaris]	4.61e-45		FALSE	1.59066	380	2	2.37654	0.804788	enEp-nb(pd),enEp-nem(pd),enEp_foot,enEp_head,enEp_SC1,enEp_stem_cell,enEp_tent-nem(pd),enEp_tentacle	endoderm	enEp-nb,enEp-nem,enEp_foot,enEp_head,enEp_SC1,enEp_stem_cell,enEp_tent-nem,enEp_tentacle	body,head,foot
t2424aep	t2424aep|NOG1_HUMAN	PF17835.1;PF06858.14;PF01926.23;PF02421.18;PF08155.11;PF12631.7	NOG1_N;NOG1;MMR_HSR1;FeoB_N;NOGCT;MnmE_helical	Q9BZE4|NOG1_HUMAN Nucleolar GTP-binding protein 1 OS=Homo sapiens (Human)	0	PREDICTED: LOW QUALITY PROTEIN: nucleolar GTP-binding protein 1 [Hydra vulgaris]	0	NOG1_HUMAN	FALSE	1.57483	384	2	2.94124	0.208415	i_nb1,i_nb2,i_SC,i_stem_cell/progenitor	interstitial	i_nb,i_SC,i_stem_cell_progenitor	body
t19647aep	t19647aep|ACTN_ANOGA	PF00435.21;PF00307.31;PF08726.10;PF00036.32;PF11971.8;PF13405.6	Spectrin;CH;EFhand_Ca_insen;EF-hand_1;CAMSAP_CH;EF-hand_6	Q7PKQ5|ACTN_ANOGA Alpha-actinin, sarcomeric OS=Anopheles gambiae (African malaria mosquito)	0	PREDICTED: alpha-actinin, sarcomeric-like [Hydra vulgaris]	0	ACTN_ANOGA	FALSE	1.57318	385	1	2.97664	0.169727	ecEp_battery_cell1(mp),ecEp_battery_cell2(mp),ecEp_head,ecEp_stem_cell,enEp_foot,enEp_head,enEp_SC1,enEp_tent-nem(pd),enEp_tentacle	ectoderm,endoderm	ecEp_battery_cell,ecEp_head,ecEp_stem_cell,enEp_foot,enEp_head,enEp_SC1,enEp_tent-nem,enEp_tentacle	head,body,foot
t20542aep	t20542aep|HS90A_CHICK	PF00183.18	HSP90	P11501|HS90A_CHICK Heat shock protein HSP 90-alpha OS=Gallus gallus (Chicken)	4.78e-32	PREDICTED: heat shock protein HSP 90-alpha-like [Hydra vulgaris]	5.96e-50	HS90A_CHICK	FALSE	1.56937	386	1	3.13874	0	enEp_SC1	endoderm	enEp_SC1	body
t15906aep	t15906aep|ZN318_MOUSE			Q99PP2|ZN318_MOUSE Zinc finger protein 318 OS=Mus musculus (Mouse)	2.94e-07	PREDICTED: uncharacterized protein LOC100201133 [Hydra vulgaris]	0	ZN318_MOUSE	FALSE	1.56016	388	2	2.74599	0.374326	i_female_germline1,i_nb1,i_nb2,i_neuron/gland_cell_progenitor,i_neuron_progenitor,i_stem_cell/progenitor	germ line,interstitial	i_female_germline,i_nb,i_neuron_progenitor,i_stem_cell_progenitor	body
t14754aep	t14754aep|APLP_LOCMI	PF09172.11;PF01347.22;PF06448.11	DUF1943;Vitellogenin_N;DUF1081	Q9U943|APLP_LOCMI Apolipophorins OS=Locusta migratoria (Migratory locust)	4.02e-59	PREDICTED: apolipophorins-like, partial [Hydra vulgaris]	0	APLP_LOCMI	FALSE	1.55029	390	1	3.07536	0.0252166	enEp-nb(pd),enEp-nem(pd),enEp_foot,enEp_head,enEp_SC1,enEp_stem_cell,enEp_tent-nem(pd),enEp_tentacle	endoderm	enEp-nb,enEp-nem,enEp_foot,enEp_head,enEp_SC1,enEp_stem_cell,enEp_tent-nem,enEp_tentacle	body,head,foot
t5253aep	t5253aep								FALSE	1.52951	392	2	0.290431	2.76858	ecEp_battery_cell2(mp),enEp_tent-nem(pd)	ectoderm,endoderm	ecEp_battery_cell,enEp_tent-nem	head
t31900aep	t31900aep|FRIH_TREBE	PF00210.24	Ferritin	P85838|FRIH_TREBE Ferritin, heavy subunit {ECO:0000303|PubMed:18625196} OS=Trematomus bernacchii (Emerald rockcod) (Pagothenia bernacchii)	9.87e-26	PREDICTED: ferritin heavy chain-like [Hydra vulgaris] >gi|449677687|ref|XP_002155909.2| PREDICTED: ferritin heavy chain-like [Hydra vulgaris]	2.73e-141	FRIH_TREBE	FALSE	1.51542	394	1	2.9004	0.13044	enEp-nb(pd),enEp-nem(pd),enEp_foot,enEp_head,enEp_SC1,enEp_stem_cell,enEp_tent-nem(pd),enEp_tentacle	endoderm	enEp-nb,enEp-nem,enEp_foot,enEp_head,enEp_SC1,enEp_stem_cell,enEp_tent-nem,enEp_tentacle	body,head,foot
t35724aep	t35724aep|SYF2_DANRE	PF08231.12	SYF2	Q6DGP2|SYF2_DANRE Pre-mRNA-splicing factor syf2 OS=Danio rerio (Zebrafish) (Brachydanio rerio)	4.71e-77	PREDICTED: pre-mRNA-splicing factor SYF2-like [Hydra vulgaris]	0	SYF2_DANRE	FALSE	1.47458	396	2	2.4295	0.519655	i_female_germline1,i_male_germline,i_nb1,i_neuron/gland_cell_progenitor,i_neuron_progenitor,i_SC,i_stem_cell/progenitor	germ line,interstitial	i_female_germline,i_male_germline,i_nb,i_neuron_progenitor,i_SC,i_stem_cell_progenitor	body
t17999aep	t17999aep|ATP5E_ARATH	PF04627.13	ATP-synt_Eps	Q96253|ATP5E_ARATH ATP synthase subunit epsilon, mitochondrial OS=Arabidopsis thaliana (Mouse-ear cress)	3.36e-10	hym-323 [Hydra vulgaris]	4.75e-36	ATP5E_ARATH	FALSE	1.46024	398	2	2.17928	0.741205	i_neuron/gland_cell_progenitor,i_neuron_progenitor,i_SC,i_stem_cell/progenitor	interstitial	i_neuron_progenitor,i_SC,i_stem_cell_progenitor	body
t9810aep	t9810aep					PREDICTED: flocculation protein FLO11-like, partial [Hydra vulgaris]	2.18e-81		FALSE	1.45238	401	1	2.90476	0	ecEp_basal_disk	ectoderm	ecEp_basal_disk	foot
t12590aep	t12590aep|THYN1_DANRE	PF01878.18	EVE	Q6PFL8|THYN1_DANRE Thymocyte nuclear protein 1 OS=Danio rerio (Zebrafish) (Brachydanio rerio)	1.46e-71	PREDICTED: thymocyte nuclear protein 1-like [Hydra vulgaris]	1.4e-116	THYN1_DANRE	FALSE	1.45192	402	1	2.80175	0.102086	i_female_germline1,i_male_germline,i_nb1,i_nb2,i_neuron/gland_cell_progenitor,i_neuron_progenitor,i_stem_cell/progenitor	germ line,interstitial	i_female_germline,i_male_germline,i_nb,i_neuron_progenitor,i_stem_cell_progenitor	body
t24748aep	t24748aep					PREDICTED: eukaryotic translation initiation factor 3 subunit A-like [Hydra vulgaris]	7.91e-79		FALSE	1.45124	403	1	2.90249	0	i_nb1,i_neuron/gland_cell_progenitor,i_SC,i_stem_cell/progenitor	interstitial	i_nb,i_neuron_progenitor,i_SC,i_stem_cell_progenitor	body
t16779aep	t16779aep|SDCB1_HUMAN	PF17820.1;PF00595.24;PF13180.6;PF02163.22	PDZ_6;PDZ;PDZ_2;Peptidase_M50	O00560|SDCB1_HUMAN Syntenin-1 OS=Homo sapiens (Human)	1.7e-99	PREDICTED: syntenin-1-like isoform X1 [Hydra vulgaris]	0	SDCB1_HUMAN	FALSE	1.44395	406	1	2.72808	0.159812	ecEp_battery_cell1(mp),ecEp_battery_cell2(mp),enEp-nb(pd),enEp-nem(pd),enEp_foot,enEp_head,enEp_SC1,enEp_stem_cell,enEp_tent-nem(pd),enEp_tentacle,i_neuron_ec1,i_neuron_ec2	ectoderm,endoderm	ecEp_battery_cell,enEp-nb,enEp-nem,enEp_foot,enEp_head,enEp_SC1,enEp_stem_cell,enEp_tent-nem,enEp_tentacle,i_neuron_ec	head,body,foot,nerve net
t14615aep	t14615aep|HMGB2_RAT	PF00505.19;PF09011.10;PF14887.6	HMG_box;HMG_box_2;HMG_box_5	P52925|HMGB2_RAT High mobility group protein B2 OS=Rattus norvegicus (Rat)	3.69e-20	high mobility group-T protein-like [Hydra vulgaris] >gi|221120410|ref|XP_002166637.1| PREDICTED: high mobility group-T protein-like isoform X1 [Hydra vulgaris] >gi|388594888|gb|AFK74879.1| transcription factor HMG-B3b [Hydra vulgaris]	3.18e-92	HMGB2_RAT	FALSE	1.4383	407	2	2.64635	0.230255	i_female_germline1,i_male_germline,i_nb1,i_nb2,i_neuron/gland_cell_progenitor,i_neuron_progenitor,i_stem_cell/progenitor	germ line,interstitial	i_female_germline,i_male_germline,i_nb,i_neuron_progenitor,i_stem_cell_progenitor	body
t33063aep	t33063aep|GRP78_CHICK	PF00012.20;PF06723.13;PF14450.6	HSP70;MreB_Mbl;FtsA	Q90593|GRP78_CHICK 78 kDa glucose-regulated protein OS=Gallus gallus (Chicken)	0	PREDICTED: 78 kDa glucose-regulated protein-like [Hydra vulgaris]	0	GRP78_CHICK	FALSE	1.43489	408	2	2.51769	0.352092	i_female_germline2_nurse,i_nb2,i_nb3,i_nb5,i_neuron_ec1,i_neuron_ec2,i_neuron_ec4,i_neuron_en1,i_neuron_en2	germ line,interstitial,ectoderm,endoderm	i_female_germline,i_nb,i_neuron_ec,i_neuron_en	body,nerve net
t34888aep	t34888aep|LITAF_DANRE	PF10601.9	zf-LITAF-like	Q6GMG8|LITAF_DANRE Lipopolysaccharide-induced tumor necrosis factor-alpha factor homolog OS=Danio rerio (Zebrafish) (Brachydanio rerio)	7.59e-21	PREDICTED: lipopolysaccharide-induced tumor necrosis factor-alpha factor homolog [Hydra vulgaris]	5.97e-76	LITAF_DANRE	FALSE	1.43205	410	2	1.50585	1.35825	ecEp_battery_cell2(mp)	ectoderm	ecEp_battery_cell	head
t1669aep	t1669aep|CFAD_DICDI	PF00112.23;PF08246.12	Peptidase_C1;Inhibitor_I29	Q54TR1|CFAD_DICDI Counting factor associated protein D OS=Dictyostelium discoideum (Slime mold)	2.98e-84	PREDICTED: digestive cysteine proteinase 1-like [Hydra vulgaris]	0	CFAD_DICDI	FALSE	1.41566	413	1	2.66803	0.163285	enEp-nb(pd),enEp-nem(pd),enEp_foot,enEp_head,enEp_SC1,enEp_stem_cell,enEp_tent-nem(pd),enEp_tentacle	endoderm	enEp-nb,enEp-nem,enEp_foot,enEp_head,enEp_SC1,enEp_stem_cell,enEp_tent-nem,enEp_tentacle	body,head,foot
t28587aep	t28587aep					PREDICTED: titin-like [Hydra vulgaris]	9.51e-37		FALSE	1.41492	414	2	2.58032	0.249526	ecEp_basal_disk,ecEp_head,ecEp_stem_cell	ectoderm	ecEp_basal_disk,ecEp_head,ecEp_stem_cell	foot,head,body
t22768aep	t22768aep|CAPR1_HUMAN	PF18293.1	Caprin-1_dimer	Q14444|CAPR1_HUMAN Caprin-1 OS=Homo sapiens (Human)	7.96e-18	PREDICTED: caprin-1-like [Hydra vulgaris]	0	CAPR1_HUMAN	FALSE	1.4104	415	2	2.5398	0.281007	i_female_germline1,i_female_germline2_nurse,i_nb1,i_neuron/gland_cell_progenitor,i_stem_cell/progenitor	germ line,interstitial	i_female_germline,i_nb,i_neuron_progenitor,i_stem_cell_progenitor	body
t11479aep	t11479aep	PF01822.19;PF16945.5	WSC;Phage_r1t_holin			PREDICTED: uncharacterized protein LOC100207237 isoform X2 [Hydra vulgaris]	0		FALSE	1.39568	416	1	2.79136	0	ecEp_basal_disk	ectoderm	ecEp_basal_disk	foot
t12072aep	t12072aep|IPO5_MOUSE	PF18808.1;PF13646.6;PF13513.6;PF02985.22;PF18829.1;PF12755.7;PF05004.13;PF12717.7;PF11865.8	Importin_rep_4;HEAT_2;HEAT_EZ;HEAT;Importin_rep_6;Vac14_Fab1_bd;IFRD;Cnd1;DUF3385	Q8BKC5|IPO5_MOUSE Importin-5 OS=Mus musculus (Mouse)	0	PREDICTED: importin-5-like [Hydra vulgaris]	0	IPO5_MOUSE	FALSE	1.39514	417	2	2.47695	0.313326	i_nb1,i_SC,i_stem_cell/progenitor	interstitial	i_nb,i_SC,i_stem_cell_progenitor	body
t21913aep	t21913aep|MCPI_MELCP	PF00050.21;PF07648.15	Kazal_1;Kazal_2	P82968|MCPI_MELCP Four-domain proteases inhibitor OS=Melithaea caledonica	1.17e-27	kazal-type serine protease inihibitor 3 precursor [Hydra vulgaris] >gi|219881820|gb|ACL52154.1| kazal-type serine protease inihibitor 3 [Hydra vulgaris]	1.46e-105	MCPI_MELCP	FALSE	1.39498	418	1	2.78997	0	enEp_foot,enEp_head,enEp_tent-nem(pd),enEp_tentacle,i_granular_mucous_gland_cell,i_zymogen_gland_cell	endoderm,interstitial	enEp_foot,enEp_head,enEp_tent-nem,enEp_tentacle,i_granular_mucous_gland_cell,i_gland_cell	foot,head,body
t14019aep	t14019aep|CAZ_DROME	PF00076.22;PF00641.18	RRM_1;zf-RanBP	Q27294|CAZ_DROME RNA-binding protein cabeza OS=Drosophila melanogaster (Fruit fly)	8.9e-29	PREDICTED: RNA-binding protein cabeza-like [Hydra vulgaris]	3.08e-94	CAZ_DROME	FALSE	1.39376	419	1	2.6527	0.134826	i_female_germline1,i_male_germline,i_nb1,i_nb2,i_neuron/gland_cell_progenitor,i_stem_cell/progenitor	germ line,interstitial	i_female_germline,i_male_germline,i_nb,i_neuron_progenitor,i_stem_cell_progenitor	body
t28278aep	t28278aep|H10A_XENLA			P22845|H10A_XENLA Histone H1.0-A OS=Xenopus laevis (African clawed frog)	5.53e-22	PREDICTED: histone H1-delta-like [Hydra vulgaris]	4.57e-42	H10A_XENLA	FALSE	1.39068	420	1	2.78135	0	i_female_germline1,i_male_germline,i_nb1,i_nb2,i_nb4,i_nematocyte,i_neuron/gland_cell_progenitor,i_neuron_ec1,i_neuron_ec2,i_neuron_ec3,i_neuron_ec4,i_neuron_en1,i_neuron_progenitor,i_SC,i_stem_cell/progenitor	germ line,interstitial,ectoderm,endoderm	i_female_germline,i_male_germline,i_nb,i_nematocyte,i_neuron_progenitor,i_neuron_ec,i_neuron_en,i_SC,i_stem_cell_progenitor	body,head,nerve net
t13221aep	t13221aep|ROA2_PONAB	PF00076.22;PF14703.6	RRM_1;PHM7_cyt	Q5RBU8|ROA2_PONAB Heterogeneous nuclear ribonucleoproteins A2/B1 OS=Pongo abelii (Sumatran orangutan) (Pongo pygmaeus abelii)	2.62e-22	PREDICTED: heterogeneous nuclear ribonucleoprotein A0-like [Hydra vulgaris] >gi|828213640|ref|XP_012559383.1| PREDICTED: heterogeneous nuclear ribonucleoprotein A0-like [Hydra vulgaris]	6.16e-146	ROA2_PONAB	FALSE	1.38544	422	2	2.03293	0.737948	i_female_germline1,i_nb1,i_nb2,i_neuron/gland_cell_progenitor,i_neuron_progenitor,i_stem_cell/progenitor	germ line,interstitial	i_female_germline,i_nb,i_neuron_progenitor,i_stem_cell_progenitor	body
t12612aep	t12612aep|PCKGM_MOUSE	PF00821.18;PF17297.2	PEPCK_GTP;PEPCK_N	Q8BH04|PCKGM_MOUSE Phosphoenolpyruvate carboxykinase [GTP], mitochondrial OS=Mus musculus (Mouse)	0	PREDICTED: phosphoenolpyruvate carboxykinase [GTP], mitochondrial-like [Hydra vulgaris]	0	PCKGM_MOUSE	FALSE	1.38108	423	2	2.4526	0.309559	enEp-nb(pd),enEp-nem(pd),enEp_foot,enEp_head,enEp_SC1,enEp_stem_cell,i_neuron_ec1,i_neuron_ec5	endoderm,ectoderm	enEp-nb,enEp-nem,enEp_foot,enEp_head,enEp_SC1,enEp_stem_cell,i_neuron_ec	body,head,foot,nerve net
t28211aep	t28211aep|INX3_DROME	PF00876.18	Innexin	Q9VAS7|INX3_DROME Innexin inx3 OS=Drosophila melanogaster (Fruit fly)	1.3e-07	Innexin 3 [Hydra vulgaris]	0	INX3_DROME	FALSE	1.3772	424	2	2.43861	0.315784	ecEp_basal_disk,ecEp_battery_cell1(mp),ecEp_battery_cell2(mp),ecEp_head,ecEp_stem_cell,enEp_foot,enEp_head,enEp_SC1,enEp_tent-nem(pd),enEp_tentacle	ectoderm,endoderm	ecEp_basal_disk,ecEp_battery_cell,ecEp_head,ecEp_stem_cell,enEp_foot,enEp_head,enEp_SC1,enEp_tent-nem,enEp_tentacle	foot,head,body
t30697aep	t30697aep					PREDICTED: uncharacterized protein LOC100210153 [Hydra vulgaris]	6.22e-49		FALSE	1.35741	426	1	2.71482	0	enEp-nb(pd),enEp-nem(pd),enEp_foot,enEp_head,enEp_SC1,enEp_stem_cell,enEp_tent-nem(pd),enEp_tentacle	endoderm	enEp-nb,enEp-nem,enEp_foot,enEp_head,enEp_SC1,enEp_stem_cell,enEp_tent-nem,enEp_tentacle	body,head,foot
t22739aep	t22739aep|SND1_BOVIN	PF00565.17;PF00567.24	SNase;TUDOR	Q863B3|SND1_BOVIN Staphylococcal nuclease domain-containing protein 1 OS=Bos taurus (Bovine)	0	PREDICTED: staphylococcal nuclease domain-containing protein 1-like [Hydra vulgaris]	0	SND1_BOVIN	FALSE	1.34936	429	1	2.52858	0.170131	i_female_germline2_nurse,i_nb1,i_nb2,i_nb3,i_zymogen_gland_cell	germ line,interstitial	i_female_germline,i_nb,i_gland_cell	body
t37413aep	t37413aep|MACF1_HUMAN	PF00435.21;PF02187.17	Spectrin;GAS2	Q9UPN3|MACF1_HUMAN Microtubule-actin cross-linking factor 1, isoforms 1/2/3/5 OS=Homo sapiens (Human)	2.82e-134	PREDICTED: dystonin-like [Hydra vulgaris]	0	MACF1_HUMAN	FALSE	1.33395	430	1	2.5278	0.140094	ecEp_battery_cell1(mp),ecEp_battery_cell2(mp),i_female_germline2_nurse	ectoderm,germ line	ecEp_battery_cell,i_female_germline	head,body
t14571aep	t14571aep|EIF3A_NEMVE	PF01399.27	PCI	A7SK48|EIF3A_NEMVE Eukaryotic translation initiation factor 3 subunit A {ECO:0000255|HAMAP-Rule:MF_03000} OS=Nematostella vectensis (Starlet sea anemone)	0	PREDICTED: eukaryotic translation initiation factor 3 subunit A-like [Hydra vulgaris]	0	EIF3A_NEMVE	FALSE	1.31889	432	1	2.50306	0.13473	i_female_germline1,i_nb1,i_nb2,i_neuron/gland_cell_progenitor,i_neuron_progenitor,i_stem_cell/progenitor	germ line,interstitial	i_female_germline,i_nb,i_neuron_progenitor,i_stem_cell_progenitor	body
t15258aep	t15258aep					PREDICTED: uncharacterized protein LOC100210078 [Hydra vulgaris]	2.03e-78		FALSE	1.31789	433	2	1.11972	1.51606	i_nematocyte,i_neuron_ec1,i_neuron_ec2,i_neuron_ec3,i_neuron_ec4,i_neuron_ec5,i_neuron_en1,i_neuron_en2,i_neuron_en3	interstitial,ectoderm,endoderm	i_nematocyte,i_neuron_ec,i_neuron_en	head,nerve net
t13256aep	t13256aep|CSL3_ONCKE	PF02140.18	Gal_Lectin	P86179|CSL3_ONCKE L-rhamnose-binding lectin CSL3 {ECO:0000303|Ref.1} OS=Oncorhynchus keta (Chum salmon) (Salmo keta)	9.67e-20	PREDICTED: rhamnose-binding lectin-like [Hydra vulgaris]	5.99e-81	CSL3_ONCKE	FALSE	1.31225	434	2	2.31082	0.313689	ecEp_basal_disk	ectoderm	ecEp_basal_disk	foot
t22994aep	t22994aep|CORO6_HUMAN	PF08953.11;PF16300.5;PF00400.32	DUF1899;WD40_4;WD40	Q6QEF8|CORO6_HUMAN Coronin-6 OS=Homo sapiens (Human)	1.96e-123	PREDICTED: coronin-6-like isoform X1 [Hydra vulgaris]	0	CORO6_HUMAN	FALSE	1.3019	435	2	2.18999	0.413812	enEp-nb(pd),enEp-nem(pd),enEp_foot,enEp_head,enEp_SC1,enEp_stem_cell,enEp_tentacle,i_nematocyte	endoderm,interstitial	enEp-nb,enEp-nem,enEp_foot,enEp_head,enEp_SC1,enEp_stem_cell,enEp_tentacle,i_nematocyte	body,head,foot
t7219aep	t7219aep|MYLIP_RAT	PF09379.10;PF13920.6;PF00373.18;PF09380.10	FERM_N;zf-C3HC4_3;FERM_M;FERM_C	D3ZDI6|MYLIP_RAT E3 ubiquitin-protein ligase MYLIP OS=Rattus norvegicus (Rat)	8.02e-54	PREDICTED: E3 ubiquitin-protein ligase MYLIP-like [Hydra vulgaris]	0	MYLIP_RAT	FALSE	1.29295	437	2	2.07317	0.512731	ecEp_battery_cell2(mp),i_nematocyte,i_neuron_progenitor	ectoderm,interstitial	ecEp_battery_cell,i_nematocyte,i_neuron_progenitor	head,body
t7296aep	t7296aep|CO1A2_LITCT	PF01391.18;PF01410.18	Collagen;COLFI	O42350|CO1A2_LITCT Collagen alpha-2(I) chain OS=Lithobates catesbeiana (American bullfrog) (Rana catesbeiana)	1.08e-70	PREDICTED: collagen alpha-1(III) chain-like [Hydra vulgaris]	0	CO1A2_LITCT	FALSE	1.28802	439	1	2.53236	0.0436742	enEp-nb(pd),enEp-nem(pd),enEp_foot,enEp_head,enEp_SC1,enEp_stem_cell,enEp_tent-nem(pd),enEp_tentacle	endoderm	enEp-nb,enEp-nem,enEp_foot,enEp_head,enEp_SC1,enEp_stem_cell,enEp_tent-nem,enEp_tentacle	body,head,foot
t29264aep	t29264aep|LAMP1_HUMAN			P11279|LAMP1_HUMAN Lysosome-associated membrane glycoprotein 1 OS=Homo sapiens (Human)	2.52e-10	PREDICTED: lysosome-associated membrane glycoprotein 1-like [Hydra vulgaris]	1.66e-168	LAMP1_HUMAN	FALSE	1.28776	441	2	2.17589	0.39963	ecEp_battery_cell1(mp),ecEp_battery_cell2(mp),ecEp_head,ecEp_stem_cell	ectoderm	ecEp_battery_cell,ecEp_head,ecEp_stem_cell	head,body
t23853aep	t23853aep|FAT4_HUMAN	PF00028.17;PF08266.12;PF08758.11;PF16184.5	Cadherin;Cadherin_2;Cadherin_pro;Cadherin_3	Q6V0I7|FAT4_HUMAN Protocadherin Fat 4 OS=Homo sapiens (Human)	1.66e-176	PREDICTED: protocadherin Fat 1, partial [Hydra vulgaris]	0	FAT4_HUMAN	FALSE	1.28571	442	1	2.51919	0.052235	ecEp_battery_cell1(mp),ecEp_battery_cell2(mp),ecEp_head,ecEp_stem_cell	ectoderm	ecEp_battery_cell,ecEp_head,ecEp_stem_cell	head,body
t10983aep	t10983aep|SAP_HUMAN	PF03489.17;PF05184.15	SapB_2;SapB_1	P07602|SAP_HUMAN Prosaposin OS=Homo sapiens (Human)	2.88e-27	PREDICTED: prosaposin-like isoform X1 [Hydra vulgaris]	6.71e-131	SAP_HUMAN	FALSE	1.27633	446	1	2.4051	0.147565	ecEp_battery_cell1(mp),ecEp_battery_cell2(mp),enEp-nb(pd),enEp-nem(pd),enEp_foot,enEp_head,enEp_SC1,enEp_stem_cell,enEp_tent-nem(pd),enEp_tentacle	ectoderm,endoderm	ecEp_battery_cell,enEp-nb,enEp-nem,enEp_foot,enEp_head,enEp_SC1,enEp_stem_cell,enEp_tent-nem,enEp_tentacle	head,body,foot
t23542aep	t23542aep					PREDICTED: uncharacterized protein LOC101236174 [Hydra vulgaris]	2.28e-94		FALSE	1.27402	447	2	1.83845	0.709591	ecEp_basal_disk,ecEp_stem_cell,i_female_germline2_nurse	ectoderm,germ line	ecEp_basal_disk,ecEp_stem_cell,i_female_germline	foot,body
t35636aep	t35636aep|GLRX_RICCO	PF00462.24	Glutaredoxin	P55143|GLRX_RICCO Glutaredoxin OS=Ricinus communis (Castor bean)	2.53e-23	PREDICTED: glutaredoxin-2, mitochondrial-like [Hydra vulgaris]	5.64e-62	GLRX_RICCO	FALSE	1.26283	448	1	2.52567	0	enEp-nb(pd),enEp_SC1,enEp_stem_cell,i_female_germline1,i_SC,i_stem_cell/progenitor	endoderm,germ line,interstitial	enEp-nb,enEp_SC1,enEp_stem_cell,i_female_germline,i_SC,i_stem_cell_progenitor	body
t6227aep	t6227aep|ZFAN5_HUMAN	PF01754.16;PF01428.16	zf-A20;zf-AN1	O76080|ZFAN5_HUMAN AN1-type zinc finger protein 5 OS=Homo sapiens (Human)	6.17e-44	PREDICTED: AN1-type zinc finger protein 5-like [Hydra vulgaris]	2.06e-129	ZFAN5_HUMAN	FALSE	1.26256	449	2	2.02823	0.496899	ecEp_battery_cell1(mp),ecEp_battery_cell2(mp),enEp_tent-nem(pd),enEp_tentacle,i_nematocyte,i_neuron_ec1,i_neuron_ec2,i_neuron_ec3	ectoderm,endoderm,interstitial	ecEp_battery_cell,enEp_tent-nem,enEp_tentacle,i_nematocyte,i_neuron_ec	head,nerve net
t26210aep	t26210aep|RAN_BRUMA	PF00071.22;PF08477.13;PF00025.21	Ras;Roc;Arf	P38542|RAN_BRUMA GTP-binding nuclear protein Ran OS=Brugia malayi (Filarial nematode worm)	6.68e-132	PREDICTED: GTP-binding nuclear protein Ran-like [Hydra vulgaris]	1.47e-159	RAN_BRUMA	FALSE	1.26226	450	2	1.95877	0.56575	i_female_germline1,i_female_germline2_nurse,i_male_germline,i_nb1,i_neuron/gland_cell_progenitor,i_stem_cell/progenitor	germ line,interstitial	i_female_germline,i_male_germline,i_nb,i_neuron_progenitor,i_stem_cell_progenitor	body
t30827aep	t30827aep								FALSE	1.25507	451	2	2.04909	0.461059	ecEp_battery_cell1(mp),ecEp_battery_cell2(mp),ecEp_head,ecEp_stem_cell	ectoderm	ecEp_battery_cell,ecEp_head,ecEp_stem_cell	head,body
t23176aep	t23176aep|LAMC_DROME	PF00038.21	Filament	Q03427|LAMC_DROME Lamin-C OS=Drosophila melanogaster (Fruit fly)	4.97e-13	PREDICTED: lamin-C [Hydra vulgaris] >gi|190014568|dbj|BAG48262.1| nematocilin B [Hydra vulgaris]	0	LAMC_DROME	FALSE	1.25426	452	1	2.35857	0.149946	ecEp_battery_cell2(mp),enEp-nem(pd),enEp_tent-nem(pd),i_nematocyte	ectoderm,endoderm,interstitial	ecEp_battery_cell,enEp-nem,enEp_tent-nem,i_nematocyte	head
t12041aep	t12041aep|MDHC_HUMAN	PF02866.18;PF00056.23	Ldh_1_C;Ldh_1_N	P40925|MDHC_HUMAN Malate dehydrogenase, cytoplasmic OS=Homo sapiens (Human)	2.34e-166	PREDICTED: malate dehydrogenase, cytoplasmic-like [Hydra vulgaris]	0	MDHC_HUMAN	FALSE	1.25189	455	2	2.0897	0.414082	enEp-nem(pd),enEp_foot,enEp_head,enEp_SC1,enEp_stem_cell,i_female_germline1,i_female_germline2_nurse,i_neuron_progenitor	endoderm,germ line,interstitial	enEp-nem,enEp_foot,enEp_head,enEp_SC1,enEp_stem_cell,i_female_germline,i_neuron_progenitor	head,foot,body
t13969aep	t13969aep|SORCN_PONAB	PF00036.32;PF13833.6;PF13405.6;PF13499.6	EF-hand_1;EF-hand_8;EF-hand_6;EF-hand_7	Q5R4U9|SORCN_PONAB Sorcin OS=Pongo abelii (Sumatran orangutan) (Pongo pygmaeus abelii)	4.77e-69	PREDICTED: sorcin-like [Hydra vulgaris]	1.51e-115	SORCN_PONAB	FALSE	1.24852	456	1	2.33169	0.165359	ecEp_battery_cell1(mp),ecEp_battery_cell2(mp),ecEp_head,ecEp_stem_cell,enEp_foot,enEp_head,enEp_tentacle	ectoderm,endoderm	ecEp_battery_cell,ecEp_head,ecEp_stem_cell,enEp_foot,enEp_head,enEp_tentacle	head,body,foot
t9576aep	t9576aep								FALSE	1.24316	458	2	2.12504	0.36127	ecEp_basal_disk,ecEp_battery_cell1(mp),ecEp_battery_cell2(mp),ecEp_head,ecEp_stem_cell	ectoderm	ecEp_basal_disk,ecEp_battery_cell,ecEp_head,ecEp_stem_cell	foot,head,body
t25590aep	t25590aep|RAB7A_CANLF	PF00071.22;PF08477.13;PF00025.21;PF12631.7;PF01926.23	Ras;Roc;Arf;MnmE_helical;MMR_HSR1	P18067|RAB7A_CANLF Ras-related protein Rab-7a OS=Canis lupus familiaris (Dog) (Canis familiaris)	8.58e-127	PREDICTED: ras-related protein Rab-7a-like [Hydra vulgaris]	1.34e-147	RAB7A_CANLF	FALSE	1.23481	459	2	1.81205	0.657563	ecEp_battery_cell1(mp),ecEp_battery_cell2(mp),enEp-nb(pd),enEp-nem(pd),enEp_foot,enEp_head,enEp_SC1,enEp_stem_cell,enEp_tentacle	ectoderm,endoderm	ecEp_battery_cell,enEp-nb,enEp-nem,enEp_foot,enEp_head,enEp_SC1,enEp_stem_cell,enEp_tentacle	head,body,foot
t11822aep	t11822aep|CATB_BOVIN	PF00112.23;PF08127.13	Peptidase_C1;Propeptide_C1	P07688|CATB_BOVIN Cathepsin B OS=Bos taurus (Bovine)	1.62e-119	PREDICTED: cathepsin B-like [Hydra vulgaris]	0	CATB_BOVIN	FALSE	1.21322	465	2	2.04604	0.380394	enEp-nb(pd),enEp-nem(pd),enEp_foot,enEp_head,enEp_SC1,enEp_stem_cell,enEp_tent-nem(pd),enEp_tentacle	endoderm	enEp-nb,enEp-nem,enEp_foot,enEp_head,enEp_SC1,enEp_stem_cell,enEp_tent-nem,enEp_tentacle	body,head,foot
t37327aep	t37327aep|TCB2_CAEBR	PF01498.18;PF13358.6	HTH_Tnp_Tc3_2;DDE_3	Q04202|TCB2_CAEBR Transposable element Tcb2 transposase OS=Caenorhabditis briggsae	7e-90	Transposase domain containing protein [Haemonchus contortus]	1.91e-95	TCB2_CAEBR	FALSE	1.20943	467	1	2.38116	0.0377073	enEp-nem(pd),enEp_stem_cell	endoderm	enEp-nem,enEp_stem_cell	head,body
t12613aep	t12613aep					PREDICTED: uncharacterized protein LOC100203182 [Hydra vulgaris]	1.41e-60		FALSE	1.18669	475	2	1.90473	0.468657	i_granular_mucous_gland_cell,i_zymogen_gland_cell	interstitial	i_granular_mucous_gland_cell,i_gland_cell	head,body
t19278aep	t19278aep|CANB_DROME	PF00648.21;PF01067.22;PF00036.32;PF13405.6;PF13833.6;PF13499.6	Peptidase_C2;Calpain_III;EF-hand_1;EF-hand_6;EF-hand_8;EF-hand_7	Q9VT65|CANB_DROME Calpain-B OS=Drosophila melanogaster (Fruit fly)	0	PREDICTED: calpain-9-like [Hydra vulgaris]	0	CANB_DROME	FALSE	1.18456	476	2	2.0533	0.315826	ecEp_basal_disk,ecEp_battery_cell1(mp),ecEp_battery_cell2(mp),ecEp_head,ecEp_stem_cell	ectoderm	ecEp_basal_disk,ecEp_battery_cell,ecEp_head,ecEp_stem_cell	foot,head,body
t38371aep	t38371aep|GLRX_RICCO	PF00462.24	Glutaredoxin	P55143|GLRX_RICCO Glutaredoxin OS=Ricinus communis (Castor bean)	1.74e-21	PREDICTED: glutaredoxin-like [Hydra vulgaris]	3.27e-63	GLRX_RICCO	FALSE	1.18408	477	2	2.02428	0.343883	i_nb1,i_neuron/gland_cell_progenitor,i_neuron_progenitor,i_SC,i_stem_cell/progenitor	interstitial	i_nb,i_neuron_progenitor,i_SC,i_stem_cell_progenitor	body
t22028aep	t22028aep|ROAA_MOUSE	PF00076.22;PF16367.5;PF14605.6	RRM_1;RRM_7;Nup35_RRM_2	Q99020|ROAA_MOUSE Heterogeneous nuclear ribonucleoprotein A/B OS=Mus musculus (Mouse)	9.72e-42	PREDICTED: heterogeneous nuclear ribonucleoprotein A/B-like [Hydra vulgaris]	0	ROAA_MOUSE	FALSE	1.18319	478	2	2.12137	0.245001	i_female_germline1,i_female_germline2_nurse,i_male_germline,i_nb1,i_neuron/gland_cell_progenitor,i_neuron_progenitor,i_stem_cell/progenitor	germ line,interstitial	i_female_germline,i_male_germline,i_nb,i_neuron_progenitor,i_stem_cell_progenitor	body
t30000aep	t30000aep|CSL3_ONCKE	PF02140.18	Gal_Lectin	P86179|CSL3_ONCKE L-rhamnose-binding lectin CSL3 {ECO:0000303|Ref.1} OS=Oncorhynchus keta (Chum salmon) (Salmo keta)	8.04e-41	PREDICTED: rhamnose-binding lectin-like [Hydra vulgaris]	0	CSL3_ONCKE	FALSE	1.183	479	2	2.0504	0.315598	ecEp_basal_disk	ectoderm	ecEp_basal_disk	foot
t13518aep	t13518aep					PREDICTED: putative uncharacterized protein DDB_G0281733 [Hydra vulgaris]	1.8e-149		FALSE	1.18125	480	2	0.907597	1.45491	i_nb2,i_nb3,i_nb4,i_nb5	interstitial	i_nb	body
t34859aep	t34859aep|SET_MOUSE	PF00956.18	NAP	Q9EQU5|SET_MOUSE Protein SET OS=Mus musculus (Mouse)	2.59e-80	PREDICTED: protein SET [Hydra vulgaris]	6.13e-144	SET_MOUSE	FALSE	1.17524	483	2	2.01164	0.33884	i_female_germline1,i_male_germline,i_nb1,i_nb2,i_neuron/gland_cell_progenitor,i_stem_cell/progenitor	germ line,interstitial	i_female_germline,i_male_germline,i_nb,i_neuron_progenitor,i_stem_cell_progenitor	body
t2745aep	t2745aep								FALSE	1.17014	484	1	0	2.34028	i_female_germline1,i_female_germline2_nurse,i_nb1,i_neuron/gland_cell_progenitor,i_stem_cell/progenitor	germ line,interstitial	i_female_germline,i_nb,i_neuron_progenitor,i_stem_cell_progenitor	body
t21766aep	t21766aep					PREDICTED: mucin-2-like, partial [Hydra vulgaris]	1.42e-57		FALSE	1.15759	486	1	2.2187	0.0964742	ecEp_battery_cell1(mp),ecEp_battery_cell2(mp),ecEp_head	ectoderm	ecEp_battery_cell,ecEp_head	head
t12622aep	t12622aep|S61A2_MOUSE	PF00344.20;PF10559.9	SecY;Plug_translocon	Q9JLR1|S61A2_MOUSE Protein transport protein Sec61 subunit alpha isoform 2 OS=Mus musculus (Mouse)	0	PREDICTED: protein transport protein Sec61 subunit alpha isoform 2 [Hydra vulgaris]	0	S61A2_MOUSE	FALSE	1.14969	488	1	2.24241	0.0569701	ecEp_basal_disk,i_female_germline2_nurse,i_nb2,i_nb3,i_nb5	ectoderm,germ line,interstitial	ecEp_basal_disk,i_female_germline,i_nb	foot,body
t28525aep	t28525aep|PCCB_PIG	PF01039.22	Carboxyl_trans	P79384|PCCB_PIG Propionyl-CoA carboxylase beta chain, mitochondrial OS=Sus scrofa (Pig)	0	PREDICTED: propionyl-CoA carboxylase beta chain, mitochondrial [Hydra vulgaris]	0	PCCB_PIG	FALSE	1.14711	489	1	2.12272	0.171496	ecEp_stem_cell,i_neuron_progenitor	ectoderm,interstitial	ecEp_stem_cell,i_neuron_progenitor	body
t17344aep	t17344aep|RPB1_MOUSE	PF04998.17;PF04997.12;PF00623.20;PF04992.14;PF04990.12;PF04983.18;PF05000.17;PF05001.13	RNA_pol_Rpb1_5;RNA_pol_Rpb1_1;RNA_pol_Rpb1_2;RNA_pol_Rpb1_6;RNA_pol_Rpb1_7;RNA_pol_Rpb1_3;RNA_pol_Rpb1_4;RNA_pol_Rpb1_R	P08775|RPB1_MOUSE DNA-directed RNA polymerase II subunit RPB1 OS=Mus musculus (Mouse)	0	PREDICTED: DNA-directed RNA polymerase II subunit RPB1-like [Hydra vulgaris]	0	RPB1_MOUSE	FALSE	1.14404	490	1	2.28808	0	i_female_germline1,i_female_germline2_nurse,i_male_germline,i_nb1,i_neuron/gland_cell_progenitor,i_SC,i_stem_cell/progenitor	germ line,interstitial	i_female_germline,i_male_germline,i_nb,i_neuron_progenitor,i_SC,i_stem_cell_progenitor	body
t1689aep	t1689aep|ALRF2_MOUSE	PF00076.22;PF13865.6	RRM_1;FoP_duplication	Q9JJW6|ALRF2_MOUSE Aly/REF export factor 2 OS=Mus musculus (Mouse)	6.11e-41	PREDICTED: THO complex subunit 4-like [Hydra vulgaris] >gi|828218945|ref|XP_012561122.1| PREDICTED: THO complex subunit 4-like [Hydra vulgaris] >gi|828218947|ref|XP_012561124.1| PREDICTED: THO complex subunit 4-like [Hydra vulgaris]	1.09e-100	ALRF2_MOUSE	FALSE	1.13704	492	2	1.8093	0.464789	i_female_germline1,i_male_germline,i_nb1,i_neuron/gland_cell_progenitor,i_neuron_progenitor,i_stem_cell/progenitor	germ line,interstitial	i_female_germline,i_male_germline,i_nb,i_neuron_progenitor,i_stem_cell_progenitor	body
t22734aep	t22734aep|TCPH_BOVIN	PF00118.24	Cpn60_TCP1	Q2NKZ1|TCPH_BOVIN T-complex protein 1 subunit eta OS=Bos taurus (Bovine)	0	PREDICTED: T-complex protein 1 subunit eta-like [Hydra vulgaris]	0	TCPH_BOVIN	FALSE	1.13403	494	1	2.07228	0.195771	i_female_germline1,i_female_germline2_nurse,i_nb1,i_nb2,i_neuron/gland_cell_progenitor,i_stem_cell/progenitor	germ line,interstitial	i_female_germline,i_nb,i_neuron_progenitor,i_stem_cell_progenitor	body
t22765aep	t22765aep|ADA10_BOVIN	PF13688.6;PF13574.6;PF13582.6;PF01562.19	Reprolysin_5;Reprolysin_2;Reprolysin_3;Pep_M12B_propep	Q10741|ADA10_BOVIN Disintegrin and metalloproteinase domain-containing protein 10 OS=Bos taurus (Bovine)	2.44e-129	PREDICTED: disintegrin and metalloproteinase domain-containing protein 10-like [Hydra vulgaris]	0	ADA10_BOVIN	FALSE	1.13382	495	2	2.03608	0.231569	ecEp_basal_disk,ecEp_battery_cell1(mp),ecEp_battery_cell2(mp),ecEp_head,ecEp_stem_cell,enEp_head,i_nematocyte	ectoderm,endoderm,interstitial	ecEp_basal_disk,ecEp_battery_cell,ecEp_head,ecEp_stem_cell,enEp_head,i_nematocyte	foot,head,body
t8936aep	t8936aep|TCPE_MACFA	PF00118.24	Cpn60_TCP1	Q4R6V2|TCPE_MACFA T-complex protein 1 subunit epsilon OS=Macaca fascicularis (Crab-eating macaque) (Cynomolgus monkey)	0	PREDICTED: T-complex protein 1 subunit epsilon [Hydra vulgaris]	0	TCPE_MACFA	FALSE	1.13071	496	2	1.99308	0.268346	i_female_germline1,i_nb1,i_nb2,i_neuron/gland_cell_progenitor,i_neuron_progenitor,i_stem_cell/progenitor	germ line,interstitial	i_female_germline,i_nb,i_neuron_progenitor,i_stem_cell_progenitor	body
t7378aep	t7378aep|RBMX_DANRE	PF00076.22	RRM_1	Q7ZWA3|RBMX_DANRE RNA-binding motif protein, X chromosome OS=Danio rerio (Zebrafish) (Brachydanio rerio)	1.24e-11	PREDICTED: RNA-binding motif protein, X chromosome-like [Hydra vulgaris]	3.38e-153	RBMX_DANRE	FALSE	1.12231	499	2	1.89087	0.353752	i_female_germline1,i_nb1,i_nb2,i_neuron/gland_cell_progenitor,i_stem_cell/progenitor	germ line,interstitial	i_female_germline,i_nb,i_neuron_progenitor,i_stem_cell_progenitor	body
t24481aep	t24481aep					PREDICTED: uncharacterized protein LOC100208201 [Hydra vulgaris]	1.36e-124		FALSE	1.11622	502	1	2.06815	0.164287	ecEp_head,ecEp_stem_cell	ectoderm	ecEp_head,ecEp_stem_cell	head,body
t16657aep	t16657aep					PREDICTED: pol-RFamide neuropeptides-like [Hydra vulgaris]	7.1e-62		FALSE	1.1141	504	2	1.78838	0.43981	i_neuron_ec4	ectoderm	i_neuron_ec	nerve net
t26044aep	t26044aep|PSPB_RAT	PF02199.15;PF05184.15	SapA;SapB_1	P22355|PSPB_RAT Pulmonary surfactant-associated protein B OS=Rattus norvegicus (Rat)	8.03e-14	PREDICTED: prosaposin-like, partial [Hydra vulgaris]	2.51e-135	PSPB_RAT	FALSE	1.11061	505	1	2.11557	0.105644	ecEp_battery_cell1(mp),ecEp_battery_cell2(mp),enEp-nb(pd),enEp-nem(pd),enEp_foot,enEp_head,enEp_SC1,enEp_stem_cell,enEp_tent-nem(pd),enEp_tentacle	ectoderm,endoderm	ecEp_battery_cell,enEp-nb,enEp-nem,enEp_foot,enEp_head,enEp_SC1,enEp_stem_cell,enEp_tent-nem,enEp_tentacle	head,body,foot
t32785aep	t32785aep|HEBP1_MOUSE	PF04832.12	SOUL	Q9R257|HEBP1_MOUSE Heme-binding protein 1 OS=Mus musculus (Mouse)	1.39e-14	PREDICTED: heme-binding protein 1-like [Hydra vulgaris]	0	HEBP1_MOUSE	FALSE	1.11049	506	2	1.8472	0.373774	enEp-nb(pd),enEp-nem(pd),enEp_foot,enEp_head,enEp_SC1,enEp_stem_cell,enEp_tent-nem(pd),enEp_tentacle	endoderm	enEp-nb,enEp-nem,enEp_foot,enEp_head,enEp_SC1,enEp_stem_cell,enEp_tent-nem,enEp_tentacle	body,head,foot
t17073aep	t17073aep								FALSE	1.10266	509	1	2.20532	0	i_nematocyte,i_neuron/gland_cell_progenitor,i_neuron_ec1,i_neuron_ec4,i_neuron_en1,i_neuron_progenitor	interstitial,ectoderm,endoderm	i_nematocyte,i_neuron_progenitor,i_neuron_ec,i_neuron_en	head,body,nerve net
t36612aep	t36612aep|ERIC3_HUMAN	PF15257.6	DUF4590	Q5RHP9|ERIC3_HUMAN Glutamate-rich protein 3 OS=Homo sapiens (Human)	1.02e-29	PREDICTED: glutamate-rich protein 3-like, partial [Hydra vulgaris]	0	ERIC3_HUMAN	FALSE	1.09414	510	2	1.14057	1.04772	i_granular_mucous_gland_cell,i_male_germline,i_neuron_ec3,i_neuron_ec5	interstitial,germ line,ectoderm	i_granular_mucous_gland_cell,i_male_germline,i_neuron_ec	head,body,nerve net
t3835aep	t3835aep|TCPG_BOVIN	PF00118.24	Cpn60_TCP1	Q3T0K2|TCPG_BOVIN T-complex protein 1 subunit gamma OS=Bos taurus (Bovine)	0	PREDICTED: T-complex protein 1 subunit gamma-like [Hydra vulgaris]	0	TCPG_BOVIN	FALSE	1.09207	512	2	1.95958	0.224556	i_female_germline1,i_female_germline2_nurse,i_nb1,i_neuron/gland_cell_progenitor,i_SC,i_stem_cell/progenitor	germ line,interstitial	i_female_germline,i_nb,i_neuron_progenitor,i_SC,i_stem_cell_progenitor	body
t3459aep	t3459aep|SODC4_MAIZE	PF00080.20	Sod_Cu	P23345|SODC4_MAIZE Superoxide dismutase [Cu-Zn] 4A OS=Zea mays (Maize)	2.62e-58	uncharacterized protein LOC100200684 [Hydra vulgaris] >gi|828212268|ref|XP_012558939.1| PREDICTED: uncharacterized protein LOC100200684 [Hydra vulgaris] >gi|388594894|gb|AFK74882.1| superoxide dismutase [Hydra vulgaris]	9.46e-103	SODC4_MAIZE	FALSE	1.09098	513	2	1.84902	0.332949	ecEp_head,ecEp_stem_cell,enEp_stem_cell,i_female_germline2_nurse,i_male_germline	ectoderm,endoderm,germ line	ecEp_head,ecEp_stem_cell,enEp_stem_cell,i_female_germline,i_male_germline	head,body
t20507aep	t20507aep|CYTA_HUMAN	PF00031.21	Cystatin	P01040|CYTA_HUMAN Cystatin-A OS=Homo sapiens (Human)	4.07e-26	PREDICTED: cystatin-A-like [Hydra vulgaris]	6.05e-64	CYTA_HUMAN	FALSE	1.08039	516	2	1.48925	0.671525	ecEp_battery_cell1(mp),ecEp_battery_cell2(mp),ecEp_head,enEp_foot,enEp_tent-nem(pd),enEp_tentacle	ectoderm,endoderm	ecEp_battery_cell,ecEp_head,enEp_foot,enEp_tent-nem,enEp_tentacle	head,foot
t33641aep	t33641aep|AT5F1_BOVIN	PF05405.14	Mt_ATP-synt_B	P13619|AT5F1_BOVIN ATP synthase F(0) complex subunit B1, mitochondrial OS=Bos taurus (Bovine)	3.66e-22	PREDICTED: ATP synthase F(0) complex subunit B1, mitochondrial-like [Hydra vulgaris]	8.59e-158	AT5F1_BOVIN	FALSE	1.0799	517	1	2.00913	0.150677	ecEp_head	ectoderm	ecEp_head	head
t20203aep	t20203aep|ELL_HUMAN	PF10390.9;PF07303.13	ELL;Occludin_ELL	P55199|ELL_HUMAN RNA polymerase II elongation factor ELL OS=Homo sapiens (Human)	3.22e-27	PREDICTED: RNA polymerase II elongation factor ELL-like [Hydra vulgaris]	0	ELL_HUMAN	FALSE	1.07667	518	1	1.96749	0.185859	i_granular_mucous_gland_cell,i_nb1,i_nb2,i_neuron/gland_cell_progenitor,i_SC,i_stem_cell/progenitor,i_zymogen_gland_cell	interstitial	i_granular_mucous_gland_cell,i_nb,i_neuron_progenitor,i_SC,i_stem_cell_progenitor,i_gland_cell	head,body
t19385aep	t19385aep|IF4A3_HUMAN	PF00270.29;PF00271.31	DEAD;Helicase_C	P38919|IF4A3_HUMAN Eukaryotic initiation factor 4A-III OS=Homo sapiens (Human)	0	PREDICTED: eukaryotic initiation factor 4A-III [Hydra vulgaris]	0	IF4A3_HUMAN	FALSE	1.07655	519	1	2.02891	0.124196	i_female_germline1,i_nb1,i_neuron/gland_cell_progenitor,i_stem_cell/progenitor	germ line,interstitial	i_female_germline,i_nb,i_neuron_progenitor,i_stem_cell_progenitor	body
t28736aep	t28736aep					PREDICTED: uncharacterized protein LOC100203042, partial [Hydra vulgaris]	0		FALSE	1.07571	520	1	2.15143	0	ecEp_battery_cell1(mp),ecEp_battery_cell2(mp),ecEp_head,ecEp_stem_cell	ectoderm	ecEp_battery_cell,ecEp_head,ecEp_stem_cell	head,body
t13338aep	t13338aep|TRA2B_RAT	PF00076.22	RRM_1	P62997|TRA2B_RAT Transformer-2 protein homolog beta OS=Rattus norvegicus (Rat)	2.02e-44	PREDICTED: transformer-2 protein homolog alpha-like isoform X1 [Hydra vulgaris]	1.53e-75	TRA2B_RAT	FALSE	1.06961	522	2	1.78319	0.356025	i_female_germline1,i_male_germline,i_nb1,i_nb2,i_neuron/gland_cell_progenitor,i_neuron_progenitor,i_stem_cell/progenitor	germ line,interstitial	i_female_germline,i_male_germline,i_nb,i_neuron_progenitor,i_stem_cell_progenitor	body
t19432aep	t19432aep|GBB_PINFU	PF00400.32;PF12894.7	WD40;ANAPC4_WD40	Q5GIS3|GBB_PINFU Guanine nucleotide-binding protein subunit beta {ECO:0000250|UniProtKB:P23232} OS=Pinctada fucata (Akoya pearl oyster) (Pinctada imbricata fucata)	0	PREDICTED: guanine nucleotide-binding protein G(I)/G(S)/G(T) subunit beta-1 [Hydra vulgaris]	0	GBB_PINFU	FALSE	1.06848	523	1	2.01629	0.120675	ecEp_battery_cell1(mp),ecEp_battery_cell2(mp),i_neuron_progenitor	ectoderm,interstitial	ecEp_battery_cell,i_neuron_progenitor	head,body
t32545aep	t32545aep|AT1A_HYDVU	PF00122.20;PF00689.21;PF13246.6;PF00702.26;PF00690.26	E1-E2_ATPase;Cation_ATPase_C;Cation_ATPase;Hydrolase;Cation_ATPase_N	P35317|AT1A_HYDVU Sodium/potassium-transporting ATPase subunit alpha OS=Hydra vulgaris (Hydra) (Hydra attenuata)	0	sodium/potassium-transporting ATPase subunit alpha [Hydra vulgaris] >gi|461547|sp|P35317.1|AT1A_HYDVU RecName: Full=Sodium/potassium-transporting ATPase subunit alpha; Short=Na(+)/K(+) ATPase alpha subunit; AltName: Full=Sodium pump subunit alpha >gi|159258|gb|AAA29207.1| Na,K-ATPase alpha subunit [Hydra vulgaris]	0	AT1A_HYDVU	FALSE	1.06173	524	2	1.9223	0.201165	ecEp_battery_cell1(mp),ecEp_battery_cell2(mp),enEp_foot,enEp_tent-nem(pd),enEp_tentacle,i_female_germline2_nurse,i_nb1	ectoderm,endoderm,germ line,interstitial	ecEp_battery_cell,enEp_foot,enEp_tent-nem,enEp_tentacle,i_female_germline,i_nb	head,foot,body
t19284aep	t19284aep|ATPG_BOVIN	PF00231.19	ATP-synt	P05631|ATPG_BOVIN ATP synthase subunit gamma, mitochondrial OS=Bos taurus (Bovine)	3.37e-114	PREDICTED: ATP synthase subunit gamma, mitochondrial-like [Hydra vulgaris]	0	ATPG_BOVIN	FALSE	1.05528	526	1	2.11056	0	ecEp_head	ectoderm	ecEp_head	head
t13979aep	t13979aep|ERG_HUMAN	PF00178.22;PF02198.16	Ets;SAM_PNT	P11308|ERG_HUMAN Transcriptional regulator ERG OS=Homo sapiens (Human)	3.45e-86	PREDICTED: transcriptional regulator Erg-like isoform X1 [Hydra vulgaris]	0	ERG_HUMAN	FALSE	1.0537	527	2	1.66029	0.447104	ecEp_basal_disk,ecEp_battery_cell1(mp),ecEp_battery_cell2(mp),ecEp_head,ecEp_stem_cell,enEp_foot,enEp_head,enEp_SC1,enEp_tent-nem(pd),enEp_tentacle	ectoderm,endoderm	ecEp_basal_disk,ecEp_battery_cell,ecEp_head,ecEp_stem_cell,enEp_foot,enEp_head,enEp_SC1,enEp_tent-nem,enEp_tentacle	foot,head,body
t14477aep	t14477aep|CO1A2_ONCMY	PF01391.18;PF01410.18	Collagen;COLFI	O93484|CO1A2_ONCMY Collagen alpha-2(I) chain OS=Oncorhynchus mykiss (Rainbow trout) (Salmo gairdneri)	1.71e-51	PREDICTED: collagen alpha-1(I) chain-like [Hydra vulgaris]	0	CO1A2_ONCMY	FALSE	1.05003	528	2	1.89683	0.203233	enEp-nb(pd),enEp-nem(pd),enEp_foot,enEp_head,enEp_SC1,enEp_stem_cell,enEp_tent-nem(pd),enEp_tentacle	endoderm	enEp-nb,enEp-nem,enEp_foot,enEp_head,enEp_SC1,enEp_stem_cell,enEp_tent-nem,enEp_tentacle	body,head,foot
t8458aep	t8458aep|DCAM_XENLA	PF01536.16	SAM_decarbox	P79888|DCAM_XENLA S-adenosylmethionine decarboxylase proenzyme OS=Xenopus laevis (African clawed frog)	8.27e-80	PREDICTED: S-adenosylmethionine decarboxylase proenzyme 2-like [Hydra vulgaris]	0	DCAM_XENLA	FALSE	1.04823	529	2	1.6515	0.444958	ecEp_battery_cell1(mp),ecEp_battery_cell2(mp),enEp_tent-nem(pd),i_nematocyte	ectoderm,endoderm,interstitial	ecEp_battery_cell,enEp_tent-nem,i_nematocyte	head
t31467aep	t31467aep|MCTP1_HUMAN	PF00168.30	C2	Q6DN14|MCTP1_HUMAN Multiple C2 and transmembrane domain-containing protein 1 OS=Homo sapiens (Human)	3.17e-11	PREDICTED: putative leucine-rich repeat-containing protein DDB_G0290503 [Hydra vulgaris]	1.29e-125	MCTP1_HUMAN	FALSE	1.04775	530	2	1.4741	0.621408	ecEp_basal_disk,ecEp_battery_cell1(mp),ecEp_battery_cell2(mp),ecEp_head,ecEp_stem_cell,enEp_foot,enEp_head,enEp_SC1,enEp_stem_cell,enEp_tent-nem(pd),enEp_tentacle,i_female_germline2_nurse	ectoderm,endoderm,germ line	ecEp_basal_disk,ecEp_battery_cell,ecEp_head,ecEp_stem_cell,enEp_foot,enEp_head,enEp_SC1,enEp_stem_cell,enEp_tent-nem,enEp_tentacle,i_female_germline	foot,head,body
t31421aep	t31421aep	PF01607.24	CBM_14			PREDICTED: uncharacterized protein LOC100197130 [Hydra vulgaris]	0		FALSE	1.04194	531	1	1.88809	0.195781	enEp-nb(pd),enEp-nem(pd),enEp_foot,enEp_head,enEp_SC1,enEp_stem_cell,enEp_tent-nem(pd),enEp_tentacle	endoderm	enEp-nb,enEp-nem,enEp_foot,enEp_head,enEp_SC1,enEp_stem_cell,enEp_tent-nem,enEp_tentacle	body,head,foot
t16956aep	t16956aep					PREDICTED: uncharacterized protein LOC100199632 [Hydra vulgaris]	6.66e-173		FALSE	1.04191	532	1	1.94563	0.138188	i_granular_mucous_gland_cell,i_spumous_mucous_gland_cell	interstitial	i_granular_mucous_gland_cell,i_gland_cell	head
t24522aep	t24522aep|VATL_RAT	PF00137.21	ATP-synt_C	P63081|VATL_RAT V-type proton ATPase 16 kDa proteolipid subunit OS=Rattus norvegicus (Rat)	2.43e-67	PREDICTED: V-type proton ATPase 16 kDa proteolipid subunit [Hydra vulgaris]	4.13e-85	VATL_RAT	FALSE	1.03948	533	2	1.72915	0.349811	ecEp_battery_cell1(mp),ecEp_battery_cell2(mp),ecEp_head,enEp-nb(pd),enEp-nem(pd),enEp_foot,enEp_head,enEp_SC1,enEp_stem_cell	ectoderm,endoderm	ecEp_battery_cell,ecEp_head,enEp-nb,enEp-nem,enEp_foot,enEp_head,enEp_SC1,enEp_stem_cell	head,body,foot
t3661aep	t3661aep					PREDICTED: uncharacterized protein LOC101239931 isoform X2 [Hydra vulgaris]	4.51e-81		FALSE	1.03278	534	2	1.79626	0.269308	enEp-nb(pd),enEp-nem(pd),enEp_foot,enEp_head,enEp_SC1,enEp_stem_cell,enEp_tent-nem(pd),enEp_tentacle	endoderm	enEp-nb,enEp-nem,enEp_foot,enEp_head,enEp_SC1,enEp_stem_cell,enEp_tent-nem,enEp_tentacle	body,head,foot
t11438aep	t11438aep|TCPD_TAKRU	PF00118.24	Cpn60_TCP1	P53451|TCPD_TAKRU T-complex protein 1 subunit delta OS=Takifugu rubripes (Japanese pufferfish) (Fugu rubripes)	0	PREDICTED: T-complex protein 1 subunit delta-like [Hydra vulgaris]	0	TCPD_TAKRU	FALSE	1.03016	535	1	1.96581	0.0945097	i_female_germline1,i_nb1,i_neuron/gland_cell_progenitor,i_stem_cell/progenitor	germ line,interstitial	i_female_germline,i_nb,i_neuron_progenitor,i_stem_cell_progenitor	body
t19283aep	t19283aep|IF2B_MOUSE	PF01873.17	eIF-5_eIF-2B	Q99L45|IF2B_MOUSE Eukaryotic translation initiation factor 2 subunit 2 OS=Mus musculus (Mouse)	2.75e-97	PREDICTED: eukaryotic translation initiation factor 2 subunit 2-like [Hydra vulgaris]	0	IF2B_MOUSE	FALSE	1.02728	536	2	1.83894	0.215614	i_female_germline1,i_nb1,i_nb2,i_neuron/gland_cell_progenitor,i_SC,i_stem_cell/progenitor	germ line,interstitial	i_female_germline,i_nb,i_neuron_progenitor,i_SC,i_stem_cell_progenitor	body
t12601aep	t12601aep					PREDICTED: uncharacterized protein LOC105850171, partial [Hydra vulgaris]	6.15e-135		FALSE	1.02516	537	2	1.75432	0.296004	i_spumous_mucous_gland_cell	interstitial	i_gland_cell	head
t29194aep	t29194aep|DYST_HUMAN	PF00435.21	Spectrin	Q03001|DYST_HUMAN Dystonin OS=Homo sapiens (Human)	2.7e-21	PREDICTED: dystonin-like, partial [Hydra vulgaris]	0	DYST_HUMAN	FALSE	1.02292	538	1	1.88974	0.156097	ecEp_basal_disk,ecEp_battery_cell1(mp),ecEp_battery_cell2(mp)	ectoderm	ecEp_basal_disk,ecEp_battery_cell	foot,head
t13977aep	t13977aep|LTBP2_HUMAN	PF07645.15;PF12947.7;PF12662.7;PF12946.7;PF00008.27;PF06247.11	EGF_CA;EGF_3;cEGF;EGF_MSP1_1;EGF;Plasmod_Pvs28	Q14767|LTBP2_HUMAN Latent-transforming growth factor beta-binding protein 2 OS=Homo sapiens (Human)	3.75e-24	PREDICTED: uncharacterized protein LOC100201180, partial [Hydra vulgaris]	0	LTBP2_HUMAN	FALSE	1.02145	539	1	1.98223	0.0606671	ecEp_battery_cell1(mp),ecEp_battery_cell2(mp),ecEp_head,ecEp_stem_cell	ectoderm	ecEp_battery_cell,ecEp_head,ecEp_stem_cell	head,body
t28741aep	t28741aep					hypothetical protein CGI_10013165 [Crassostrea gigas]	6.08e-21		FALSE	1.02042	540	2	1.63821	0.402635	ecEp_basal_disk	ectoderm	ecEp_basal_disk	foot
t15231aep	t15231aep|GSH0_RAT			P48508|GSH0_RAT Glutamate--cysteine ligase regulatory subunit OS=Rattus norvegicus (Rat)	1.49e-41	PREDICTED: glutamate--cysteine ligase regulatory subunit-like [Hydra vulgaris]	0	GSH0_RAT	FALSE	1.01982	541	1	1.94597	0.0936737	ecEp_basal_disk,ecEp_battery_cell2(mp),enEp-nem(pd),enEp_foot,enEp_SC1,i_nematocyte	ectoderm,endoderm,interstitial	ecEp_basal_disk,ecEp_battery_cell,enEp-nem,enEp_foot,enEp_SC1,i_nematocyte	foot,head,body
t28029aep	t28029aep|PDIA3_PONAB	PF00085.20;PF13848.6;PF13905.6;PF13098.6	Thioredoxin;Thioredoxin_6;Thioredoxin_8;Thioredoxin_2	Q5RDG4|PDIA3_PONAB Protein disulfide-isomerase A3 OS=Pongo abelii (Sumatran orangutan) (Pongo pygmaeus abelii)	3.24e-142	PREDICTED: protein disulfide-isomerase A3-like [Hydra vulgaris]	0	PDIA3_PONAB	FALSE	1.01968	542	1	1.9658	0.0735598	ecEp_head,ecEp_stem_cell,i_female_germline2_nurse,i_nb2,i_nb3	ectoderm,germ line,interstitial	ecEp_head,ecEp_stem_cell,i_female_germline,i_nb	head,body
t12608aep	t12608aep|FUMH_MOUSE	PF00206.20;PF10415.9	Lyase_1;FumaraseC_C	P97807|FUMH_MOUSE Fumarate hydratase, mitochondrial OS=Mus musculus (Mouse)	0	PREDICTED: fumarate hydratase, mitochondrial-like [Hydra vulgaris]	0	FUMH_MOUSE	FALSE	1.0141	545	1	1.82851	0.199682	i_female_germline2_nurse	germ line	i_female_germline	body
t3449aep	t3449aep|TSN11_MOUSE	PF00335.20	Tetraspanin	Q9D1D1|TSN11_MOUSE Tetraspanin-11 OS=Mus musculus (Mouse)	3.35e-39	PREDICTED: CD151 antigen-like [Hydra vulgaris] >gi|828223965|ref|XP_012562800.1| PREDICTED: CD151 antigen-like [Hydra vulgaris]	7.57e-163	TSN11_MOUSE	FALSE	1.00648	546	1	1.8362	0.176754	ecEp_basal_disk,ecEp_battery_cell1(mp),ecEp_battery_cell2(mp),ecEp_head,ecEp_stem_cell,i_female_germline2_nurse,i_granular_mucous_gland_cell,i_nematocyte,i_neuron_ec2,i_spumous_mucous_gland_cell	ectoderm,germ line,interstitial	ecEp_basal_disk,ecEp_battery_cell,ecEp_head,ecEp_stem_cell,i_female_germline,i_granular_mucous_gland_cell,i_nematocyte,i_neuron_ec,i_gland_cell	foot,head,body,nerve net
t22806aep	t22806aep|TEBP_PONAB			Q5NVM4|TEBP_PONAB Prostaglandin E synthase 3 OS=Pongo abelii (Sumatran orangutan) (Pongo pygmaeus abelii)	2.22e-18	PREDICTED: prostaglandin E synthase 3-like [Hydra vulgaris]	1.35e-107	TEBP_PONAB	FALSE	1.00003	549	1	1.88454	0.115526	i_neuron/gland_cell_progenitor,i_neuron_progenitor,i_stem_cell/progenitor	interstitial	i_neuron_progenitor,i_stem_cell_progenitor	body
t29595aep	t29595aep|ATF4_MOUSE	PF07716.15;PF00170.21	bZIP_2;bZIP_1	Q06507|ATF4_MOUSE Cyclic AMP-dependent transcription factor ATF-4 OS=Mus musculus (Mouse)	5.82e-07	PREDICTED: uncharacterized protein LOC100197237 [Hydra vulgaris]	0	ATF4_MOUSE	FALSE	0.996907	551	2	1.618	0.375813	ecEp_basal_disk,ecEp_battery_cell1(mp),ecEp_battery_cell2(mp),enEp_tent-nem(pd),i_male_germline,i_neuron_en3,i_spumous_mucous_gland_cell	ectoderm,endoderm,germ line,interstitial	ecEp_basal_disk,ecEp_battery_cell,enEp_tent-nem,i_male_germline,i_neuron_en,i_gland_cell	foot,head,body,nerve net
t22762aep	t22762aep|CATD_CLUHA	PF00026.23;PF14543.6	Asp;TAXi_N	Q9DEX3|CATD_CLUHA Cathepsin D OS=Clupea harengus (Atlantic herring)	6.31e-144	PREDICTED: lysosomal aspartic protease-like [Hydra vulgaris]	0	CATD_CLUHA	FALSE	0.996733	552	1	1.8471	0.146366	ecEp_battery_cell1(mp),ecEp_battery_cell2(mp),enEp-nb(pd),enEp-nem(pd),enEp_foot,enEp_head,enEp_SC1,enEp_stem_cell,enEp_tent-nem(pd),enEp_tentacle	ectoderm,endoderm	ecEp_battery_cell,enEp-nb,enEp-nem,enEp_foot,enEp_head,enEp_SC1,enEp_stem_cell,enEp_tent-nem,enEp_tentacle	head,body,foot
t11250aep	t11250aep					PREDICTED: YLP motif-containing protein 1-like isoform X2 [Hydra vulgaris]	9.33e-175		FALSE	0.994208	554	1	1.81382	0.174595	i_female_germline1,i_nb1,i_SC,i_stem_cell/progenitor	germ line,interstitial	i_female_germline,i_nb,i_SC,i_stem_cell_progenitor	body
t19731aep	t19731aep|IQGA1_HUMAN	PF00616.19;PF03836.15;PF00612.27;PF00307.31	RasGAP;RasGAP_C;IQ;CH	P46940|IQGA1_HUMAN Ras GTPase-activating-like protein IQGAP1 OS=Homo sapiens (Human)	0	PREDICTED: LOW QUALITY PROTEIN: ras GTPase-activating-like protein IQGAP1 [Hydra vulgaris]	0	IQGA1_HUMAN	FALSE	0.993708	555	1	1.85961	0.127806	ecEp_battery_cell1(mp),ecEp_battery_cell2(mp),enEp_foot,enEp_SC1,enEp_tent-nem(pd),enEp_tentacle,i_female_germline2_nurse	ectoderm,endoderm,germ line	ecEp_battery_cell,enEp_foot,enEp_SC1,enEp_tent-nem,enEp_tentacle,i_female_germline	head,foot,body
t15003aep	t15003aep|HEXA_HUMAN	PF00728.22;PF14845.6	Glyco_hydro_20;Glycohydro_20b2	P06865|HEXA_HUMAN Beta-hexosaminidase subunit alpha OS=Homo sapiens (Human)	9.54e-176	PREDICTED: beta-hexosaminidase subunit alpha-like isoform X1 [Hydra vulgaris] >gi|828196900|ref|XP_012553689.1| PREDICTED: beta-hexosaminidase subunit alpha-like isoform X2 [Hydra vulgaris]	0	HEXA_HUMAN	FALSE	0.990989	557	1	1.93001	0.0519683	ecEp_battery_cell1(mp),ecEp_battery_cell2(mp),ecEp_head,enEp-nb(pd),enEp-nem(pd),enEp_foot,enEp_head,enEp_SC1,enEp_stem_cell,enEp_tent-nem(pd),enEp_tentacle	ectoderm,endoderm	ecEp_battery_cell,ecEp_head,enEp-nb,enEp-nem,enEp_foot,enEp_head,enEp_SC1,enEp_stem_cell,enEp_tent-nem,enEp_tentacle	head,body,foot
t3957aep	t3957aep|IF2H_RAT	PF09173.11;PF00009.27;PF03144.25	eIF2_C;GTP_EFTU;GTP_EFTU_D2	C9WPN6|IF2H_RAT Eukaryotic translation initiation factor 2 subunit 3, Y-linked OS=Rattus norvegicus (Rat)	0	PREDICTED: eukaryotic translation initiation factor 2 subunit 3, Y-linked isoform X1 [Hydra vulgaris] >gi|828193875|ref|XP_012564503.1| PREDICTED: eukaryotic translation initiation factor 2 subunit 3, Y-linked isoform X2 [Hydra vulgaris]	0	IF2H_RAT	FALSE	0.990788	558	2	1.60991	0.371666	i_nb1,i_neuron/gland_cell_progenitor,i_SC,i_stem_cell/progenitor	interstitial	i_nb,i_neuron_progenitor,i_SC,i_stem_cell_progenitor	body
t30117aep	t30117aep					PREDICTED: golgin subfamily B member 1-like [Hydra vulgaris]	0		FALSE	0.990413	559	2	1.4967	0.484126	ecEp_battery_cell2(mp),enEp-nem(pd),enEp_tent-nem(pd),i_nematocyte	ectoderm,endoderm,interstitial	ecEp_battery_cell,enEp-nem,enEp_tent-nem,i_nematocyte	head
t15015aep	t15015aep					PREDICTED: uncharacterized protein LOC100209607 [Hydra vulgaris]	6.96e-153		FALSE	0.984673	561	1	1.84491	0.124436	enEp-nb(pd),enEp-nem(pd),enEp_foot,enEp_SC1,enEp_stem_cell,enEp_tent-nem(pd),enEp_tentacle	endoderm	enEp-nb,enEp-nem,enEp_foot,enEp_SC1,enEp_stem_cell,enEp_tent-nem,enEp_tentacle	body,head,foot
t6076aep	t6076aep					PREDICTED: zonadhesin-like [Hydra vulgaris]	2.67e-129		FALSE	0.983579	562	2	0.914297	1.05286	i_nb3	interstitial	i_nb	body
t19291aep	t19291aep|COPD_RAT	PF00928.21;PF01217.20	Adap_comp_sub;Clat_adaptor_s	Q66H80|COPD_RAT Coatomer subunit delta OS=Rattus norvegicus (Rat)	0	PREDICTED: coatomer subunit delta-like [Hydra vulgaris]	0	COPD_RAT	FALSE	0.983279	563	2	1.72905	0.237508	i_nb1,i_nb2	interstitial	i_nb	body
t22149aep	t22149aep|NAS4_CAEEL	PF01400.24	Astacin	P55112|NAS4_CAEEL Zinc metalloproteinase nas-4 OS=Caenorhabditis elegans	5.73e-41	PREDICTED: astacin-like metalloprotease toxin 5 [Hydra vulgaris]	1.84e-174	NAS4_CAEEL	FALSE	0.97953	564	1	1.95906	0	i_granular_mucous_gland_cell,i_zymogen_gland_cell	interstitial	i_granular_mucous_gland_cell,i_gland_cell	head,body
t36274aep	t36274aep					PREDICTED: probable serine/threonine-protein kinase kinX isoform X1 [Hydra vulgaris]	6.73e-94		FALSE	0.978743	565	1	1.88873	0.0687566	enEp-nb(pd),enEp-nem(pd),enEp_foot,enEp_head,enEp_SC1,enEp_stem_cell	endoderm	enEp-nb,enEp-nem,enEp_foot,enEp_head,enEp_SC1,enEp_stem_cell	body,head,foot
t16296aep	t16296aep|NAS4_CAEEL	PF01400.24;PF01549.24	Astacin;ShK	P55112|NAS4_CAEEL Zinc metalloproteinase nas-4 OS=Caenorhabditis elegans	6.81e-44	PREDICTED: zinc metalloproteinase nas-4-like [Hydra vulgaris]	0	NAS4_CAEEL	FALSE	0.97737	566	1	1.95474	0	i_granular_mucous_gland_cell,i_zymogen_gland_cell	interstitial	i_granular_mucous_gland_cell,i_gland_cell	head,body
t13280aep	t13280aep|SPEG_HUMAN	PF00069.25;PF07714.17;PF07679.16;PF13927.6;PF00047.25;PF13895.6	Pkinase;Pkinase_Tyr;I-set;Ig_3;ig;Ig_2	Q15772|SPEG_HUMAN Striated muscle preferentially expressed protein kinase OS=Homo sapiens (Human)	5.61e-51	PREDICTED: myosin light chain kinase, smooth muscle-like [Hydra vulgaris]	0	SPEG_HUMAN	FALSE	0.977363	567	2	1.72275	0.231976	ecEp_basal_disk,ecEp_battery_cell1(mp),ecEp_battery_cell2(mp),ecEp_head,ecEp_stem_cell,i_neuron_ec1	ectoderm	ecEp_basal_disk,ecEp_battery_cell,ecEp_head,ecEp_stem_cell,i_neuron_ec	foot,head,body,nerve net
t5530aep	t5530aep|SRSF6_RAT	PF00076.22	RRM_1	G3V6S8|SRSF6_RAT Serine/arginine-rich splicing factor 6 OS=Rattus norvegicus (Rat)	2.62e-37	PREDICTED: serine/arginine-rich splicing factor 5-like [Hydra vulgaris]	1.58e-145	SRSF6_RAT	FALSE	0.975596	569	2	1.57282	0.378372	i_female_germline1,i_nb1,i_nb2,i_neuron/gland_cell_progenitor,i_neuron_progenitor,i_stem_cell/progenitor	germ line,interstitial	i_female_germline,i_nb,i_neuron_progenitor,i_stem_cell_progenitor	body
t11657aep	t11657aep|EIF3G_DANRE	PF12353.8;PF00076.22	eIF3g;RRM_1	Q6DRC4|EIF3G_DANRE Eukaryotic translation initiation factor 3 subunit G {ECO:0000255|HAMAP-Rule:MF_03006} OS=Danio rerio (Zebrafish) (Brachydanio rerio)	2.1e-97	PREDICTED: eukaryotic translation initiation factor 3 subunit G-like [Hydra vulgaris]	0	EIF3G_DANRE	FALSE	0.970923	570	2	1.73809	0.203756	i_female_germline1,i_nb1,i_nb2,i_neuron/gland_cell_progenitor,i_stem_cell/progenitor	germ line,interstitial	i_female_germline,i_nb,i_neuron_progenitor,i_stem_cell_progenitor	body
t26458aep	t26458aep|PRC2C_MOUSE	PF07001.11	BAT2_N	Q3TLH4|PRC2C_MOUSE Protein PRRC2C OS=Mus musculus (Mouse)	3.53e-17	PREDICTED: protein PRRC2C-like, partial [Hydra vulgaris]	0	PRC2C_MOUSE	FALSE	0.964665	572	1	1.92933	0	i_male_germline,i_nb1,i_nb2	germ line,interstitial	i_male_germline,i_nb	body
t12724aep	t12724aep|GNAS_HOMAM	PF00503.20;PF00025.21	G-alpha;Arf	O16118|GNAS_HOMAM Guanine nucleotide-binding protein G(s) subunit alpha OS=Homarus americanus (American lobster)	0	Gs protein alpha subunit [Tripedalia cystophora]	0	GNAS_HOMAM	FALSE	0.964409	573	2	1.63851	0.290307	i_neuron_ec3	ectoderm	i_neuron_ec	nerve net
t15543aep	t15543aep|EIF3D_DANRE	PF05091.12	eIF-3_zeta	Q6TH15|EIF3D_DANRE Eukaryotic translation initiation factor 3 subunit D {ECO:0000255|HAMAP-Rule:MF_03003} OS=Danio rerio (Zebrafish) (Brachydanio rerio)	0	PREDICTED: eukaryotic translation initiation factor 3 subunit D-like [Hydra vulgaris]	0	EIF3D_DANRE	FALSE	0.961479	575	2	1.65732	0.265638	i_nb1,i_nb2,i_neuron/gland_cell_progenitor,i_neuron_progenitor,i_SC,i_stem_cell/progenitor	interstitial	i_nb,i_neuron_progenitor,i_SC,i_stem_cell_progenitor	body
t26397aep	t26397aep|FBN1_MOUSE	PF07645.15;PF12662.7;PF14670.6;PF12661.7;PF12947.7;PF06247.11;PF00008.27;PF12946.7	EGF_CA;cEGF;FXa_inhibition;hEGF;EGF_3;Plasmod_Pvs28;EGF;EGF_MSP1_1	Q61554|FBN1_MOUSE Fibrillin-1 OS=Mus musculus (Mouse)	1.3e-55	PREDICTED: fibrillin-1-like, partial [Hydra vulgaris]	0	FBN1_MOUSE	FALSE	0.951789	576	1	1.80991	0.0936675	ecEp_battery_cell1(mp),ecEp_battery_cell2(mp)	ectoderm	ecEp_battery_cell	head
t770aep	t770aep|PURA_HUMAN	PF04845.13	PurA	Q00577|PURA_HUMAN Transcriptional activator protein Pur-alpha OS=Homo sapiens (Human)	1.81e-50	PREDICTED: transcriptional activator protein Pur-alpha-like [Hydra vulgaris]	4.96e-159	PURA_HUMAN	FALSE	0.95085	577	2	1.51318	0.38852	enEp_SC1,enEp_stem_cell,i_female_germline1,i_female_germline2_nurse,i_neuron/gland_cell_progenitor,i_SC,i_stem_cell/progenitor	endoderm,germ line,interstitial	enEp_SC1,enEp_stem_cell,i_female_germline,i_neuron_progenitor,i_SC,i_stem_cell_progenitor	body
t19270aep	t19270aep								FALSE	0.9504	578	2	0.941688	0.959112	i_granular_mucous_gland_cell,i_neuron_en3,i_zymogen_gland_cell	interstitial,endoderm	i_granular_mucous_gland_cell,i_neuron_en,i_gland_cell	head,nerve net,body
t7291aep	t7291aep|ALDOA_RAT	PF00274.19	Glycolytic	P05065|ALDOA_RAT Fructose-bisphosphate aldolase A OS=Rattus norvegicus (Rat)	5.68e-161	PREDICTED: fructose-bisphosphate aldolase A-like [Hydra vulgaris]	0	ALDOA_RAT	FALSE	0.948949	579	2	1.6337	0.264198	enEp-nb(pd),enEp-nem(pd),enEp_foot,enEp_head,enEp_SC1,enEp_stem_cell,enEp_tent-nem(pd),enEp_tentacle	endoderm	enEp-nb,enEp-nem,enEp_foot,enEp_head,enEp_SC1,enEp_stem_cell,enEp_tent-nem,enEp_tentacle	body,head,foot
t25828aep	t25828aep|TCPZ_MOUSE	PF00118.24	Cpn60_TCP1	P80317|TCPZ_MOUSE T-complex protein 1 subunit zeta OS=Mus musculus (Mouse)	0	PREDICTED: T-complex protein 1 subunit zeta-like [Hydra vulgaris]	0	TCPZ_MOUSE	FALSE	0.946103	580	2	1.55309	0.339117	i_nb1,i_nb2,i_neuron/gland_cell_progenitor,i_SC,i_stem_cell/progenitor	interstitial	i_nb,i_neuron_progenitor,i_SC,i_stem_cell_progenitor	body
t10266aep	t10266aep								FALSE	0.936581	586	2	1.56901	0.304151	enEp-nb(pd),enEp-nem(pd),enEp_foot,enEp_head,enEp_SC1,enEp_stem_cell	endoderm	enEp-nb,enEp-nem,enEp_foot,enEp_head,enEp_SC1,enEp_stem_cell	body,head,foot
t14065aep	t14065aep|RD23A_BOVIN	PF00627.31;PF09280.11;PF00240.23;PF11976.8	UBA;XPC-binding;ubiquitin;Rad60-SLD	A3KMV2|RD23A_BOVIN UV excision repair protein RAD23 homolog A OS=Bos taurus (Bovine)	9.35e-54	PREDICTED: UV excision repair protein RAD23 homolog B-like [Hydra vulgaris]	0	RD23A_BOVIN	FALSE	0.93337	588	1	1.69732	0.16942	i_male_germline,i_neuron_progenitor	germ line,interstitial	i_male_germline,i_neuron_progenitor	body
t22752aep	t22752aep|B2CL2_MOUSE	PF00452.19	Bcl-2	P70345|B2CL2_MOUSE Bcl-2-like protein 2 OS=Mus musculus (Mouse)	4.23e-22	bcl-2-like protein 1-like [Hydra vulgaris] >gi|828204274|ref|XP_012556216.1| PREDICTED: bcl-2-like protein 1-like isoform X1 [Hydra vulgaris] >gi|154705494|gb|ABS84173.1| bcl-2-like 4 [Hydra vulgaris]	2.55e-117	B2CL2_MOUSE	FALSE	0.933256	589	1	1.76316	0.103352	ecEp_battery_cell1(mp),i_neuron_ec4,i_neuron_en1,i_neuron_progenitor	ectoderm,endoderm,interstitial	ecEp_battery_cell,i_neuron_ec,i_neuron_en,i_neuron_progenitor	head,nerve net,body
t18238aep	t18238aep|NAS4_CAEEL	PF01400.24	Astacin	P55112|NAS4_CAEEL Zinc metalloproteinase nas-4 OS=Caenorhabditis elegans	1.36e-51	PREDICTED: high choriolytic enzyme 1-like [Hydra vulgaris]	0	NAS4_CAEEL	FALSE	0.930122	592	2	1.48021	0.380033	enEp_foot,enEp_head,enEp_tent-nem(pd),enEp_tentacle	endoderm	enEp_foot,enEp_head,enEp_tent-nem,enEp_tentacle	foot,head
t6836aep	t6836aep|EIF3H_NEMVE	PF01398.21	JAB	A7SA47|EIF3H_NEMVE Eukaryotic translation initiation factor 3 subunit H {ECO:0000255|HAMAP-Rule:MF_03007} OS=Nematostella vectensis (Starlet sea anemone)	2.55e-123	PREDICTED: eukaryotic translation initiation factor 3 subunit H-like [Hydra vulgaris]	1.43e-174	EIF3H_NEMVE	FALSE	0.930044	593	2	1.23546	0.624628	i_female_germline1,i_male_germline,i_nb1,i_nb2,i_neuron/gland_cell_progenitor,i_neuron_progenitor,i_SC,i_stem_cell/progenitor	germ line,interstitial	i_female_germline,i_male_germline,i_nb,i_neuron_progenitor,i_SC,i_stem_cell_progenitor	body
t5545aep	t5545aep					PREDICTED: kinectin-like [Hydra vulgaris]	0		FALSE	0.928147	595	1	1.75678	0.0995137	ecEp_basal_disk,ecEp_head,ecEp_stem_cell	ectoderm	ecEp_basal_disk,ecEp_head,ecEp_stem_cell	foot,head,body
t13968aep	t13968aep|IF2A_HUMAN	PF07541.12;PF00575.23	EIF_2_alpha;S1	P05198|IF2A_HUMAN Eukaryotic translation initiation factor 2 subunit 1 OS=Homo sapiens (Human)	1.59e-146	PREDICTED: eukaryotic translation initiation factor 2 subunit 1-like [Hydra vulgaris]	0	IF2A_HUMAN	FALSE	0.927825	596	2	1.60596	0.24969	i_nb1,i_nb2,i_neuron/gland_cell_progenitor,i_neuron_progenitor,i_SC,i_stem_cell/progenitor	interstitial	i_nb,i_neuron_progenitor,i_SC,i_stem_cell_progenitor	body
t13951aep	t13951aep|EIF3B_MOUSE	PF08662.11;PF00076.22	eIF2A;RRM_1	Q8JZQ9|EIF3B_MOUSE Eukaryotic translation initiation factor 3 subunit B {ECO:0000255|HAMAP-Rule:MF_03001} OS=Mus musculus (Mouse)	0	PREDICTED: eukaryotic translation initiation factor 3 subunit B-like [Hydra vulgaris]	0	EIF3B_MOUSE	FALSE	0.926133	597	1	1.80879	0.0434759	i_female_germline1,i_nb1,i_nb2,i_neuron/gland_cell_progenitor,i_SC,i_stem_cell/progenitor	germ line,interstitial	i_female_germline,i_nb,i_neuron_progenitor,i_SC,i_stem_cell_progenitor	body
t22115aep	t22115aep|HEXP_LEIMA	PF00098.23;PF14787.6	zf-CCHC;zf-CCHC_5	Q04832|HEXP_LEIMA DNA-binding protein HEXBP OS=Leishmania major	3.06e-37	PREDICTED: cellular nucleic acid-binding protein-like [Hydra vulgaris]	3.21e-133	HEXP_LEIMA	FALSE	0.925885	598	1	1.85177	0	i_female_germline1,i_SC,i_stem_cell/progenitor	germ line,interstitial	i_female_germline,i_SC,i_stem_cell_progenitor	body
t19448aep	t19448aep|CATZ_RAT	PF00112.23	Peptidase_C1	Q9R1T3|CATZ_RAT Cathepsin Z OS=Rattus norvegicus (Rat)	4.62e-124	PREDICTED: cathepsin Z-like [Hydra vulgaris]	0	CATZ_RAT	FALSE	0.923654	599	1	1.76791	0.0793984	ecEp_battery_cell1(mp),ecEp_battery_cell2(mp),enEp-nb(pd),enEp-nem(pd),enEp_foot,enEp_head,enEp_SC1,enEp_stem_cell,enEp_tent-nem(pd),enEp_tentacle	ectoderm,endoderm	ecEp_battery_cell,enEp-nb,enEp-nem,enEp_foot,enEp_head,enEp_SC1,enEp_stem_cell,enEp_tent-nem,enEp_tentacle	head,body,foot
t13949aep	t13949aep|TCPA_MONDO	PF00118.24	Cpn60_TCP1	Q9XT06|TCPA_MONDO T-complex protein 1 subunit alpha OS=Monodelphis domestica (Gray short-tailed opossum)	0	PREDICTED: T-complex protein 1 subunit alpha-like [Hydra vulgaris]	0	TCPA_MONDO	FALSE	0.922509	600	2	1.57924	0.265779	i_female_germline1,i_nb1,i_nb2,i_neuron/gland_cell_progenitor,i_neuron_progenitor,i_stem_cell/progenitor	germ line,interstitial	i_female_germline,i_nb,i_neuron_progenitor,i_stem_cell_progenitor	body
t27862aep	t27862aep|SRC8_RAT	PF02218.15	HS1_rep	Q66HL2|SRC8_RAT Src substrate cortactin OS=Rattus norvegicus (Rat)	3.33e-89	PREDICTED: src substrate cortactin-like [Hydra vulgaris]	2.2e-155	SRC8_RAT	FALSE	0.922034	601	2	1.37872	0.465349	ecEp_battery_cell1(mp),ecEp_battery_cell2(mp),enEp_tentacle	ectoderm,endoderm	ecEp_battery_cell,enEp_tentacle	head
t25654aep	t25654aep|RRBP1_MOUSE			Q99PL5|RRBP1_MOUSE Ribosome-binding protein 1 OS=Mus musculus (Mouse)	1.58e-09	PREDICTED: protein PRRC2C-like [Hydra vulgaris]	0	RRBP1_MOUSE	FALSE	0.919748	602	1	1.77047	0.0690256	i_female_germline2_nurse,i_male_germline,i_nb1,i_nb2,i_neuron_ec1	germ line,interstitial,ectoderm	i_female_germline,i_male_germline,i_nb,i_neuron_ec	body,nerve net
t23277aep	t23277aep|AT1B2_RHIMB	PF00287.18	Na_K-ATPase	P43002|AT1B2_RHIMB Sodium/potassium-transporting ATPase subunit beta-2 OS=Rhinella marina (Cane toad) (Bufo marinus)	2.88e-14	PREDICTED: sodium/potassium-transporting ATPase subunit beta-1-like [Hydra vulgaris] >gi|828221653|ref|XP_012562022.1| PREDICTED: sodium/potassium-transporting ATPase subunit beta-1-like [Hydra vulgaris] >gi|828221657|ref|XP_012562023.1| PREDICTED: sodium/potassium-transporting ATPase subunit beta-1-like [Hydra vulgaris] >gi|828221660|ref|XP_012562024.1| PREDICTED: sodium/potassium-transporting A…	9.44e-172	AT1B2_RHIMB	FALSE	0.919293	603	2	1.30926	0.529327	ecEp_battery_cell1(mp),ecEp_battery_cell2(mp),ecEp_head,enEp_tent-nem(pd),enEp_tentacle,i_female_germline2_nurse,i_neuron_ec4	ectoderm,endoderm,germ line	ecEp_battery_cell,ecEp_head,enEp_tent-nem,enEp_tentacle,i_female_germline,i_neuron_ec	head,body,nerve net
t9807aep	t9807aep|CLH1_MOUSE	PF00637.20;PF01394.20;PF13838.6;PF04053.14	Clathrin;Clathrin_propel;Clathrin_H_link;Coatomer_WDAD	Q68FD5|CLH1_MOUSE Clathrin heavy chain 1 OS=Mus musculus (Mouse)	0	PREDICTED: clathrin heavy chain 1-like [Hydra vulgaris]	0	CLH1_MOUSE	FALSE	0.918564	605	1	1.78098	0.0561472	enEp-nem(pd),enEp_head,enEp_SC1,enEp_stem_cell	endoderm	enEp-nem,enEp_head,enEp_SC1,enEp_stem_cell	head,body
t13626aep	t13626aep								FALSE	0.91751	606	1	1.83502	0	ecEp_battery_cell2(mp),enEp_tent-nem(pd)	ectoderm,endoderm	ecEp_battery_cell,enEp_tent-nem	head
t22032aep	t22032aep|ATC1_ANOGA	PF00122.20;PF00689.21;PF00702.26;PF13246.6;PF00690.26	E1-E2_ATPase;Cation_ATPase_C;Hydrolase;Cation_ATPase;Cation_ATPase_N	Q7PPA5|ATC1_ANOGA Calcium-transporting ATPase sarcoplasmic/endoplasmic reticulum type OS=Anopheles gambiae (African malaria mosquito)	0	predicted protein [Nematostella vectensis] >gi|156226657|gb|EDO47465.1| predicted protein [Nematostella vectensis]	0	ATC1_ANOGA	FALSE	0.914492	609	1	1.76563	0.0633546	ecEp_basal_disk,ecEp_battery_cell1(mp),ecEp_battery_cell2(mp),i_neuron_progenitor	ectoderm,interstitial	ecEp_basal_disk,ecEp_battery_cell,i_neuron_progenitor	foot,head,body
t19308aep	t19308aep|RL1D1_PONAB	PF00687.21	Ribosomal_L1	Q5RCE6|RL1D1_PONAB Ribosomal L1 domain-containing protein 1 OS=Pongo abelii (Sumatran orangutan) (Pongo pygmaeus abelii)	3.1e-28	PREDICTED: ribosomal L1 domain-containing protein 1-like [Hydra vulgaris]	6.82e-159	RL1D1_PONAB	FALSE	0.9104	613	1	1.8208	0	i_female_germline1,i_nb1,i_nb2,i_neuron/gland_cell_progenitor,i_SC,i_stem_cell/progenitor	germ line,interstitial	i_female_germline,i_nb,i_neuron_progenitor,i_SC,i_stem_cell_progenitor	body
t9955aep	t9955aep|FLOT2_DROME	PF01145.25;PF15975.5	Band_7;Flot	O61492|FLOT2_DROME Flotillin-2 OS=Drosophila melanogaster (Fruit fly)	7.88e-152	PREDICTED: flotillin-2-like [Hydra vulgaris]	0	FLOT2_DROME	FALSE	0.910181	614	1	1.63669	0.183672	ecEp_battery_cell1(mp),ecEp_battery_cell2(mp),ecEp_head,ecEp_stem_cell,enEp_foot	ectoderm,endoderm	ecEp_battery_cell,ecEp_head,ecEp_stem_cell,enEp_foot	head,body,foot
t19452aep	t19452aep|LTBP4_HUMAN	PF07645.15;PF12947.7;PF12662.7;PF12661.7;PF14670.6;PF00008.27	EGF_CA;EGF_3;cEGF;hEGF;FXa_inhibition;EGF	Q8N2S1|LTBP4_HUMAN Latent-transforming growth factor beta-binding protein 4 OS=Homo sapiens (Human)	7.19e-51	PREDICTED: latent-transforming growth factor beta-binding protein 4-like [Hydra vulgaris]	0	LTBP4_HUMAN	FALSE	0.90955	615	1	1.8191	0	ecEp_battery_cell1(mp),ecEp_battery_cell2(mp),ecEp_head,ecEp_stem_cell	ectoderm	ecEp_battery_cell,ecEp_head,ecEp_stem_cell	head,body
t24220aep	t24220aep	PF01391.18	Collagen			PREDICTED: uncharacterized LOC101236347 isoform X1 [Hydra vulgaris]	6.44e-35		FALSE	0.907447	616	2	1.59291	0.221985	i_nb2,i_nb3,i_nb4,i_nb5	interstitial	i_nb	body
t10821aep	t10821aep|GLNA_MOUSE	PF00120.24;PF03951.19	Gln-synt_C;Gln-synt_N	P15105|GLNA_MOUSE Glutamine synthetase OS=Mus musculus (Mouse)	0	PREDICTED: glutamine synthetase-like [Hydra vulgaris]	0	GLNA_MOUSE	FALSE	0.907315	617	1	1.6314	0.183229	ecEp_battery_cell1(mp),ecEp_battery_cell2(mp)	ectoderm	ecEp_battery_cell	head
t27213aep	t27213aep|IM23_SCHHA	PF00335.20	Tetraspanin	Q26499|IM23_SCHHA 23 kDa integral membrane protein OS=Schistosoma haematobium (Blood fluke)	2.6e-29	PREDICTED: 23 kDa integral membrane protein-like [Hydra vulgaris]	6.07e-127	IM23_SCHHA	FALSE	0.907292	618	1	1.67368	0.140903	ecEp_basal_disk,ecEp_battery_cell1(mp),ecEp_battery_cell2(mp),ecEp_head,ecEp_stem_cell,enEp-nem(pd),enEp_foot,enEp_head,enEp_SC1,enEp_stem_cell,enEp_tentacle,i_female_germline2_nurse	ectoderm,endoderm,germ line	ecEp_basal_disk,ecEp_battery_cell,ecEp_head,ecEp_stem_cell,enEp-nem,enEp_foot,enEp_head,enEp_SC1,enEp_stem_cell,enEp_tentacle,i_female_germline	foot,head,body
t16862aep	t16862aep|G3P_CRIGR	PF02800.20;PF00044.24	Gp_dh_C;Gp_dh_N	P17244|G3P_CRIGR Glyceraldehyde-3-phosphate dehydrogenase OS=Cricetulus griseus (Chinese hamster) (Cricetulus barabensis griseus)	1.76e-155	PREDICTED: glyceraldehyde-3-phosphate dehydrogenase [Hydra vulgaris]	0	G3P_CRIGR	FALSE	0.906317	619	2	1.30897	0.503664	enEp_foot,enEp_tentacle,i_female_germline1,i_female_germline2_nurse,i_neuron_progenitor	endoderm,germ line,interstitial	enEp_foot,enEp_tentacle,i_female_germline,i_neuron_progenitor	foot,head,body
t2515aep	t2515aep								FALSE	0.904436	620	2	1.45218	0.356693	enEp-nb(pd),enEp-nem(pd),enEp_SC1,enEp_stem_cell	endoderm	enEp-nb,enEp-nem,enEp_SC1,enEp_stem_cell	body,head
t31430aep	t31430aep|ARGI1_HUMAN	PF00491.21	Arginase	P05089|ARGI1_HUMAN Arginase-1 OS=Homo sapiens (Human)	5.92e-77	PREDICTED: arginase-1-like [Hydra vulgaris]	0	ARGI1_HUMAN	FALSE	0.900692	623	2	1.28991	0.511474	ecEp_stem_cell,enEp_tent-nem(pd),enEp_tentacle	ectoderm,endoderm	ecEp_stem_cell,enEp_tent-nem,enEp_tentacle	body,head
t36424aep	t36424aep|Y1101_SYNY3	PF00582.26	Usp	P72745|Y1101_SYNY3 Universal stress protein Slr1101 OS=Synechocystis sp	1.33e-13	PREDICTED: universal stress protein A-like protein [Hydra vulgaris]	6.83e-108	Y1101_SYNY3	FALSE	0.899257	624	2	1.58426	0.214253	i_nb2	interstitial	i_nb	body
t29479aep	t29479aep|OST48_PONAB	PF03345.14	DDOST_48kD	Q5R501|OST48_PONAB Dolichyl-diphosphooligosaccharide--protein glycosyltransferase 48 kDa subunit OS=Pongo abelii (Sumatran orangutan) (Pongo pygmaeus abelii)	0	PREDICTED: dolichyl-diphosphooligosaccharide--protein glycosyltransferase 48 kDa subunit-like [Hydra vulgaris]	0	OST48_PONAB	FALSE	0.898264	626	1	1.73504	0.0614874	ecEp_basal_disk,i_female_germline2_nurse,i_nb1,i_nb2,i_nb3	ectoderm,germ line,interstitial	ecEp_basal_disk,i_female_germline,i_nb	foot,body
t33559aep	t33559aep|MYPH_ECHGR	PF00307.31	CH	Q24799|MYPH_ECHGR Myophilin OS=Echinococcus granulosus (Hydatid tapeworm)	2.35e-35	PREDICTED: myophilin-like [Hydra vulgaris]	8.66e-119	MYPH_ECHGR	FALSE	0.896423	627	1	1.59666	0.196185	ecEp_basal_disk,enEp-nb(pd),enEp-nem(pd),enEp_foot,enEp_head,enEp_SC1,enEp_stem_cell,enEp_tentacle	ectoderm,endoderm	ecEp_basal_disk,enEp-nb,enEp-nem,enEp_foot,enEp_head,enEp_SC1,enEp_stem_cell,enEp_tentacle	foot,body,head
t13670aep	t13670aep|FAXC_MOUSE	PF17172.4;PF17171.4	GST_N_4;GST_C_6	Q3UMF9|FAXC_MOUSE Failed axon connections homolog OS=Mus musculus (Mouse)	3.79e-46	PREDICTED: failed axon connections homolog [Hydra vulgaris]	0	FAXC_MOUSE	FALSE	0.893672	628	2	1.58422	0.203125	ecEp_battery_cell1(mp),ecEp_battery_cell2(mp),ecEp_stem_cell,i_neuron_ec1,i_neuron_ec2,i_neuron_ec3,i_neuron_ec4,i_neuron_ec5,i_neuron_en1,i_neuron_progenitor	ectoderm,endoderm,interstitial	ecEp_battery_cell,ecEp_stem_cell,i_neuron_ec,i_neuron_en,i_neuron_progenitor	head,body,nerve net
t4921aep	t4921aep|CCNI_HUMAN	PF00134.23	Cyclin_N	Q14094|CCNI_HUMAN Cyclin-I OS=Homo sapiens (Human)	1.95e-23	PREDICTED: cyclin-G1-like [Hydra vulgaris]	0	CCNI_HUMAN	FALSE	0.892684	629	2	1.32624	0.459128	ecEp_battery_cell1(mp),ecEp_battery_cell2(mp),enEp_head,enEp_tent-nem(pd),i_nematocyte,i_neuron_ec2	ectoderm,endoderm,interstitial	ecEp_battery_cell,enEp_head,enEp_tent-nem,i_nematocyte,i_neuron_ec	head,nerve net
t10541aep	t10541aep|GBRL2_RAT	PF02991.16	Atg8	P60522|GBRL2_RAT Gamma-aminobutyric acid receptor-associated protein-like 2 OS=Rattus norvegicus (Rat)	1.15e-57	PREDICTED: gamma-aminobutyric acid receptor-associated protein-like 2 [Hydra vulgaris]	2.81e-79	GBRL2_RAT	FALSE	0.889857	630	2	1.45275	0.326964	ecEp_battery_cell2(mp),enEp-nem(pd),enEp_tent-nem(pd),i_male_germline,i_nematocyte,i_neuron_ec2	ectoderm,endoderm,germ line,interstitial	ecEp_battery_cell,enEp-nem,enEp_tent-nem,i_male_germline,i_nematocyte,i_neuron_ec	head,body,nerve net
t4860aep	t4860aep|ENOA_HUMAN	PF00113.22;PF03952.16	Enolase_C;Enolase_N	P51913|ENOA_CHICK Alpha-enolase OS=Gallus gallus (Chicken)	0	PREDICTED: alpha-enolase-like [Hydra vulgaris]	0	ENOA_HUMAN	FALSE	0.882112	632	2	1.40123	0.362994	enEp_foot,enEp_head,enEp_SC1,enEp_tentacle,i_neuron_en2,i_neuron_progenitor	endoderm,interstitial	enEp_foot,enEp_head,enEp_SC1,enEp_tentacle,i_neuron_en,i_neuron_progenitor	foot,head,body,nerve net
t9585aep	t9585aep|MYL6B_HUMAN	PF13405.6;PF13499.6;PF00036.32;PF14658.6	EF-hand_6;EF-hand_7;EF-hand_1;EF-hand_9	P14649|MYL6B_HUMAN Myosin light chain 6B OS=Homo sapiens (Human)	3.24e-36	PREDICTED: myosin light chain 6B-like [Hydra vulgaris]	1.66e-99	MYL6B_HUMAN	FALSE	0.875598	633	2	1.42949	0.321706	ecEp_battery_cell1(mp),ecEp_battery_cell2(mp),ecEp_head,ecEp_stem_cell,i_neuron_ec1	ectoderm	ecEp_battery_cell,ecEp_head,ecEp_stem_cell,i_neuron_ec	head,body,nerve net
t20281aep	t20281aep|BI1_PAROL	PF01027.20	Bax1-I	Q9IA79|BI1_PAROL Probable Bax inhibitor 1 OS=Paralichthys olivaceus (Bastard halibut) (Hippoglossus olivaceus)	2.26e-67	PREDICTED: probable Bax inhibitor 1 [Hydra vulgaris]	1.01e-161	BI1_PAROL	FALSE	0.871757	636	2	1.50474	0.238774	i_nematocyte	interstitial	i_nematocyte	head
t29036aep	t29036aep								FALSE	0.871645	637	2	1.42153	0.321761	enEp_tentacle	endoderm	enEp_tentacle	head
t10530aep	t10530aep|SSRD_MOUSE	PF05404.12	TRAP-delta	Q62186|SSRD_MOUSE Translocon-associated protein subunit delta OS=Mus musculus (Mouse)	2.29e-20	PREDICTED: translocon-associated protein subunit delta-like [Hydra vulgaris]	5.06e-102	SSRD_MOUSE	FALSE	0.871115	638	1	1.74223	0	i_female_germline2_nurse,i_nb1,i_nb2,i_nb3,i_nb4,i_nb5,i_neuron_progenitor	germ line,interstitial	i_female_germline,i_nb,i_neuron_progenitor	body
t34965aep	t34965aep|NDUB7_DICDI	PF05676.13	NDUF_B7	Q54V61|NDUB7_DICDI NADH dehydrogenase [ubiquinone] 1 beta subcomplex subunit 7 OS=Dictyostelium discoideum (Slime mold)	2.37e-09	PREDICTED: NADH dehydrogenase [ubiquinone] 1 beta subcomplex subunit 7-like [Hydra vulgaris]	6.6e-46	NDUB7_DICDI	FALSE	0.870667	639	2	1.03661	0.704724	i_nb1,i_neuron/gland_cell_progenitor,i_SC,i_stem_cell/progenitor	interstitial	i_nb,i_neuron_progenitor,i_SC,i_stem_cell_progenitor	body
t22735aep	t22735aep|ABCE1_MOUSE	PF00005.27;PF04068.15;PF13304.6;PF00037.27	ABC_tran;RLI;AAA_21;Fer4	P61222|ABCE1_MOUSE ATP-binding cassette sub-family E member 1 OS=Mus musculus (Mouse)	0	PREDICTED: ATP-binding cassette sub-family E member 1 [Hydra vulgaris]	0	ABCE1_MOUSE	FALSE	0.870059	640	1	1.59968	0.140438	i_female_germline1,i_nb1,i_nb2,i_neuron/gland_cell_progenitor,i_stem_cell/progenitor	germ line,interstitial	i_female_germline,i_nb,i_neuron_progenitor,i_stem_cell_progenitor	body
t4945aep	t4945aep|MYPH_ECHGR	PF00307.31;PF00402.18	CH;Calponin	Q24799|MYPH_ECHGR Myophilin OS=Echinococcus granulosus (Hydatid tapeworm)	1.84e-51	PREDICTED: myophilin-like [Hydra vulgaris]	2e-140	MYPH_ECHGR	FALSE	0.86924	642	2	1.5224	0.21608	ecEp_basal_disk,ecEp_head,ecEp_stem_cell,i_female_germline2_nurse	ectoderm,germ line	ecEp_basal_disk,ecEp_head,ecEp_stem_cell,i_female_germline	foot,head,body
t16777aep	t16777aep|IPYR_HUMAN	PF00719.19	Pyrophosphatase	Q15181|IPYR_HUMAN Inorganic pyrophosphatase OS=Homo sapiens (Human)	3.21e-105	PREDICTED: uncharacterized protein LOC100215086 [Hydra vulgaris]	0	IPYR_HUMAN	FALSE	0.868506	643	1	1.62996	0.107051	ecEp_head,ecEp_stem_cell,i_female_germline1,i_male_germline,i_nb1,i_nb2,i_neuron/gland_cell_progenitor,i_neuron_progenitor,i_SC,i_stem_cell/progenitor	ectoderm,germ line,interstitial	ecEp_head,ecEp_stem_cell,i_female_germline,i_male_germline,i_nb,i_neuron_progenitor,i_SC,i_stem_cell_progenitor	head,body
t2549aep	t2549aep					PREDICTED: uncharacterized protein LOC100208683 [Hydra vulgaris]	1.8e-114		FALSE	0.86378	645	1	1.72756	0	i_zymogen_gland_cell	interstitial	i_gland_cell	body
t19286aep	t19286aep|ACPM_DROME	PF00550.25	PP-binding	Q94519|ACPM_DROME Acyl carrier protein, mitochondrial OS=Drosophila melanogaster (Fruit fly)	6.92e-23	PREDICTED: acyl carrier protein 2, mitochondrial-like [Hydra vulgaris]	3.27e-89	ACPM_DROME	FALSE	0.860433	647	2	1.40475	0.316115	i_female_germline1,i_nb1,i_neuron/gland_cell_progenitor,i_SC,i_stem_cell/progenitor	germ line,interstitial	i_female_germline,i_nb,i_neuron_progenitor,i_SC,i_stem_cell_progenitor	body
t12617aep	t12617aep|PCCA_HUMAN	PF02786.17;PF00289.22;PF02785.19;PF18140.1;PF00364.22;PF07478.13;PF02222.22	CPSase_L_D2;Biotin_carb_N;Biotin_carb_C;PCC_BT;Biotin_lipoyl;Dala_Dala_lig_C;ATP-grasp	P05165|PCCA_HUMAN Propionyl-CoA carboxylase alpha chain, mitochondrial OS=Homo sapiens (Human)	0	PREDICTED: propionyl-CoA carboxylase alpha chain, mitochondrial [Hydra vulgaris]	0	PCCA_HUMAN	FALSE	0.858065	649	2	1.43456	0.28157	ecEp_basal_disk,ecEp_stem_cell,i_neuron_progenitor	ectoderm,interstitial	ecEp_basal_disk,ecEp_stem_cell,i_neuron_progenitor	foot,body
t20217aep	t20217aep|EIF3M_NEMVE	PF01399.27;PF18005.1	PCI;eIF3m_C_helix	A7SPX9|EIF3M_NEMVE Eukaryotic translation initiation factor 3 subunit M {ECO:0000255|HAMAP-Rule:MF_03012} OS=Nematostella vectensis (Starlet sea anemone)	2.14e-107	PREDICTED: eukaryotic translation initiation factor 3 subunit M-like [Hydra vulgaris]	0	EIF3M_NEMVE	FALSE	0.855623	650	1	1.62372	0.0875265	i_nb1,i_neuron/gland_cell_progenitor,i_SC,i_stem_cell/progenitor	interstitial	i_nb,i_neuron_progenitor,i_SC,i_stem_cell_progenitor	body
t24622aep	t24622aep|TCPB_MACFA	PF00118.24	Cpn60_TCP1	Q4R6F8|TCPB_MACFA T-complex protein 1 subunit beta OS=Macaca fascicularis (Crab-eating macaque) (Cynomolgus monkey)	0	PREDICTED: T-complex protein 1 subunit beta [Hydra vulgaris]	0	TCPB_MACFA	FALSE	0.853843	652	1	1.59739	0.110297	i_female_germline1,i_nb1,i_nb2,i_neuron/gland_cell_progenitor,i_stem_cell/progenitor	germ line,interstitial	i_female_germline,i_nb,i_neuron_progenitor,i_stem_cell_progenitor	body
t1207aep	t1207aep|GXN2_ACRMI			B8UU51|GXN2_ACRMI Galaxin-2 {ECO:0000303|PubMed:23765379} OS=Acropora millepora (Staghorn coral)	5.59e-06	PREDICTED: galaxin-2-like [Lingula anatina]	2.82e-10	GXN2_ACRMI	FALSE	0.852723	653	2	0.388845	1.3166	enEp_stem_cell	endoderm	enEp_stem_cell	body
t17749aep	t17749aep|H2AL_STRPU	PF16211.5;PF00125.24	Histone_H2A_C;Histone	P16886|H2AL_STRPU Late histone H2A.L3 OS=Strongylocentrotus purpuratus (Purple sea urchin)	1.41e-56	PREDICTED: histone H2A-beta, sperm [Hydra vulgaris]	1.16e-59	H2AL_STRPU	FALSE	0.8526	654	2	1.19752	0.50768	i_male_germline,i_nb1	germ line,interstitial	i_male_germline,i_nb	body
t36286aep	t36286aep|CAMT2_DICDI	PF01596.17;PF13578.6	Methyltransf_3;Methyltransf_24	Q86IC8|CAMT2_DICDI Probable caffeoyl-CoA O-methyltransferase 2 OS=Dictyostelium discoideum (Slime mold)	1.82e-46	PREDICTED: probable caffeoyl-CoA O-methyltransferase 2 [Hydra vulgaris]	2.87e-144	CAMT2_DICDI	FALSE	0.85029	655	1	1.55103	0.149551	ecEp_battery_cell1(mp),ecEp_battery_cell2(mp),ecEp_head,ecEp_stem_cell	ectoderm	ecEp_battery_cell,ecEp_head,ecEp_stem_cell	head,body
t19271aep	t19271aep|IF1AY_HUMAN	PF01176.19	eIF-1a	O14602|IF1AY_HUMAN Eukaryotic translation initiation factor 1A, Y-chromosomal OS=Homo sapiens (Human)	5.39e-47	PREDICTED: eukaryotic translation initiation factor 1A, Y-chromosomal-like [Hydra vulgaris]	1.25e-68	IF1AY_HUMAN	FALSE	0.848533	656	2	1.46467	0.232395	i_female_germline1,i_nb1,i_nb2,i_neuron/gland_cell_progenitor,i_SC,i_stem_cell/progenitor	germ line,interstitial	i_female_germline,i_nb,i_neuron_progenitor,i_SC,i_stem_cell_progenitor	body
t34082aep	t34082aep|VATG_MANSE	PF03179.15	V-ATPase_G	Q25532|VATG_MANSE V-type proton ATPase subunit G OS=Manduca sexta (Tobacco hawkmoth) (Tobacco hornworm)	6.54e-29	PREDICTED: V-type proton ATPase subunit G-like [Hydra vulgaris]	1.08e-72	VATG_MANSE	FALSE	0.847292	657	2	1.44934	0.245244	ecEp_battery_cell1(mp),i_nb5	ectoderm,interstitial	ecEp_battery_cell,i_nb	head,body
t1656aep	t1656aep|GDIA_BOVIN	PF00996.18	GDI	P21856|GDIA_BOVIN Rab GDP dissociation inhibitor alpha OS=Bos taurus (Bovine)	0	PREDICTED: rab GDP dissociation inhibitor alpha-like [Hydra vulgaris]	0	GDIA_BOVIN	FALSE	0.84492	658	1	1.55864	0.131201	enEp_SC1,enEp_stem_cell,enEp_tentacle,i_female_germline2_nurse	endoderm,germ line	enEp_SC1,enEp_stem_cell,enEp_tentacle,i_female_germline	body,head
t36351aep	t36351aep|FKBP2_MOUSE	PF00254.28	FKBP_C	P45878|FKBP2_MOUSE Peptidyl-prolyl cis-trans isomerase FKBP2 OS=Mus musculus (Mouse)	5.14e-53	PREDICTED: peptidyl-prolyl cis-trans isomerase FKBP2-like [Hydra vulgaris]	6.89e-95	FKBP2_MOUSE	FALSE	0.839986	659	2	1.15746	0.522513	i_female_germline1,i_nb2	germ line,interstitial	i_female_germline,i_nb	body
t5704aep	t5704aep|ROA1_DROME	PF00076.22;PF16367.5	RRM_1;RRM_7	P07909|ROA1_DROME Heterogeneous nuclear ribonucleoprotein A1 OS=Drosophila melanogaster (Fruit fly)	2.56e-41	PREDICTED: heterogeneous nuclear ribonucleoprotein A2 homolog 2-like [Hydra vulgaris]	3.56e-72	ROA1_DROME	FALSE	0.839741	660	1	1.58264	0.0968429	i_female_germline1,i_female_germline2_nurse,i_nb1,i_neuron/gland_cell_progenitor,i_stem_cell/progenitor	germ line,interstitial	i_female_germline,i_nb,i_neuron_progenitor,i_stem_cell_progenitor	body
t4861aep	t4861aep								FALSE	0.836701	661	2	0.553472	1.11993	i_neuron_ec2,i_neuron_en3	ectoderm,endoderm	i_neuron_ec,i_neuron_en	nerve net
t30671aep	t30671aep|AUR1_SCHPO	PF14378.6	PAP2_3	Q10142|AUR1_SCHPO Inositol phosphorylceramide synthase catalytic subunit aur1 OS=Schizosaccharomyces pombe (strain 972 / ATCC 24843) (Fission yeast)	2.59e-20	PREDICTED: inositol phosphorylceramide synthase catalytic subunit aur1-like [Hydra vulgaris]	0	AUR1_SCHPO	FALSE	0.836563	662	2	1.42302	0.250106	enEp_SC1,enEp_stem_cell	endoderm	enEp_SC1,enEp_stem_cell	body
t25599aep	t25599aep	PF15898.5	PRKG1_interact			PREDICTED: protein phosphatase 1 regulatory subunit 12A-like [Hydra vulgaris]	5.96e-28		FALSE	0.835175	663	2	1.42066	0.24969	ecEp_basal_disk,ecEp_battery_cell1(mp),ecEp_battery_cell2(mp),ecEp_head,ecEp_stem_cell,enEp_foot,enEp_head,enEp_tent-nem(pd),enEp_tentacle	ectoderm,endoderm	ecEp_basal_disk,ecEp_battery_cell,ecEp_head,ecEp_stem_cell,enEp_foot,enEp_head,enEp_tent-nem,enEp_tentacle	foot,head,body
t20522aep	t20522aep|ARF4_XENLA	PF00025.21;PF08477.13;PF09439.10;PF00503.20;PF00071.22;PF04670.12	Arf;Roc;SRPRB;G-alpha;Ras;Gtr1_RagA	P51644|ARF4_XENLA ADP-ribosylation factor 4 OS=Xenopus laevis (African clawed frog)	3.26e-108	PREDICTED: ADP-ribosylation factor 4 [Hydra vulgaris]	4.13e-126	ARF4_XENLA	FALSE	0.834083	665	1	1.55762	0.110547	ecEp_basal_disk	ectoderm	ecEp_basal_disk	foot
t6745aep	t6745aep								FALSE	0.831875	666	1	1.66375	0	ecEp_battery_cell2(mp),enEp-nb(pd),enEp-nem(pd),enEp_foot,enEp_head,enEp_SC1,enEp_stem_cell,enEp_tent-nem(pd),enEp_tentacle	ectoderm,endoderm	ecEp_battery_cell,enEp-nb,enEp-nem,enEp_foot,enEp_head,enEp_SC1,enEp_stem_cell,enEp_tent-nem,enEp_tentacle	head,body,foot
t18000aep	t18000aep					PREDICTED: uncharacterized protein LOC100206920 [Hydra vulgaris]	0		FALSE	0.829611	667	1	1.47046	0.188761	ecEp_head,ecEp_stem_cell,enEp-nem(pd),enEp_foot,enEp_head,enEp_tent-nem(pd),enEp_tentacle	ectoderm,endoderm	ecEp_head,ecEp_stem_cell,enEp-nem,enEp_foot,enEp_head,enEp_tent-nem,enEp_tentacle	head,body,foot
t296aep	t296aep|CO1A2_MOUSE	PF01391.18;PF01410.18	Collagen;COLFI	Q01149|CO1A2_MOUSE Collagen alpha-2(I) chain OS=Mus musculus (Mouse)	5.8e-83	PREDICTED: collagen alpha-1(I) chain-like [Hydra vulgaris]	0	CO1A2_MOUSE	FALSE	0.829281	670	1	1.61594	0.0426228	enEp-nb(pd),enEp-nem(pd),enEp_foot,enEp_head,enEp_SC1,enEp_stem_cell,enEp_tent-nem(pd),enEp_tentacle	endoderm	enEp-nb,enEp-nem,enEp_foot,enEp_head,enEp_SC1,enEp_stem_cell,enEp_tent-nem,enEp_tentacle	body,head,foot
t29450aep	t29450aep					PREDICTED: multiple epidermal growth factor-like domains protein 11 [Hydra vulgaris]	2.88e-174		FALSE	0.825099	674	2	1.23391	0.416289	ecEp_basal_disk,i_granular_mucous_gland_cell,i_spumous_mucous_gland_cell,i_zymogen_gland_cell	ectoderm,interstitial	ecEp_basal_disk,i_granular_mucous_gland_cell,i_gland_cell	foot,head,body
t29732aep	t29732aep|RHAG_CANLF	PF00909.21	Ammonium_transp	Q3BCQ5|RHAG_CANLF Ammonium transporter Rh type A OS=Canis lupus familiaris (Dog) (Canis familiaris)	5.55e-92	PREDICTED: ammonium transporter Rh type A-like [Hydra vulgaris] >gi|828208100|ref|XP_012557535.1| PREDICTED: ammonium transporter Rh type A-like [Hydra vulgaris]	0	RHAG_CANLF	FALSE	0.825071	675	1	1.53224	0.117902	ecEp_battery_cell1(mp),ecEp_battery_cell2(mp),ecEp_head,ecEp_stem_cell	ectoderm	ecEp_battery_cell,ecEp_head,ecEp_stem_cell	head,body
t33849aep	t33849aep|CATL_SARPE	PF00112.23;PF08246.12	Peptidase_C1;Inhibitor_I29	Q26636|CATL_SARPE Cathepsin L OS=Sarcophaga peregrina (Flesh fly) (Boettcherisca peregrina)	3.82e-114	PREDICTED: cathepsin L1-like [Hydra vulgaris]	0	CATL_SARPE	FALSE	0.820027	677	1	1.54927	0.0907833	ecEp_battery_cell1(mp),ecEp_battery_cell2(mp),enEp-nb(pd),enEp-nem(pd),enEp_foot,enEp_head,enEp_SC1,enEp_stem_cell,enEp_tent-nem(pd),enEp_tentacle	ectoderm,endoderm	ecEp_battery_cell,enEp-nb,enEp-nem,enEp_foot,enEp_head,enEp_SC1,enEp_stem_cell,enEp_tent-nem,enEp_tentacle	head,body,foot
t2119aep	t2119aep|FBRL_DROER	PF01269.17	Fibrillarin	Q8I1F4|FBRL_DROER rRNA 2'-O-methyltransferase fibrillarin OS=Drosophila erecta (Fruit fly)	5.33e-146	PREDICTED: rRNA 2'-O-methyltransferase fibrillarin-like isoform X1 [Hydra vulgaris]	5.06e-172	FBRL_DROER	FALSE	0.816224	679	1	1.53398	0.0984685	i_female_germline1,i_nb1,i_nb2,i_neuron/gland_cell_progenitor,i_stem_cell/progenitor	germ line,interstitial	i_female_germline,i_nb,i_neuron_progenitor,i_stem_cell_progenitor	body
t16966aep	t16966aep|DX39B_RAT	PF00270.29;PF00271.31;PF04851.15	DEAD;Helicase_C;ResIII	Q63413|DX39B_RAT Spliceosome RNA helicase Ddx39b OS=Rattus norvegicus (Rat)	0	PREDICTED: spliceosome RNA helicase DDX39B-like [Hydra vulgaris]	0	DX39B_RAT	FALSE	0.81311	680	1	1.51003	0.11619	i_female_germline1,i_female_germline2_nurse,i_nb1,i_nb2,i_neuron/gland_cell_progenitor,i_neuron_progenitor,i_stem_cell/progenitor	germ line,interstitial	i_female_germline,i_nb,i_neuron_progenitor,i_stem_cell_progenitor	body
t37729aep	t37729aep|KPCD3_MOUSE	PF00069.25;PF07714.17;PF00130.22	Pkinase;Pkinase_Tyr;C1_1	Q8K1Y2|KPCD3_MOUSE Serine/threonine-protein kinase D3 OS=Mus musculus (Mouse)	0	PREDICTED: serine/threonine-protein kinase D3-like isoform X1 [Hydra vulgaris] >gi|828201267|ref|XP_012555191.1| PREDICTED: serine/threonine-protein kinase D3-like isoform X1 [Hydra vulgaris]	0	KPCD3_MOUSE	FALSE	0.813091	681	2	1.29203	0.334153	enEp-nem(pd),enEp_foot,enEp_head,enEp_SC1,enEp_stem_cell,enEp_tent-nem(pd),enEp_tentacle,i_spumous_mucous_gland_cell	endoderm,interstitial	enEp-nem,enEp_foot,enEp_head,enEp_SC1,enEp_stem_cell,enEp_tent-nem,enEp_tentacle,i_gland_cell	head,foot,body
t32011aep	t32011aep|SAL_SILAS	PF02140.18	Gal_Lectin	Q9PVW8|SAL_SILAS Rhamnose-binding lectin OS=Silurus asotus (Amur catfish) (Parasilurus asotus)	2.77e-39	PREDICTED: rhamnose-binding lectin-like [Hydra vulgaris]	0	SAL_SILAS	FALSE	0.812845	682	1	1.62569	0	ecEp_basal_disk	ectoderm	ecEp_basal_disk	foot
t12849aep	t12849aep|SODM_MACFA	PF02777.18;PF00081.22	Sod_Fe_C;Sod_Fe_N	Q8HXP2|SODM_MACMU Superoxide dismutase [Mn], mitochondrial OS=Macaca mulatta (Rhesus macaque)	2.63e-99	manganese superoxide dismutase [Hydra vulgaris]	6e-156	SODM_MACFA	FALSE	0.811405	683	2	1.11943	0.50338	i_neuron/gland_cell_progenitor,i_SC,i_stem_cell/progenitor	interstitial	i_neuron_progenitor,i_SC,i_stem_cell_progenitor	body
t24550aep	t24550aep|RAC1_RAT	PF00071.22;PF08477.13;PF00025.21	Ras;Roc;Arf	Q6RUV5|RAC1_RAT Ras-related C3 botulinum toxin substrate 1 OS=Rattus norvegicus (Rat)	3.55e-107	PREDICTED: ras-related C3 botulinum toxin substrate 1 [Hydra vulgaris]	2.09e-114	RAC1_RAT	FALSE	0.810215	684	2	1.38687	0.233561	ecEp_battery_cell1(mp),ecEp_battery_cell2(mp),enEp-nb(pd),enEp-nem(pd),enEp_foot,enEp_head,enEp_SC1,enEp_stem_cell,i_nematocyte	ectoderm,endoderm,interstitial	ecEp_battery_cell,enEp-nb,enEp-nem,enEp_foot,enEp_head,enEp_SC1,enEp_stem_cell,i_nematocyte	head,body,foot
t13187aep	t13187aep|GDIR1_RAT	PF02115.17	Rho_GDI	Q5XI73|GDIR1_RAT Rho GDP-dissociation inhibitor 1 {ECO:0000250|UniProtKB:P19803} OS=Rattus norvegicus (Rat)	2.38e-69	PREDICTED: rho GDP-dissociation inhibitor 1-like [Hydra vulgaris]	5.45e-140	GDIR1_RAT	FALSE	0.809626	685	1	1.42647	0.192782	ecEp_battery_cell1(mp),ecEp_battery_cell2(mp),ecEp_head,ecEp_stem_cell,enEp_foot,enEp_tentacle,i_nematocyte	ectoderm,endoderm,interstitial	ecEp_battery_cell,ecEp_head,ecEp_stem_cell,enEp_foot,enEp_tentacle,i_nematocyte	head,body,foot
t11767aep	t11767aep					PREDICTED: glutamic acid-rich protein-like isoform X1 [Hydra vulgaris]	1.43e-26		FALSE	0.808316	686	1	1.44019	0.176442	ecEp_basal_disk,ecEp_battery_cell1(mp),ecEp_battery_cell2(mp),ecEp_head,ecEp_stem_cell	ectoderm	ecEp_basal_disk,ecEp_battery_cell,ecEp_head,ecEp_stem_cell	foot,head,body
t26291aep	t26291aep|RC3H1_HUMAN	PF18386.1;PF13445.6	ROQ_II;zf-RING_UBOX	Q5TC82|RC3H1_HUMAN Roquin-1 OS=Homo sapiens (Human)	0	PREDICTED: uncharacterized protein LOC100214183 [Hydra vulgaris]	0	RC3H1_HUMAN	FALSE	0.801415	691	1	1.60283	0	ecEp_battery_cell1(mp),ecEp_battery_cell2(mp)	ectoderm	ecEp_battery_cell	head
t34113aep	t34113aep|SPCS1_DROME	PF06645.13	SPC12	Q9VAL0|SPCS1_DROME Signal peptidase complex subunit 1 OS=Drosophila melanogaster (Fruit fly)	1.65e-23	PREDICTED: signal peptidase complex subunit 1-like [Hydra vulgaris]	5.19e-65	SPCS1_DROME	FALSE	0.80132	692	1	1.60264	0	i_nb1,i_nb2,i_nb3,i_neuron/gland_cell_progenitor,i_spumous_mucous_gland_cell	interstitial	i_nb,i_neuron_progenitor,i_gland_cell	body,head
t22103aep	t22103aep|U2AF4_BOVIN	PF00642.24	zf-CCCH	Q3T127|U2AF4_BOVIN Splicing factor U2AF 26 kDa subunit OS=Bos taurus (Bovine)	5.55e-105	PREDICTED: splicing factor U2AF 26 kDa subunit-like isoform X1 [Hydra vulgaris] >gi|828219302|ref|XP_012561244.1| PREDICTED: splicing factor U2AF 26 kDa subunit-like isoform X2 [Hydra vulgaris]	2.3e-133	U2AF4_BOVIN	FALSE	0.800933	693	1	1.50071	0.101157	i_female_germline1,i_male_germline,i_nb1,i_neuron/gland_cell_progenitor,i_stem_cell/progenitor	germ line,interstitial	i_female_germline,i_male_germline,i_nb,i_neuron_progenitor,i_stem_cell_progenitor	body
t31013aep	t31013aep|CSL3_ONCKE	PF02140.18	Gal_Lectin	P86179|CSL3_ONCKE L-rhamnose-binding lectin CSL3 {ECO:0000303|Ref.1} OS=Oncorhynchus keta (Chum salmon) (Salmo keta)	1.52e-39	PREDICTED: rhamnose-binding lectin-like [Hydra vulgaris]	1.45e-89	CSL3_ONCKE	FALSE	0.793853	696	2	1.03111	0.556597	ecEp_basal_disk	ectoderm	ecEp_basal_disk	foot
t1696aep	t1696aep|WDR1_DROME	PF00400.32;PF12894.7;PF08662.11;PF07676.12	WD40;ANAPC4_WD40;eIF2A;PD40	Q9VU68|WDR1_DROME Actin-interacting protein 1 OS=Drosophila melanogaster (Fruit fly)	0	PREDICTED: WD repeat-containing protein 1-A-like isoform X1 [Hydra vulgaris]	0	WDR1_DROME	FALSE	0.791459	697	2	1.33357	0.249349	ecEp_battery_cell1(mp),ecEp_battery_cell2(mp),ecEp_head,ecEp_stem_cell,enEp_foot,enEp_tentacle	ectoderm,endoderm	ecEp_battery_cell,ecEp_head,ecEp_stem_cell,enEp_foot,enEp_tentacle	head,body,foot
t17117aep	t17117aep	PF00452.19	Bcl-2			uncharacterized LOC101237999 [Hydra vulgaris] >gi|154705492|gb|ABS84172.1| bcl-2-like 5 [Hydra vulgaris]	4.03e-142		FALSE	0.791173	699	2	1.18322	0.399126	ecEp_basal_disk,ecEp_stem_cell,enEp_SC1	ectoderm,endoderm	ecEp_basal_disk,ecEp_stem_cell,enEp_SC1	foot,body
t22140aep	t22140aep|HNRL1_MOUSE	PF02037.27;PF13671.6	SAP;AAA_33	Q8VDM6|HNRL1_MOUSE Heterogeneous nuclear ribonucleoprotein U-like protein 1 OS=Mus musculus (Mouse)	4.99e-78	PREDICTED: heterogeneous nuclear ribonucleoprotein U-like isoform X1 [Hydra vulgaris]	0	HNRL1_MOUSE	FALSE	0.788906	700	1	1.5042	0.0736111	i_female_germline1,i_nb1,i_neuron/gland_cell_progenitor,i_neuron_progenitor,i_stem_cell/progenitor	germ line,interstitial	i_female_germline,i_nb,i_neuron_progenitor,i_stem_cell_progenitor	body
t29035aep	t29035aep	PF01391.18	Collagen			TPA_exp: minicollagen 7 [Hydra vulgaris]	1.33e-15		FALSE	0.787875	701	1	1.57575	0	enEp-nb(pd),i_nb3,i_nb4,i_nb5,i_nematocyte	endoderm,interstitial	enEp-nb,i_nb,i_nematocyte	body,head
t11717aep	t11717aep|SRC8_RAT	PF02218.15;PF14604.6;PF00018.28;PF07653.17	HS1_rep;SH3_9;SH3_1;SH3_2	Q66HL2|SRC8_RAT Src substrate cortactin OS=Rattus norvegicus (Rat)	2.33e-45	PREDICTED: src substrate cortactin-like [Hydra vulgaris]	2.33e-135	SRC8_RAT	FALSE	0.78777	702	1	1.57554	0	ecEp_battery_cell1(mp),ecEp_battery_cell2(mp),enEp_tentacle	ectoderm,endoderm	ecEp_battery_cell,enEp_tentacle	head
t29656aep	t29656aep|ZFR_PONAB	PF07528.14;PF12874.7;PF12171.8	DZF;zf-met;zf-C2H2_jaz	Q5REX3|ZFR_PONAB Zinc finger RNA-binding protein OS=Pongo abelii (Sumatran orangutan) (Pongo pygmaeus abelii)	1.03e-122	PREDICTED: zinc finger RNA-binding protein-like [Hydra vulgaris]	0	ZFR_PONAB	FALSE	0.785002	704	1	1.40681	0.163193	i_female_germline1,i_nb1,i_nb2,i_neuron/gland_cell_progenitor,i_stem_cell/progenitor	germ line,interstitial	i_female_germline,i_nb,i_neuron_progenitor,i_stem_cell_progenitor	body
t22771aep	t22771aep|CDC42_CHICK	PF00071.22;PF08477.13;PF00025.21	Ras;Roc;Arf	Q90694|CDC42_CHICK Cell division control protein 42 homolog OS=Gallus gallus (Chicken)	3.9e-118	PREDICTED: cell division control protein 42 homolog [Hydra vulgaris]	4.84e-126	CDC42_CHICK	FALSE	0.784614	705	2	1.34306	0.226168	ecEp_battery_cell1(mp),ecEp_battery_cell2(mp),ecEp_head,ecEp_stem_cell,enEp-nem(pd),enEp_foot,enEp_head,enEp_tentacle	ectoderm,endoderm	ecEp_battery_cell,ecEp_head,ecEp_stem_cell,enEp-nem,enEp_foot,enEp_head,enEp_tentacle	head,body,foot
t24952aep	t24952aep					PREDICTED: uncharacterized protein LOC100201038 [Hydra vulgaris]	0		FALSE	0.781367	707	1	1.51185	0.0508845	enEp-nb(pd),enEp-nem(pd),enEp_foot,enEp_head,enEp_SC1,enEp_stem_cell,i_granular_mucous_gland_cell,i_neuron_en2,i_spumous_mucous_gland_cell	endoderm,interstitial	enEp-nb,enEp-nem,enEp_foot,enEp_head,enEp_SC1,enEp_stem_cell,i_granular_mucous_gland_cell,i_neuron_en,i_gland_cell	body,head,foot,nerve net
t29134aep	t29134aep|AP2M1_CHICK	PF00928.21	Adap_comp_sub	Q5ZMP6|AP2M1_CHICK AP-2 complex subunit mu OS=Gallus gallus (Chicken)	0	PREDICTED: AP-2 complex subunit mu-like [Hydra vulgaris]	0	AP2M1_CHICK	FALSE	0.776402	711	2	1.22329	0.329514	ecEp_battery_cell1(mp),enEp-nem(pd)	ectoderm,endoderm	ecEp_battery_cell,enEp-nem	head
t20176aep	t20176aep|SH3L3_MOUSE	PF04908.15	SH3BGR	Q91VW3|SH3L3_MOUSE SH3 domain-binding glutamic acid-rich-like protein 3 OS=Mus musculus (Mouse)	2.55e-17	PREDICTED: SH3 domain-binding glutamic acid-rich-like protein 3 [Hydra vulgaris]	1.11e-47	SH3L3_MOUSE	FALSE	0.773648	712	2	1.00348	0.543817	ecEp_battery_cell1(mp),ecEp_battery_cell2(mp),enEp_foot,enEp_head,enEp_SC1,enEp_stem_cell,enEp_tent-nem(pd),enEp_tentacle,i_female_germline2_nurse	ectoderm,endoderm,germ line	ecEp_battery_cell,enEp_foot,enEp_head,enEp_SC1,enEp_stem_cell,enEp_tent-nem,enEp_tentacle,i_female_germline	head,foot,body
t25004aep	t25004aep|TR1L1_XENLA	PF08390.11;PF03798.16	TRAM1;TRAM_LAG1_CLN8	Q6DED0|TR1L1_XENLA Translocating chain-associated membrane protein 1-like 1 OS=Xenopus laevis (African clawed frog)	1.19e-95	PREDICTED: translocating chain-associated membrane protein 1-like 1 [Hydra vulgaris]	0	TR1L1_XENLA	FALSE	0.772985	714	1	1.54597	0	ecEp_basal_disk,i_nb2,i_nb3,i_nb4,i_nb5,i_neuron_progenitor	ectoderm,interstitial	ecEp_basal_disk,i_nb,i_neuron_progenitor	foot,body
t18337aep	t18337aep|CEL3B_MOUSE	PF00089.26;PF13365.6	Trypsin;Trypsin_2	Q9CQ52|CEL3B_MOUSE Chymotrypsin-like elastase family member 3B OS=Mus musculus (Mouse)	6.46e-47	PREDICTED: chymotrypsin-like elastase family member 3B [Hydra vulgaris]	0	CEL3B_MOUSE	FALSE	0.769355	717	1	1.43148	0.107229	i_zymogen_gland_cell	interstitial	i_gland_cell	body
t28750aep	t28750aep|RT10_DANRE	PF00338.22	Ribosomal_S10	Q5SPH9|RT10_DANRE Probable 28S ribosomal protein S10, mitochondrial OS=Danio rerio (Zebrafish) (Brachydanio rerio)	5.44e-35	PREDICTED: probable 28S ribosomal protein S10, mitochondrial [Hydra vulgaris] >gi|828201150|ref|XP_012555158.1| PREDICTED: probable 28S ribosomal protein S10, mitochondrial [Hydra vulgaris]	1.46e-99	RT10_DANRE	FALSE	0.767393	719	2	1.25296	0.281827	enEp_SC1,enEp_stem_cell	endoderm	enEp_SC1,enEp_stem_cell	body
t71aep	t71aep|F16P1_BOVIN	PF00316.20	FBPase	Q3SZB7|F16P1_BOVIN Fructose-1,6-bisphosphatase 1 OS=Bos taurus (Bovine)	4.08e-142	PREDICTED: fructose-1,6-bisphosphatase 1-like [Hydra vulgaris]	0	F16P1_BOVIN	FALSE	0.764309	721	2	1.1244	0.404219	enEp_head,enEp_SC1,enEp_stem_cell,enEp_tentacle,i_female_germline2_nurse	endoderm,germ line	enEp_head,enEp_SC1,enEp_stem_cell,enEp_tentacle,i_female_germline	head,body
t9552aep	t9552aep|ASAH1_MOUSE	PF02275.18;PF15508.6	CBAH;NAAA-beta	Q9WV54|ASAH1_MOUSE Acid ceramidase OS=Mus musculus (Mouse)	3.09e-126	PREDICTED: acid ceramidase-like [Hydra vulgaris]	0	ASAH1_MOUSE	FALSE	0.763628	722	1	1.44916	0.0780967	enEp-nb(pd),enEp-nem(pd),enEp_foot,enEp_head,enEp_SC1,enEp_stem_cell,enEp_tent-nem(pd),enEp_tentacle,i_female_germline2_nurse	endoderm,germ line	enEp-nb,enEp-nem,enEp_foot,enEp_head,enEp_SC1,enEp_stem_cell,enEp_tent-nem,enEp_tentacle,i_female_germline	body,head,foot
t22792aep	t22792aep|RAS2_HYDVU	PF00071.22;PF08477.13;PF00025.21	Ras;Roc;Arf	P38976|RAS2_HYDVU Ras-like protein RAS2 OS=Hydra vulgaris (Hydra) (Hydra attenuata)	2.24e-121	PREDICTED: ras-like protein RAS2 [Hydra vulgaris]	3.08e-120	RAS2_HYDVU	FALSE	0.762863	723	1	1.43766	0.0880659	ecEp_battery_cell1(mp),ecEp_battery_cell2(mp),enEp_tent-nem(pd),enEp_tentacle	ectoderm,endoderm	ecEp_battery_cell,enEp_tent-nem,enEp_tentacle	head
t1925aep	t1925aep					PREDICTED: uncharacterized protein LOC100200796 [Hydra vulgaris]	7.17e-127		FALSE	0.762348	724	2	0.878551	0.646146	ecEp_basal_disk,ecEp_battery_cell1(mp),ecEp_battery_cell2(mp),ecEp_head,ecEp_stem_cell,enEp_foot,enEp_head,enEp_SC1	ectoderm,endoderm	ecEp_basal_disk,ecEp_battery_cell,ecEp_head,ecEp_stem_cell,enEp_foot,enEp_head,enEp_SC1	foot,head,body
t15228aep	t15228aep|MLP3C_HUMAN	PF02991.16	Atg8	Q9BXW4|MLP3C_HUMAN Microtubule-associated proteins 1A/1B light chain 3C OS=Homo sapiens (Human)	1.06e-53	PREDICTED: microtubule-associated proteins 1A/1B light chain 3C-like [Hydra vulgaris]	1.45e-79	MLP3C_HUMAN	FALSE	0.761525	725	2	1.07642	0.446631	ecEp_basal_disk,ecEp_battery_cell1(mp),ecEp_battery_cell2(mp),ecEp_head,ecEp_stem_cell,enEp-nem(pd),enEp_foot,enEp_SC1,enEp_stem_cell,enEp_tentacle	ectoderm,endoderm	ecEp_basal_disk,ecEp_battery_cell,ecEp_head,ecEp_stem_cell,enEp-nem,enEp_foot,enEp_SC1,enEp_stem_cell,enEp_tentacle	foot,head,body
t15524aep	t15524aep|SAHHB_XENLA	PF05221.17;PF00670.21;PF02826.19	AdoHcyase;AdoHcyase_NAD;2-Hacid_dh_C	O93477|SAHHB_XENLA Adenosylhomocysteinase B OS=Xenopus laevis (African clawed frog)	0	PREDICTED: adenosylhomocysteinase-like isoform X1 [Hydra vulgaris]	0	SAHHB_XENLA	FALSE	0.761424	726	2	1.12691	0.395939	enEp-nb(pd),enEp-nem(pd),enEp_SC1,enEp_stem_cell,i_female_germline2_nurse	endoderm,germ line	enEp-nb,enEp-nem,enEp_SC1,enEp_stem_cell,i_female_germline	body,head
t1263aep	t1263aep|CATL1_BOVIN	PF00112.23;PF08246.12	Peptidase_C1;Inhibitor_I29	P25975|CATL1_BOVIN Cathepsin L1 OS=Bos taurus (Bovine)	8.46e-68	PREDICTED: cathepsin L1-like [Hydra vulgaris]	9.02e-148	CATL1_BOVIN	FALSE	0.757366	728	1	1.36256	0.152172	enEp-nb(pd),enEp-nem(pd),enEp_foot,enEp_head,enEp_SC1,enEp_stem_cell,enEp_tent-nem(pd),enEp_tentacle	endoderm	enEp-nb,enEp-nem,enEp_foot,enEp_head,enEp_SC1,enEp_stem_cell,enEp_tent-nem,enEp_tentacle	body,head,foot
t24927aep	t24927aep|VAPB_BOVIN	PF00635.26	Motile_Sperm	A2VDZ9|VAPB_BOVIN Vesicle-associated membrane protein-associated protein B OS=Bos taurus (Bovine)	4.81e-43	PREDICTED: vesicle-associated membrane protein-associated protein B-like [Hydra vulgaris]	8.2e-158	VAPB_BOVIN	FALSE	0.757306	729	2	1.07046	0.444152	i_male_germline,i_nb2	germ line,interstitial	i_male_germline,i_nb	body
t33669aep	t33669aep|CIRBP_LITCT	PF00076.22	RRM_1	Q9PTX2|CIRBP_LITCT Cold-inducible RNA-binding protein {ECO:0000303|PubMed:10817911} OS=Lithobates catesbeiana (American bullfrog) (Rana catesbeiana)	3.07e-15	PREDICTED: glycine-rich RNA-binding protein 10-like isoform X2 [Hydra vulgaris]	8.44e-62	CIRBP_LITCT	FALSE	0.756961	730	2	1.29498	0.218942	i_neuron/gland_cell_progenitor,i_neuron_ec2,i_neuron_progenitor,i_SC,i_stem_cell/progenitor	interstitial,ectoderm	i_neuron_progenitor,i_neuron_ec,i_SC,i_stem_cell_progenitor	body,nerve net
t22150aep	t22150aep|LGMN_BOVIN	PF01650.18	Peptidase_C13	Q95M12|LGMN_BOVIN Legumain OS=Bos taurus (Bovine)	2.55e-148	PREDICTED: legumain-like [Hydra vulgaris]	0	LGMN_BOVIN	FALSE	0.754259	733	2	1.20046	0.308058	enEp-nb(pd),enEp-nem(pd),enEp_foot,enEp_head,enEp_SC1,enEp_stem_cell,enEp_tent-nem(pd),enEp_tentacle	endoderm	enEp-nb,enEp-nem,enEp_foot,enEp_head,enEp_SC1,enEp_stem_cell,enEp_tent-nem,enEp_tentacle	body,head,foot
t16935aep	t16935aep					PREDICTED: uncharacterized protein LOC100204915 [Hydra vulgaris]	1.77e-146		FALSE	0.751952	734	2	1.03749	0.466414	ecEp_battery_cell1(mp),ecEp_battery_cell2(mp),ecEp_head,ecEp_stem_cell	ectoderm	ecEp_battery_cell,ecEp_head,ecEp_stem_cell	head,body
t570aep	t570aep|RPN1_PIG	PF04597.14	Ribophorin_I	Q9GMB0|RPN1_PIG Dolichyl-diphosphooligosaccharide--protein glycosyltransferase subunit 1 OS=Sus scrofa (Pig)	0	PREDICTED: dolichyl-diphosphooligosaccharide--protein glycosyltransferase subunit 1-like [Hydra vulgaris]	0	RPN1_PIG	FALSE	0.750928	735	2	1.21356	0.288296	i_female_germline2_nurse,i_nb1,i_nb2,i_nb3	germ line,interstitial	i_female_germline,i_nb	body
t33270aep	t33270aep|DNJ6B_XENLA	PF00226.31	DnaJ	Q5XGU5|DNJ6B_XENLA DnaJ homolog subfamily B member 6-B OS=Xenopus laevis (African clawed frog)	3.05e-12	PREDICTED: probable serine/threonine-protein kinase DDB_G0268642 [Hydra vulgaris]	1.5e-93	DNJ6B_XENLA	FALSE	0.748349	738	1	1.30128	0.195418	i_neuron/gland_cell_progenitor	interstitial	i_neuron_progenitor	body
t31842aep	t31842aep|TERA_XENLA	PF00004.29;PF17862.1;PF02359.18;PF05496.12;PF13191.6;PF02933.17;PF07724.14;PF13671.6;PF07728.14;PF13401.6;PF06068.13;PF13238.6;PF00910.22;PF13173.6;PF01078.21;PF06745.13;PF01695.17	AAA;AAA_lid_3;CDC48_N;RuvB_N;AAA_16;CDC48_2;AAA_2;AAA_33;AAA_5;AAA_22;TIP49;AAA_18;RNA_helicase;AAA_14;Mg_chelatase;ATPase;IstB_IS21	P23787|TERA_XENLA Transitional endoplasmic reticulum ATPase OS=Xenopus laevis (African clawed frog)	0	PREDICTED: LOW QUALITY PROTEIN: transitional endoplasmic reticulum ATPase-like [Hydra vulgaris]	0	TERA_XENLA	FALSE	0.747009	739	1	1.3781	0.115918	i_male_germline,i_nb1	germ line,interstitial	i_male_germline,i_nb	body
t4928aep	t4928aep|ARPC2_MOUSE	PF04045.14	P34-Arc	Q9CVB6|ARPC2_MOUSE Actin-related protein 2/3 complex subunit 2 OS=Mus musculus (Mouse)	7.67e-147	PREDICTED: actin-related protein 2/3 complex subunit 2-like isoform X2 [Hydra vulgaris] >gi|828203284|ref|XP_012555889.1| PREDICTED: actin-related protein 2/3 complex subunit 2-like isoform X1 [Hydra vulgaris]	0	ARPC2_MOUSE	FALSE	0.745035	741	2	1.27515	0.214919	ecEp_battery_cell1(mp),ecEp_battery_cell2(mp),ecEp_head,ecEp_stem_cell,i_female_germline2_nurse	ectoderm,germ line	ecEp_battery_cell,ecEp_head,ecEp_stem_cell,i_female_germline	head,body
t19446aep	t19446aep|THIOM_HUMAN	PF00085.20;PF13098.6;PF13899.6;PF13905.6	Thioredoxin;Thioredoxin_2;Thioredoxin_7;Thioredoxin_8	Q99757|THIOM_HUMAN Thioredoxin, mitochondrial OS=Homo sapiens (Human)	1.73e-37	PREDICTED: thioredoxin, mitochondrial-like [Hydra vulgaris]	1.28e-85	THIOM_HUMAN	FALSE	0.742784	742	2	0.986146	0.499423	i_nb1,i_nb2	interstitial	i_nb	body
t14973aep	t14973aep|PCR4_ARATH	PF04749.17	PLAC8	Q9LS44|PCR4_ARATH Protein PLANT CADMIUM RESISTANCE 4 OS=Arabidopsis thaliana (Mouse-ear cress)	7.83e-11	PREDICTED: protein PLANT CADMIUM RESISTANCE 4-like [Hydra vulgaris]	1.25e-70	PCR4_ARATH	FALSE	0.739031	743	2	0.880657	0.597404	ecEp_basal_disk,ecEp_head,ecEp_stem_cell	ectoderm	ecEp_basal_disk,ecEp_head,ecEp_stem_cell	foot,head,body
t22315aep	t22315aep|SBSPO_HUMAN	PF00090.19	TSP_1	Q8IVN8|SBSPO_HUMAN Somatomedin-B and thrombospondin type-1 domain-containing protein OS=Homo sapiens (Human)	7.68e-22	PREDICTED: somatomedin-B and thrombospondin type-1 domain-containing protein-like [Hydra vulgaris]	0	SBSPO_HUMAN	FALSE	0.737455	744	2	1.1915	0.283409	enEp-nb(pd),enEp-nem(pd),enEp_foot,enEp_SC1,enEp_tent-nem(pd),enEp_tentacle	endoderm	enEp-nb,enEp-nem,enEp_foot,enEp_SC1,enEp_tent-nem,enEp_tentacle	body,head,foot
t1923aep	t1923aep	PF00822.20;PF13903.6;PF07344.11	PMP22_Claudin;Claudin_2;Amastin			PREDICTED: uncharacterized protein LOC100209915 [Hydra vulgaris] >gi|828227989|ref|XP_012564142.1| PREDICTED: uncharacterized protein LOC100209915 [Hydra vulgaris]	1.89e-131		FALSE	0.737234	745	2	1.06445	0.410018	ecEp_basal_disk,ecEp_battery_cell1(mp),ecEp_battery_cell2(mp),ecEp_head,ecEp_stem_cell	ectoderm	ecEp_basal_disk,ecEp_battery_cell,ecEp_head,ecEp_stem_cell	foot,head,body
t12858aep	t12858aep|MK67I_XENTR	PF00076.22	RRM_1	Q6GL69|MK67I_XENTR MKI67 FHA domain-interacting nucleolar phosphoprotein-like OS=Xenopus tropicalis (Western clawed frog) (Silurana tropicalis)	1.64e-50	PREDICTED: MKI67 FHA domain-interacting nucleolar phosphoprotein-like [Hydra vulgaris]	7.97e-131	MK67I_XENTR	FALSE	0.73657	746	1	1.47314	0	i_female_germline1,i_nb1,i_nb2,i_neuron/gland_cell_progenitor,i_SC,i_stem_cell/progenitor	germ line,interstitial	i_female_germline,i_nb,i_neuron_progenitor,i_SC,i_stem_cell_progenitor	body
t5292aep	t5292aep	PF00822.20	PMP22_Claudin			claudin-18-like [Hydra vulgaris] >gi|828205423|ref|XP_012556607.1| PREDICTED: claudin-18-like [Hydra vulgaris] >gi|873757949|emb|CRX73236.1| Claudin-like 1 [Hydra vulgaris]	1.01e-143		FALSE	0.734527	747	2	1.03829	0.430764	ecEp_basal_disk,ecEp_battery_cell1(mp),ecEp_battery_cell2(mp),ecEp_head,ecEp_stem_cell,enEp_tent-nem(pd)	ectoderm,endoderm	ecEp_basal_disk,ecEp_battery_cell,ecEp_head,ecEp_stem_cell,enEp_tent-nem	foot,head,body
t9542aep	t9542aep|CCD47_PONAB	PF07946.14	DUF1682	Q5RCI4|CCD47_PONAB Coiled-coil domain-containing protein 47 OS=Pongo abelii (Sumatran orangutan) (Pongo pygmaeus abelii)	3.57e-110	PREDICTED: coiled-coil domain-containing protein 47-like [Hydra vulgaris]	0	CCD47_PONAB	FALSE	0.733039	748	1	1.26889	0.197189	i_nb1	interstitial	i_nb	body
t29126aep	t29126aep|SRS11_HUMAN	PF00076.22	RRM_1	Q05519|SRS11_HUMAN Serine/arginine-rich splicing factor 11 OS=Homo sapiens (Human)	1.29e-24	PREDICTED: uncharacterized protein LOC100212876, partial [Hydra vulgaris]	4.38e-64	SRS11_HUMAN	FALSE	0.731369	749	1	1.35238	0.110358	i_female_germline1,i_nb1,i_nb2,i_neuron/gland_cell_progenitor,i_SC,i_stem_cell/progenitor	germ line,interstitial	i_female_germline,i_nb,i_neuron_progenitor,i_SC,i_stem_cell_progenitor	body
t23046aep	t23046aep|AGUA_STRAW	PF04371.15	PAD_porph	Q82JP0|AGUA_STRAW Putative agmatine deiminase {ECO:0000255|HAMAP-Rule:MF_01841} OS=Streptomyces avermitilis (strain ATCC 31267 / DSM 46492 / JCM 5070 /NBRC 14893 / NCIMB 12804 / NRRL 8165 / MA-4680)	9.68e-51	PREDICTED: agmatine deiminase-like [Hydra vulgaris] >gi|828222054|ref|XP_012562169.1| PREDICTED: agmatine deiminase-like [Hydra vulgaris]	0	AGUA_STRAW	FALSE	0.73103	750	1	1.46206	0	ecEp_head,ecEp_stem_cell,enEp_tent-nem(pd),enEp_tentacle,i_neuron_ec2,i_neuron_ec5	ectoderm,endoderm	ecEp_head,ecEp_stem_cell,enEp_tent-nem,enEp_tentacle,i_neuron_ec	head,body,nerve net
t8837aep	t8837aep|EIF3C_DANRE	PF05470.12;PF01399.27	eIF-3c_N;PCI	Q6PFQ2|EIF3C_DANRE Eukaryotic translation initiation factor 3 subunit C {ECO:0000255|HAMAP-Rule:MF_03002} OS=Danio rerio (Zebrafish) (Brachydanio rerio)	0	PREDICTED: eukaryotic translation initiation factor 3 subunit C, partial [Hydra vulgaris]	0	EIF3C_DANRE	FALSE	0.728338	752	1	1.38499	0.0716857	i_female_germline1,i_nb1,i_nb2,i_neuron/gland_cell_progenitor,i_SC,i_stem_cell/progenitor	germ line,interstitial	i_female_germline,i_nb,i_neuron_progenitor,i_SC,i_stem_cell_progenitor	body
t34632aep	t34632aep								FALSE	0.728267	753	2	1.18827	0.268263	enEp-nb(pd),enEp-nem(pd),enEp_foot,enEp_head,enEp_SC1,enEp_stem_cell	endoderm	enEp-nb,enEp-nem,enEp_foot,enEp_head,enEp_SC1,enEp_stem_cell	body,head,foot
t14981aep	t14981aep|RAB1_DIPOM	PF00071.22;PF08477.13;PF00025.21	Ras;Roc;Arf	P22125|RAB1_DIPOM Ras-related protein ORAB-1 OS=Diplobatis ommata (Ocellated electric ray) (Discopyge ommata)	6.75e-125	PREDICTED: ras-related protein ORAB-1 [Hydra vulgaris]	2.28e-139	RAB1_DIPOM	FALSE	0.725154	756	2	1.16084	0.289467	ecEp_battery_cell1(mp),ecEp_battery_cell2(mp)	ectoderm	ecEp_battery_cell	head
t25323aep	t25323aep|LDB3_HUMAN	PF00595.24;PF00412.22	PDZ;LIM	O75112|LDB3_HUMAN LIM domain-binding protein 3 OS=Homo sapiens (Human)	3.38e-21	PREDICTED: PDZ and LIM domain protein 7-like isoform X3 [Hydra vulgaris]	0	LDB3_HUMAN	FALSE	0.724188	757	2	1.23979	0.208586	ecEp_battery_cell1(mp),ecEp_battery_cell2(mp),ecEp_head,ecEp_stem_cell,enEp-nem(pd),enEp_foot,enEp_head,enEp_SC1,enEp_stem_cell,enEp_tent-nem(pd),enEp_tentacle	ectoderm,endoderm	ecEp_battery_cell,ecEp_head,ecEp_stem_cell,enEp-nem,enEp_foot,enEp_head,enEp_SC1,enEp_stem_cell,enEp_tent-nem,enEp_tentacle	head,body,foot
t11661aep	t11661aep|AN32B_XENTR	PF14580.6;PF12799.7;PF13516.6	LRR_9;LRR_4;LRR_6	Q6P1U7|AN32B_XENTR Acidic leucine-rich nuclear phosphoprotein 32 family member B OS=Xenopus tropicalis (Western clawed frog) (Silurana tropicalis)	3.35e-39	PREDICTED: acidic leucine-rich nuclear phosphoprotein 32 family member B-like [Hydra vulgaris]	1.86e-74	AN32B_XENTR	FALSE	0.72368	758	1	1.44736	0	i_female_germline1,i_male_germline,i_nb1,i_nb2,i_neuron/gland_cell_progenitor,i_neuron_progenitor,i_stem_cell/progenitor	germ line,interstitial	i_female_germline,i_male_germline,i_nb,i_neuron_progenitor,i_stem_cell_progenitor	body
t19040aep	t19040aep|RANG_HUMAN	PF00638.18	Ran_BP1	P43487|RANG_HUMAN Ran-specific GTPase-activating protein OS=Homo sapiens (Human)	6.71e-38	PREDICTED: ran-specific GTPase-activating protein-like [Hydra vulgaris]	1.59e-132	RANG_HUMAN	FALSE	0.722692	759	1	1.32614	0.119245	i_female_germline1,i_female_germline2_nurse,i_male_germline,i_nb1,i_nb2,i_neuron/gland_cell_progenitor,i_stem_cell/progenitor	germ line,interstitial	i_female_germline,i_male_germline,i_nb,i_neuron_progenitor,i_stem_cell_progenitor	body
t17900aep	t17900aep|TSR1_XENLA	PF04950.12;PF08142.12	RIBIOP_C;AARP2CN	Q5XGY1|TSR1_XENLA Pre-rRNA-processing protein TSR1 homolog OS=Xenopus laevis (African clawed frog)	0	hypothetical protein BRAFLDRAFT_203247 [Branchiostoma floridae] >gi|229282567|gb|EEN53316.1| hypothetical protein BRAFLDRAFT_203247 [Branchiostoma floridae]	0	TSR1_XENLA	FALSE	0.721019	761	1	1.35708	0.084958	i_female_germline1,i_nb1,i_neuron/gland_cell_progenitor,i_stem_cell/progenitor	germ line,interstitial	i_female_germline,i_nb,i_neuron_progenitor,i_stem_cell_progenitor	body
t13996aep	t13996aep|FBP1_STRPU	PF00008.27;PF07699.13;PF00431.20;PF00084.20;PF12661.7;PF02494.16;PF07645.15;PF13385.6;PF01390.20;PF12662.7	EGF;Ephrin_rec_like;CUB;Sushi;hEGF;HYR;EGF_CA;Laminin_G_3;SEA;cEGF	P10079|FBP1_STRPU Fibropellin-1 OS=Strongylocentrotus purpuratus (Purple sea urchin)	6.9e-146	PREDICTED: uncharacterized protein LOC100208285 [Hydra vulgaris]	0	FBP1_STRPU	FALSE	0.720845	762	1	1.41232	0.0293701	enEp-nb(pd),enEp-nem(pd),enEp_foot,enEp_head,enEp_SC1,enEp_stem_cell	endoderm	enEp-nb,enEp-nem,enEp_foot,enEp_head,enEp_SC1,enEp_stem_cell	body,head,foot
t4657aep	t4657aep|PP2A_DROME	PF00149.28	Metallophos	P23696|PP2A_DROME Serine/threonine-protein phosphatase PP2A OS=Drosophila melanogaster (Fruit fly)	0	PREDICTED: serine/threonine-protein phosphatase 2A catalytic subunit beta isoform [Hydra vulgaris] >gi|828216022|ref|XP_012560168.1| PREDICTED: serine/threonine-protein phosphatase 2A catalytic subunit beta isoform [Hydra vulgaris]	0	PP2A_DROME	FALSE	0.719357	764	2	1.03038	0.408335	ecEp_head,ecEp_stem_cell	ectoderm	ecEp_head,ecEp_stem_cell	head,body
t611aep	t611aep|ITBX_DROME	PF00362.18;PF08725.11	Integrin_beta;Integrin_b_cyt	P11584|ITBX_DROME Integrin beta-PS OS=Drosophila melanogaster (Fruit fly)	9.47e-152	PREDICTED: integrin beta-2-like [Hydra vulgaris]	0	ITBX_DROME	FALSE	0.718045	765	1	1.3583	0.0777898	ecEp_battery_cell1(mp),ecEp_battery_cell2(mp),ecEp_head,ecEp_stem_cell,enEp_foot,enEp_head,enEp_tentacle	ectoderm,endoderm	ecEp_battery_cell,ecEp_head,ecEp_stem_cell,enEp_foot,enEp_head,enEp_tentacle	head,body,foot
t15635aep	t15635aep	PF01823.19	MACPF			PREDICTED: uncharacterized protein LOC100205745 [Hydra vulgaris]	0		FALSE	0.717595	767	1	1.43519	0	i_granular_mucous_gland_cell,i_zymogen_gland_cell	interstitial	i_granular_mucous_gland_cell,i_gland_cell	head,body
t12048aep	t12048aep|PPIB_BOVIN	PF00160.21	Pro_isomerase	P80311|PPIB_BOVIN Peptidyl-prolyl cis-trans isomerase B OS=Bos taurus (Bovine)	2.72e-74	PREDICTED: peptidyl-prolyl cis-trans isomerase B-like [Hydra vulgaris]	8.2e-130	PPIB_BOVIN	FALSE	0.717505	768	1	1.43501	0	i_female_germline2_nurse,i_nb1,i_nb2,i_nb3,i_nb4,i_nb5	germ line,interstitial	i_female_germline,i_nb	body
t11848aep	t11848aep|UBQL1_HUMAN	PF00240.23;PF17830.1;PF00627.31	ubiquitin;STI1;UBA	Q9UMX0|UBQL1_HUMAN Ubiquilin-1 OS=Homo sapiens (Human)	3.13e-101	PREDICTED: ubiquilin-1-like [Hydra vulgaris]	0	UBQL1_HUMAN	FALSE	0.715659	769	2	1.18567	0.245648	i_neuron_ec4	ectoderm	i_neuron_ec	nerve net
t4166aep	t4166aep|SERP2_MOUSE			Q6TAW2|SERP2_MOUSE Stress-associated endoplasmic reticulum protein 2 OS=Mus musculus (Mouse)	2.7e-27	PREDICTED: stress-associated endoplasmic reticulum protein 2-like [Acropora digitifera]	7.87e-27	SERP2_MOUSE	FALSE	0.71458	772	2	1.16704	0.262121	ecEp_basal_disk,i_granular_mucous_gland_cell,i_nb2,i_nb3,i_nb4,i_nb5,i_spumous_mucous_gland_cell,i_zymogen_gland_cell	ectoderm,interstitial	ecEp_basal_disk,i_granular_mucous_gland_cell,i_nb,i_gland_cell	foot,head,body
t8661aep	t8661aep|SSRA_PONAB	PF03896.16	TRAP_alpha	Q5R4X4|SSRA_PONAB Translocon-associated protein subunit alpha OS=Pongo abelii (Sumatran orangutan) (Pongo pygmaeus abelii)	1.39e-44	PREDICTED: translocon-associated protein subunit alpha-like [Hydra vulgaris]	1.33e-148	SSRA_PONAB	FALSE	0.713815	774	1	1.42763	0	i_female_germline2_nurse,i_nb1,i_nb2,i_nb3,i_nb4,i_nb5	germ line,interstitial	i_female_germline,i_nb	body
t22135aep	t22135aep|RSGI5_CLOTH	PF05270.13	AbfB	A3DEX6|RSGI5_CLOTH Anti-sigma-I factor RsgI5 {ECO:0000305} OS=Clostridium thermocellum (strain ATCC 27405 / DSM 1237 / NBRC 103400 /NCIMB 10682 / NRRL B-4536 / VPI 7372) (Ruminiclostridiumthermocellum)	2.27e-06	PREDICTED: uncharacterized protein LOC100202073 [Hydra vulgaris]	0	RSGI5_CLOTH	FALSE	0.713041	775	1	1.32421	0.101873	ecEp_basal_disk	ectoderm	ecEp_basal_disk	foot
t179aep	t179aep|NAGAB_CHICK	PF16499.5;PF17801.1;PF17450.2	Melibiase_2;Melibiase_C;Melibiase_2_C	Q90744|NAGAB_CHICK Alpha-N-acetylgalactosaminidase OS=Gallus gallus (Chicken)	4.3e-131	PREDICTED: LOW QUALITY PROTEIN: alpha-N-acetylgalactosaminidase-like [Hydra vulgaris]	0	NAGAB_CHICK	FALSE	0.712441	776	1	1.34915	0.0757317	ecEp_battery_cell1(mp),ecEp_battery_cell2(mp),ecEp_head,ecEp_stem_cell,enEp_tent-nem(pd)	ectoderm,endoderm	ecEp_battery_cell,ecEp_head,ecEp_stem_cell,enEp_tent-nem	head,body
t11045aep	t11045aep|NSA2_BOVIN	PF01201.22	Ribosomal_S8e	Q3SX11|NSA2_BOVIN Ribosome biogenesis protein NSA2 homolog OS=Bos taurus (Bovine)	2.4e-132	PREDICTED: ribosome biogenesis protein NSA2 homolog [Hydra vulgaris]	1.42e-151	NSA2_BOVIN	FALSE	0.705775	777	2	1.09965	0.3119	i_nb1,i_nb2,i_neuron/gland_cell_progenitor,i_SC,i_stem_cell/progenitor	interstitial	i_nb,i_neuron_progenitor,i_SC,i_stem_cell_progenitor	body
t12644aep	t12644aep|CAPZB_RAT	PF01115.17	F_actin_cap_B	Q5XI32|CAPZB_RAT F-actin-capping protein subunit beta OS=Rattus norvegicus (Rat)	4.82e-161	PREDICTED: F-actin-capping protein subunit beta-like [Hydra vulgaris]	0	CAPZB_RAT	FALSE	0.70536	778	2	1.15199	0.258731	ecEp_battery_cell1(mp),ecEp_battery_cell2(mp),ecEp_head	ectoderm	ecEp_battery_cell,ecEp_head	head
t2606aep	t2606aep|RAB10_PONAB	PF00071.22;PF08477.13;PF00025.21	Ras;Roc;Arf	Q5R5U1|RAB10_PONAB Ras-related protein Rab-10 OS=Pongo abelii (Sumatran orangutan) (Pongo pygmaeus abelii)	2.99e-99	PREDICTED: ras-related protein Rab-10-like [Hydra vulgaris]	4.79e-144	RAB10_PONAB	FALSE	0.704861	779	2	0.951649	0.458073	ecEp_basal_disk,ecEp_battery_cell1(mp),ecEp_battery_cell2(mp),ecEp_head,ecEp_stem_cell	ectoderm	ecEp_basal_disk,ecEp_battery_cell,ecEp_head,ecEp_stem_cell	foot,head,body
t15703aep	t15703aep|T53I1_RAT	PF14839.6	DOR	Q80YE2|T53I1_RAT Tumor protein p53-inducible nuclear protein 1 OS=Rattus norvegicus (Rat)	5.78e-09	PREDICTED: tumor protein p53-inducible nuclear protein 2-like [Hydra vulgaris]	1.56e-124	T53I1_RAT	FALSE	0.701089	780	2	1.02034	0.381838	ecEp_basal_disk,ecEp_battery_cell1(mp),ecEp_battery_cell2(mp),enEp_tent-nem(pd),enEp_tentacle,i_male_germline,i_nb4,i_nematocyte,i_neuron_ec1,i_neuron_ec2,i_neuron_ec3,i_neuron_ec4,i_neuron_ec5,i_neuron_en1,i_neuron_en2	ectoderm,endoderm,germ line,interstitial	ecEp_basal_disk,ecEp_battery_cell,enEp_tent-nem,enEp_tentacle,i_male_germline,i_nb,i_nematocyte,i_neuron_ec,i_neuron_en	foot,head,body,nerve net
t17889aep	t17889aep|CO4A2_ASCSU	PF01391.18;PF01413.19	Collagen;C4	P27393|CO4A2_ASCSU Collagen alpha-2(IV) chain OS=Ascaris suum (Pig roundworm) (Ascaris lumbricoides)	4.82e-93	collagen alpha-1(IV) chain-like precursor [Hydra vulgaris] >gi|11875612|gb|AAG40729.1| type IV collagen alpha 1 chain precursor [Hydra vulgaris]	0	CO4A2_ASCSU	FALSE	0.700166	781	1	1.30462	0.0957122	enEp-nb(pd),enEp-nem(pd),enEp_foot,enEp_head,enEp_SC1,enEp_stem_cell,enEp_tent-nem(pd),enEp_tentacle	endoderm	enEp-nb,enEp-nem,enEp_foot,enEp_head,enEp_SC1,enEp_stem_cell,enEp_tent-nem,enEp_tentacle	body,head,foot
t19411aep	t19411aep|HDC_HUMAN	PF16002.5	Headcase	Q9UBI9|HDC_HUMAN Headcase protein homolog OS=Homo sapiens (Human)	3.96e-33	PREDICTED: headcase protein homolog isoform X1 [Hydra vulgaris]	0	HDC_HUMAN	FALSE	0.700158	782	1	1.34016	0.0601563	ecEp_basal_disk,ecEp_battery_cell1(mp),ecEp_battery_cell2(mp),ecEp_head,ecEp_stem_cell	ectoderm	ecEp_basal_disk,ecEp_battery_cell,ecEp_head,ecEp_stem_cell	foot,head,body
t589aep	t589aep|ATOX1_ARATH	PF00403.26	HMA	Q94BT9|ATOX1_ARATH Copper transport protein ATX1 OS=Arabidopsis thaliana (Mouse-ear cress)	1.37e-14	PREDICTED: copper transport protein ATOX1 homolog [Hydra vulgaris]	6.56e-38	ATOX1_ARATH	FALSE	0.699524	784	2	0.73414	0.664908	enEp_foot,enEp_head,enEp_SC1,enEp_stem_cell	endoderm	enEp_foot,enEp_head,enEp_SC1,enEp_stem_cell	foot,head,body
t23052aep	t23052aep|IDD_MOUSE			P98154|IDD_MOUSE Integral membrane protein DGCR2/IDD OS=Mus musculus (Mouse)	9.44e-08	PREDICTED: integral membrane protein DGCR2/IDD-like isoform X1 [Hydra vulgaris]	6.35e-157	IDD_MOUSE	FALSE	0.693091	786	2	0.590048	0.796135	ecEp_basal_disk,ecEp_battery_cell1(mp),ecEp_battery_cell2(mp),enEp_tent-nem(pd),enEp_tentacle,i_female_germline2_nurse,i_male_germline,i_neuron_ec5	ectoderm,endoderm,germ line	ecEp_basal_disk,ecEp_battery_cell,enEp_tent-nem,enEp_tentacle,i_female_germline,i_male_germline,i_neuron_ec	foot,head,body,nerve net
t5781aep	t5781aep|SCRY4_ENTDO	PF14497.6;PF02798.20	GST_C_3;GST_N	P27012|SCRY4_ENTDO S-crystallin 4 OS=Enteroctopus dofleini (Giant octopus) (Octopus dofleini)	4.06e-28	PREDICTED: glutathione S-transferase-like [Hydra vulgaris]	5.19e-135	SCRY4_ENTDO	FALSE	0.692689	787	1	1.22055	0.164829	enEp-nb(pd),enEp-nem(pd),enEp_foot,enEp_head,enEp_SC1,enEp_stem_cell	endoderm	enEp-nb,enEp-nem,enEp_foot,enEp_head,enEp_SC1,enEp_stem_cell	body,head,foot
t29597aep	t29597aep|EIF3E_NEMVE	PF09440.10;PF01399.27	eIF3_N;PCI	A7RWP6|EIF3E_NEMVE Eukaryotic translation initiation factor 3 subunit E {ECO:0000255|HAMAP-Rule:MF_03004} OS=Nematostella vectensis (Starlet sea anemone)	0	PREDICTED: eukaryotic translation initiation factor 3 subunit E-like [Hydra vulgaris]	0	EIF3E_NEMVE	FALSE	0.691481	788	1	1.23207	0.150892	i_nb1,i_nb2,i_neuron/gland_cell_progenitor,i_stem_cell/progenitor	interstitial	i_nb,i_neuron_progenitor,i_stem_cell_progenitor	body
t2586aep	t2586aep|SEC63_HUMAN	PF02889.16;PF00226.31	Sec63;DnaJ	Q9UGP8|SEC63_HUMAN Translocation protein SEC63 homolog OS=Homo sapiens (Human)	3.37e-162	PREDICTED: translocation protein SEC63 homolog [Hydra vulgaris]	0	SEC63_HUMAN	FALSE	0.68716	790	1	1.24966	0.124661	ecEp_battery_cell1(mp),ecEp_battery_cell2(mp),i_nb2	ectoderm,interstitial	ecEp_battery_cell,i_nb	head,body
t11189aep	t11189aep|YRBE_BACSU	PF01408.22;PF02894.17	GFO_IDH_MocA;GFO_IDH_MocA_C	O05389|YRBE_BACSU Uncharacterized oxidoreductase YrbE OS=Bacillus subtilis (strain 168)	1.07e-59	PREDICTED: uncharacterized protein YMR315W-like [Hydra vulgaris]	0	YRBE_BACSU	FALSE	0.68653	792	1	1.37306	0	i_female_germline1,i_female_germline2_nurse,i_nb1,i_nb2,i_neuron/gland_cell_progenitor,i_stem_cell/progenitor	germ line,interstitial	i_female_germline,i_nb,i_neuron_progenitor,i_stem_cell_progenitor	body
t3442aep	t3442aep|PH4H_DROME	PF00351.21	Biopterin_H	P17276|PH4H_DROME Protein henna OS=Drosophila melanogaster (Fruit fly)	0	PREDICTED: uncharacterized protein LOC100197101 [Hydra vulgaris]	0	PH4H_DROME	FALSE	0.68099	799	1	1.29727	0.0647092	ecEp_battery_cell1(mp),ecEp_battery_cell2(mp),ecEp_head,i_female_germline2_nurse	ectoderm,germ line	ecEp_battery_cell,ecEp_head,i_female_germline	head,body
t15977aep	t15977aep|HNRPQ_HUMAN	PF00076.22;PF18360.1;PF13893.6	RRM_1;hnRNP_Q_AcD;RRM_5	O60506|HNRPQ_HUMAN Heterogeneous nuclear ribonucleoprotein Q OS=Homo sapiens (Human)	1.84e-155	PREDICTED: heterogeneous nuclear ribonucleoprotein Q-like [Hydra vulgaris]	0	HNRPQ_HUMAN	FALSE	0.68079	800	1	1.2276	0.13398	i_female_germline1,i_female_germline2_nurse,i_nb1,i_neuron/gland_cell_progenitor,i_neuron_progenitor,i_stem_cell/progenitor	germ line,interstitial	i_female_germline,i_nb,i_neuron_progenitor,i_stem_cell_progenitor	body
t3537aep	t3537aep|ALDR_HUMAN	PF00248.21	Aldo_ket_red	P15121|ALDR_HUMAN Aldose reductase OS=Homo sapiens (Human)	3.89e-59	PREDICTED: alcohol dehydrogenase [NADP(+)]-like [Hydra vulgaris]	0	ALDR_HUMAN	FALSE	0.678225	802	1	1.35645	0	enEp-nb(pd),enEp-nem(pd),enEp_foot,enEp_head,enEp_SC1,enEp_stem_cell,i_nb1,i_nb2,i_SC,i_stem_cell/progenitor	endoderm,interstitial	enEp-nb,enEp-nem,enEp_foot,enEp_head,enEp_SC1,enEp_stem_cell,i_nb,i_SC,i_stem_cell_progenitor	body,head,foot
t38568aep	t38568aep					PREDICTED: midasin [Hydra vulgaris]	0		FALSE	0.67744	803	1	1.35488	0	enEp-nb(pd),i_nb4,i_nb5,i_nematocyte	endoderm,interstitial	enEp-nb,i_nb,i_nematocyte	body,head
t22787aep	t22787aep|CALX_RAT	PF00262.18	Calreticulin	P35565|CALX_RAT Calnexin OS=Rattus norvegicus (Rat)	4.98e-160	PREDICTED: calnexin-like [Hydra vulgaris]	0	CALX_RAT	FALSE	0.676947	804	1	1.24881	0.105083	i_male_germline,i_nb1,i_nb2,i_neuron/gland_cell_progenitor,i_neuron_progenitor,i_SC,i_stem_cell/progenitor	germ line,interstitial	i_male_germline,i_nb,i_neuron_progenitor,i_SC,i_stem_cell_progenitor	body
t14484aep	t14484aep					PREDICTED: uncharacterized protein LOC100205991 [Hydra vulgaris] >gi|449689628|ref|XP_004212093.1| PREDICTED: uncharacterized protein LOC100205991 [Hydra vulgaris]	3.71e-141		FALSE	0.675023	806	2	0.574466	0.775581	enEp-nem(pd),enEp_foot,enEp_SC1,enEp_stem_cell	endoderm	enEp-nem,enEp_foot,enEp_SC1,enEp_stem_cell	head,foot,body
t14233aep	t14233aep|DAD1_ARAVE	PF02109.16	DAD	Q8I7Z2|DAD1_ARAVE Dolichyl-diphosphooligosaccharide--protein glycosyltransferase subunit DAD1 {ECO:0000250|UniProtKB:Q9VLM5} OS=Araneus ventricosus (Orbweaver spider) (Epeira ventricosa)	3.41e-50	PREDICTED: dolichyl-diphosphooligosaccharide--protein glycosyltransferase subunit dad1-like [Hydra vulgaris]	1.78e-75	DAD1_ARAVE	FALSE	0.673094	808	2	1.1282	0.217988	ecEp_basal_disk,i_female_germline2_nurse,i_nb2,i_nb3,i_nb5	ectoderm,germ line,interstitial	ecEp_basal_disk,i_female_germline,i_nb	foot,body
t21482aep	t21482aep|CAPSL_MOUSE	PF00036.32;PF13405.6;PF13499.6;PF13202.6;PF13833.6	EF-hand_1;EF-hand_6;EF-hand_7;EF-hand_5;EF-hand_8	Q6P8Y1|CAPSL_MOUSE Calcyphosin-like protein OS=Mus musculus (Mouse)	1.17e-54	PREDICTED: calcyphosin-like protein [Hydra vulgaris]	2.74e-112	CAPSL_MOUSE	FALSE	0.67111	809	1	1.19552	0.1467	ecEp_basal_disk,ecEp_battery_cell1(mp),ecEp_head,ecEp_stem_cell	ectoderm	ecEp_basal_disk,ecEp_battery_cell,ecEp_head,ecEp_stem_cell	foot,head,body
t13144aep	t13144aep|I4E3B_XENLA	PF01652.18	IF4E	Q6NU27|I4E3B_XENLA Eukaryotic translation initiation factor 4E type 3-B OS=Xenopus laevis (African clawed frog)	1.1e-67	PREDICTED: eukaryotic translation initiation factor 4E type 3-like [Hydra vulgaris]	1.23e-167	I4E3B_XENLA	FALSE	0.670014	810	1	1.15663	0.183397	enEp_tent-nem(pd),enEp_tentacle	endoderm	enEp_tent-nem,enEp_tentacle	head
t9182aep	t9182aep|EFHD2_DROME	PF00036.32;PF13405.6;PF13499.6;PF13202.6;PF13833.6	EF-hand_1;EF-hand_6;EF-hand_7;EF-hand_5;EF-hand_8	Q9VJ26|EFHD2_DROME EF-hand domain-containing protein D2 homolog OS=Drosophila melanogaster (Fruit fly)	1.28e-52	PREDICTED: EF-hand domain-containing protein D2 homolog [Hydra vulgaris]	9.86e-108	EFHD2_DROME	FALSE	0.669327	812	2	1.13469	0.203964	ecEp_battery_cell1(mp),ecEp_battery_cell2(mp),ecEp_head,enEp-nem(pd),enEp_foot,enEp_tent-nem(pd),enEp_tentacle,i_nematocyte	ectoderm,endoderm,interstitial	ecEp_battery_cell,ecEp_head,enEp-nem,enEp_foot,enEp_tent-nem,enEp_tentacle,i_nematocyte	head,foot
t16833aep	t16833aep					PREDICTED: probable inactive serine/threonine-protein kinase DDB_G0274613 [Hydra vulgaris]	1.15e-71		FALSE	0.667572	816	2	0.476292	0.858852	i_spumous_mucous_gland_cell	interstitial	i_gland_cell	head
t7380aep	t7380aep|PR40B_MOUSE	PF01846.19;PF00397.26	FF;WW	Q80W14|PR40B_MOUSE Pre-mRNA-processing factor 40 homolog B OS=Mus musculus (Mouse)	2.08e-106	PREDICTED: pre-mRNA-processing factor 40 homolog B-like [Hydra vulgaris]	0	PR40B_MOUSE	FALSE	0.667436	817	1	1.25792	0.076952	i_female_germline1,i_male_germline,i_nb1,i_nb2,i_neuron/gland_cell_progenitor,i_neuron_progenitor,i_stem_cell/progenitor	germ line,interstitial	i_female_germline,i_male_germline,i_nb,i_neuron_progenitor,i_stem_cell_progenitor	body
t1380aep	t1380aep					PREDICTED: asparagine-rich protein-like [Hydra vulgaris]	0		FALSE	0.666645	818	1	1.33329	0	ecEp_battery_cell1(mp),ecEp_battery_cell2(mp),ecEp_head,ecEp_stem_cell	ectoderm	ecEp_battery_cell,ecEp_head,ecEp_stem_cell	head,body
t32146aep	t32146aep					PREDICTED: fibropellin-1-like, partial [Hydra vulgaris]	3.3e-102		FALSE	0.66613	819	1	1.33226	0	ecEp_basal_disk,ecEp_battery_cell1(mp),ecEp_battery_cell2(mp),ecEp_stem_cell,enEp_tent-nem(pd),enEp_tentacle	ectoderm,endoderm	ecEp_basal_disk,ecEp_battery_cell,ecEp_stem_cell,enEp_tent-nem,enEp_tentacle	foot,head,body
t29014aep	t29014aep					PREDICTED: acidic proline-rich protein PRP25-like isoform X1 [Hydra vulgaris] >gi|828190848|ref|XP_012554858.1| PREDICTED: acidic proline-rich protein PRP25-like isoform X2 [Hydra vulgaris]	2.62e-35		FALSE	0.666082	820	1	1.19751	0.134654	ecEp_battery_cell1(mp),ecEp_battery_cell2(mp),ecEp_head	ectoderm	ecEp_battery_cell,ecEp_head	head
t16866aep	t16866aep|DRGX_MOUSE	PF00046.29	Homeodomain	Q8BYH0|DRGX_MOUSE Dorsal root ganglia homeobox protein OS=Mus musculus (Mouse)	3.02e-09	PREDICTED: short stature homeobox protein 2-like [Hydra vulgaris]	9.6e-124	DRGX_MOUSE	FALSE	0.665794	821	2	0.795138	0.536449	enEp_tent-nem(pd),enEp_tentacle	endoderm	enEp_tent-nem,enEp_tentacle	head
t4533aep	t4533aep|TES_PAPAN	PF00412.22;PF06297.14	LIM;PET	A0M8R4|TES_PAPAN Testin OS=Papio anubis (Olive baboon)	5.97e-105	PREDICTED: testin-like [Hydra vulgaris]	0	TES_PAPAN	FALSE	0.664972	823	2	1.00981	0.320134	ecEp_basal_disk,ecEp_battery_cell1(mp),ecEp_battery_cell2(mp),enEp_foot,enEp_SC1,enEp_stem_cell,enEp_tentacle,i_female_germline2_nurse	ectoderm,endoderm,germ line	ecEp_basal_disk,ecEp_battery_cell,enEp_foot,enEp_SC1,enEp_stem_cell,enEp_tentacle,i_female_germline	foot,head,body
t28764aep	t28764aep|MUTA_MOUSE	PF01642.22;PF02310.19	MM_CoA_mutase;B12-binding	P16332|MUTA_MOUSE Methylmalonyl-CoA mutase, mitochondrial OS=Mus musculus (Mouse)	0	PREDICTED: methylmalonyl-CoA mutase, mitochondrial-like [Hydra vulgaris]	0	MUTA_MOUSE	FALSE	0.663315	824	1	1.19283	0.133801	ecEp_head,enEp_SC1	ectoderm,endoderm	ecEp_head,enEp_SC1	head,body
t12722aep	t12722aep|ALDH2_HUMAN	PF00171.22	Aldedh	P05091|ALDH2_HUMAN Aldehyde dehydrogenase, mitochondrial OS=Homo sapiens (Human)	0	PREDICTED: aldehyde dehydrogenase, mitochondrial [Hydra vulgaris]	0	ALDH2_HUMAN	FALSE	0.66028	827	2	1.03126	0.289299	ecEp_battery_cell1(mp),ecEp_battery_cell2(mp),ecEp_head,ecEp_stem_cell	ectoderm	ecEp_battery_cell,ecEp_head,ecEp_stem_cell	head,body
t23810aep	t23810aep|NUCB2_RAT	PF13499.6;PF00036.32;PF13405.6	EF-hand_7;EF-hand_1;EF-hand_6	Q9JI85|NUCB2_RAT Nucleobindin-2 OS=Rattus norvegicus (Rat)	5.16e-67	PREDICTED: nucleobindin-2-like isoform X1 [Hydra vulgaris]	0	NUCB2_RAT	FALSE	0.657806	828	1	1.17208	0.143531	ecEp_basal_disk,enEp_tent-nem(pd),enEp_tentacle,i_granular_mucous_gland_cell,i_spumous_mucous_gland_cell,i_zymogen_gland_cell	ectoderm,endoderm,interstitial	ecEp_basal_disk,enEp_tent-nem,enEp_tentacle,i_granular_mucous_gland_cell,i_gland_cell	foot,head,body
t4097aep	t4097aep					PREDICTED: uncharacterized protein LOC101239382 [Hydra vulgaris]	4.61e-103		FALSE	0.657563	829	1	1.14351	0.171615	ecEp_basal_disk,ecEp_battery_cell1(mp),ecEp_battery_cell2(mp),ecEp_head,ecEp_stem_cell,enEp_tent-nem(pd),enEp_tentacle	ectoderm,endoderm	ecEp_basal_disk,ecEp_battery_cell,ecEp_head,ecEp_stem_cell,enEp_tent-nem,enEp_tentacle	foot,head,body
t3415aep	t3415aep|STX7_RAT	PF14523.6	Syntaxin_2	O70257|STX7_RAT Syntaxin-7 OS=Rattus norvegicus (Rat)	2.45e-44	PREDICTED: syntaxin-7-like [Hydra vulgaris]	2.71e-149	STX7_RAT	FALSE	0.657052	830	2	1.05525	0.258854	ecEp_basal_disk,ecEp_battery_cell1(mp),ecEp_battery_cell2(mp),enEp_foot,enEp_stem_cell,enEp_tent-nem(pd),enEp_tentacle,i_neuron_en1	ectoderm,endoderm	ecEp_basal_disk,ecEp_battery_cell,enEp_foot,enEp_stem_cell,enEp_tent-nem,enEp_tentacle,i_neuron_en	foot,head,body,nerve net
t5724aep	t5724aep|CYT_CYACP	PF00031.21	Cystatin	Q331K1|CYT_CYACP Cystatin J OS=Cyanea capillata (Lion's mane jellyfish) (Cyanea arctica)	1.09e-06	PREDICTED: cystatin-like [Hydra vulgaris]	4.33e-39	CYT_CYACP	FALSE	0.656295	831	1	1.31259	0	enEp-nb(pd),enEp-nem(pd),enEp_foot,enEp_head,enEp_SC1,enEp_stem_cell,enEp_tent-nem(pd),enEp_tentacle	endoderm	enEp-nb,enEp-nem,enEp_foot,enEp_head,enEp_SC1,enEp_stem_cell,enEp_tent-nem,enEp_tentacle	body,head,foot
t28798aep	t28798aep|CH60_CHICK	PF00118.24	Cpn60_TCP1	Q5ZL72|CH60_CHICK 60 kDa heat shock protein, mitochondrial OS=Gallus gallus (Chicken)	0	PREDICTED: 60 kDa heat shock protein, mitochondrial-like [Hydra vulgaris]	0	CH60_CHICK	FALSE	0.65223	834	1	1.1541	0.150359	i_female_germline1,i_female_germline2_nurse,i_nb1,i_nb2,i_neuron/gland_cell_progenitor,i_stem_cell/progenitor	germ line,interstitial	i_female_germline,i_nb,i_neuron_progenitor,i_stem_cell_progenitor	body
t16915aep	t16915aep|PERQ2_XENLA	PF02213.16	GYF	Q5U236|PERQ2_XENLA PERQ amino acid-rich with GYF domain-containing protein 2 OS=Xenopus laevis (African clawed frog)	1.29e-21	PREDICTED: PERQ amino acid-rich with GYF domain-containing protein 2-like [Hydra vulgaris]	0	PERQ2_XENLA	FALSE	0.650528	839	1	1.1421	0.158956	i_nb1,i_SC,i_stem_cell/progenitor	interstitial	i_nb,i_SC,i_stem_cell_progenitor	body
t12854aep	t12854aep					PREDICTED: mucin-3A-like, partial [Hydra vulgaris]	4.43e-07		FALSE	0.650339	841	1	1.19973	0.100947	ecEp_battery_cell1(mp),ecEp_battery_cell2(mp),ecEp_head,ecEp_stem_cell	ectoderm	ecEp_battery_cell,ecEp_head,ecEp_stem_cell	head,body
t14444aep	t14444aep|TCPQ_CHICK	PF00118.24	Cpn60_TCP1	Q6EE31|TCPQ_CHICK T-complex protein 1 subunit theta OS=Gallus gallus (Chicken)	0	PREDICTED: T-complex protein 1 subunit theta-like [Hydra vulgaris]	0	TCPQ_CHICK	FALSE	0.650055	842	1	1.30011	0	i_female_germline1,i_female_germline2_nurse,i_nb1,i_neuron/gland_cell_progenitor,i_neuron_progenitor,i_stem_cell/progenitor	germ line,interstitial	i_female_germline,i_nb,i_neuron_progenitor,i_stem_cell_progenitor	body
t12818aep	t12818aep|ELAV3_XENLA	PF00076.22;PF13893.6	RRM_1;RRM_5	Q91584|ELAV3_XENLA ELAV-like protein 3 OS=Xenopus laevis (African clawed frog)	6.3e-55	PREDICTED: ELAV-like protein 3 [Hydra vulgaris]	0	ELAV3_XENLA	FALSE	0.644551	845	1	1.14252	0.146581	i_female_germline1	germ line	i_female_germline	body
t612aep	t612aep|GNAQ_MIZYE	PF00503.20;PF00025.21	G-alpha;Arf	O15975|GNAQ_MIZYE Guanine nucleotide-binding protein G(q) subunit alpha OS=Mizuhopecten yessoensis (Japanese scallop) (Patinopecten yessoensis)	0	PREDICTED: guanine nucleotide-binding protein G(q) subunit alpha [Hydra vulgaris]	0	GNAQ_MIZYE	FALSE	0.644234	846	1	1.10773	0.180738	ecEp_battery_cell1(mp),ecEp_battery_cell2(mp),i_neuron_ec3	ectoderm	ecEp_battery_cell,i_neuron_ec	head,nerve net
t5476aep	t5476aep								FALSE	0.643521	847	1	1.10107	0.185973	i_neuron_progenitor	interstitial	i_neuron_progenitor	body
t14010aep	t14010aep|SYNC_BOVIN	PF00152.20;PF01336.25	tRNA-synt_2;tRNA_anti-codon	Q2KJG3|SYNC_BOVIN Asparagine--tRNA ligase, cytoplasmic OS=Bos taurus (Bovine)	0	PREDICTED: LOW QUALITY PROTEIN: asparagine--tRNA ligase, cytoplasmic-like [Hydra vulgaris]	0	SYNC_BOVIN	FALSE	0.641686	849	1	1.11079	0.172581	ecEp_basal_disk,ecEp_battery_cell1(mp),i_female_germline1,i_male_germline,i_nb3	ectoderm,germ line,interstitial	ecEp_basal_disk,ecEp_battery_cell,i_female_germline,i_male_germline,i_nb	foot,head,body
t1674aep	t1674aep|SYK_MOUSE	PF00152.20;PF01336.25;PF01409.20	tRNA-synt_2;tRNA_anti-codon;tRNA-synt_2d	Q99MN1|SYK_MOUSE Lysine--tRNA ligase OS=Mus musculus (Mouse)	0	PREDICTED: lysine--tRNA ligase isoform X1 [Stegastes partitus]	0	SYK_MOUSE	FALSE	0.639428	850	1	1.13145	0.147405	enEp_tent-nem(pd),i_female_germline1,i_male_germline,i_nb1,i_nb2,i_nb3	endoderm,germ line,interstitial	enEp_tent-nem,i_female_germline,i_male_germline,i_nb	head,body
t27994aep	t27994aep|CHIA_RAT	PF00704.28	Glyco_hydro_18	Q6RY07|CHIA_RAT Acidic mammalian chitinase OS=Rattus norvegicus (Rat)	5.06e-38	PREDICTED: chitinase-3-like protein 1 [Hydra vulgaris]	2.17e-85	CHIA_RAT	FALSE	0.63911	851	1	1.27822	0	i_zymogen_gland_cell	interstitial	i_gland_cell	body
t5289aep	t5289aep|EIF3I_NEMVE	PF00400.32;PF12894.7	WD40;ANAPC4_WD40	A7RM20|EIF3I_NEMVE Eukaryotic translation initiation factor 3 subunit I {ECO:0000255|HAMAP-Rule:MF_03008} OS=Nematostella vectensis (Starlet sea anemone)	5.3e-155	PREDICTED: eukaryotic translation initiation factor 3 subunit I-like [Hydra vulgaris]	0	EIF3I_NEMVE	FALSE	0.636973	852	1	1.20044	0.0735058	i_female_germline1,i_nb1,i_nb2,i_SC,i_stem_cell/progenitor	germ line,interstitial	i_female_germline,i_nb,i_SC,i_stem_cell_progenitor	body
t11601aep	t11601aep|RS40_ARATH	PF00076.22	RRM_1	P92965|RS40_ARATH Serine/arginine-rich splicing factor RS40 OS=Arabidopsis thaliana (Mouse-ear cress)	3.93e-12	PREDICTED: probable splicing factor, arginine/serine-rich 5 [Hydra vulgaris]	4.27e-159	RS40_ARATH	FALSE	0.635476	855	1	1.12006	0.150892	i_female_germline1,i_nb1,i_neuron/gland_cell_progenitor,i_stem_cell/progenitor	germ line,interstitial	i_female_germline,i_nb,i_neuron_progenitor,i_stem_cell_progenitor	body
t12938aep	t12938aep|SRSF6_HUMAN	PF00076.22;PF13893.6	RRM_1;RRM_5	Q13247|SRSF6_HUMAN Serine/arginine-rich splicing factor 6 OS=Homo sapiens (Human)	2.35e-38	PREDICTED: serine/arginine-rich splicing factor 5-like [Hydra vulgaris]	4.54e-95	SRSF6_HUMAN	FALSE	0.63498	856	1	1.26996	0	i_female_germline1,i_female_germline2_nurse,i_nb1,i_nb2,i_neuron/gland_cell_progenitor,i_neuron_ec2,i_neuron_progenitor,i_stem_cell/progenitor	germ line,interstitial,ectoderm	i_female_germline,i_nb,i_neuron_progenitor,i_neuron_ec,i_stem_cell_progenitor	body,nerve net
t11850aep	t11850aep								FALSE	0.634675	857	1	1.26935	0	enEp-nb(pd),enEp-nem(pd),enEp_foot,enEp_head,enEp_SC1,enEp_stem_cell,enEp_tent-nem(pd),enEp_tentacle	endoderm	enEp-nb,enEp-nem,enEp_foot,enEp_head,enEp_SC1,enEp_stem_cell,enEp_tent-nem,enEp_tentacle	body,head,foot
t29408aep	t29408aep					PREDICTED: protein DD3-3-like [Hydra vulgaris]	9.63e-40		FALSE	0.63422	858	1	1.26844	0	ecEp_battery_cell1(mp),ecEp_battery_cell2(mp)	ectoderm	ecEp_battery_cell	head
t3105aep	t3105aep|SQSTM_RAT	PF00569.17;PF00564.24;PF16577.5	ZZ;PB1;UBA_5	O08623|SQSTM_RAT Sequestosome-1 OS=Rattus norvegicus (Rat)	1.43e-15	PREDICTED: sequestosome-1-like [Hydra vulgaris]	0	SQSTM_RAT	FALSE	0.633618	859	1	1.13438	0.132856	ecEp_basal_disk,ecEp_battery_cell1(mp),ecEp_battery_cell2(mp),ecEp_stem_cell,enEp_SC1,enEp_tent-nem(pd),i_nematocyte,i_neuron_ec1	ectoderm,endoderm,interstitial	ecEp_basal_disk,ecEp_battery_cell,ecEp_stem_cell,enEp_SC1,enEp_tent-nem,i_nematocyte,i_neuron_ec	foot,head,body,nerve net
t22793aep	t22793aep|TOM22_BOVIN	PF04281.13	Tom22	A6QPI6|TOM22_BOVIN Mitochondrial import receptor subunit TOM22 homolog OS=Bos taurus (Bovine)	3.13e-16	PREDICTED: mitochondrial import receptor subunit TOM22 homolog [Hydra vulgaris]	1.77e-77	TOM22_BOVIN	FALSE	0.633614	860	2	0.699817	0.567412	i_female_germline1,i_neuron/gland_cell_progenitor,i_SC,i_stem_cell/progenitor	germ line,interstitial	i_female_germline,i_neuron_progenitor,i_SC,i_stem_cell_progenitor	body
t6483aep	t6483aep|TI17B_MOUSE	PF02466.19	Tim17	Q9Z0V7|TI17B_MOUSE Mitochondrial import inner membrane translocase subunit Tim17-B OS=Mus musculus (Mouse)	1.84e-57	PREDICTED: mitochondrial import inner membrane translocase subunit Tim17-A-like [Hydra vulgaris]	3.5e-95	TI17B_MOUSE	FALSE	0.63253	861	1	1.26506	0	enEp_stem_cell	endoderm	enEp_stem_cell	body
t16989aep	t16989aep|AEN_RAT	PF00929.24	RNase_T	B2GUW6|AEN_RAT Apoptosis-enhancing nuclease {ECO:0000250|UniProtKB:Q8WTP8} OS=Rattus norvegicus (Rat)	1.87e-46	PREDICTED: interferon-stimulated gene 20 kDa protein-like [Hydra vulgaris]	3.02e-140	AEN_RAT	FALSE	0.631676	862	2	0.969771	0.293582	i_nb1,i_nb2,i_neuron/gland_cell_progenitor,i_neuron_progenitor,i_SC,i_stem_cell/progenitor	interstitial	i_nb,i_neuron_progenitor,i_SC,i_stem_cell_progenitor	body
t8283aep	t8283aep|ARPC5_MOUSE	PF04699.14	P16-Arc	Q9CPW4|ARPC5_MOUSE Actin-related protein 2/3 complex subunit 5 OS=Mus musculus (Mouse)	1.17e-29	PREDICTED: actin-related protein 2/3 complex subunit 5-like [Hydra vulgaris]	3.22e-83	ARPC5_MOUSE	FALSE	0.631351	863	1	1.13509	0.127611	ecEp_battery_cell1(mp),ecEp_battery_cell2(mp),ecEp_head,ecEp_stem_cell,enEp_foot	ectoderm,endoderm	ecEp_battery_cell,ecEp_head,ecEp_stem_cell,enEp_foot	head,body,foot
t3254aep	t3254aep					PREDICTED: uncharacterized protein LOC101239600 [Hydra vulgaris]	4.99e-100		FALSE	0.630277	864	2	0.942429	0.318125	i_neuron_progenitor	interstitial	i_neuron_progenitor	body
t10564aep	t10564aep|DD3_DICDI			Q58A42|DD3_DICDI Protein DD3-3 OS=Dictyostelium discoideum (Slime mold)	9.66e-89	PREDICTED: protein DD3-3-like [Hydra vulgaris]	0	DD3_DICDI	FALSE	0.629333	865	1	1.21205	0.0466163	ecEp_battery_cell1(mp),ecEp_battery_cell2(mp),ecEp_head	ectoderm	ecEp_battery_cell,ecEp_head	head
t20546aep	t20546aep|GSCR2_HUMAN	PF07767.11	Nop53	Q9NZM5|GSCR2_HUMAN Glioma tumor suppressor candidate region gene 2 protein OS=Homo sapiens (Human)	1.47e-15	PREDICTED: uncharacterized protein Y39B6A.33-like isoform X1 [Hydra vulgaris]	0	GSCR2_HUMAN	FALSE	0.629129	866	1	1.18566	0.0725989	i_nb1,i_neuron/gland_cell_progenitor,i_neuron_progenitor,i_SC,i_stem_cell/progenitor	interstitial	i_nb,i_neuron_progenitor,i_SC,i_stem_cell_progenitor	body
t5118aep	t5118aep|FP_ACRMI	PF13927.6;PF07679.16;PF13895.6;PF00047.25;PF00041.21;PF07686.17	Ig_3;I-set;Ig_2;ig;fn3;V-set	B8VIW9|FP_ACRMI Fibronectin type III domain-containing protein OS=Acropora millepora (Staghorn coral)	3.31e-93	Contactin 4, partial [Hydra vulgaris]	0	FP_ACRMI	FALSE	0.628529	867	1	1.21053	0.0465284	ecEp_basal_disk,ecEp_battery_cell1(mp),ecEp_battery_cell2(mp),ecEp_head,ecEp_stem_cell	ectoderm	ecEp_basal_disk,ecEp_battery_cell,ecEp_head,ecEp_stem_cell	foot,head,body
t17518aep	t17518aep|CPO_DROME	PF00076.22	RRM_1	Q01617|CPO_DROME Protein couch potato OS=Drosophila melanogaster (Fruit fly)	2.12e-36	PREDICTED: protein couch potato-like isoform X1 [Hydra vulgaris] >gi|828217287|ref|XP_012560611.1| PREDICTED: protein couch potato-like isoform X1 [Hydra vulgaris]	0	CPO_DROME	FALSE	0.626228	868	1	1.1349	0.117556	ecEp_battery_cell1(mp),ecEp_battery_cell2(mp),ecEp_head,i_nematocyte	ectoderm,interstitial	ecEp_battery_cell,ecEp_head,i_nematocyte	head
t3809aep	t3809aep|PRFA_POLPE			P21259|PRFA_POLPE Pol-RFamide neuropeptides OS=Polyorchis penicillatus (Hydromedusa)	3.92e-11	PREDICTED: pol-RFamide neuropeptides [Hydra vulgaris] >gi|828211795|ref|XP_012558776.1| PREDICTED: pol-RFamide neuropeptides [Hydra vulgaris] >gi|3250814|emb|CAA72373.1| neuropeptide precursor [Hydra vulgaris]	3.25e-67	PRFA_POLPE	FALSE	0.625916	869	1	1.10295	0.148883	i_neuron_ec4,i_neuron_ec5	ectoderm	i_neuron_ec	nerve net
t9589aep	t9589aep|BL1S4_MOUSE			Q8VED2|BL1S4_MOUSE Biogenesis of lysosome-related organelles complex 1 subunit 4 OS=Mus musculus (Mouse)	3.17e-15	PREDICTED: biogenesis of lysosome-related organelles complex 1 subunit 4-like [Hydra vulgaris]	5.45e-122	BL1S4_MOUSE	FALSE	0.625502	871	1	1.08779	0.163215	ecEp_battery_cell1(mp),enEp_foot,enEp_SC1,i_male_germline	ectoderm,endoderm,germ line	ecEp_battery_cell,enEp_foot,enEp_SC1,i_male_germline	head,foot,body
t4123aep	t4123aep|SCOT1_HUMAN	PF01144.23	CoA_trans	P55809|SCOT1_HUMAN Succinyl-CoA:3-ketoacid coenzyme A transferase 1, mitochondrial OS=Homo sapiens (Human)	0	PREDICTED: succinyl-CoA:3-ketoacid coenzyme A transferase 1, mitochondrial-like [Hydra vulgaris]	0	SCOT1_HUMAN	FALSE	0.623425	872	2	0.92275	0.324101	enEp_tent-nem(pd),enEp_tentacle,i_neuron_ec1	endoderm,ectoderm	enEp_tent-nem,enEp_tentacle,i_neuron_ec	head,nerve net
t10556aep	t10556aep|PFD5_HUMAN	PF02996.17	Prefoldin	Q99471|PFD5_HUMAN Prefoldin subunit 5 OS=Homo sapiens (Human)	1.27e-36	PREDICTED: prefoldin subunit 5-like [Hydra vulgaris]	1.41e-95	PFD5_HUMAN	FALSE	0.622985	873	1	1.24597	0	i_nb1,i_neuron/gland_cell_progenitor,i_neuron_progenitor,i_SC,i_stem_cell/progenitor	interstitial	i_nb,i_neuron_progenitor,i_SC,i_stem_cell_progenitor	body
t6762aep	t6762aep|TOP1_HUMAN	PF01028.20;PF02919.15;PF14370.6	Topoisom_I;Topoisom_I_N;Topo_C_assoc	P11387|TOP1_HUMAN DNA topoisomerase 1 OS=Homo sapiens (Human)	0	PREDICTED: DNA topoisomerase I, mitochondrial-like [Hydra vulgaris]	0	TOP1_HUMAN	FALSE	0.622638	874	1	1.16856	0.076716	i_nb1,i_nb2,i_neuron/gland_cell_progenitor,i_neuron_progenitor,i_SC,i_stem_cell/progenitor	interstitial	i_nb,i_neuron_progenitor,i_SC,i_stem_cell_progenitor	body
t4609aep	t4609aep|NDUA6_BOVIN	PF05347.15	Complex1_LYR	Q02366|NDUA6_BOVIN NADH dehydrogenase [ubiquinone] 1 alpha subcomplex subunit 6 OS=Bos taurus (Bovine)	6.76e-41	PREDICTED: NADH dehydrogenase [ubiquinone] 1 alpha subcomplex subunit 6-like [Hydra vulgaris]	5.02e-70	NDUA6_BOVIN	FALSE	0.62149	875	1	1.24298	0	i_male_germline	germ line	i_male_germline	body
t35278aep	t35278aep|NOP10_DANRE	PF04135.12	Nop10p	Q6DRH5|NOP10_DANRE H/ACA ribonucleoprotein complex subunit 3 OS=Danio rerio (Zebrafish) (Brachydanio rerio)	6.77e-28	PREDICTED: uncharacterized protein LOC105264671 [Fopius arisanus]	2.06e-26	NOP10_DANRE	FALSE	0.621368	876	2	0.737648	0.505089	i_female_germline1,i_male_germline,i_nb1,i_neuron/gland_cell_progenitor,i_neuron_progenitor,i_stem_cell/progenitor	germ line,interstitial	i_female_germline,i_male_germline,i_nb,i_neuron_progenitor,i_stem_cell_progenitor	body
t15009aep	t15009aep|METK1_MOUSE	PF02773.16;PF02772.16;PF00438.20	S-AdoMet_synt_C;S-AdoMet_synt_M;S-AdoMet_synt_N	Q91X83|METK1_MOUSE S-adenosylmethionine synthase isoform type-1 OS=Mus musculus (Mouse)	7.85e-178	PREDICTED: S-adenosylmethionine synthase isoform type-1-like [Hydra vulgaris]	0	METK1_MOUSE	FALSE	0.621031	877	1	1.1704	0.0716627	ecEp_battery_cell1(mp),enEp-nb(pd),enEp-nem(pd),enEp_foot,enEp_head,enEp_SC1,enEp_stem_cell	ectoderm,endoderm	ecEp_battery_cell,enEp-nb,enEp-nem,enEp_foot,enEp_head,enEp_SC1,enEp_stem_cell	head,body,foot
t20526aep	t20526aep|WBP2_MOUSE			P97765|WBP2_MOUSE WW domain-binding protein 2 OS=Mus musculus (Mouse)	9.39e-21	PREDICTED: postacrosomal sheath WW domain-binding protein-like, partial [Hydra vulgaris]	1.09e-93	WBP2_MOUSE	FALSE	0.619577	880	1	1.06959	0.169564	ecEp_basal_disk,ecEp_battery_cell1(mp),ecEp_battery_cell2(mp),enEp_tent-nem(pd),i_neuron_ec4	ectoderm,endoderm	ecEp_basal_disk,ecEp_battery_cell,enEp_tent-nem,i_neuron_ec	foot,head,nerve net
t15256aep	t15256aep|ERP44_MOUSE	PF13848.6;PF00085.20	Thioredoxin_6;Thioredoxin	Q9D1Q6|ERP44_MOUSE Endoplasmic reticulum resident protein 44 OS=Mus musculus (Mouse)	6.53e-110	PREDICTED: endoplasmic reticulum resident protein 44-like [Hydra vulgaris]	0	ERP44_MOUSE	FALSE	0.61941	881	1	1.23882	0	i_granular_mucous_gland_cell,i_nb1,i_nb2,i_nb3,i_nb5	interstitial	i_granular_mucous_gland_cell,i_nb	head,body
t19384aep	t19384aep					PREDICTED: uncharacterized protein LOC100215883 [Hydra vulgaris]	1.81e-125		FALSE	0.616888	883	2	0.819213	0.414564	i_granular_mucous_gland_cell	interstitial	i_granular_mucous_gland_cell	head
t12603aep	t12603aep					PREDICTED: serine/threonine-protein kinase dst1-like [Hydra vulgaris] >gi|828223586|ref|XP_012562672.1| PREDICTED: serine/threonine-protein kinase dst1-like [Hydra vulgaris] >gi|828223588|ref|XP_012562673.1| PREDICTED: serine/threonine-protein kinase dst1-like [Hydra vulgaris]	1.01e-121		FALSE	0.615568	884	1	1.12298	0.108157	enEp_tent-nem(pd),enEp_tentacle	endoderm	enEp_tent-nem,enEp_tentacle	head
t29251aep	t29251aep					PREDICTED: uncharacterized protein LOC105845407 [Hydra vulgaris]	0		FALSE	0.615495	885	1	1.23099	0	ecEp_basal_disk	ectoderm	ecEp_basal_disk	foot
t15502aep	t15502aep|TDX_CYNPY	PF00578.21;PF08534.10;PF10417.9	AhpC-TSA;Redoxin;1-cysPrx_C	P0CB50|PRDX1_CHICK Peroxiredoxin-1 OS=Gallus gallus (Chicken)	1.04e-103	PREDICTED: peroxiredoxin-1-like [Hydra vulgaris]	8.8e-166	TDX_CYNPY	FALSE	0.61527	886	1	1.11488	0.11566	enEp-nb(pd),enEp-nem(pd),enEp_foot,enEp_head,enEp_SC1,enEp_stem_cell	endoderm	enEp-nb,enEp-nem,enEp_foot,enEp_head,enEp_SC1,enEp_stem_cell	body,head,foot
t12060aep	t12060aep|FGF1_CYNPY	PF00167.18;PF06268.13	FGF;Fascin	Q6I6M7|FGF1_CYNPY Fibroblast growth factor 1 OS=Cynops pyrrhogaster (Japanese fire-bellied newt)	1.26e-07	FGF-1 [Hydra vulgaris]	4.49e-111	FGF1_CYNPY	FALSE	0.614215	889	2	0.886373	0.342057	enEp_head,enEp_tent-nem(pd),enEp_tentacle	endoderm	enEp_head,enEp_tent-nem,enEp_tentacle	head
t5500aep	t5500aep|TPM1_PODCA	PF00261.20	Tropomyosin	P41114|TPM1_PODCA Tropomyosin-1 OS=Podocoryna carnea (Jellyfish)	8.22e-28	PREDICTED: tropomyosin-1-like [Hydra vulgaris]	4.76e-119	TPM1_PODCA	FALSE	0.61265	891	1	1.10148	0.12382	ecEp_basal_disk,ecEp_battery_cell1(mp),ecEp_battery_cell2(mp),enEp_tent-nem(pd),enEp_tentacle,i_neuron_ec1,i_neuron_ec4,i_neuron_progenitor	ectoderm,endoderm,interstitial	ecEp_basal_disk,ecEp_battery_cell,enEp_tent-nem,enEp_tentacle,i_neuron_ec,i_neuron_progenitor	foot,head,nerve net,body
t14614aep	t14614aep|ARP3_RAT	PF00022.19	Actin	Q4V7C7|ARP3_RAT Actin-related protein 3 OS=Rattus norvegicus (Rat)	0	PREDICTED: actin-related protein 3 [Hydra vulgaris]	0	ARP3_RAT	FALSE	0.6104	892	1	1.2208	0	ecEp_battery_cell1(mp),ecEp_battery_cell2(mp),ecEp_head,i_female_germline2_nurse	ectoderm,germ line	ecEp_battery_cell,ecEp_head,i_female_germline	head,body
t27460aep	t27460aep|MVP_STRPU	PF01505.18;PF11978.8;PF17795.1;PF17794.1;PF17796.1	Vault;MVP_shoulder;Vault_3;Vault_2;Vault_4	Q5EAJ7|MVP_STRPU Major vault protein {ECO:0000312|EMBL:DAA05661.1} OS=Strongylocentrotus purpuratus (Purple sea urchin)	0	PREDICTED: major vault protein-like [Hydra vulgaris]	0	MVP_STRPU	FALSE	0.607454	893	1	1.18307	0.0318386	ecEp_basal_disk,ecEp_battery_cell1(mp),ecEp_battery_cell2(mp),ecEp_head,ecEp_stem_cell	ectoderm	ecEp_basal_disk,ecEp_battery_cell,ecEp_head,ecEp_stem_cell	foot,head,body
t15889aep	t15889aep|ATIF1_PONAB	PF04568.12	IATP	Q5RFJ9|ATIF1_PONAB ATPase inhibitor, mitochondrial OS=Pongo abelii (Sumatran orangutan) (Pongo pygmaeus abelii)	1.91e-08	PREDICTED: ATPase inhibitor A, mitochondrial-like [Hydra vulgaris]	2.78e-57	ATIF1_PONAB	FALSE	0.60674	894	2	0.955626	0.257854	i_neuron/gland_cell_progenitor	interstitial	i_neuron_progenitor	body
t24787aep	t24787aep|C4S2A_XENLA			Q5FVD7|C4S2A_XENLA CDC42 small effector protein 2-A OS=Xenopus laevis (African clawed frog)	1.04e-19	PREDICTED: CDC42 small effector protein 2-A-like [Hydra vulgaris]	8.03e-48	C4S2A_XENLA	FALSE	0.605604	895	2	0.835068	0.376141	ecEp_basal_disk,ecEp_head,ecEp_stem_cell,enEp_stem_cell	ectoderm,endoderm	ecEp_basal_disk,ecEp_head,ecEp_stem_cell,enEp_stem_cell	foot,head,body
t15170aep	t15170aep|BZW2_CHICK	PF02020.18	W2	Q5ZL42|BZW2_CHICK Basic leucine zipper and W2 domain-containing protein 2 OS=Gallus gallus (Chicken)	9.35e-136	PREDICTED: basic leucine zipper and W2 domain-containing protein 1-like [Hydra vulgaris]	0	BZW2_CHICK	FALSE	0.605303	896	1	1.15861	0.0519954	i_female_germline1,i_nb1,i_SC,i_stem_cell/progenitor	germ line,interstitial	i_female_germline,i_nb,i_SC,i_stem_cell_progenitor	body
t12636aep	t12636aep|RBM12_MOUSE	PF00076.22	RRM_1	Q8R4X3|RBM12_MOUSE RNA-binding protein 12 OS=Mus musculus (Mouse)	2.12e-07	PREDICTED: uncharacterized protein LOC100200216 [Hydra vulgaris]	0	RBM12_MOUSE	FALSE	0.605075	897.5	1	1.21015	0	i_female_germline1,i_nb1,i_neuron/gland_cell_progenitor,i_stem_cell/progenitor	germ line,interstitial	i_female_germline,i_nb,i_neuron_progenitor,i_stem_cell_progenitor	body
t27872aep	t27872aep|ANM1_XENTR	PF13649.6;PF06325.13;PF08241.12;PF13847.6;PF13489.6	Methyltransf_25;PrmA;Methyltransf_11;Methyltransf_31;Methyltransf_23	Q28F07|ANM1_XENTR Protein arginine N-methyltransferase 1 {ECO:0000312|EMBL:AAH74614.1} OS=Xenopus tropicalis (Western clawed frog) (Silurana tropicalis)	6.2e-160	PREDICTED: protein arginine N-methyltransferase 1-like [Hydra vulgaris]	0	ANM1_XENTR	FALSE	0.605075	897.5	1	1.21015	0	i_female_germline1,i_nb1,i_nb2,i_neuron/gland_cell_progenitor,i_neuron_progenitor,i_stem_cell/progenitor	germ line,interstitial	i_female_germline,i_nb,i_neuron_progenitor,i_stem_cell_progenitor	body
t18073aep	t18073aep|GRP75_BOVIN	PF00012.20;PF06723.13;PF14450.6	HSP70;MreB_Mbl;FtsA	Q3ZCH0|GRP75_BOVIN Stress-70 protein, mitochondrial OS=Bos taurus (Bovine)	0	PREDICTED: stress-70 protein, mitochondrial-like [Hydra vulgaris]	0	GRP75_BOVIN	FALSE	0.604114	899	1	1.11958	0.0886471	i_female_germline1,i_female_germline2_nurse,i_nb1,i_neuron/gland_cell_progenitor,i_stem_cell/progenitor	germ line,interstitial	i_female_germline,i_nb,i_neuron_progenitor,i_stem_cell_progenitor	body
t31411aep	t31411aep	PF04505.12	CD225			PREDICTED: uncharacterized protein LOC100197985 [Hydra vulgaris]	5.22e-78		FALSE	0.603876	900	2	0.783785	0.423966	enEp-nb(pd),enEp-nem(pd),enEp_foot,enEp_head,enEp_SC1,enEp_stem_cell	endoderm	enEp-nb,enEp-nem,enEp_foot,enEp_head,enEp_SC1,enEp_stem_cell	body,head,foot
t21914aep	t21914aep|MCPI_MELCP	PF00050.21;PF07648.15	Kazal_1;Kazal_2	P82968|MCPI_MELCP Four-domain proteases inhibitor OS=Melithaea caledonica	1.12e-24	kazal-type serine protease inihibitor 2 precursor [Hydra vulgaris] >gi|219881818|gb|ACL52153.1| kazal-type serine protease inihibitor 2 [Hydra vulgaris]	3.6e-100	MCPI_MELCP	FALSE	0.602559	901	1	1.01159	0.193528	i_granular_mucous_gland_cell,i_zymogen_gland_cell	interstitial	i_granular_mucous_gland_cell,i_gland_cell	head,body
t11572aep	t11572aep|CHTOP_HUMAN			Q9Y3Y2|CHTOP_HUMAN Chromatin target of PRMT1 protein OS=Homo sapiens (Human)	4.57e-11	PREDICTED: chromatin target of PRMT1 protein-like [Hydra vulgaris]	1.46e-106	CHTOP_HUMAN	FALSE	0.601842	902	2	0.664802	0.538883	i_male_germline,i_nb1,i_neuron/gland_cell_progenitor	germ line,interstitial	i_male_germline,i_nb,i_neuron_progenitor	body
t6556aep	t6556aep|ERGI3_DANRE	PF07970.12;PF13850.6	COPIIcoated_ERV;ERGIC_N	Q803I2|ERGI3_DANRE Endoplasmic reticulum-Golgi intermediate compartment protein 3 OS=Danio rerio (Zebrafish) (Brachydanio rerio)	0	PREDICTED: endoplasmic reticulum-Golgi intermediate compartment protein 3-like isoform X1 [Hydra vulgaris]	0	ERGI3_DANRE	FALSE	0.601834	903	2	0.869078	0.33459	i_male_germline,i_nb2,i_spumous_mucous_gland_cell	germ line,interstitial	i_male_germline,i_nb,i_gland_cell	body,head
t24571aep	t24571aep|ARPC3_MOUSE	PF04062.14	P21-Arc	Q9JM76|ARPC3_MOUSE Actin-related protein 2/3 complex subunit 3 OS=Mus musculus (Mouse)	2.32e-73	PREDICTED: actin-related protein 2/3 complex subunit 3-like [Hydra vulgaris]	4.47e-124	ARPC3_MOUSE	FALSE	0.59904	904	2	0.943508	0.254573	ecEp_battery_cell1(mp),ecEp_battery_cell2(mp),ecEp_head,enEp_tentacle	ectoderm,endoderm	ecEp_battery_cell,ecEp_head,enEp_tentacle	head
t12316aep	t12316aep					PREDICTED: mucin-5AC-like [Hydra vulgaris]	0		FALSE	0.596659	905	1	1.15031	0.0430086	i_granular_mucous_gland_cell,i_spumous_mucous_gland_cell	interstitial	i_granular_mucous_gland_cell,i_gland_cell	head
t19302aep	t19302aep|BTG1_CHICK	PF07742.12	BTG	P34743|BTG1_CHICK Protein BTG1 OS=Gallus gallus (Chicken)	3.91e-22	PREDICTED: uncharacterized protein LOC100201130 [Hydra vulgaris]	0	BTG1_CHICK	FALSE	0.59603	906	1	1.19206	0	ecEp_basal_disk,ecEp_battery_cell2(mp),i_female_germline2_nurse,i_nematocyte,i_neuron_ec1,i_neuron_ec3,i_neuron_ec4	ectoderm,germ line,interstitial	ecEp_basal_disk,ecEp_battery_cell,i_female_germline,i_nematocyte,i_neuron_ec	foot,head,body,nerve net
t14982aep	t14982aep|COX5B_HUMAN	PF01215.19	COX5B	P10606|COX5B_HUMAN Cytochrome c oxidase subunit 5B, mitochondrial OS=Homo sapiens (Human)	1.06e-19	PREDICTED: cytochrome c oxidase subunit 5B, mitochondrial-like [Hydra vulgaris]	2.22e-86	COX5B_HUMAN	FALSE	0.59556	907	1	1.19112	0	i_neuron/gland_cell_progenitor,i_neuron_progenitor	interstitial	i_neuron_progenitor	body
t34689aep	t34689aep|RAB14_PONAB	PF00071.22;PF08477.13;PF00025.21	Ras;Roc;Arf	Q5R8Z8|RAB14_PONAB Ras-related protein Rab-14 OS=Pongo abelii (Sumatran orangutan) (Pongo pygmaeus abelii)	9.64e-135	PREDICTED: ras-related protein Rab-14 [Hydra vulgaris]	2.36e-151	RAB14_PONAB	FALSE	0.593766	912	2	0.935207	0.252325	ecEp_basal_disk,ecEp_battery_cell1(mp),ecEp_battery_cell2(mp)	ectoderm	ecEp_basal_disk,ecEp_battery_cell	foot,head
t2497aep	t2497aep|MLRP2_ACRMI	PF00629.23;PF12947.7	MAM;EGF_3	B3EWZ6|MLRP2_ACRMI MAM and LDL-receptor class A domain-containing protein 2 OS=Acropora millepora (Staghorn coral)	4.98e-08	PREDICTED: uncharacterized protein LOC100209198 isoform X1 [Hydra vulgaris]	0	MLRP2_ACRMI	FALSE	0.59368	913	1	1.18736	0	ecEp_battery_cell1(mp),ecEp_battery_cell2(mp),ecEp_head,ecEp_stem_cell	ectoderm	ecEp_battery_cell,ecEp_head,ecEp_stem_cell	head,body
t4162aep	t4162aep|KLF8_HUMAN	PF00096.26;PF13465.6	zf-C2H2;zf-H2C2_2	O95600|KLF8_HUMAN Krueppel-like factor 8 OS=Homo sapiens (Human)	2.59e-43	transcription factor KLF8 [Hydra vulgaris]	0	KLF8_HUMAN	FALSE	0.592661	914	2	0.933806	0.251515	ecEp_battery_cell1(mp),ecEp_battery_cell2(mp),ecEp_head,ecEp_stem_cell,enEp_tent-nem(pd),enEp_tentacle	ectoderm,endoderm	ecEp_battery_cell,ecEp_head,ecEp_stem_cell,enEp_tent-nem,enEp_tentacle	head,body
t5493aep	t5493aep|C9MT_PICPG	PF02353.20;PF08241.12;PF13649.6;PF13489.6;PF13847.6;PF08242.12	CMAS;Methyltransf_11;Methyltransf_25;Methyltransf_23;Methyltransf_31;Methyltransf_12	C4R7Z3|C9MT_PICPG Sphingolipid C9-methyltransferase {ECO:0000303|PubMed:16339149} OS=Komagataella pastoris (strain GS115 / ATCC 20864) (Yeast) (Pichiapastoris)	5.64e-127	PREDICTED: uncharacterized protein LOC100198707 [Hydra vulgaris] >gi|828212628|ref|XP_012559050.1| PREDICTED: uncharacterized protein LOC100198707 [Hydra vulgaris]	0	C9MT_PICPG	FALSE	0.592642	915	1	1.04458	0.140705	ecEp_basal_disk,ecEp_head,ecEp_stem_cell,i_female_germline2_nurse	ectoderm,germ line	ecEp_basal_disk,ecEp_head,ecEp_stem_cell,i_female_germline	foot,head,body
t12551aep	t12551aep|TPRGL_RAT	PF12456.8	hSac2	A8WCF8|TPRGL_RAT Tumor protein p63-regulated gene 1-like protein {ECO:0000250|UniProtKB:Q5T0D9} OS=Rattus norvegicus (Rat)	1.14e-30	PREDICTED: tumor protein p63-regulated gene 1-like protein [Hydra vulgaris] >gi|828209956|ref|XP_012558149.1| PREDICTED: tumor protein p63-regulated gene 1-like protein [Hydra vulgaris] >gi|828209958|ref|XP_012558150.1| PREDICTED: tumor protein p63-regulated gene 1-like protein [Hydra vulgaris]	4.68e-171	TPRGL_RAT	FALSE	0.590063	916	2	0.882359	0.297766	enEp_tent-nem(pd),i_female_germline2_nurse,i_neuron_ec1	endoderm,germ line,ectoderm	enEp_tent-nem,i_female_germline,i_neuron_ec	head,body,nerve net
t19288aep	t19288aep|MK16A_XENLA	PF01778.17;PF04874.14	Ribosomal_L28e;Mak16	Q66L33|MK16A_XENLA Protein MAK16 homolog A OS=Xenopus laevis (African clawed frog)	1.01e-93	PREDICTED: protein MAK16 homolog [Hydra vulgaris]	4.71e-153	MK16A_XENLA	FALSE	0.590059	917	1	1.05119	0.128927	i_female_germline1,i_nb1,i_nb2,i_neuron/gland_cell_progenitor,i_neuron_progenitor,i_stem_cell/progenitor	germ line,interstitial	i_female_germline,i_nb,i_neuron_progenitor,i_stem_cell_progenitor	body
t9539aep	t9539aep|TECR_HUMAN	PF02544.16	Steroid_dh	Q9NZ01|TECR_HUMAN Very-long-chain enoyl-CoA reductase {ECO:0000305} OS=Homo sapiens (Human)	1.43e-126	PREDICTED: LOW QUALITY PROTEIN: very-long-chain enoyl-CoA reductase-like [Hydra vulgaris]	0	TECR_HUMAN	FALSE	0.589607	919	1	1.0876	0.0916147	i_female_germline1	germ line	i_female_germline	body
t14109aep	t14109aep|RLGM2_TRYB2	PF09414.10;PF18043.1	RNA_ligase;T4_Rnl2_C	P86925|RLGM2_TRYB2 RNA-editing ligase 2, mitochondrial OS=Trypanosoma brucei brucei (strain 927/4 GUTat10	8.57e-15	PREDICTED: RNA-editing ligase 2, mitochondrial-like [Hydra vulgaris]	0	RLGM2_TRYB2	FALSE	0.587997	920	1	1.08463	0.0913637	ecEp_basal_disk,ecEp_battery_cell1(mp),ecEp_battery_cell2(mp),enEp_tent-nem(pd),enEp_tentacle,i_nematocyte	ectoderm,endoderm,interstitial	ecEp_basal_disk,ecEp_battery_cell,enEp_tent-nem,enEp_tentacle,i_nematocyte	foot,head
t13321aep	t13321aep|TISB_MOUSE	PF00642.24;PF18345.1	zf-CCCH;zf_CCCH_4	P23950|TISB_MOUSE Zinc finger protein 36, C3H1 type-like 1 OS=Mus musculus (Mouse)	2.71e-44	PREDICTED: zinc finger protein 36, C3H1 type-like 2-B [Hydra vulgaris]	0	TISB_MOUSE	FALSE	0.587933	921	1	1.11082	0.0650458	i_female_germline2_nurse,i_neuron_en2	germ line,endoderm	i_female_germline,i_neuron_en	body,nerve net
t10994aep	t10994aep|NAA15_HUMAN	PF12569.8;PF07719.17;PF13181.6;PF13428.6;PF12895.7;PF14559.6	NARP1;TPR_2;TPR_8;TPR_14;ANAPC3;TPR_19	Q9BXJ9|NAA15_HUMAN N-alpha-acetyltransferase 15, NatA auxiliary subunit OS=Homo sapiens (Human)	0	PREDICTED: N-alpha-acetyltransferase 15, NatA auxiliary subunit-like [Hydra vulgaris]	0	NAA15_HUMAN	FALSE	0.586121	924	1	0.991864	0.180378	i_nb1,i_neuron/gland_cell_progenitor,i_SC,i_stem_cell/progenitor	interstitial	i_nb,i_neuron_progenitor,i_SC,i_stem_cell_progenitor	body
t22784aep	t22784aep|PAPD7_HUMAN	PF03828.19;PF01909.23	PAP_assoc;NTP_transf_2	Q5XG87|PAPD7_HUMAN Non-canonical poly(A) RNA polymerase PAPD7 OS=Homo sapiens (Human)	3.12e-123	PREDICTED: poly(A) RNA polymerase cid14-like [Hydra vulgaris]	0	PAPD7_HUMAN	FALSE	0.585816	925	1	1.04129	0.130341	i_female_germline1,i_SC,i_stem_cell/progenitor	germ line,interstitial	i_female_germline,i_SC,i_stem_cell_progenitor	body
t15525aep	t15525aep|NECB_HYDVU	PF00082.22;PF01483.20	Peptidase_S8;P_proprotein	P29145|NECB_HYDVU PC3-like endoprotease variant B OS=Hydra vulgaris (Hydra) (Hydra attenuata)	3.71e-176	PREDICTED: PC3-like endoprotease variant B [Hydra vulgaris]	0	NECB_HYDVU	FALSE	0.584995	926	1	1.16999	0	ecEp_basal_disk,ecEp_battery_cell1(mp),ecEp_battery_cell2(mp),ecEp_head,i_neuron_ec1,i_neuron_ec2,i_neuron_ec3,i_neuron_ec4,i_neuron_ec5	ectoderm	ecEp_basal_disk,ecEp_battery_cell,ecEp_head,i_neuron_ec	foot,head,nerve net
t3477aep	t3477aep|PFD6_MOUSE	PF01920.20	Prefoldin_2	Q03958|PFD6_MOUSE Prefoldin subunit 6 OS=Mus musculus (Mouse)	7.39e-24	PREDICTED: prefoldin subunit 6-like [Hydra vulgaris]	1.36e-63	PFD6_MOUSE	FALSE	0.584086	928	2	0.919267	0.248905	i_female_germline1,i_male_germline,i_nb1,i_SC,i_stem_cell/progenitor	germ line,interstitial	i_female_germline,i_male_germline,i_nb,i_SC,i_stem_cell_progenitor	body
t29625aep	t29625aep|ZO1_CANLF	PF00595.24;PF00791.20;PF17820.1;PF13180.6;PF02163.22	PDZ;ZU5;PDZ_6;PDZ_2;Peptidase_M50	O97758|ZO1_CANLF Tight junction protein ZO-1 OS=Canis lupus familiaris (Dog) (Canis familiaris)	1.75e-91	tight junction protein ZO-2-like [Hydra vulgaris] >gi|13506761|gb|AAK28322.1|AF230482_1 tight junction protein ZO-1 [Hydra vulgaris]	0	ZO1_CANLF	FALSE	0.583294	929	1	1.11232	0.0542688	ecEp_basal_disk,ecEp_battery_cell1(mp),ecEp_battery_cell2(mp),ecEp_head,ecEp_stem_cell,enEp_tent-nem(pd),i_nematocyte	ectoderm,endoderm,interstitial	ecEp_basal_disk,ecEp_battery_cell,ecEp_head,ecEp_stem_cell,enEp_tent-nem,i_nematocyte	foot,head,body
t1110aep	t1110aep	PF15389.6	DUF4612						FALSE	0.583275	930	2	0.384823	0.781728	ecEp_battery_cell1(mp),ecEp_battery_cell2(mp)	ectoderm	ecEp_battery_cell	head
t28747aep	t28747aep|MYPT2_MOUSE	PF13637.6;PF12796.7;PF13857.6;PF13606.6;PF00023.30	Ank_4;Ank_2;Ank_5;Ank_3;Ank	Q8BG95|MYPT2_MOUSE Protein phosphatase 1 regulatory subunit 12B OS=Mus musculus (Mouse)	1.05e-79	PREDICTED: protein phosphatase 1 regulatory subunit 12A-like [Hydra vulgaris]	0	MYPT2_MOUSE	FALSE	0.58244	931	1	1.16488	0	ecEp_battery_cell1(mp),ecEp_battery_cell2(mp),ecEp_head,ecEp_stem_cell,enEp_foot,enEp_head,enEp_tent-nem(pd),enEp_tentacle	ectoderm,endoderm	ecEp_battery_cell,ecEp_head,ecEp_stem_cell,enEp_foot,enEp_head,enEp_tent-nem,enEp_tentacle	head,body,foot
t20659aep	t20659aep|NUDT3_HUMAN	PF00293.28	NUDIX	O95989|NUDT3_HUMAN Diphosphoinositol polyphosphate phosphohydrolase 1 OS=Homo sapiens (Human)	2.5e-26	PREDICTED: diphosphoinositol polyphosphate phosphohydrolase 1-like [Hydra vulgaris]	1.66e-94	NUDT3_HUMAN	FALSE	0.582156	932	2	0.895727	0.268585	ecEp_battery_cell2(mp),i_female_germline1,i_nematocyte	ectoderm,germ line,interstitial	ecEp_battery_cell,i_female_germline,i_nematocyte	head,body
t21822aep	t21822aep|NAS6_CAEEL	PF01400.24	Astacin	Q9U3S9|NAS6_CAEEL Zinc metalloproteinase nas-6 OS=Caenorhabditis elegans	8.03e-35	PREDICTED: zinc metalloproteinase nas-6-like [Hydra vulgaris]	7.83e-179	NAS6_CAEEL	FALSE	0.582054	933	2	0.851142	0.312965	i_granular_mucous_gland_cell	interstitial	i_granular_mucous_gland_cell	head
t18281aep	t18281aep|CYP5_CAEEL	PF00160.21	Pro_isomerase	P52013|CYP5_CAEEL Peptidyl-prolyl cis-trans isomerase 5 OS=Caenorhabditis elegans	7.92e-81	PREDICTED: peptidyl-prolyl cis-trans isomerase 5-like [Hydra vulgaris]	2.64e-146	CYP5_CAEEL	FALSE	0.581905	934	1	1.02543	0.138379	enEp-nb(pd),enEp-nem(pd),enEp_foot,enEp_head,enEp_SC1,enEp_stem_cell,enEp_tent-nem(pd),enEp_tentacle	endoderm	enEp-nb,enEp-nem,enEp_foot,enEp_head,enEp_SC1,enEp_stem_cell,enEp_tent-nem,enEp_tentacle	body,head,foot
t16424aep	t16424aep|MMP24_RAT	PF00413.24;PF00045.19	Peptidase_M10;Hemopexin	Q99PW6|MMP24_RAT Matrix metalloproteinase-24 OS=Rattus norvegicus (Rat)	1.45e-72	matrix metalloproteinase-14-like precursor [Hydra vulgaris] >gi|5616492|gb|AAD45804.1|AF162688_1 matrix metalloproteinase [Hydra vulgaris]	0	MMP24_RAT	FALSE	0.580998	936	2	0.933465	0.228531	enEp-nb(pd),enEp-nem(pd),enEp_foot,enEp_head,enEp_SC1,enEp_stem_cell,enEp_tent-nem(pd),enEp_tentacle	endoderm	enEp-nb,enEp-nem,enEp_foot,enEp_head,enEp_SC1,enEp_stem_cell,enEp_tent-nem,enEp_tentacle	body,head,foot
t24941aep	t24941aep|ATP5H_BOVIN	PF05873.12	Mt_ATP-synt_D	P13620|ATP5H_BOVIN ATP synthase subunit d, mitochondrial OS=Bos taurus (Bovine)	3.95e-17	PREDICTED: ATP synthase subunit d, mitochondrial-like [Hydra vulgaris]	3.52e-87	ATP5H_BOVIN	FALSE	0.580854	937	2	0.801396	0.360311	i_nb1,i_neuron/gland_cell_progenitor,i_neuron_progenitor	interstitial	i_nb,i_neuron_progenitor	body
t33004aep	t33004aep|CNTP2_HUMAN	PF02210.24;PF00054.23	Laminin_G_2;Laminin_G_1	Q9UHC6|CNTP2_HUMAN Contactin-associated protein-like 2 OS=Homo sapiens (Human)	1.82e-84	PREDICTED: contactin-associated protein-like 2 [Hydra vulgaris] >gi|828194562|ref|XP_012566549.1| PREDICTED: contactin-associated protein-like 2 [Hydra vulgaris]	0	CNTP2_HUMAN	FALSE	0.580652	938	1	1.13664	0.0246637	ecEp_basal_disk,ecEp_battery_cell1(mp),ecEp_battery_cell2(mp),ecEp_head,ecEp_stem_cell,enEp_head	ectoderm,endoderm	ecEp_basal_disk,ecEp_battery_cell,ecEp_head,ecEp_stem_cell,enEp_head	foot,head,body
t21195aep	t21195aep|ATPD_MOUSE	PF02823.16	ATP-synt_DE_N	Q9D3D9|ATPD_MOUSE ATP synthase subunit delta, mitochondrial OS=Mus musculus (Mouse)	4.89e-37	PREDICTED: ATP synthase subunit delta, mitochondrial-like [Hydra vulgaris]	4.27e-111	ATPD_MOUSE	FALSE	0.578285	940	2	0.889776	0.266794	i_neuron/gland_cell_progenitor,i_neuron_progenitor	interstitial	i_neuron_progenitor	body
t32106aep	t32106aep|TLN2_HUMAN	PF01608.17;PF09141.10;PF08913.10;PF00373.18;PF16511.5;PF09379.10	I_LWEQ;Talin_middle;VBS;FERM_M;FERM_f0;FERM_N	Q9Y4G6|TLN2_HUMAN Talin-2 OS=Homo sapiens (Human)	0	PREDICTED: talin-2 [Hydra vulgaris]	0	TLN2_HUMAN	FALSE	0.578102	941	1	1.10538	0.0508243	ecEp_battery_cell1(mp),ecEp_battery_cell2(mp),ecEp_head,ecEp_stem_cell,enEp_foot,enEp_head,enEp_tentacle	ectoderm,endoderm	ecEp_battery_cell,ecEp_head,ecEp_stem_cell,enEp_foot,enEp_head,enEp_tentacle	head,body,foot
t13674aep	t13674aep|SMAG2_MOUSE	PF00536.30	SAM_1	Q80XS6|SMAG2_MOUSE Protein Smaug homolog 2 OS=Mus musculus (Mouse)	7.31e-88	PREDICTED: protein Smaug homolog 1-like [Hydra vulgaris]	0	SMAG2_MOUSE	FALSE	0.576893	945	2	0.95331	0.200477	ecEp_basal_disk,ecEp_battery_cell1(mp),ecEp_battery_cell2(mp),ecEp_stem_cell	ectoderm	ecEp_basal_disk,ecEp_battery_cell,ecEp_stem_cell	foot,head,body
t3951aep	t3951aep|SYHC_MOUSE	PF13393.6;PF03129.20;PF00458.20;PF12745.7	tRNA-synt_His;HGTP_anticodon;WHEP-TRS;HGTP_anticodon2	Q61035|SYHC_MOUSE Histidine--tRNA ligase, cytoplasmic OS=Mus musculus (Mouse)	0	PREDICTED: histidine--tRNA ligase, cytoplasmic-like isoform X1 [Hydra vulgaris]	0	SYHC_MOUSE	FALSE	0.576013	948	1	1.04	0.112026	i_neuron/gland_cell_progenitor	interstitial	i_neuron_progenitor	body
t9150aep	t9150aep|FUBP2_CHICK	PF00013.29;PF07650.17;PF13083.6	KH_1;KH_2;KH_4	Q8UVD9|FUBP2_CHICK Far upstream element-binding protein 2 OS=Gallus gallus (Chicken)	3.51e-39	PREDICTED: far upstream element-binding protein 3-like isoform X1 [Hydra vulgaris] >gi|828211047|ref|XP_012558525.1| PREDICTED: far upstream element-binding protein 3-like isoform X1 [Hydra vulgaris]	0	FUBP2_CHICK	FALSE	0.575988	949	1	1.03864	0.113336	i_female_germline1,i_female_germline2_nurse,i_nb1,i_nb2,i_neuron/gland_cell_progenitor,i_stem_cell/progenitor	germ line,interstitial	i_female_germline,i_nb,i_neuron_progenitor,i_stem_cell_progenitor	body
t14262aep	t14262aep|H2AO_CHITH	PF16211.5;PF00125.24	Histone_H2A_C;Histone	P16886|H2AL_STRPU Late histone H2A.L3 OS=Strongylocentrotus purpuratus (Purple sea urchin)	1.63e-56	PREDICTED: histone H2A [Hydra vulgaris]	1.86e-58	H2AO_CHITH	FALSE	0.573715	951	1	1.14743	0	i_female_germline1,i_female_germline2_nurse,i_male_germline,i_nb1,i_neuron/gland_cell_progenitor,i_stem_cell/progenitor	germ line,interstitial	i_female_germline,i_male_germline,i_nb,i_neuron_progenitor,i_stem_cell_progenitor	body
t14967aep	t14967aep|CSK2B_RAT	PF01214.18	CK_II_beta	P67874|CSK2B_RAT Casein kinase II subunit beta OS=Rattus norvegicus (Rat)	2.82e-135	PREDICTED: casein kinase II subunit beta isoform X1 [Hydra vulgaris]	6.48e-165	CSK2B_RAT	FALSE	0.573675	952	1	1.14735	0	ecEp_battery_cell2(mp),i_female_germline1,i_female_germline2_nurse,i_male_germline	ectoderm,germ line	ecEp_battery_cell,i_female_germline,i_male_germline	head,body
t18258aep	t18258aep|RAB3C_HUMAN	PF00071.22;PF08477.13;PF00025.21	Ras;Roc;Arf	Q96E17|RAB3C_HUMAN Ras-related protein Rab-3C OS=Homo sapiens (Human)	2.1e-109	PREDICTED: ras-related protein Rab-3B-like [Hydra vulgaris] >gi|828210709|ref|XP_012558391.1| PREDICTED: ras-related protein Rab-3B-like [Hydra vulgaris]	1.64e-155	RAB3C_HUMAN	FALSE	0.573429	953	2	0.761567	0.385291	enEp_head,enEp_stem_cell	endoderm	enEp_head,enEp_stem_cell	head,body
t16440aep	t16440aep|AT1A_HYDVU	PF00122.20;PF00689.21;PF13246.6;PF00702.26;PF00690.26	E1-E2_ATPase;Cation_ATPase_C;Cation_ATPase;Hydrolase;Cation_ATPase_N	P35317|AT1A_HYDVU Sodium/potassium-transporting ATPase subunit alpha OS=Hydra vulgaris (Hydra) (Hydra attenuata)	0	Sodium/potassium-transporting ATPase subunit alpha-4 [Hydra vulgaris]	0	AT1A_HYDVU	FALSE	0.57189	954	1	1.08306	0.0607203	ecEp_battery_cell1(mp),ecEp_battery_cell2(mp),ecEp_head,ecEp_stem_cell	ectoderm	ecEp_battery_cell,ecEp_head,ecEp_stem_cell	head,body
t14604aep	t14604aep|LFG4_MOUSE	PF01027.20	Bax1-I	Q9DA39|LFG4_MOUSE Protein lifeguard 4 OS=Mus musculus (Mouse)	3.68e-74	PREDICTED: protein lifeguard 4-like [Hydra vulgaris]	4.77e-149	LFG4_MOUSE	FALSE	0.571658	955	1	1.00738	0.135935	enEp_head,i_spumous_mucous_gland_cell	endoderm,interstitial	enEp_head,i_gland_cell	head
t24800aep	t24800aep|KCP_XENLA	PF00014.23;PF00093.18;PF09619.10	Kunitz_BPTI;VWC;YscW	Q9IBG7|KCP_XENLA Kielin/chordin-like protein OS=Xenopus laevis (African clawed frog)	1.96e-18	cysteine rich BMP regulator 2 precursor [Hydra vulgaris] >gi|37905665|gb|AAO60428.1| chordin-like protein [Hydra vulgaris]	0	KCP_XENLA	FALSE	0.570729	956	1	1.11601	0.025448	enEp-nb(pd),enEp-nem(pd),enEp_foot,enEp_head,enEp_SC1,enEp_stem_cell,enEp_tent-nem(pd),enEp_tentacle	endoderm	enEp-nb,enEp-nem,enEp_foot,enEp_head,enEp_SC1,enEp_stem_cell,enEp_tent-nem,enEp_tentacle	body,head,foot
t22867aep	t22867aep								FALSE	0.570615	957	1	1.14123	0	enEp-nb(pd),enEp-nem(pd),enEp_head,enEp_tentacle	endoderm	enEp-nb,enEp-nem,enEp_head,enEp_tentacle	body,head
t35215aep	t35215aep|MTA1_HUMAN	PF01426.18;PF17226.2;PF00096.26;PF01448.24	BAH;MTA_R1;zf-C2H2;ELM2	Q13330|MTA1_HUMAN Metastasis-associated protein MTA1 OS=Homo sapiens (Human)	2e-163	PREDICTED: metastasis-associated protein MTA3-like [Hydra vulgaris]	0	MTA1_HUMAN	FALSE	0.568775	959	1	1.10303	0.0345194	i_female_germline1,i_nb1,i_neuron/gland_cell_progenitor,i_SC,i_stem_cell/progenitor	germ line,interstitial	i_female_germline,i_nb,i_neuron_progenitor,i_SC,i_stem_cell_progenitor	body
t5837aep	t5837aep								FALSE	0.568415	960	1	1.13683	0	enEp_tent-nem(pd)	endoderm	enEp_tent-nem	head
t21373aep	t21373aep|HSBP1_BOVIN	PF06825.12	HSBP1	Q3ZC22|HSBP1_BOVIN Heat shock factor-binding protein 1 OS=Bos taurus (Bovine)	9.75e-17	PREDICTED: heat shock factor-binding protein 1-like [Hydra vulgaris]	7.46e-50	HSBP1_BOVIN	FALSE	0.567788	961	2	0.848036	0.28754	i_neuron_ec1,i_neuron_ec2,i_neuron_ec3,i_neuron_ec4,i_neuron_en1	ectoderm,endoderm	i_neuron_ec,i_neuron_en	nerve net
t25983aep	t25983aep|SSRG_HUMAN	PF07074.12	TRAP-gamma	Q9UNL2|SSRG_HUMAN Translocon-associated protein subunit gamma OS=Homo sapiens (Human)	6.56e-72	PREDICTED: translocon-associated protein subunit gamma-like [Hydra vulgaris]	1.08e-129	SSRG_HUMAN	FALSE	0.566325	963	1	1.13265	0	i_female_germline2_nurse,i_nb2,i_nb3,i_nb4,i_nb5,i_spumous_mucous_gland_cell	germ line,interstitial	i_female_germline,i_nb,i_gland_cell	body,head
t15936aep	t15936aep	PF08997.10	UCR_6-4kD			PREDICTED: cytochrome b-c1 complex subunit 10-like [Cephus cinctus]	7.69e-08		FALSE	0.566172	964	2	0.845627	0.286716	i_female_germline2_nurse,i_male_germline	germ line	i_female_germline,i_male_germline	body
t22805aep	t22805aep	PF14200.6	RicinB_lectin_2						FALSE	0.565766	965	2	0.561968	0.569565	enEp-nb(pd),enEp-nem(pd),enEp_foot,enEp_head,enEp_SC1,enEp_stem_cell	endoderm	enEp-nb,enEp-nem,enEp_foot,enEp_head,enEp_SC1,enEp_stem_cell	body,head,foot
t21676aep	t21676aep|RIOK3_MOUSE	PF01163.22	RIO1	Q9DBU3|RIOK3_MOUSE Serine/threonine-protein kinase RIO3 OS=Mus musculus (Mouse)	2.7e-140	PREDICTED: serine/threonine-protein kinase RIO3-like [Hydra vulgaris]	0	RIOK3_MOUSE	FALSE	0.564149	966	1	1.06321	0.0650881	ecEp_basal_disk,ecEp_battery_cell1(mp),ecEp_battery_cell2(mp),enEp_tent-nem(pd)	ectoderm,endoderm	ecEp_basal_disk,ecEp_battery_cell,enEp_tent-nem	foot,head
t37740aep	t37740aep|SAL_SILAS	PF02140.18	Gal_Lectin	Q9PVW8|SAL_SILAS Rhamnose-binding lectin OS=Silurus asotus (Amur catfish) (Parasilurus asotus)	1e-37	PREDICTED: rhamnose-binding lectin-like [Hydra vulgaris]	0	SAL_SILAS	FALSE	0.56392	967	1	1.12784	0	ecEp_stem_cell,i_female_germline2_nurse	ectoderm,germ line	ecEp_stem_cell,i_female_germline	body
t10194aep	t10194aep|G3BP1_MOUSE	PF02136.20;PF00076.22	NTF2;RRM_1	P97855|G3BP1_MOUSE Ras GTPase-activating protein-binding protein 1 OS=Mus musculus (Mouse)	7.29e-38	PREDICTED: ras GTPase-activating protein-binding protein 1-like [Hydra vulgaris]	0	G3BP1_MOUSE	FALSE	0.562731	968	1	1.00749	0.117971	i_female_germline1,i_nb1,i_nb2,i_neuron/gland_cell_progenitor,i_SC,i_stem_cell/progenitor	germ line,interstitial	i_female_germline,i_nb,i_neuron_progenitor,i_SC,i_stem_cell_progenitor	body
t24294aep	t24294aep					PREDICTED: uncharacterized protein LOC100208612 isoform X1 [Hydra vulgaris]	2.37e-51		FALSE	0.561995	969	1	1.12399	0	i_female_germline1	germ line	i_female_germline	body
t21449aep	t21449aep					PREDICTED: vascular endothelial growth factor C-like [Hydra vulgaris]	1.18e-162		FALSE	0.559375	972	1	1.11875	0	enEp-nb(pd),enEp-nem(pd),enEp_foot,enEp_head,enEp_SC1,enEp_stem_cell,enEp_tent-nem(pd),enEp_tentacle	endoderm	enEp-nb,enEp-nem,enEp_foot,enEp_head,enEp_SC1,enEp_stem_cell,enEp_tent-nem,enEp_tentacle	body,head,foot
t15226aep	t15226aep	PF14662.6;PF00769.19;PF00170.21;PF06005.12;PF12325.8;PF07889.12;PF17675.1;PF11932.8;PF11559.8	KASH_CCD;ERM;bZIP_1;ZapB;TMF_TATA_bd;DUF1664;APG6_N;DUF3450;ADIP			PREDICTED: putative leucine-rich repeat-containing protein DDB_G0290503 [Hydra vulgaris]	0		FALSE	0.556052	974	2	0.866455	0.245648	ecEp_battery_cell1(mp),ecEp_battery_cell2(mp),ecEp_head,ecEp_stem_cell,enEp_stem_cell,enEp_tent-nem(pd),enEp_tentacle,i_female_germline2_nurse	ectoderm,endoderm,germ line	ecEp_battery_cell,ecEp_head,ecEp_stem_cell,enEp_stem_cell,enEp_tent-nem,enEp_tentacle,i_female_germline	head,body
t19874aep	t19874aep|STT3B_HUMAN	PF02516.14	STT3	Q8TCJ2|STT3B_HUMAN Dolichyl-diphosphooligosaccharide--protein glycosyltransferase subunit STT3B OS=Homo sapiens (Human)	0	PREDICTED: dolichyl-diphosphooligosaccharide--protein glycosyltransferase subunit STT3B [Hydra vulgaris]	0	STT3B_HUMAN	FALSE	0.554846	975	1	0.949887	0.159805	i_nb1,i_nb2,i_neuron/gland_cell_progenitor,i_SC,i_stem_cell/progenitor	interstitial	i_nb,i_neuron_progenitor,i_SC,i_stem_cell_progenitor	body
t13106aep	t13106aep|MAGT1_DANRE	PF04756.13	OST3_OST6	Q7ZV50|MAGT1_DANRE Magnesium transporter protein 1 OS=Danio rerio (Zebrafish) (Brachydanio rerio)	1.32e-123	PREDICTED: tumor suppressor candidate 3-like [Hydra vulgaris]	0	MAGT1_DANRE	FALSE	0.55464	976	1	1.02311	0.0861694	i_nb1	interstitial	i_nb	body
t17593aep	t17593aep	PF15320.6	RAM			PREDICTED: RNMT-activating mini protein-like [Hydra vulgaris]	1.19e-38		FALSE	0.553929	977	2	0.871871	0.235987	i_female_germline1,i_male_germline,i_nb1,i_neuron/gland_cell_progenitor,i_neuron_progenitor,i_stem_cell/progenitor	germ line,interstitial	i_female_germline,i_male_germline,i_nb,i_neuron_progenitor,i_stem_cell_progenitor	body
t19387aep	t19387aep|ERF1_POLMI	PF03464.15;PF03465.15;PF03463.15;PF18859.1;PF18854.1	eRF1_2;eRF1_3;eRF1_1;acVLRF1;baeRF_family10	Q9GR88|ERF1_POLMI Eukaryotic peptide chain release factor subunit 1 OS=Polyandrocarpa misakiensis (Tunicate)	0	PREDICTED: eukaryotic peptide chain release factor subunit 1-like [Hydra vulgaris]	0	ERF1_POLMI	FALSE	0.553763	978	1	0.976067	0.131459	i_nb1,i_nb2,i_neuron/gland_cell_progenitor,i_SC,i_stem_cell/progenitor	interstitial	i_nb,i_neuron_progenitor,i_SC,i_stem_cell_progenitor	body
t7284aep	t7284aep|IF4H_BOVIN	PF00076.22	RRM_1	Q1JPH6|IF4H_BOVIN Eukaryotic translation initiation factor 4H OS=Bos taurus (Bovine)	1.05e-37	PREDICTED: eukaryotic translation initiation factor 4H-like [Hydra vulgaris]	3.86e-133	IF4H_BOVIN	FALSE	0.553032	979	1	0.946635	0.159429	i_female_germline1,i_nb1,i_nb2,i_neuron/gland_cell_progenitor,i_neuron_progenitor,i_stem_cell/progenitor	germ line,interstitial	i_female_germline,i_nb,i_neuron_progenitor,i_stem_cell_progenitor	body
t15929aep	t15929aep|ST17A_RABIT	PF00069.25;PF07714.17	Pkinase;Pkinase_Tyr	Q9GM70|ST17A_RABIT Serine/threonine-protein kinase 17A OS=Oryctolagus cuniculus (Rabbit)	3.73e-70	PREDICTED: serine/threonine-protein kinase dst1-like [Hydra vulgaris] >gi|828223586|ref|XP_012562672.1| PREDICTED: serine/threonine-protein kinase dst1-like [Hydra vulgaris] >gi|828223588|ref|XP_012562673.1| PREDICTED: serine/threonine-protein kinase dst1-like [Hydra vulgaris]	0	ST17A_RABIT	FALSE	0.552955	980	1	1.04939	0.0565195	ecEp_battery_cell1(mp),ecEp_battery_cell2(mp),ecEp_head,ecEp_stem_cell,enEp_tent-nem(pd),enEp_tentacle	ectoderm,endoderm	ecEp_battery_cell,ecEp_head,ecEp_stem_cell,enEp_tent-nem,enEp_tentacle	head,body
t13124aep	t13124aep|GNMT_RAT	PF13649.6;PF13847.6;PF08242.12;PF08241.12;PF13489.6	Methyltransf_25;Methyltransf_31;Methyltransf_12;Methyltransf_11;Methyltransf_23	P13255|GNMT_RAT Glycine N-methyltransferase OS=Rattus norvegicus (Rat)	2.72e-115	PREDICTED: glycine N-methyltransferase-like [Hydra vulgaris]	0	GNMT_RAT	FALSE	0.55206	981	2	0.659475	0.444646	ecEp_battery_cell1(mp),ecEp_battery_cell2(mp),enEp_head,enEp_tent-nem(pd),enEp_tentacle	ectoderm,endoderm	ecEp_battery_cell,enEp_head,enEp_tent-nem,enEp_tentacle	head
t31833aep	t31833aep|BP10_PARLI	PF01400.24	Astacin	P42674|BP10_PARLI Blastula protease 10 OS=Paracentrotus lividus (Common sea urchin)	6.43e-40	PREDICTED: blastula protease 10-like [Hydra vulgaris]	0	BP10_PARLI	FALSE	0.551891	982	1	1.00684	0.0969417	i_granular_mucous_gland_cell	interstitial	i_granular_mucous_gland_cell	head
t15591aep	t15591aep|EBP2_MOUSE	PF05890.12	Ebp2	Q9D903|EBP2_MOUSE Probable rRNA-processing protein EBP2 OS=Mus musculus (Mouse)	3.47e-27	PREDICTED: probable rRNA-processing protein EBP2 [Hydra vulgaris]	6.2e-142	EBP2_MOUSE	FALSE	0.551715	983	1	1.10343	0	i_female_germline1,i_nb1,i_neuron/gland_cell_progenitor,i_stem_cell/progenitor	germ line,interstitial	i_female_germline,i_nb,i_neuron_progenitor,i_stem_cell_progenitor	body
t19754aep	t19754aep|EHD2_ARATH	PF00350.23	Dynamin_N	B3LF48|EHD2_ARATH EH domain-containing protein 2 {ECO:0000303|PubMed:18547399} OS=Arabidopsis thaliana (Mouse-ear cress)	6.1e-09	PREDICTED: uncharacterized protein LOC100199350 [Hydra vulgaris]	0	EHD2_ARATH	FALSE	0.550677	984	1	0.964592	0.136761	i_female_germline2_nurse,i_nb1,i_nb2	germ line,interstitial	i_female_germline,i_nb	body
t31139aep	t31139aep|GRN_HUMAN	PF00396.18	Granulin	P28799|GRN_HUMAN Granulins OS=Homo sapiens (Human)	4.25e-75	PREDICTED: granulins-like, partial [Hydra vulgaris]	0	GRN_HUMAN	FALSE	0.549815	987	1	1.09963	0	ecEp_battery_cell1(mp),ecEp_battery_cell2(mp),enEp-nb(pd),enEp-nem(pd),enEp_foot,enEp_head,enEp_SC1,enEp_stem_cell,enEp_tent-nem(pd),enEp_tentacle	ectoderm,endoderm	ecEp_battery_cell,enEp-nb,enEp-nem,enEp_foot,enEp_head,enEp_SC1,enEp_stem_cell,enEp_tent-nem,enEp_tentacle	head,body,foot
t29162aep	t29162aep|H33_XENTR	PF00125.24	Histone	Q6P823|H33_XENTR Histone H3.3 OS=Xenopus tropicalis (Western clawed frog) (Silurana tropicalis)	9.2e-82	histone H3.1t [Culex quinquefasciatus] >gi|167873992|gb|EDS37375.1| histone H3.1t [Culex quinquefasciatus]	8.74e-81	H33_XENTR	FALSE	0.54925	989	1	1.0985	0	ecEp_basal_disk,ecEp_battery_cell1(mp),ecEp_battery_cell2(mp),enEp_head,enEp_tent-nem(pd),enEp_tentacle,i_male_germline,i_nematocyte	ectoderm,endoderm,germ line,interstitial	ecEp_basal_disk,ecEp_battery_cell,enEp_head,enEp_tent-nem,enEp_tentacle,i_male_germline,i_nematocyte	foot,head,body
t24348aep	t24348aep	PF15898.5	PRKG1_interact			PREDICTED: protein bfr2-like isoform X2 [Hydra vulgaris]	7.03e-113		FALSE	0.549192	990	1	1.0219	0.0764844	ecEp_battery_cell1(mp),ecEp_battery_cell2(mp),ecEp_head,ecEp_stem_cell,enEp_foot,enEp_head,enEp_tentacle	ectoderm,endoderm	ecEp_battery_cell,ecEp_head,ecEp_stem_cell,enEp_foot,enEp_head,enEp_tentacle	head,body,foot
t18356aep	t18356aep|CHIA_MOUSE	PF00704.28	Glyco_hydro_18	Q91XA9|CHIA_MOUSE Acidic mammalian chitinase OS=Mus musculus (Mouse)	2.65e-111	PREDICTED: chitinase-3-like protein 1 [Hydra vulgaris]	0	CHIA_MOUSE	FALSE	0.5481	992	1	1.02143	0.0747694	i_granular_mucous_gland_cell,i_zymogen_gland_cell	interstitial	i_granular_mucous_gland_cell,i_gland_cell	head,body
t23276aep	t23276aep|SEPT7_RAT	PF00735.18;PF01926.23;PF03193.16	Septin;MMR_HSR1;RsgA_GTPase	Q9WVC0|SEPT7_RAT Septin-7 OS=Rattus norvegicus (Rat)	1.82e-151	PREDICTED: septin-7-like isoform X1 [Hydra vulgaris]	0	SEPT7_RAT	FALSE	0.546444	993	2	0.778465	0.314424	ecEp_battery_cell1(mp),ecEp_battery_cell2(mp),enEp_head,enEp_tent-nem(pd),enEp_tentacle,i_female_germline2_nurse,i_nematocyte	ectoderm,endoderm,germ line,interstitial	ecEp_battery_cell,enEp_head,enEp_tent-nem,enEp_tentacle,i_female_germline,i_nematocyte	head,body
t7528aep	t7528aep|TMM59_PIG	PF12280.8	BSMAP	Q2F7Z7|TMM59_PIG Transmembrane protein 59 OS=Sus scrofa (Pig)	2.15e-11	PREDICTED: transmembrane protein 59-like [Hydra vulgaris]	0	TMM59_PIG	FALSE	0.545704	994	2	0.506356	0.585052	ecEp_basal_disk,ecEp_battery_cell1(mp),ecEp_battery_cell2(mp),ecEp_head,i_nematocyte,i_neuron_ec2	ectoderm,interstitial	ecEp_basal_disk,ecEp_battery_cell,ecEp_head,i_nematocyte,i_neuron_ec	foot,head,nerve net
t4043aep	t4043aep|DPY30_MOUSE	PF05186.13	Dpy-30	Q99LT0|DPY30_MOUSE Protein dpy-30 homolog OS=Mus musculus (Mouse)	2.21e-20	PREDICTED: protein dpy-30 homolog isoform X1 [Hydra vulgaris]	1.35e-84	DPY30_MOUSE	FALSE	0.545421	995	1	0.914383	0.176459	i_female_germline1,i_male_germline,i_nb1,i_neuron/gland_cell_progenitor,i_neuron_progenitor,i_stem_cell/progenitor	germ line,interstitial	i_female_germline,i_male_germline,i_nb,i_neuron_progenitor,i_stem_cell_progenitor	body
t17142aep	t17142aep|SSU72_DANRE	PF04722.13	Ssu72	Q6PC19|SSU72_DANRE RNA polymerase II subunit A C-terminal domain phosphatase SSU72 OS=Danio rerio (Zebrafish) (Brachydanio rerio)	2.7e-76	PREDICTED: RNA polymerase II subunit A C-terminal domain phosphatase SSU72-like [Hydra vulgaris]	1.87e-123	SSU72_DANRE	FALSE	0.544475	996	1	1.08895	0	enEp_tent-nem(pd),i_neuron_ec2	endoderm,ectoderm	enEp_tent-nem,i_neuron_ec	head,nerve net
t27742aep	t27742aep|ATP5L_MOUSE	PF04718.15	ATP-synt_G	Q9CPQ8|ATP5L_MOUSE ATP synthase subunit g, mitochondrial OS=Mus musculus (Mouse)	7.5e-13	PREDICTED: ATP synthase subunit g, mitochondrial-like [Hydra vulgaris]	5.57e-78	ATP5L_MOUSE	FALSE	0.543551	997	2	0.571324	0.515778	i_neuron/gland_cell_progenitor,i_neuron_progenitor	interstitial	i_neuron_progenitor	body
t13130aep	t13130aep|TOM40_XENLA	PF01459.22	Porin_3	Q7ZTM6|TOM40_XENLA Mitochondrial import receptor subunit TOM40 homolog OS=Xenopus laevis (African clawed frog)	2.65e-112	PREDICTED: mitochondrial import receptor subunit TOM40 homolog [Hydra vulgaris]	0	TOM40_XENLA	FALSE	0.543285	998	2	0.81273	0.273841	i_female_germline1,i_female_germline2_nurse,i_nb1,i_neuron/gland_cell_progenitor,i_SC,i_stem_cell/progenitor	germ line,interstitial	i_female_germline,i_nb,i_neuron_progenitor,i_SC,i_stem_cell_progenitor	body
t22107aep	t22107aep|MMSA_BOVIN	PF00171.22	Aldedh	Q07536|MMSA_BOVIN Methylmalonate-semialdehyde dehydrogenase [acylating], mitochondrial OS=Bos taurus (Bovine)	0	PREDICTED: probable methylmalonate-semialdehyde dehydrogenase [acylating], mitochondrial [Hydra vulgaris]	0	MMSA_BOVIN	FALSE	0.542501	1000	1	1.02499	0.0600119	enEp-nb(pd),enEp-nem(pd),enEp_foot,enEp_head,enEp_SC1,enEp_stem_cell,enEp_tent-nem(pd),enEp_tentacle	endoderm	enEp-nb,enEp-nem,enEp_foot,enEp_head,enEp_SC1,enEp_stem_cell,enEp_tent-nem,enEp_tentacle	body,head,foot
t32892aep	t32892aep					PREDICTED: uncharacterized protein LOC100198284 [Hydra vulgaris]	3.09e-64		FALSE	0.540875	1002	1	1.08175	0	ecEp_battery_cell1(mp),ecEp_battery_cell2(mp),ecEp_head,ecEp_stem_cell	ectoderm	ecEp_battery_cell,ecEp_head,ecEp_stem_cell	head,body
t9355aep	t9355aep|LAMA_DROME	PF00053.24;PF02210.24;PF00055.17;PF00054.23;PF00052.18;PF06009.12	Laminin_EGF;Laminin_G_2;Laminin_N;Laminin_G_1;Laminin_B;Laminin_II	Q00174|LAMA_DROME Laminin subunit alpha OS=Drosophila melanogaster (Fruit fly)	0	PREDICTED: laminin subunit alpha-3-like [Hydra vulgaris]	0	LAMA_DROME	FALSE	0.540687	1003	2	0.872734	0.208641	enEp-nem(pd),enEp_foot,enEp_head,enEp_SC1,enEp_stem_cell,enEp_tent-nem(pd),enEp_tentacle	endoderm	enEp-nem,enEp_foot,enEp_head,enEp_SC1,enEp_stem_cell,enEp_tent-nem,enEp_tentacle	head,foot,body
t23898aep	t23898aep|4ET_MOUSE	PF10477.9	EIF4E-T	Q9EST3|4ET_MOUSE Eukaryotic translation initiation factor 4E transporter OS=Mus musculus (Mouse)	4.53e-07	PREDICTED: uncharacterized protein LOC100200187 [Hydra vulgaris]	0	4ET_MOUSE	FALSE	0.537844	1004	1	0.979823	0.0958659	i_female_germline1,i_female_germline2_nurse,i_male_germline,i_nb1	germ line,interstitial	i_female_germline,i_male_germline,i_nb	body
t31695aep	t31695aep|ARPC4_MOUSE	PF05856.12	ARPC4	P59999|ARPC4_MOUSE Actin-related protein 2/3 complex subunit 4 OS=Mus musculus (Mouse)	7.55e-102	PREDICTED: actin-related protein 2/3 complex subunit 4 [Hydra vulgaris]	3.27e-114	ARPC4_MOUSE	FALSE	0.53669	1006	1	0.876034	0.197346	ecEp_battery_cell1(mp),ecEp_battery_cell2(mp),enEp_stem_cell	ectoderm,endoderm	ecEp_battery_cell,enEp_stem_cell	head,body
t7837aep	t7837aep|PFD2_HUMAN	PF01920.20	Prefoldin_2	Q9UHV9|PFD2_HUMAN Prefoldin subunit 2 OS=Homo sapiens (Human)	2.42e-46	PREDICTED: prefoldin subunit 2-like [Hydra vulgaris]	3.27e-86	PFD2_HUMAN	FALSE	0.536015	1007	2	0.69589	0.376141	i_nb1,i_nb2,i_neuron/gland_cell_progenitor,i_neuron_progenitor,i_SC,i_stem_cell/progenitor	interstitial	i_nb,i_neuron_progenitor,i_SC,i_stem_cell_progenitor	body
t20399aep	t20399aep|ELAV2_XENTR	PF00076.22;PF13893.6	RRM_1;RRM_5	Q28GD4|ELAV2_XENTR ELAV-like protein 2 OS=Xenopus tropicalis (Western clawed frog) (Silurana tropicalis)	2.68e-89	PREDICTED: ELAV-like protein 3 [Hydra vulgaris]	0	ELAV2_XENTR	FALSE	0.535692	1008	1	1.0205	0.0508845	i_female_germline2_nurse,i_neuron_ec2,i_neuron_ec5,i_neuron_progenitor	germ line,ectoderm,interstitial	i_female_germline,i_neuron_ec,i_neuron_progenitor	body,nerve net
t24562aep	t24562aep|DDX21_HUMAN	PF00270.29;PF00271.31;PF08152.12;PF04851.15	DEAD;Helicase_C;GUCT;ResIII	Q9NR30|DDX21_HUMAN Nucleolar RNA helicase 2 {ECO:0000305} OS=Homo sapiens (Human)	1.43e-175	PREDICTED: nucleolar RNA helicase 2-like [Hydra vulgaris]	0	DDX21_HUMAN	FALSE	0.535515	1009	1	1.07103	0	i_female_germline1,i_nb1,i_nb2,i_neuron/gland_cell_progenitor,i_stem_cell/progenitor	germ line,interstitial	i_female_germline,i_nb,i_neuron_progenitor,i_stem_cell_progenitor	body
t2852aep	t2852aep								FALSE	0.535175	1010.5	1	1.07035	0	ecEp_basal_disk,ecEp_battery_cell1(mp),ecEp_battery_cell2(mp),enEp-nb(pd),enEp-nem(pd),enEp_foot,enEp_head,enEp_SC1,enEp_stem_cell,enEp_tent-nem(pd),enEp_tentacle	ectoderm,endoderm	ecEp_basal_disk,ecEp_battery_cell,enEp-nb,enEp-nem,enEp_foot,enEp_head,enEp_SC1,enEp_stem_cell,enEp_tent-nem,enEp_tentacle	foot,head,body
t307aep	t307aep	PF00170.21;PF07716.15	bZIP_1;bZIP_2			PREDICTED: cyclic AMP-dependent transcription factor ATF-3-like [Hydra vulgaris]	1.93e-71		FALSE	0.535175	1010.5	1	1.07035	0	i_nb4,i_nb5	interstitial	i_nb	body
t12874aep	t12874aep					PREDICTED: uncharacterized protein LOC105844853 [Hydra vulgaris] >gi|6009646|dbj|BAA85005.1| Hym-355 preprohormone [Hydra vulgaris]	3.8e-56		FALSE	0.533546	1013	1	0.870907	0.196185	i_neuron_ec3	ectoderm	i_neuron_ec	nerve net
t15598aep	t15598aep|KC1A_MOUSE	PF00069.25;PF07714.17;PF17667.1	Pkinase;Pkinase_Tyr;Pkinase_fungal	Q8BK63|KC1A_MOUSE Casein kinase I isoform alpha OS=Mus musculus (Mouse)	0	PREDICTED: casein kinase I isoform alpha isoform X2 [Hydra vulgaris]	0	KC1A_MOUSE	FALSE	0.53325	1014	2	0.820852	0.245648	i_male_germline,i_nb1,i_SC,i_stem_cell/progenitor	germ line,interstitial	i_male_germline,i_nb,i_SC,i_stem_cell_progenitor	body
t27575aep	t27575aep|LS14B_XENTR	PF12701.7;PF09532.10	LSM14;FDF	Q566L7|LS14B_XENTR Protein LSM14 homolog B OS=Xenopus tropicalis (Western clawed frog) (Silurana tropicalis)	1.33e-38	PREDICTED: protein LSM14 homolog [Hydra vulgaris]	0	LS14B_XENTR	FALSE	0.532665	1015	1	1.06533	0	i_female_germline1,i_female_germline2_nurse,i_male_germline,i_SC,i_stem_cell/progenitor	germ line,interstitial	i_female_germline,i_male_germline,i_SC,i_stem_cell_progenitor	body
t7059aep	t7059aep|MUC2_RAT	PF00094.25;PF08742.11;PF01826.17;PF00093.18	VWD;C8;TIL;VWC	Q62635|MUC2_RAT Mucin-2 OS=Rattus norvegicus (Rat)	1.71e-157	PREDICTED: mucin-5AC-like [Hydra vulgaris]	0	MUC2_RAT	FALSE	0.531753	1017	1	1.02468	0.0388262	i_granular_mucous_gland_cell,i_spumous_mucous_gland_cell	interstitial	i_granular_mucous_gland_cell,i_gland_cell	head
t26310aep	t26310aep|RAVR1_RAT	PF00076.22	RRM_1	Q5XI28|RAVR1_RAT Ribonucleoprotein PTB-binding 1 OS=Rattus norvegicus (Rat)	2.23e-25	PREDICTED: mediator of RNA polymerase II transcription subunit 12-like isoform X1 [Hydra vulgaris]	0	RAVR1_RAT	FALSE	0.531155	1020	1	1.00907	0.0532392	i_female_germline1,i_nb1,i_neuron/gland_cell_progenitor,i_stem_cell/progenitor	germ line,interstitial	i_female_germline,i_nb,i_neuron_progenitor,i_stem_cell_progenitor	body
t38581aep	t38581aep|HE_HEMPU	PF00413.24;PF01471.18;PF01549.24	Peptidase_M10;PG_binding_1;ShK	P91953|HE_HEMPU 50 kDa hatching enzyme OS=Hemicentrotus pulcherrimus (Sea urchin) (Strongylocentrotuspulcherrimus)	1.36e-46	PREDICTED: 50 kDa hatching enzyme-like [Hydra vulgaris]	0	HE_HEMPU	FALSE	0.531032	1021	2	0.658668	0.403396	i_granular_mucous_gland_cell,i_zymogen_gland_cell	interstitial	i_granular_mucous_gland_cell,i_gland_cell	head,body
t34367aep	t34367aep|PIWL1_HUMAN	PF02171.17;PF02170.22	Piwi;PAZ	Q96J94|PIWL1_HUMAN Piwi-like protein 1 OS=Homo sapiens (Human)	0	PIWI [Hydra vulgaris]	0	PIWL1_HUMAN	FALSE	0.530977	1022	1	0.930196	0.131758	i_female_germline1,i_female_germline2_nurse,i_SC,i_stem_cell/progenitor	germ line,interstitial	i_female_germline,i_SC,i_stem_cell_progenitor	body
t28892aep	t28892aep|GILT_HUMAN	PF03227.16	GILT	P13284|GILT_HUMAN Gamma-interferon-inducible lysosomal thiol reductase OS=Homo sapiens (Human)	6.17e-38	PREDICTED: gamma-interferon-inducible lysosomal thiol reductase-like [Hydra vulgaris]	3.85e-163	GILT_HUMAN	FALSE	0.530971	1023	2	0.794077	0.267865	enEp_tent-nem(pd),enEp_tentacle	endoderm	enEp_tent-nem,enEp_tentacle	head
t35994aep	t35994aep|MLRP2_ACRMI	PF00629.23;PF00057.18;PF00040.19;PF00088.18	MAM;Ldl_recept_a;fn2;Trefoil	B3EWZ6|MLRP2_ACRMI MAM and LDL-receptor class A domain-containing protein 2 OS=Acropora millepora (Staghorn coral)	0	PREDICTED: MAM and LDL-receptor class A domain-containing protein 1-like [Hydra vulgaris]	0	MLRP2_ACRMI	FALSE	0.530448	1024	1	1.05613	0.00476534	enEp-nb(pd),enEp-nem(pd),enEp_foot,enEp_head,enEp_SC1,enEp_stem_cell	endoderm	enEp-nb,enEp-nem,enEp_foot,enEp_head,enEp_SC1,enEp_stem_cell	body,head,foot
t29424aep	t29424aep	PF01391.18	Collagen						FALSE	0.529462	1025	1	0.889359	0.169564	enEp-nb(pd),i_nb3,i_nb4,i_nb5,i_nematocyte	endoderm,interstitial	enEp-nb,i_nb,i_nematocyte	body,head
t27702aep	t27702aep|CYT_BITAR			P08935|CYT_BITAR Cystatin OS=Bitis arietans (African puff adder)	1.82e-07	PREDICTED: cystatin JZTX-75-like [Hydra vulgaris]	2.29e-39	CYT_BITAR	FALSE	0.529411	1026	1	0.864164	0.194658	i_granular_mucous_gland_cell,i_spumous_mucous_gland_cell,i_zymogen_gland_cell	interstitial	i_granular_mucous_gland_cell,i_gland_cell	head,body
t16853aep	t16853aep|ZCH10_MOUSE	PF13917.6	zf-CCHC_3	Q9CX48|ZCH10_MOUSE Zinc finger CCHC domain-containing protein 10 OS=Mus musculus (Mouse)	7.76e-11	PREDICTED: zinc finger CCHC domain-containing protein 10-like [Hydra vulgaris]	1.21e-35	ZCH10_MOUSE	FALSE	0.529325	1027	1	1.05865	0	ecEp_battery_cell1(mp),ecEp_battery_cell2(mp),i_female_germline1	ectoderm,germ line	ecEp_battery_cell,i_female_germline	head,body
t19185aep	t19185aep|LASP1_RAT	PF00880.18;PF00018.28;PF14604.6;PF00412.22;PF07653.17	Nebulin;SH3_1;SH3_9;LIM;SH3_2	Q99MZ8|LASP1_RAT LIM and SH3 domain protein 1 OS=Rattus norvegicus (Rat)	5.33e-67	PREDICTED: LIM and SH3 domain protein 1-like [Hydra vulgaris]	1.49e-132	LASP1_RAT	FALSE	0.527934	1028	1	0.862171	0.193696	ecEp_battery_cell1(mp),ecEp_battery_cell2(mp),enEp-nb(pd),enEp-nem(pd),enEp_foot,enEp_head,enEp_SC1,enEp_stem_cell,enEp_tent-nem(pd),enEp_tentacle	ectoderm,endoderm	ecEp_battery_cell,enEp-nb,enEp-nem,enEp_foot,enEp_head,enEp_SC1,enEp_stem_cell,enEp_tent-nem,enEp_tentacle	head,body,foot
t6894aep	t6894aep|PCM1_XENLA	PF15717.5	PCM1_C	Q9PVV4|PCM1_XENLA Pericentriolar material 1 protein OS=Xenopus laevis (African clawed frog)	1.23e-56	PREDICTED: pericentriolar material 1 protein-like, partial [Hydra vulgaris]	0	PCM1_XENLA	FALSE	0.527894	1029	1	0.966725	0.0890629	i_female_germline1,i_male_germline,i_nb1,i_neuron/gland_cell_progenitor,i_SC,i_stem_cell/progenitor	germ line,interstitial	i_female_germline,i_male_germline,i_nb,i_neuron_progenitor,i_SC,i_stem_cell_progenitor	body
t31816aep	t31816aep|TSP1_XENLA	PF00092.28;PF13519.6;PF00090.19	VWA;VWA_2;TSP_1	P35448|TSP1_XENLA Thrombospondin-1 OS=Xenopus laevis (African clawed frog)	2.15e-11	PREDICTED: uncharacterized protein LOC100206334, partial [Hydra vulgaris]	0	TSP1_XENLA	FALSE	0.525725	1030	1	1.0363	0.01515	ecEp_battery_cell1(mp),ecEp_battery_cell2(mp)	ectoderm	ecEp_battery_cell	head
t17028aep	t17028aep|UB2V2_CHICK	PF00179.26	UQ_con	Q5F3Z3|UB2V2_CHICK Ubiquitin-conjugating enzyme E2 variant 2 OS=Gallus gallus (Chicken)	8.47e-54	PREDICTED: ubiquitin-conjugating enzyme E2 variant 2-like [Hydra vulgaris]	4.08e-87	UB2V2_CHICK	FALSE	0.525376	1031	1	0.964134	0.0866171	i_female_germline2_nurse	germ line	i_female_germline	body
t20207aep	t20207aep|GAR1_HUMAN	PF04410.14	Gar1	Q9NY12|GAR1_HUMAN H/ACA ribonucleoprotein complex subunit 1 OS=Homo sapiens (Human)	1.75e-41	PREDICTED: H/ACA ribonucleoprotein complex subunit 1-like [Hydra vulgaris]	1.01e-69	GAR1_HUMAN	FALSE	0.52405	1032	1	1.0481	0	i_female_germline1,i_neuron/gland_cell_progenitor,i_SC,i_stem_cell/progenitor	germ line,interstitial	i_female_germline,i_neuron_progenitor,i_SC,i_stem_cell_progenitor	body
t35993aep	t35993aep|VATE_DROME	PF01991.18	vATP-synt_E	P54611|VATE_DROME V-type proton ATPase subunit E OS=Drosophila melanogaster (Fruit fly)	2.44e-73	PREDICTED: V-type proton ATPase subunit E-like [Hydra vulgaris]	3.16e-141	VATE_DROME	FALSE	0.523535	1033	1	1.04707	0	ecEp_battery_cell1(mp),ecEp_battery_cell2(mp),ecEp_head,ecEp_stem_cell	ectoderm	ecEp_battery_cell,ecEp_head,ecEp_stem_cell	head,body
t31824aep	t31824aep|DNJC5_TETCF	PF00226.31	DnaJ	P56101|DNJC5_TETCF DnaJ homolog subfamily C member 5 {ECO:0000250|UniProtKB:Q9H3Z4} OS=Tetronarce californica (Pacific electric ray) (Torpedo californica)	1.98e-40	PREDICTED: cysteine string protein-like isoform X2 [Hydra vulgaris]	1.52e-129	DNJC5_TETCF	FALSE	0.523161	1036	1	0.965052	0.081269	ecEp_basal_disk,ecEp_battery_cell1(mp),ecEp_battery_cell2(mp),i_neuron_ec1,i_neuron_ec4	ectoderm	ecEp_basal_disk,ecEp_battery_cell,i_neuron_ec	foot,head,nerve net
t1658aep	t1658aep|YS51_CAEEL	PF01549.24	ShK	Q09662|YS51_CAEEL Uncharacterized protein ZK673.1 OS=Caenorhabditis elegans	2.04e-08	PREDICTED: uncharacterized protein ZK643.6-like [Hydra vulgaris]	0	YS51_CAEEL	FALSE	0.522844	1037	1	0.91585	0.129838	ecEp_battery_cell1(mp),ecEp_battery_cell2(mp),ecEp_stem_cell,enEp-nb(pd),enEp-nem(pd),enEp_foot,enEp_head,enEp_SC1,enEp_stem_cell,enEp_tent-nem(pd),enEp_tentacle	ectoderm,endoderm	ecEp_battery_cell,ecEp_stem_cell,enEp-nb,enEp-nem,enEp_foot,enEp_head,enEp_SC1,enEp_stem_cell,enEp_tent-nem,enEp_tentacle	head,body,foot
t36989aep	t36989aep|GPX5_PIG			O18994|GPX5_PIG Epididymal secretory glutathione peroxidase OS=Sus scrofa (Pig)	1.88e-38	PREDICTED: glutathione peroxidase-like [Hydra vulgaris]	6.18e-150	GPX5_PIG	FALSE	0.522628	1038	2	0.721136	0.32412	enEp-nb(pd),enEp-nem(pd),enEp_foot,enEp_head,enEp_SC1,enEp_stem_cell,enEp_tent-nem(pd),enEp_tentacle	endoderm	enEp-nb,enEp-nem,enEp_foot,enEp_head,enEp_SC1,enEp_stem_cell,enEp_tent-nem,enEp_tentacle	body,head,foot
t12614aep	t12614aep|ASAL_ALLSA	PF01453.24	B_lectin	P83886|ASAL_ALLSA Mannose-specific lectin OS=Allium sativum (Garlic)	2.31e-14	PREDICTED: mannose-specific lectin-like [Hydra vulgaris]	7.32e-129	ASAL_ALLSA	FALSE	0.522215	1040	1	1.04443	0	ecEp_head,ecEp_stem_cell	ectoderm	ecEp_head,ecEp_stem_cell	head,body
t760aep	t760aep|MCU_DANRE	PF04678.13	MCU	Q08BI9|MCU_DANRE Calcium uniporter protein, mitochondrial OS=Danio rerio (Zebrafish) (Brachydanio rerio)	9.22e-91	PREDICTED: calcium uniporter protein, mitochondrial-like [Hydra vulgaris]	0	MCU_DANRE	FALSE	0.521632	1041	1	0.951649	0.0916147	ecEp_battery_cell1(mp),ecEp_battery_cell2(mp),ecEp_head,ecEp_stem_cell,i_female_germline2_nurse	ectoderm,germ line	ecEp_battery_cell,ecEp_head,ecEp_stem_cell,i_female_germline	head,body
t25395aep	t25395aep					PREDICTED: uncharacterized protein LOC105849045 [Hydra vulgaris]	5.14e-58		FALSE	0.521115	1042	1	1.04223	0	ecEp_battery_cell1(mp),ecEp_battery_cell2(mp),ecEp_head,ecEp_stem_cell	ectoderm	ecEp_battery_cell,ecEp_head,ecEp_stem_cell	head,body
t3447aep	t3447aep|CYC_PECGU	PF00034.21	Cytochrom_C	Q6QLW4|CYC_PECGU Cytochrome c OS=Pectinaria gouldii (Trumpet worm) (Ice-cream cone worm)	7.1e-56	PREDICTED: cytochrome c-like [Hydra vulgaris]	2.43e-73	CYC_PECGU	FALSE	0.519526	1045	2	0.690055	0.348997	enEp_foot,enEp_SC1,enEp_stem_cell,i_neuron_en3	endoderm	enEp_foot,enEp_SC1,enEp_stem_cell,i_neuron_en	foot,body,nerve net
t32796aep	t32796aep|DUS16_HUMAN	PF00782.20	DSPc	Q9BY84|DUS16_HUMAN Dual specificity protein phosphatase 16 OS=Homo sapiens (Human)	1.02e-40	PREDICTED: dual specificity protein phosphatase 16-like [Hydra vulgaris]	0	DUS16_HUMAN	FALSE	0.51897	1047	1	1.03794	0	ecEp_basal_disk,ecEp_battery_cell1(mp),ecEp_battery_cell2(mp),ecEp_head,ecEp_stem_cell	ectoderm	ecEp_basal_disk,ecEp_battery_cell,ecEp_head,ecEp_stem_cell	foot,head,body
t29913aep	t29913aep|PGK_CAEEL	PF00162.19	PGK	P91427|PGK_CAEEL Probable phosphoglycerate kinase OS=Caenorhabditis elegans	3.5e-173	PREDICTED: probable phosphoglycerate kinase [Hydra vulgaris]	0	PGK_CAEEL	FALSE	0.518713	1048	1	0.914299	0.123126	ecEp_battery_cell1(mp),ecEp_battery_cell2(mp),ecEp_head,enEp_tentacle	ectoderm,endoderm	ecEp_battery_cell,ecEp_head,enEp_tentacle	head
t1131aep	t1131aep|MYPH_ECHGR	PF00307.31;PF00402.18	CH;Calponin	Q24799|MYPH_ECHGR Myophilin OS=Echinococcus granulosus (Hydatid tapeworm)	1.27e-44	PREDICTED: myophilin-like [Hydra vulgaris] >gi|828196927|ref|XP_012553700.1| PREDICTED: myophilin-like [Hydra vulgaris]	1.08e-133	MYPH_ECHGR	FALSE	0.517741	1050	2	0.514377	0.521104	ecEp_head,ecEp_stem_cell,enEp-nb(pd),enEp-nem(pd),enEp_foot,enEp_head,enEp_SC1,enEp_stem_cell	ectoderm,endoderm	ecEp_head,ecEp_stem_cell,enEp-nb,enEp-nem,enEp_foot,enEp_head,enEp_SC1,enEp_stem_cell	head,body,foot
t17969aep	t17969aep|T214B_XENLA	PF10151.9	TMEM214	A1L2I9|T214B_XENLA Transmembrane protein 214-B OS=Xenopus laevis (African clawed frog)	9.62e-18	PREDICTED: uncharacterized protein LOC100212344 [Hydra vulgaris]	0	T214B_XENLA	FALSE	0.515612	1054	1	0.859778	0.171445	ecEp_basal_disk,i_neuron_ec1	ectoderm	ecEp_basal_disk,i_neuron_ec	foot,nerve net
t34608aep	t34608aep|CATL_SARPE	PF00112.23;PF08246.12	Peptidase_C1;Inhibitor_I29	Q26636|CATL_SARPE Cathepsin L OS=Sarcophaga peregrina (Flesh fly) (Boettcherisca peregrina)	2.44e-65	PREDICTED: cathepsin L1-like isoform X1 [Hydra vulgaris]	1.2e-169	CATL_SARPE	FALSE	0.514635	1056	1	1.02927	0	ecEp_battery_cell1(mp),ecEp_battery_cell2(mp)	ectoderm	ecEp_battery_cell	head
t14102aep	t14102aep					dickkopf-like protein Dlp-1 precursor [Hydra vulgaris] >gi|74101636|gb|AAZ99727.1| dickkopf-like protein Dlp-1 precursor [Hydra vulgaris]	1.27e-52		FALSE	0.514618	1057	2	0.708508	0.320729	i_zymogen_gland_cell	interstitial	i_gland_cell	body
t12037aep	t12037aep|PLS1_RAT	PF03803.15	Scramblase	P58195|PLS1_RAT Phospholipid scramblase 1 OS=Rattus norvegicus (Rat)	9.93e-90	PREDICTED: phospholipid scramblase 1-like isoform X1 [Hydra vulgaris]	2.19e-153	PLS1_RAT	FALSE	0.512158	1064	1	0.920857	0.103459	ecEp_battery_cell1(mp),ecEp_battery_cell2(mp),enEp-nem(pd),enEp_head,enEp_SC1,enEp_stem_cell,i_neuron_ec2	ectoderm,endoderm	ecEp_battery_cell,enEp-nem,enEp_head,enEp_SC1,enEp_stem_cell,i_neuron_ec	head,body,nerve net
t36963aep	t36963aep|PPID_HUMAN	PF00160.21;PF00515.28;PF07719.17	Pro_isomerase;TPR_1;TPR_2	Q08752|PPID_HUMAN Peptidyl-prolyl cis-trans isomerase D OS=Homo sapiens (Human)	1.26e-122	PREDICTED: peptidyl-prolyl cis-trans isomerase D-like [Hydra vulgaris]	0	PPID_HUMAN	FALSE	0.511115	1065	1	1.02223	0	i_male_germline	germ line	i_male_germline	body
t18962aep	t18962aep	PF00431.20	CUB			PREDICTED: uncharacterized protein LOC100201118 [Hydra vulgaris]	0		FALSE	0.510405	1066	1	0.873689	0.14712	ecEp_battery_cell1(mp),ecEp_battery_cell2(mp),enEp_tent-nem(pd),enEp_tentacle	ectoderm,endoderm	ecEp_battery_cell,enEp_tent-nem,enEp_tentacle	head
t14022aep	t14022aep|DEK_MOUSE	PF08766.11	DEK_C	Q7TNV0|DEK_MOUSE Protein DEK OS=Mus musculus (Mouse)	2.38e-15	PREDICTED: protein DEK-like [Hydra vulgaris]	2e-133	DEK_MOUSE	FALSE	0.51017	1067	1	1.02034	0	i_female_germline1,i_male_germline,i_nb1,i_nb2,i_neuron/gland_cell_progenitor,i_neuron_progenitor,i_stem_cell/progenitor	germ line,interstitial	i_female_germline,i_male_germline,i_nb,i_neuron_progenitor,i_stem_cell_progenitor	body
t20186aep	t20186aep|YXIE_BACSU	PF00582.26	Usp	P42297|YXIE_BACSU Universal stress protein YxiE OS=Bacillus subtilis (strain 168)	6.39e-14	PREDICTED: universal stress protein A-like protein [Hydra vulgaris]	3.33e-48	YXIE_BACSU	FALSE	0.508885	1068	2	0.56231	0.455461	ecEp_battery_cell1(mp),ecEp_battery_cell2(mp),ecEp_head,i_nematocyte	ectoderm,interstitial	ecEp_battery_cell,ecEp_head,i_nematocyte	head
t22121aep	t22121aep|SORL_MOUSE	PF15902.5;PF00057.18;PF15901.5;PF00058.17;PF08450.12	Sortilin-Vps10;Ldl_recept_a;Sortilin_C;Ldl_recept_b;SGL	O88307|SORL_MOUSE Sortilin-related receptor OS=Mus musculus (Mouse)	0	PREDICTED: sortilin-related receptor-like [Hydra vulgaris]	0	SORL_MOUSE	FALSE	0.50818	1069	1	1.01636	0	ecEp_battery_cell1(mp),ecEp_battery_cell2(mp),enEp_tent-nem(pd)	ectoderm,endoderm	ecEp_battery_cell,enEp_tent-nem	head
t25885aep	t25885aep|SRRM2_MOUSE	PF08312.12	cwf21	Q8BTI8|SRRM2_MOUSE Serine/arginine repetitive matrix protein 2 OS=Mus musculus (Mouse)	1.24e-26	PREDICTED: serine/arginine repetitive matrix protein 2-like [Hydra vulgaris]	1.5e-148	SRRM2_MOUSE	FALSE	0.507856	1070	1	0.9584	0.0573111	i_female_germline1,i_female_germline2_nurse,i_male_germline,i_nb1,i_nb2,i_neuron/gland_cell_progenitor,i_stem_cell/progenitor	germ line,interstitial	i_female_germline,i_male_germline,i_nb,i_neuron_progenitor,i_stem_cell_progenitor	body
t6783aep	t6783aep|PSMD7_MOUSE	PF13012.6;PF01398.21	MitMem_reg;JAB	P26516|PSMD7_MOUSE 26S proteasome non-ATPase regulatory subunit 7 OS=Mus musculus (Mouse)	6.05e-136	PREDICTED: 26S proteasome non-ATPase regulatory subunit 7-like [Hydra vulgaris]	0	PSMD7_MOUSE	FALSE	0.507165	1071	1	1.01433	0	i_female_germline1,i_male_germline,i_nb1,i_neuron/gland_cell_progenitor,i_neuron_en2,i_neuron_progenitor,i_SC,i_stem_cell/progenitor	germ line,interstitial,endoderm	i_female_germline,i_male_germline,i_nb,i_neuron_progenitor,i_neuron_en,i_SC,i_stem_cell_progenitor	body,nerve net
t5075aep	t5075aep|NPC2_DANRE	PF02221.15	E1_DerP2_DerF2	Q9DGJ3|NPC2_DANRE Epididymal secretory protein E1 OS=Danio rerio (Zebrafish) (Brachydanio rerio)	3.85e-18	PREDICTED: protein NPC2 homolog [Hydra vulgaris]	4.53e-92	NPC2_DANRE	FALSE	0.506584	1072	2	0.559772	0.453397	enEp-nb(pd),enEp-nem(pd),enEp_foot,enEp_head,enEp_SC1,enEp_stem_cell,enEp_tent-nem(pd),enEp_tentacle	endoderm	enEp-nb,enEp-nem,enEp_foot,enEp_head,enEp_SC1,enEp_stem_cell,enEp_tent-nem,enEp_tentacle	body,head,foot
t29369aep	t29369aep|CSL3_ONCKE	PF02140.18	Gal_Lectin	P86179|CSL3_ONCKE L-rhamnose-binding lectin CSL3 {ECO:0000303|Ref.1} OS=Oncorhynchus keta (Chum salmon) (Salmo keta)	1.01e-38	PREDICTED: rhamnose-binding lectin-like [Hydra vulgaris]	1.29e-95	CSL3_ONCKE	FALSE	0.505887	1073	1	0.8258	0.185973	ecEp_basal_disk	ectoderm	ecEp_basal_disk	foot
t14915aep	t14915aep|IF4G1_MOUSE	PF02854.19;PF02847.17;PF02020.18	MIF4G;MA3;W2	Q6NZJ6|IF4G1_MOUSE Eukaryotic translation initiation factor 4 gamma 1 OS=Mus musculus (Mouse)	6.23e-144	PREDICTED: eukaryotic translation initiation factor 4 gamma 1-like, partial [Hydra vulgaris]	0	IF4G1_MOUSE	FALSE	0.505067	1074	1	0.924377	0.0857572	i_female_germline1,i_female_germline2_nurse,i_nb1,i_nb2,i_neuron/gland_cell_progenitor,i_SC,i_stem_cell/progenitor	germ line,interstitial	i_female_germline,i_nb,i_neuron_progenitor,i_SC,i_stem_cell_progenitor	body
t12805aep	t12805aep|TMED_NEMVE	PF01105.24	EMP24_GP25L	A7SXK3|TMED_NEMVE Transmembrane emp24 domain-containing protein OS=Nematostella vectensis (Starlet sea anemone)	2.26e-109	PREDICTED: transmembrane emp24 domain-containing protein-like [Hydra vulgaris]	2.29e-143	TMED_NEMVE	FALSE	0.505055	1075	1	1.01011	0	ecEp_basal_disk,i_nb2,i_nb3,i_spumous_mucous_gland_cell	ectoderm,interstitial	ecEp_basal_disk,i_nb,i_gland_cell	foot,body,head
t17572aep	t17572aep								FALSE	0.503552	1079	2	0.538539	0.468565	i_female_germline1,i_female_germline2_nurse,i_neuron/gland_cell_progenitor	germ line,interstitial	i_female_germline,i_neuron_progenitor	body
t34731aep	t34731aep	PF01391.18	Collagen						FALSE	0.503212	1080	2	0.60052	0.405903	enEp-nb(pd),i_nb4	endoderm,interstitial	enEp-nb,i_nb	body
t4544aep	t4544aep					PREDICTED: uncharacterized protein LOC100214616 [Hydra vulgaris]	4.55e-68		FALSE	0.502829	1081	2	0.725801	0.279856	ecEp_basal_disk,ecEp_battery_cell1(mp),ecEp_head,ecEp_stem_cell	ectoderm	ecEp_basal_disk,ecEp_battery_cell,ecEp_head,ecEp_stem_cell	foot,head,body
t10355aep	t10355aep|PCNA_MACFA	PF02747.15;PF00705.18	PCNA_C;PCNA_N	P61258|PCNA_MACFA Proliferating cell nuclear antigen OS=Macaca fascicularis (Crab-eating macaque) (Cynomolgus monkey)	6.41e-103	PREDICTED: proliferating cell nuclear antigen-like [Hydra vulgaris]	1.73e-176	PCNA_MACFA	FALSE	0.501965	1083	1	1.00393	0	i_female_germline1,i_female_germline2_nurse,i_male_germline,i_nb1,i_nb2,i_neuron/gland_cell_progenitor,i_neuron_progenitor,i_stem_cell/progenitor	germ line,interstitial	i_female_germline,i_male_germline,i_nb,i_neuron_progenitor,i_stem_cell_progenitor	body
t19312aep	t19312aep					PREDICTED: sex-determining region Y protein-like [Hydra vulgaris]	4.95e-13		FALSE	0.50175	1084	1	1.0035	0	ecEp_battery_cell2(mp),enEp_tent-nem(pd),i_nematocyte,i_neuron_ec1,i_neuron_ec2,i_neuron_ec4,i_neuron_ec5	ectoderm,endoderm,interstitial	ecEp_battery_cell,enEp_tent-nem,i_nematocyte,i_neuron_ec	head,nerve net
t16436aep	t16436aep|TM165_HUMAN	PF01169.19	UPF0016	Q9HC07|TM165_HUMAN Transmembrane protein 165 OS=Homo sapiens (Human)	1.29e-86	PREDICTED: transmembrane protein 165-like [Hydra vulgaris]	0	TM165_HUMAN	FALSE	0.501598	1085	2	0.673297	0.3299	ecEp_battery_cell1(mp),ecEp_battery_cell2(mp),ecEp_head,i_female_germline2_nurse	ectoderm,germ line	ecEp_battery_cell,ecEp_head,i_female_germline	head,body
t1860aep	t1860aep|PSA2_HUMAN	PF00227.26;PF10584.9	Proteasome;Proteasome_A_N	P25787|PSA2_HUMAN Proteasome subunit alpha type-2 OS=Homo sapiens (Human)	3.89e-133	PREDICTED: proteasome subunit alpha type-2-like [Hydra vulgaris]	1.57e-169	PSA2_HUMAN	FALSE	0.500102	1088	1	0.890984	0.10922	i_female_germline2_nurse,i_male_germline,i_nb1,i_SC,i_stem_cell/progenitor	germ line,interstitial	i_female_germline,i_male_germline,i_nb,i_SC,i_stem_cell_progenitor	body
t6539aep	t6539aep|SPS1_DROME	PF02769.22;PF00586.24	AIRS_C;AIRS	O18373|SPS1_DROME Selenide, water dikinase OS=Drosophila melanogaster (Fruit fly)	2.61e-135	PREDICTED: selenide, water dikinase-like [Hydra vulgaris]	0	SPS1_DROME	FALSE	0.500086	1089	1	0.828426	0.171747	i_female_germline1,i_nb1,i_SC,i_stem_cell/progenitor	germ line,interstitial	i_female_germline,i_nb,i_SC,i_stem_cell_progenitor	body
t3731aep	t3731aep								FALSE	0.50004	1090	1	0	1.00008	i_neuron_en1,i_neuron_en2	endoderm	i_neuron_en	nerve net
t3139aep	t3139aep|ANTA_HYDVU	PF02822.14;PF00219.18	Antistasin;IGFBP	P38977|ANTA_HYDVU Antistasin OS=Hydra vulgaris (Hydra) (Hydra attenuata)	2.98e-12	PREDICTED: BPTI/Kunitz domain-containing protein 4-like [Hydra vulgaris]	8.04e-129	ANTA_HYDVU	FALSE	0.499631	1091	1	0.999262	0	ecEp_basal_disk,ecEp_stem_cell	ectoderm	ecEp_basal_disk,ecEp_stem_cell	foot,body
t22090aep	t22090aep					PREDICTED: putative leucine-rich repeat-containing protein DDB_G0290503 [Hydra vulgaris]	7.04e-105		FALSE	0.499321	1092	1	0.998641	0	ecEp_stem_cell	ectoderm	ecEp_stem_cell	body
t32739aep	t32739aep|CHM1B_CHICK	PF03357.21	Snf7	Q5ZKX1|CHM1B_CHICK Charged multivesicular body protein 1b OS=Gallus gallus (Chicken)	2.16e-70	PREDICTED: charged multivesicular body protein 1b-1-like [Hydra vulgaris]	1.89e-121	CHM1B_CHICK	FALSE	0.498611	1093	1	0.853268	0.143955	ecEp_battery_cell1(mp),ecEp_battery_cell2(mp)	ectoderm	ecEp_battery_cell	head
t5467aep	t5467aep					PREDICTED: uncharacterized protein LOC100209664 [Hydra vulgaris]	1.48e-75		FALSE	0.497524	1094	1	0.995047	0	i_neuron_ec1,i_neuron_ec3,i_neuron_ec4,i_neuron_en1,i_neuron_en2,i_neuron_en3,i_neuron_progenitor	ectoderm,endoderm,interstitial	i_neuron_ec,i_neuron_en,i_neuron_progenitor	nerve net,body
t38061aep	t38061aep|LGUL_MACFA	PF00903.25;PF13669.6	Glyoxalase;Glyoxalase_4	Q4R5F2|LGUL_MACFA Lactoylglutathione lyase OS=Macaca fascicularis (Crab-eating macaque) (Cynomolgus monkey)	8.8e-84	PREDICTED: lactoylglutathione lyase-like [Hydra vulgaris]	1.31e-124	LGUL_MACFA	FALSE	0.497356	1095	1	0.994713	0	i_female_germline1,i_neuron/gland_cell_progenitor	germ line,interstitial	i_female_germline,i_neuron_progenitor	body
t22350aep	t22350aep|ODPA_CAEEL	PF00676.20	E1_dh	P52899|ODPA_CAEEL Probable pyruvate dehydrogenase E1 component subunit alpha, mitochondrial OS=Caenorhabditis elegans	1.92e-140	PREDICTED: pyruvate dehydrogenase E1 component subunit alpha, mitochondrial-like [Hydra vulgaris]	0	ODPA_CAEEL	FALSE	0.497077	1096	1	0.870724	0.12343	ecEp_battery_cell1(mp),ecEp_battery_cell2(mp),ecEp_stem_cell	ectoderm	ecEp_battery_cell,ecEp_stem_cell	head,body
t10204aep	t10204aep|RENT1_HUMAN	PF09416.10;PF13087.6;PF13086.6;PF18141.1;PF13604.6;PF13245.6	UPF1_Zn_bind;AAA_12;AAA_11;DUF5599;AAA_30;AAA_19	Q92900|RENT1_HUMAN Regulator of nonsense transcripts 1 OS=Homo sapiens (Human)	0	PREDICTED: regulator of nonsense transcripts 1 [Hydra vulgaris]	0	RENT1_HUMAN	FALSE	0.494496	1098	1	0.940337	0.0486557	i_nb1,i_SC,i_stem_cell/progenitor	interstitial	i_nb,i_SC,i_stem_cell_progenitor	body
t16516aep	t16516aep|CBPD_LOPSP	PF00246.24	Peptidase_M14	P83852|CBPD_LOPSP Carboxypeptidase D OS=Lophonetta specularioides (Crested duck) (Anas specularioides)	8.15e-125	PREDICTED: carboxypeptidase D-like isoform X1 [Hydra vulgaris]	0	CBPD_LOPSP	FALSE	0.493171	1099	1	0.805547	0.180795	ecEp_battery_cell1(mp),ecEp_battery_cell2(mp)	ectoderm	ecEp_battery_cell	head
t853aep	t853aep								FALSE	0.492746	1100	1	0.985493	0	ecEp_battery_cell1(mp),ecEp_battery_cell2(mp),ecEp_head,ecEp_stem_cell	ectoderm	ecEp_battery_cell,ecEp_head,ecEp_stem_cell	head,body
t15516aep	t15516aep|PURA_AEDAE	PF00709.21	Adenylsucc_synt	Q17G75|PURA_AEDAE Adenylosuccinate synthetase {ECO:0000255|HAMAP-Rule:MF_03125} OS=Aedes aegypti (Yellowfever mosquito) (Culex aegypti)	0	PREDICTED: adenylosuccinate synthetase-like [Hydra vulgaris]	0	PURA_AEDAE	FALSE	0.491397	1101	1	0.80265	0.180144	enEp-nb(pd),enEp-nem(pd),enEp_foot,enEp_head,enEp_SC1,enEp_stem_cell	endoderm	enEp-nb,enEp-nem,enEp_foot,enEp_head,enEp_SC1,enEp_stem_cell	body,head,foot
t5260aep	t5260aep|OTUD4_MOUSE	PF02338.19	OTU	B2RRE7|OTUD4_MOUSE OTU domain-containing protein 4 {ECO:0000250|UniProtKB:Q01804} OS=Mus musculus (Mouse)	1.64e-62	PREDICTED: uncharacterized protein LOC100215194 [Hydra vulgaris] >gi|828213519|ref|XP_012559333.1| PREDICTED: uncharacterized protein LOC100215194 [Hydra vulgaris]	0	OTUD4_MOUSE	FALSE	0.491265	1102	1	0.948927	0.0336033	i_SC,i_stem_cell/progenitor	interstitial	i_SC,i_stem_cell_progenitor	body
t38377aep	t38377aep|BAFB_XENLA	PF02961.14	BAF	Q66KV4|BAFB_XENLA Barrier-to-autointegration factor B OS=Xenopus laevis (African clawed frog)	5.12e-45	PREDICTED: barrier-to-autointegration factor B-like [Hydra vulgaris]	8.1e-58	BAFB_XENLA	FALSE	0.49119	1103	1	0.98238	0	i_female_germline1,i_male_germline,i_nb1,i_nb2,i_neuron/gland_cell_progenitor,i_neuron_progenitor,i_stem_cell/progenitor	germ line,interstitial	i_female_germline,i_male_germline,i_nb,i_neuron_progenitor,i_stem_cell_progenitor	body
t776aep	t776aep|FACE1_HUMAN	PF16491.5;PF01435.18	Peptidase_M48_N;Peptidase_M48	O75844|FACE1_HUMAN CAAX prenyl protease 1 homolog OS=Homo sapiens (Human)	0	PREDICTED: CAAX prenyl protease 1 homolog [Hydra vulgaris]	0	FACE1_HUMAN	FALSE	0.490175	1104	1	0.904214	0.0761352	i_nb1,i_nb2,i_neuron/gland_cell_progenitor,i_SC,i_stem_cell/progenitor	interstitial	i_nb,i_neuron_progenitor,i_SC,i_stem_cell_progenitor	body
t18484aep	t18484aep	PF03879.14	Cgr1			PREDICTED: coiled-coil domain-containing protein 86-like [Hydra vulgaris]	7.18e-48		FALSE	0.489872	1105	1	0.979744	0	i_nb1,i_neuron/gland_cell_progenitor,i_neuron_progenitor,i_stem_cell/progenitor	interstitial	i_nb,i_neuron_progenitor,i_stem_cell_progenitor	body
t18886aep	t18886aep					PREDICTED: uncharacterized protein LOC100200555 [Hydra vulgaris]	5.16e-109		FALSE	0.489463	1106	2	0.620338	0.358589	ecEp_battery_cell1(mp),enEp_head,enEp_tent-nem(pd),enEp_tentacle,i_neuron_ec2	ectoderm,endoderm	ecEp_battery_cell,enEp_head,enEp_tent-nem,enEp_tentacle,i_neuron_ec	head,nerve net
t24310aep	t24310aep					PREDICTED: glycine-rich RNA-binding, abscisic acid-inducible protein-like [Hydra vulgaris]	8.68e-45		FALSE	0.489426	1107.5	1	0.978853	0	i_nb3	interstitial	i_nb	body
t32641aep	t32641aep	PF09446.10	VMA21			PREDICTED: uncharacterized protein LOC101240463 [Hydra vulgaris]	1.75e-47		FALSE	0.489426	1107.5	1	0.978853	0	i_female_germline1,i_female_germline2_nurse	germ line	i_female_germline	body
t435aep	t435aep|CHIT1_HUMAN	PF00704.28	Glyco_hydro_18	Q13231|CHIT1_HUMAN Chitotriosidase-1 OS=Homo sapiens (Human)	8.91e-97	PREDICTED: acidic mammalian chitinase-like [Hydra vulgaris]	0	CHIT1_HUMAN	FALSE	0.488938	1110	1	0.977877	0	ecEp_battery_cell1(mp),ecEp_battery_cell2(mp),enEp-nb(pd),enEp-nem(pd),enEp_foot,enEp_head,enEp_SC1,enEp_stem_cell,enEp_tent-nem(pd),enEp_tentacle	ectoderm,endoderm	ecEp_battery_cell,enEp-nb,enEp-nem,enEp_foot,enEp_head,enEp_SC1,enEp_stem_cell,enEp_tent-nem,enEp_tentacle	head,body,foot
t27670aep	t27670aep|DYSF_HUMAN	PF00168.30;PF08150.12;PF16165.5;PF08165.11;PF08151.12	C2;FerB;Ferlin_C;FerA;FerI	O75923|DYSF_HUMAN Dysferlin OS=Homo sapiens (Human)	0	PREDICTED: myoferlin [Hydra vulgaris]	0	DYSF_HUMAN	FALSE	0.487964	1113	1	0.945991	0.0299372	ecEp_basal_disk,ecEp_battery_cell1(mp),ecEp_battery_cell2(mp),ecEp_head,ecEp_stem_cell,enEp_head,i_female_germline2_nurse	ectoderm,endoderm,germ line	ecEp_basal_disk,ecEp_battery_cell,ecEp_head,ecEp_stem_cell,enEp_head,i_female_germline	foot,head,body
t16848aep	t16848aep|MPPB_BOVIN	PF00675.20;PF05193.21	Peptidase_M16;Peptidase_M16_C	Q3SZ71|MPPB_BOVIN Mitochondrial-processing peptidase subunit beta OS=Bos taurus (Bovine)	0	PREDICTED: mitochondrial-processing peptidase subunit beta-like [Hydra vulgaris]	0	MPPB_BOVIN	FALSE	0.487713	1115	1	0.916649	0.0587778	ecEp_head	ectoderm	ecEp_head	head
t15679aep	t15679aep|LC7L3_PONAB	PF03194.15	LUC7	Q5R8W6|LC7L3_PONAB Luc7-like protein 3 OS=Pongo abelii (Sumatran orangutan) (Pongo pygmaeus abelii)	2.74e-93	PREDICTED: luc7-like protein 3, partial [Hydra vulgaris]	5.81e-117	LC7L3_PONAB	FALSE	0.487052	1116	1	0.974103	0	i_female_germline1,i_male_germline,i_nb1,i_SC,i_stem_cell/progenitor	germ line,interstitial	i_female_germline,i_male_germline,i_nb,i_SC,i_stem_cell_progenitor	body
t23162aep	t23162aep					PREDICTED: uncharacterized protein LOC100200457 [Hydra vulgaris] >gi|828196414|ref|XP_012553523.1| PREDICTED: uncharacterized protein LOC100200457 [Hydra vulgaris]	4.44e-156		FALSE	0.486449	1117	1	0.815587	0.157312	ecEp_basal_disk,ecEp_battery_cell1(mp),ecEp_battery_cell2(mp),ecEp_head,ecEp_stem_cell	ectoderm	ecEp_basal_disk,ecEp_battery_cell,ecEp_head,ecEp_stem_cell	foot,head,body
t8235aep	t8235aep|GAPR1_HUMAN	PF00188.26	CAP	Q9H4G4|GAPR1_HUMAN Golgi-associated plant pathogenesis-related protein 1 OS=Homo sapiens (Human)	2.41e-22	PREDICTED: golgi-associated plant pathogenesis-related protein 1-like [Hydra vulgaris]	1.69e-159	GAPR1_HUMAN	FALSE	0.48625	1118	1	0.972501	0	ecEp_head,i_spumous_mucous_gland_cell	ectoderm,interstitial	ecEp_head,i_gland_cell	head
t15944aep	t15944aep|DKC1_MOUSE	PF08068.12;PF16198.5;PF01509.18;PF01472.20	DKCLD;TruB_C_2;TruB_N;PUA	Q9ESX5|DKC1_MOUSE H/ACA ribonucleoprotein complex subunit 4 OS=Mus musculus (Mouse)	0	PREDICTED: H/ACA ribonucleoprotein complex subunit 4-like [Hydra vulgaris]	0	DKC1_MOUSE	FALSE	0.486002	1119	1	0.913433	0.0585713	i_female_germline1,i_nb1,i_nb2,i_neuron/gland_cell_progenitor,i_stem_cell/progenitor	germ line,interstitial	i_female_germline,i_nb,i_neuron_progenitor,i_stem_cell_progenitor	body
t6455aep	t6455aep|AIMP2_CRIGR	PF18569.1	Thioredoxin_16	Q9WVM7|AIMP2_CRIGR Aminoacyl tRNA synthase complex-interacting multifunctional protein 2 OS=Cricetulus griseus (Chinese hamster) (Cricetulus barabensis griseus)	5.7e-19	PREDICTED: aminoacyl tRNA synthase complex-interacting multifunctional protein 2-like [Hydra vulgaris]	0	AIMP2_CRIGR	FALSE	0.485427	1122	1	0.879656	0.0911971	ecEp_battery_cell1(mp),ecEp_battery_cell2(mp),ecEp_head,enEp_tent-nem(pd),enEp_tentacle	ectoderm,endoderm	ecEp_battery_cell,ecEp_head,enEp_tent-nem,enEp_tentacle	head
t19309aep	t19309aep|GCSH_SCHPO	PF01597.19	GCV_H	Q9HDV9|GCSH_SCHPO Putative glycine cleavage system H protein, mitochondrial OS=Schizosaccharomyces pombe (strain 972 / ATCC 24843) (Fission yeast)	3.11e-36	PREDICTED: putative glycine cleavage system H protein, mitochondrial [Hydra vulgaris]	2.44e-103	GCSH_SCHPO	FALSE	0.483419	1125	1	0.81051	0.156328	enEp-nem(pd),enEp_head,enEp_SC1,enEp_stem_cell	endoderm	enEp-nem,enEp_head,enEp_SC1,enEp_stem_cell	head,body
t19430aep	t19430aep|RAP1_CAEEL	PF00071.22;PF08477.13;PF00025.21	Ras;Roc;Arf	Q18246|RAP1_CAEEL Ras-related protein Rap-1 OS=Caenorhabditis elegans	9.64e-98	PREDICTED: ras-related protein Rap-1b-like [Hydra vulgaris]	1.77e-118	RAP1_CAEEL	FALSE	0.483141	1126	1	0.776085	0.190197	ecEp_basal_disk,ecEp_battery_cell1(mp),ecEp_battery_cell2(mp),i_neuron_progenitor	ectoderm,interstitial	ecEp_basal_disk,ecEp_battery_cell,i_neuron_progenitor	foot,head,body
t12018aep	t12018aep|NHP2_PONAB	PF01248.26	Ribosomal_L7Ae	Q5RC65|NHP2_PONAB H/ACA ribonucleoprotein complex subunit 2 OS=Pongo abelii (Sumatran orangutan) (Pongo pygmaeus abelii)	2.22e-34	PREDICTED: H/ACA ribonucleoprotein complex subunit 2-like protein [Hydra vulgaris]	3.03e-81	NHP2_PONAB	FALSE	0.479361	1132	1	0.958721	0	i_female_germline1,i_nb1,i_nb2,i_neuron/gland_cell_progenitor,i_stem_cell/progenitor	germ line,interstitial	i_female_germline,i_nb,i_neuron_progenitor,i_stem_cell_progenitor	body
t23175aep	t23175aep|SF01_MOUSE	PF16275.5;PF00013.29	SF1-HH;KH_1	Q64213|SF01_MOUSE Splicing factor 1 OS=Mus musculus (Mouse)	4.5e-102	PREDICTED: splicing factor 1-like [Hydra vulgaris]	0	SF01_MOUSE	FALSE	0.479241	1133	1	0.919797	0.0386843	i_female_germline1,i_nb1,i_stem_cell/progenitor	germ line,interstitial	i_female_germline,i_nb,i_stem_cell_progenitor	body
t10822aep	t10822aep|GLNA_PANAR	PF00120.24;PF03951.19	Gln-synt_C;Gln-synt_N	Q04831|GLNA_PANAR Glutamine synthetase OS=Panulirus argus (Caribbean spiny lobster) (Palinurus argus)	1.68e-180	PREDICTED: glutamine synthetase-like isoform X1 [Hydra vulgaris]	0	GLNA_PANAR	FALSE	0.478575	1134	2	0.67796	0.279191	ecEp_battery_cell1(mp),ecEp_battery_cell2(mp),enEp_tent-nem(pd),enEp_tentacle	ectoderm,endoderm	ecEp_battery_cell,enEp_tent-nem,enEp_tentacle	head
t12066aep	t12066aep|FERM2_MOUSE	PF00373.18;PF18124.1;PF00169.29	FERM_M;Kindlin_2_N;PH	Q8CIB5|FERM2_MOUSE Fermitin family homolog 2 OS=Mus musculus (Mouse)	2.49e-176	PREDICTED: fermitin family homolog 2-like [Hydra vulgaris]	0	FERM2_MOUSE	FALSE	0.478497	1135	1	0.781642	0.175352	ecEp_basal_disk,ecEp_battery_cell1(mp),ecEp_battery_cell2(mp),ecEp_head,ecEp_stem_cell,enEp_tent-nem(pd),enEp_tentacle,i_female_germline2_nurse	ectoderm,endoderm,germ line	ecEp_basal_disk,ecEp_battery_cell,ecEp_head,ecEp_stem_cell,enEp_tent-nem,enEp_tentacle,i_female_germline	foot,head,body
t11551aep	t11551aep	PF15264.6	TSSC4			PREDICTED: protein TSSC4-like [Hydra vulgaris]	2.21e-139		FALSE	0.477735	1138	1	0.955471	0	i_female_germline1	germ line	i_female_germline	body
t28970aep	t28970aep|PSME3_CHICK	PF02252.18;PF02251.18	PA28_beta;PA28_alpha	Q5F3J5|PSME3_CHICK Proteasome activator complex subunit 3 OS=Gallus gallus (Chicken)	1.49e-55	PREDICTED: proteasome activator complex subunit 3-like [Acropora digitifera]	1.11e-61	PSME3_CHICK	FALSE	0.476731	1141	1	0.82918	0.124282	i_female_germline1,i_male_germline,i_nb1,i_neuron/gland_cell_progenitor,i_neuron_progenitor,i_SC,i_stem_cell/progenitor	germ line,interstitial	i_female_germline,i_male_germline,i_nb,i_neuron_progenitor,i_SC,i_stem_cell_progenitor	body
t21570aep	t21570aep|TI13B_XENLA	PF02953.15	zf-Tim10_DDP	Q8AVK1|TI13B_XENLA Mitochondrial import inner membrane translocase subunit Tim13-B OS=Xenopus laevis (African clawed frog)	1.59e-33	PREDICTED: mitochondrial import inner membrane translocase subunit Tim13-B-like [Hydra vulgaris] >gi|449670270|ref|XP_004207235.1| PREDICTED: mitochondrial import inner membrane translocase subunit Tim13-B-like [Hydra vulgaris] >gi|828201665|ref|XP_012555336.1| PREDICTED: mitochondrial import inner membrane translocase subunit Tim13-B-like [Hydra vulgaris] >gi|828201667|ref|XP_012555337.1| PREDIC…	3.03e-49	TI13B_XENLA	FALSE	0.475926	1142	1	0.776937	0.174916	i_female_germline1,i_nb1,i_neuron/gland_cell_progenitor,i_stem_cell/progenitor	germ line,interstitial	i_female_germline,i_nb,i_neuron_progenitor,i_stem_cell_progenitor	body
t15700aep	t15700aep|PPD_STRHY	PF02775.21;PF02776.18	TPP_enzyme_C;TPP_enzyme_N	Q54271|PPD_STRHY Phosphonopyruvate decarboxylase OS=Streptomyces hygroscopicus	2.8e-47	PREDICTED: uncharacterized protein LOC100197891 isoform X1 [Hydra vulgaris] >gi|828206906|ref|XP_012557104.1| PREDICTED: uncharacterized protein LOC100197891 isoform X2 [Hydra vulgaris]	0	PPD_STRHY	FALSE	0.475841	1143	1	0.88543	0.066252	enEp_SC1,enEp_stem_cell	endoderm	enEp_SC1,enEp_stem_cell	body
t1649aep	t1649aep|SF3A1_HUMAN	PF12230.8;PF01805.20;PF00240.23	PRP21_like_P;Surp;ubiquitin	Q15459|SF3A1_HUMAN Splicing factor 3A subunit 1 OS=Homo sapiens (Human)	5.2e-108	PREDICTED: splicing factor 3A subunit 1-like [Hydra vulgaris]	0	SF3A1_HUMAN	FALSE	0.475524	1144	1	0.911476	0.0395719	i_female_germline1,i_female_germline2_nurse,i_nb1,i_nb2,i_neuron/gland_cell_progenitor,i_stem_cell/progenitor	germ line,interstitial	i_female_germline,i_nb,i_neuron_progenitor,i_stem_cell_progenitor	body
t15174aep	t15174aep|RAB5C_CANLF	PF00071.22;PF08477.13;PF00025.21	Ras;Roc;Arf	P51147|RAB5C_CANLF Ras-related protein Rab-5C OS=Canis lupus familiaris (Dog) (Canis familiaris)	9.52e-114	PREDICTED: ras-related protein Rab-5C-like [Hydra vulgaris]	6.95e-154	RAB5C_CANLF	FALSE	0.475226	1145	2	0.695024	0.255428	ecEp_battery_cell1(mp),enEp-nem(pd),enEp_foot,enEp_head,enEp_SC1,enEp_stem_cell,enEp_tent-nem(pd),enEp_tentacle	ectoderm,endoderm	ecEp_battery_cell,enEp-nem,enEp_foot,enEp_head,enEp_SC1,enEp_stem_cell,enEp_tent-nem,enEp_tentacle	head,foot,body
t15590aep	t15590aep|MYCBP_DICDI			Q54I57|MYCBP_DICDI C-Myc-binding protein homolog OS=Dictyostelium discoideum (Slime mold)	3.2e-14	PREDICTED: C-Myc-binding protein homolog [Hydra vulgaris]	2.5e-53	MYCBP_DICDI	FALSE	0.474888	1147	1	0.949776	0	ecEp_battery_cell2(mp),enEp_tent-nem(pd),i_nematocyte	ectoderm,endoderm,interstitial	ecEp_battery_cell,enEp_tent-nem,i_nematocyte	head
t7513aep	t7513aep								FALSE	0.474084	1148	2	0.654209	0.293959	enEp-nb(pd),enEp-nem(pd),enEp_foot,enEp_head,enEp_SC1,enEp_stem_cell,enEp_tent-nem(pd),enEp_tentacle	endoderm	enEp-nb,enEp-nem,enEp_foot,enEp_head,enEp_SC1,enEp_stem_cell,enEp_tent-nem,enEp_tentacle	body,head,foot
t22820aep	t22820aep|PIN4_DANRE	PF13616.6;PF00639.21	Rotamase_3;Rotamase	Q503Y7|PIN4_DANRE Peptidyl-prolyl cis-trans isomerase NIMA-interacting 4 OS=Danio rerio (Zebrafish) (Brachydanio rerio)	7.72e-53	PREDICTED: peptidyl-prolyl cis-trans isomerase NIMA-interacting 4-like [Hydra vulgaris]	3.07e-65	PIN4_DANRE	FALSE	0.473971	1149	2	0.652767	0.295176	i_female_germline1,i_neuron/gland_cell_progenitor,i_SC,i_stem_cell/progenitor	germ line,interstitial	i_female_germline,i_neuron_progenitor,i_SC,i_stem_cell_progenitor	body
t12887aep	t12887aep					PREDICTED: protein phosphatase 1 regulatory subunit 12A-like [Hydra vulgaris] >gi|828197998|ref|XP_012554085.1| PREDICTED: protein phosphatase 1 regulatory subunit 12A-like [Hydra vulgaris]	0		FALSE	0.473166	1151	1	0.793598	0.152735	ecEp_battery_cell1(mp),ecEp_battery_cell2(mp),ecEp_head,ecEp_stem_cell	ectoderm	ecEp_battery_cell,ecEp_head,ecEp_stem_cell	head,body
t14236aep	t14236aep|NOP16_TETNG	PF09420.10	Nop16	Q9CPT5|NOP16_MOUSE Nucleolar protein 16 OS=Mus musculus (Mouse)	1.6e-14	PREDICTED: nucleolar protein 16-like [Hydra vulgaris]	1.79e-122	NOP16_TETNG	FALSE	0.473116	1152	1	0.946231	0	i_nb1,i_neuron/gland_cell_progenitor,i_neuron_progenitor,i_stem_cell/progenitor	interstitial	i_nb,i_neuron_progenitor,i_stem_cell_progenitor	body
t5953aep	t5953aep|NCS1_PONAB	PF13499.6;PF13405.6;PF00036.32;PF13202.6;PF13833.6	EF-hand_7;EF-hand_6;EF-hand_1;EF-hand_5;EF-hand_8	P62168|NCS1_RAT Neuronal calcium sensor 1 OS=Rattus norvegicus (Rat)	8.83e-81	predicted protein [Nematostella vectensis] >gi|156211647|gb|EDO32744.1| predicted protein [Nematostella vectensis]	1.02e-103	NCS1_PONAB	FALSE	0.470521	1154	1	0.941041	0	ecEp_battery_cell1(mp),ecEp_head,ecEp_stem_cell	ectoderm	ecEp_battery_cell,ecEp_head,ecEp_stem_cell	head,body
t34595aep	t34595aep|NDK_CHICK	PF00334.19	NDK	O57535|NDK_CHICK Nucleoside diphosphate kinase OS=Gallus gallus (Chicken)	5.74e-68	PREDICTED: nucleoside diphosphate kinase A-like [Hydra vulgaris]	2.67e-161	NDK_CHICK	FALSE	0.470239	1155	1	0.788426	0.152051	enEp-nb(pd),enEp-nem(pd),enEp_foot,enEp_head,enEp_SC1,enEp_stem_cell,i_female_germline2_nurse	endoderm,germ line	enEp-nb,enEp-nem,enEp_foot,enEp_head,enEp_SC1,enEp_stem_cell,i_female_germline	body,head,foot
t1085aep	t1085aep|DHX15_PONAB	PF04408.23;PF07717.16;PF00271.31	HA2;OB_NTP_bind;Helicase_C	Q5RAZ4|DHX15_PONAB Pre-mRNA-splicing factor ATP-dependent RNA helicase DHX15 {ECO:0000250|UniProtKB:O43143} OS=Pongo abelii (Sumatran orangutan) (Pongo pygmaeus abelii)	0	PREDICTED: putative pre-mRNA-splicing factor ATP-dependent RNA helicase PRP1 [Hydra vulgaris]	0	DHX15_PONAB	FALSE	0.469403	1157	1	0.899743	0.039062	i_nb1,i_stem_cell/progenitor	interstitial	i_nb,i_stem_cell_progenitor	body
t20205aep	t20205aep|PSA3_BOVIN	PF00227.26;PF10584.9	Proteasome;Proteasome_A_N	Q58DU5|PSA3_BOVIN Proteasome subunit alpha type-3 OS=Bos taurus (Bovine)	8.48e-121	PREDICTED: proteasome subunit alpha type-3-like [Hydra vulgaris]	3.89e-176	PSA3_BOVIN	FALSE	0.469114	1158	2	0.721914	0.216314	i_male_germline,i_nb1,i_neuron/gland_cell_progenitor,i_neuron_en2,i_SC,i_stem_cell/progenitor	germ line,interstitial,endoderm	i_male_germline,i_nb,i_neuron_progenitor,i_neuron_en,i_SC,i_stem_cell_progenitor	body,nerve net
t26986aep	t26986aep					PREDICTED: uncharacterized protein LOC100205981, partial [Hydra vulgaris]	3.72e-66		FALSE	0.468796	1159	1	0.937592	0	ecEp_basal_disk	ectoderm	ecEp_basal_disk	foot
t4973aep	t4973aep|MED22_DANRE	PF06179.12	Med22	A5WUL3|MED22_DANRE Mediator of RNA polymerase II transcription subunit 22 OS=Danio rerio (Zebrafish) (Brachydanio rerio)	2.69e-40	PREDICTED: mediator of RNA polymerase II transcription subunit 22-like [Hydra vulgaris]	3.02e-76	MED22_DANRE	FALSE	0.46793	1161	1	0.93586	0	i_neuron/gland_cell_progenitor	interstitial	i_neuron_progenitor	body
t24621aep	t24621aep|IF4B_MOUSE	PF00076.22	RRM_1	Q8BGD9|IF4B_MOUSE Eukaryotic translation initiation factor 4B OS=Mus musculus (Mouse)	3.73e-30	PREDICTED: eukaryotic translation initiation factor 4B-like [Hydra vulgaris]	0	IF4B_MOUSE	FALSE	0.46667	1162	1	0.883766	0.0495732	i_female_germline1,i_female_germline2_nurse,i_nb1,i_nb2,i_SC,i_stem_cell/progenitor	germ line,interstitial	i_female_germline,i_nb,i_SC,i_stem_cell_progenitor	body
t8455aep	t8455aep|SNX2_HUMAN	PF09325.10;PF00787.24;PF10456.9	Vps5;PX;BAR_3_WASP_bdg	O60749|SNX2_HUMAN Sorting nexin-2 OS=Homo sapiens (Human)	3.5e-136	PREDICTED: uncharacterized protein LOC100214782 [Hydra vulgaris]	0	SNX2_HUMAN	FALSE	0.46648	1163	1	0.805358	0.127602	enEp-nem(pd),enEp_foot,enEp_head,enEp_SC1,enEp_stem_cell,i_female_germline2_nurse	endoderm,germ line	enEp-nem,enEp_foot,enEp_head,enEp_SC1,enEp_stem_cell,i_female_germline	head,foot,body
t20663aep	t20663aep|LA_RAT	PF08777.11;PF05383.17	RRM_3;La	P38656|LA_RAT Lupus La protein homolog OS=Rattus norvegicus (Rat)	8.07e-55	PREDICTED: lupus La protein homolog A-like [Hydra vulgaris]	0	LA_RAT	FALSE	0.465454	1165	1	0.854189	0.0767191	i_female_germline1,i_female_germline2_nurse,i_nb1,i_neuron/gland_cell_progenitor,i_stem_cell/progenitor	germ line,interstitial	i_female_germline,i_nb,i_neuron_progenitor,i_stem_cell_progenitor	body
t10201aep	t10201aep|VATA2_DROME	PF00006.25;PF16886.5;PF02874.23	ATP-synt_ab;ATP-synt_ab_Xtn;ATP-synt_ab_N	Q27331|VATA2_DROME V-type proton ATPase catalytic subunit A isoform 2 OS=Drosophila melanogaster (Fruit fly)	0	PREDICTED: V-type proton ATPase catalytic subunit A isoform 2-like isoform X1 [Hydra vulgaris]	0	VATA2_DROME	FALSE	0.464537	1166	1	0.831713	0.0973613	ecEp_head,i_female_germline2_nurse	ectoderm,germ line	ecEp_head,i_female_germline	head,body
t6590aep	t6590aep|6PGD_HUMAN	PF00393.19;PF03446.15	6PGD;NAD_binding_2	P52209|6PGD_HUMAN 6-phosphogluconate dehydrogenase, decarboxylating OS=Homo sapiens (Human)	0	PREDICTED: 6-phosphogluconate dehydrogenase, decarboxylating [Hydra vulgaris]	0	6PGD_HUMAN	FALSE	0.46441	1167	1	0.801785	0.127035	ecEp_battery_cell1(mp),i_female_germline2_nurse,i_male_germline	ectoderm,germ line	ecEp_battery_cell,i_female_germline,i_male_germline	head,body
t9493aep	t9493aep|PNPH_BOVIN	PF01048.20	PNP_UDP_1	P55859|PNPH_BOVIN Purine nucleoside phosphorylase OS=Bos taurus (Bovine)	1.2e-98	PREDICTED: purine nucleoside phosphorylase-like [Kryptolebias marmoratus]	8.12e-116	PNPH_BOVIN	FALSE	0.464158	1169	1	0.731184	0.197131	enEp-nb(pd),enEp-nem(pd),enEp_foot,enEp_head,enEp_SC1,enEp_stem_cell,enEp_tentacle,i_female_germline2_nurse	endoderm,germ line	enEp-nb,enEp-nem,enEp_foot,enEp_head,enEp_SC1,enEp_stem_cell,enEp_tentacle,i_female_germline	body,head,foot
t7001aep	t7001aep|VINEX_HUMAN	PF14604.6;PF00018.28;PF07653.17;PF00595.24	SH3_9;SH3_1;SH3_2;PDZ	O60504|VINEX_HUMAN Vinexin OS=Homo sapiens (Human)	1.87e-27	PREDICTED: uncharacterized protein C19C2.10-like [Hydra vulgaris]	0	VINEX_HUMAN	FALSE	0.463927	1170	1	0.834303	0.0935507	ecEp_basal_disk,ecEp_battery_cell1(mp),ecEp_battery_cell2(mp),ecEp_head,ecEp_stem_cell,enEp_tent-nem(pd),enEp_tentacle	ectoderm,endoderm	ecEp_basal_disk,ecEp_battery_cell,ecEp_head,ecEp_stem_cell,enEp_tent-nem,enEp_tentacle	foot,head,body
t24467aep	t24467aep|LMNB2_CHICK	PF00038.21;PF00932.19	Filament;LTD	P14732|LMNB2_CHICK Lamin-B2 OS=Gallus gallus (Chicken)	3.67e-83	prelamin-A/C-like [Hydra vulgaris] >gi|4886319|emb|CAB43346.1| lamin [Hydra vulgaris]	0	LMNB2_CHICK	FALSE	0.462641	1173	1	0.925281	0	ecEp_head,ecEp_stem_cell,i_female_germline1,i_female_germline2_nurse,i_neuron/gland_cell_progenitor,i_neuron_progenitor	ectoderm,germ line,interstitial	ecEp_head,ecEp_stem_cell,i_female_germline,i_neuron_progenitor	head,body
t24258aep	t24258aep|PUM2_HUMAN	PF00806.19	PUF	Q8TB72|PUM2_HUMAN Pumilio homolog 2 OS=Homo sapiens (Human)	0	PREDICTED: pumilio homolog 2-like isoform X1 [Hydra vulgaris] >gi|828218298|ref|XP_012560920.1| PREDICTED: pumilio homolog 2-like isoform X1 [Hydra vulgaris]	0	PUM2_HUMAN	FALSE	0.462415	1174	1	0.878485	0.0463451	i_female_germline1,i_female_germline2_nurse,i_nb1	germ line,interstitial	i_female_germline,i_nb	body
t5792aep	t5792aep|KLF11_HUMAN	PF00096.26;PF13465.6;PF13894.6	zf-C2H2;zf-H2C2_2;zf-C2H2_4	O14901|KLF11_HUMAN Krueppel-like factor 11 OS=Homo sapiens (Human)	1.22e-51	transcription factor KLF11 [Hydra vulgaris]	0	KLF11_HUMAN	FALSE	0.462298	1175	1	0.837754	0.0868427	ecEp_battery_cell1(mp),ecEp_battery_cell2(mp),enEp_tentacle,i_female_germline2_nurse,i_neuron_ec1,i_neuron_ec3	ectoderm,endoderm,germ line	ecEp_battery_cell,enEp_tentacle,i_female_germline,i_neuron_ec	head,body,nerve net
t9586aep	t9586aep|DLG2_DANRE	PF00595.24;PF00625.21;PF17820.1;PF13180.6;PF07653.17	PDZ;Guanylate_kin;PDZ_6;PDZ_2;SH3_2	Q5PYH7|DLG2_DANRE Disks large homolog 2 OS=Danio rerio (Zebrafish) (Brachydanio rerio)	0	PREDICTED: disks large homolog 1-like [Hydra vulgaris]	0	DLG2_DANRE	FALSE	0.461974	1177	1	0.82324	0.100708	ecEp_battery_cell1(mp),ecEp_battery_cell2(mp),ecEp_head	ectoderm	ecEp_battery_cell,ecEp_head	head
t12300aep	t12300aep								FALSE	0.461566	1178.5	1	0.923131	0	i_female_germline1,i_female_germline2_nurse,i_male_germline,i_nb1,i_neuron/gland_cell_progenitor,i_SC,i_stem_cell/progenitor	germ line,interstitial	i_female_germline,i_male_germline,i_nb,i_neuron_progenitor,i_SC,i_stem_cell_progenitor	body
t14092aep	t14092aep|PA2G4_RAT	PF00557.24	Peptidase_M24	Q6AYD3|PA2G4_RAT Proliferation-associated protein 2G4 OS=Rattus norvegicus (Rat)	4.93e-155	PREDICTED: proliferation-associated protein 2G4-like [Hydra vulgaris]	0	PA2G4_RAT	FALSE	0.459958	1183	1	0.805715	0.1142	i_female_germline1,i_female_germline2_nurse,i_nb1,i_nematocyte,i_neuron/gland_cell_progenitor,i_stem_cell/progenitor	germ line,interstitial	i_female_germline,i_nb,i_nematocyte,i_neuron_progenitor,i_stem_cell_progenitor	body,head
t26546aep	t26546aep					PREDICTED: trichohyalin-like [Hydra vulgaris]	3.06e-145		FALSE	0.459861	1184	1	0.919721	0	i_female_germline2_nurse	germ line	i_female_germline	body
t1688aep	t1688aep|CTNB_URECA	PF00514.23	Arm	P35224|CTNB_URECA Catenin beta OS=Urechis caupo (Innkeeper worm) (Spoonworm)	0	beta-catenin [Hydra vulgaris]	0	CTNB_URECA	FALSE	0.459514	1185	1	0.885002	0.0340262	ecEp_battery_cell1(mp),ecEp_battery_cell2(mp),i_neuron/gland_cell_progenitor	ectoderm,interstitial	ecEp_battery_cell,i_neuron_progenitor	head,body
t7297aep	t7297aep|CO4A2_ASCSU	PF00092.28;PF01391.18;PF13519.6;PF01413.19;PF00095.21	VWA;Collagen;VWA_2;C4;WAP	P27393|CO4A2_ASCSU Collagen alpha-2(IV) chain OS=Ascaris suum (Pig roundworm) (Ascaris lumbricoides)	9.17e-92	PREDICTED: LOW QUALITY PROTEIN: uncharacterized protein LOC100214647 [Hydra vulgaris]	0	CO4A2_ASCSU	FALSE	0.459406	1186	1	0.886305	0.0325069	enEp-nb(pd),enEp-nem(pd),enEp_foot,enEp_head,enEp_SC1,enEp_stem_cell,enEp_tent-nem(pd),enEp_tentacle	endoderm	enEp-nb,enEp-nem,enEp_foot,enEp_head,enEp_SC1,enEp_stem_cell,enEp_tent-nem,enEp_tentacle	body,head,foot
t6753aep	t6753aep|DAP1_RAT	PF15228.6	DAP	Q9QX67|DAP1_RAT Death-associated protein 1 OS=Rattus norvegicus (Rat)	1.25e-12	PREDICTED: death-associated protein 1-like [Hydra vulgaris]	2.45e-50	DAP1_RAT	FALSE	0.459132	1187	1	0.749544	0.168721	ecEp_basal_disk,i_female_germline1,i_female_germline2_nurse,i_nb1,i_nb2,i_nb3,i_spumous_mucous_gland_cell,i_stem_cell/progenitor	ectoderm,germ line,interstitial	ecEp_basal_disk,i_female_germline,i_nb,i_gland_cell,i_stem_cell_progenitor	foot,body,head
t27552aep	t27552aep|ZPR1_BOVIN	PF03367.13	zf-ZPR1	Q2TBX0|ZPR1_BOVIN Zinc finger protein ZPR1 OS=Bos taurus (Bovine)	1.27e-151	PREDICTED: zinc finger protein ZPR1-like [Hydra vulgaris]	0	ZPR1_BOVIN	FALSE	0.458753	1188	1	0.836957	0.0805492	ecEp_stem_cell,i_nb1,i_neuron/gland_cell_progenitor,i_SC,i_stem_cell/progenitor	ectoderm,interstitial	ecEp_stem_cell,i_nb,i_neuron_progenitor,i_SC,i_stem_cell_progenitor	body
t19015aep	t19015aep|YLPM1_RAT			P0CB49|YLPM1_RAT YLP motif-containing protein 1 OS=Rattus norvegicus (Rat)	2.64e-79	PREDICTED: YLP motif-containing protein 1-like isoform X2 [Hydra vulgaris]	0	YLPM1_RAT	FALSE	0.45835	1191	1	0.821446	0.0952538	i_nb1,i_SC,i_stem_cell/progenitor	interstitial	i_nb,i_SC,i_stem_cell_progenitor	body
t6569aep	t6569aep|ARFP1_HUMAN	PF06456.13	Arfaptin	P53367|ARFP1_HUMAN Arfaptin-1 OS=Homo sapiens (Human)	3.11e-78	PREDICTED: arfaptin-2-like isoform X1 [Hydra vulgaris]	0	ARFP1_HUMAN	FALSE	0.458263	1192	2	0.632521	0.284006	i_nb2,i_nb3	interstitial	i_nb	body
t9551aep	t9551aep|TM258_MOUSE	PF05251.12	Ost5	P61166|TM258_MOUSE Transmembrane protein 258 OS=Mus musculus (Mouse)	1.58e-29	PREDICTED: transmembrane protein 258-like [Hydra vulgaris]	8.56e-38	TM258_MOUSE	FALSE	0.457897	1193	1	0.915794	0	i_nb2,i_nb3	interstitial	i_nb	body
t28155aep	t28155aep	PF01391.18	Collagen			TPA_exp: minicollagen 9 [Hydra vulgaris]	1.23e-30		FALSE	0.457242	1196	1	0.914485	0	i_nb4	interstitial	i_nb	body
t64aep	t64aep|AP2S1_RAT	PF01217.20	Clat_adaptor_s	P62744|AP2S1_RAT AP-2 complex subunit sigma OS=Rattus norvegicus (Rat)	3.31e-87	PREDICTED: AP-2 complex subunit sigma [Hydra vulgaris] >gi|828192348|ref|XP_012559704.1| PREDICTED: AP-2 complex subunit sigma [Hydra vulgaris]	1.3e-96	AP2S1_RAT	FALSE	0.456806	1198	2	0.453965	0.459647	i_neuron_en1	endoderm	i_neuron_en	nerve net
t12600aep	t12600aep|STT3A_BOVIN	PF02516.14	STT3	Q2KJI2|STT3A_BOVIN Dolichyl-diphosphooligosaccharide--protein glycosyltransferase subunit STT3A OS=Bos taurus (Bovine)	0	PREDICTED: dolichyl-diphosphooligosaccharide--protein glycosyltransferase subunit STT3A-like [Hydra vulgaris]	0	STT3A_BOVIN	FALSE	0.45664	1199	1	0.91328	0	ecEp_basal_disk,i_female_germline2_nurse,i_nb2	ectoderm,germ line,interstitial	ecEp_basal_disk,i_female_germline,i_nb	foot,body
t7968aep	t7968aep|ETHE1_ARATH	PF00753.27	Lactamase_B	Q9C8L4|ETHE1_ARATH Persulfide dioxygenase ETHE1 homolog, mitochondrial OS=Arabidopsis thaliana (Mouse-ear cress)	6.79e-88	predicted protein [Nematostella vectensis] >gi|156221155|gb|EDO42013.1| predicted protein [Nematostella vectensis]	3.02e-106	ETHE1_ARATH	FALSE	0.456195	1200	1	0.912389	0	ecEp_battery_cell1(mp),ecEp_battery_cell2(mp),ecEp_head,enEp_tent-nem(pd),enEp_tentacle	ectoderm,endoderm	ecEp_battery_cell,ecEp_head,enEp_tent-nem,enEp_tentacle	head
t29831aep	t29831aep|PHB_RAT	PF01145.25	Band_7	P67779|PHB_RAT Prohibitin OS=Rattus norvegicus (Rat)	3.04e-141	PREDICTED: prohibitin-like [Hydra vulgaris]	0	PHB_RAT	FALSE	0.455407	1204	1	0.910814	0	i_female_germline1,i_nb1,i_neuron/gland_cell_progenitor,i_stem_cell/progenitor	germ line,interstitial	i_female_germline,i_nb,i_neuron_progenitor,i_stem_cell_progenitor	body
t752aep	t752aep|KAP1_HUMAN	PF00027.29;PF02197.17	cNMP_binding;RIIa	P31321|KAP1_HUMAN cAMP-dependent protein kinase type I-beta regulatory subunit OS=Homo sapiens (Human)	0	PREDICTED: cAMP-dependent protein kinase type I-beta regulatory subunit-like [Hydra vulgaris]	0	KAP1_HUMAN	FALSE	0.455012	1206	2	0.680746	0.229278	ecEp_basal_disk,ecEp_battery_cell1(mp),ecEp_battery_cell2(mp),i_neuron_ec4	ectoderm	ecEp_basal_disk,ecEp_battery_cell,i_neuron_ec	foot,head,nerve net
t33064aep	t33064aep					PREDICTED: uncharacterized protein LOC100209667 [Hydra vulgaris]	8.96e-129		FALSE	0.454479	1207	1	0.908957	0	ecEp_battery_cell2(mp),enEp-nem(pd),enEp_tent-nem(pd),i_nematocyte	ectoderm,endoderm,interstitial	ecEp_battery_cell,enEp-nem,enEp_tent-nem,i_nematocyte	head
t12704aep	t12704aep|PRS6A_HUMAN	PF00004.29;PF16450.5;PF17862.1	AAA;Prot_ATP_ID_OB;AAA_lid_3	P17980|PRS6A_HUMAN 26S protease regulatory subunit 6A OS=Homo sapiens (Human)	0	PREDICTED: LOW QUALITY PROTEIN: 26S protease regulatory subunit 6A-B-like [Hydra vulgaris]	0	PRS6A_HUMAN	FALSE	0.453645	1209	1	0.844133	0.0631567	i_neuron/gland_cell_progenitor	interstitial	i_neuron_progenitor	body
t9522aep	t9522aep|RPF2_HUMAN	PF04427.18	Brix	Q9H7B2|RPF2_HUMAN Ribosome production factor 2 homolog OS=Homo sapiens (Human)	2.84e-112	PREDICTED: ribosome production factor 2 homolog [Hydra vulgaris]	0	RPF2_HUMAN	FALSE	0.45346	1210	2	0.69784	0.20908	i_female_germline1,i_male_germline,i_nb1,i_neuron/gland_cell_progenitor,i_stem_cell/progenitor	germ line,interstitial	i_female_germline,i_male_germline,i_nb,i_neuron_progenitor,i_stem_cell_progenitor	body
t4967aep	t4967aep|PSA1_MOUSE	PF00227.26;PF10584.9	Proteasome;Proteasome_A_N	Q9R1P4|PSA1_MOUSE Proteasome subunit alpha type-1 OS=Mus musculus (Mouse)	1.78e-111	PREDICTED: proteasome subunit alpha type-1-like [Hydra vulgaris]	8.31e-178	PSA1_MOUSE	FALSE	0.453358	1211	1	0.906716	0	i_female_germline1,i_male_germline,i_nb1,i_neuron/gland_cell_progenitor,i_SC,i_stem_cell/progenitor	germ line,interstitial	i_female_germline,i_male_germline,i_nb,i_neuron_progenitor,i_SC,i_stem_cell_progenitor	body
t3544aep	t3544aep|RBM8A_SALSA	PF00076.22	RRM_1	B5DGI7|RBM8A_SALSA RNA-binding protein 8A OS=Salmo salar (Atlantic salmon)	1.75e-45	PREDICTED: RNA-binding protein 8A-like [Hydra vulgaris]	2.94e-90	RBM8A_SALSA	FALSE	0.451105	1216	1	0.756367	0.145844	i_female_germline1,i_nb1,i_nb2,i_neuron/gland_cell_progenitor,i_stem_cell/progenitor	germ line,interstitial	i_female_germline,i_nb,i_neuron_progenitor,i_stem_cell_progenitor	body
t3988aep	t3988aep|PINX1_MOUSE	PF01585.23;PF12656.7	G-patch;G-patch_2	Q9CZX5|PINX1_MOUSE PIN2/TERF1-interacting telomerase inhibitor 1 OS=Mus musculus (Mouse)	1.39e-38	PREDICTED: PIN2/TERF1-interacting telomerase inhibitor 1-like, partial [Hydra vulgaris]	0	PINX1_MOUSE	FALSE	0.45108	1217	1	0.902159	0	i_female_germline1,i_female_germline2_nurse	germ line	i_female_germline	body
t10569aep	t10569aep|TM189_HUMAN	PF10520.9	TMEM189_B_dmain	A5PLL7|TM189_HUMAN Transmembrane protein 189 OS=Homo sapiens (Human)	9.3e-82	PREDICTED: transmembrane protein 189-like [Hydra vulgaris]	0	TM189_HUMAN	FALSE	0.450969	1218	1	0.817228	0.08471	enEp_head,i_neuron_ec2	endoderm,ectoderm	enEp_head,i_neuron_ec	head,nerve net
t13671aep	t13671aep|GRK5_BOVIN	PF00069.25;PF07714.17;PF00615.19	Pkinase;Pkinase_Tyr;RGS	P43249|GRK5_BOVIN G protein-coupled receptor kinase 5 OS=Bos taurus (Bovine)	0	PREDICTED: G protein-coupled receptor kinase 5-like [Hydra vulgaris]	0	GRK5_BOVIN	FALSE	0.449837	1220	1	0.85539	0.0442843	ecEp_battery_cell1(mp),i_neuron_ec4	ectoderm	ecEp_battery_cell,i_neuron_ec	head,nerve net
t20802aep	t20802aep|SCAF8_HUMAN	PF04818.13;PF00076.22	CTD_bind;RRM_1	Q9UPN6|SCAF8_HUMAN Protein SCAF8 OS=Homo sapiens (Human)	6.49e-50	PREDICTED: splicing factor, arginine/serine-rich 15-like [Hydra vulgaris]	0	SCAF8_HUMAN	FALSE	0.449656	1221	1	0.876634	0.0226787	i_female_germline1,i_nb1,i_neuron/gland_cell_progenitor,i_stem_cell/progenitor	germ line,interstitial	i_female_germline,i_nb,i_neuron_progenitor,i_stem_cell_progenitor	body
t17750aep	t17750aep|YFBK_ECOLI	PF00092.28;PF13768.6;PF13519.6	VWA;VWA_3;VWA_2	P76481|YFBK_ECOLI Uncharacterized protein YfbK OS=Escherichia coli (strain K12)	9.6e-09	PREDICTED: uncharacterized protein LOC101238909, partial [Hydra vulgaris]	3.01e-136	YFBK_ECOLI	FALSE	0.449638	1222	1	0.700689	0.198588	ecEp_basal_disk,ecEp_battery_cell1(mp),ecEp_battery_cell2(mp),enEp-nem(pd),enEp_foot	ectoderm,endoderm	ecEp_basal_disk,ecEp_battery_cell,enEp-nem,enEp_foot	foot,head
t20308aep	t20308aep|MRT4_HUMAN	PF17777.1;PF00466.20	RL10P_insert;Ribosomal_L10	Q9UKD2|MRT4_HUMAN mRNA turnover protein 4 homolog {ECO:0000250|UniProtKB:P33201} OS=Homo sapiens (Human)	4.86e-84	PREDICTED: mRNA turnover protein 4 homolog [Hydra vulgaris]	6.69e-161	MRT4_HUMAN	FALSE	0.448463	1223	1	0.896926	0	i_female_germline1,i_nb1,i_neuron/gland_cell_progenitor,i_stem_cell/progenitor	germ line,interstitial	i_female_germline,i_nb,i_neuron_progenitor,i_stem_cell_progenitor	body
t8787aep	t8787aep|DDX21_HUMAN	PF00270.29;PF00271.31;PF08152.12;PF04851.15	DEAD;Helicase_C;GUCT;ResIII	Q9NR30|DDX21_HUMAN Nucleolar RNA helicase 2 {ECO:0000305} OS=Homo sapiens (Human)	1.77e-150	PREDICTED: nucleolar RNA helicase 2-like [Hydra vulgaris]	0	DDX21_HUMAN	FALSE	0.448093	1224	1	0.896185	0	i_female_germline1,i_nb1,i_neuron/gland_cell_progenitor,i_stem_cell/progenitor	germ line,interstitial	i_female_germline,i_nb,i_neuron_progenitor,i_stem_cell_progenitor	body
t14609aep	t14609aep|UK114_HUMAN	PF01042.21	Ribonuc_L-PSP	P52758|UK114_HUMAN Ribonuclease UK114 OS=Homo sapiens (Human)	2.9e-47	PREDICTED: ribonuclease UK114-like [Hydra vulgaris]	7.48e-90	UK114_HUMAN	FALSE	0.447759	1225	1	0.895517	0	i_female_germline1,i_male_germline,i_nb1,i_neuron/gland_cell_progenitor,i_SC,i_stem_cell/progenitor	germ line,interstitial	i_female_germline,i_male_germline,i_nb,i_neuron_progenitor,i_SC,i_stem_cell_progenitor	body
t5355aep	t5355aep|SH3K1_HUMAN	PF14604.6;PF00018.28;PF07653.17	SH3_9;SH3_1;SH3_2	Q96B97|SH3K1_HUMAN SH3 domain-containing kinase-binding protein 1 OS=Homo sapiens (Human)	9.23e-46	PREDICTED: SH3 domain-containing kinase-binding protein 1-like [Hydra vulgaris]	0	SH3K1_HUMAN	FALSE	0.447194	1226	1	0.894389	0	enEp-nem(pd),enEp_head,enEp_SC1,enEp_stem_cell,i_female_germline2_nurse	endoderm,germ line	enEp-nem,enEp_head,enEp_SC1,enEp_stem_cell,i_female_germline	head,body
t12079aep	t12079aep|CBPA2_RAT	PF00246.24;PF02244.16	Peptidase_M14;Propep_M14	P19222|CBPA2_RAT Carboxypeptidase A2 OS=Rattus norvegicus (Rat)	7.28e-81	PREDICTED: zinc carboxypeptidase-like [Hydra vulgaris]	0	CBPA2_RAT	FALSE	0.447014	1227	1	0.894029	0	i_granular_mucous_gland_cell,i_zymogen_gland_cell	interstitial	i_granular_mucous_gland_cell,i_gland_cell	head,body
t6758aep	t6758aep|CBR1_MACFA	PF00106.25;PF13561.6;PF01370.21;PF08659.10	adh_short;adh_short_C2;Epimerase;KR	Q8MI29|CBR1_MACFA Carbonyl reductase [NADPH] 1 OS=Macaca fascicularis (Crab-eating macaque) (Cynomolgus monkey)	1.62e-67	PREDICTED: carbonyl reductase [NADPH] 1-like [Hydra vulgaris]	0	CBR1_MACFA	FALSE	0.446844	1228	2	0.66836	0.225328	ecEp_stem_cell,i_female_germline1,i_female_germline2_nurse	ectoderm,germ line	ecEp_stem_cell,i_female_germline	body
t30826aep	t30826aep|OXIR_STRAT	PF00106.25;PF13561.6;PF08659.10	adh_short;adh_short_C2;KR	Q03326|OXIR_STRAT Probable oxidoreductase OS=Streptomyces antibioticus	7.67e-62	PREDICTED: short-chain dehydrogenase TIC 32, chloroplastic-like [Hydra vulgaris] >gi|221119753|ref|XP_002160408.1| PREDICTED: short-chain dehydrogenase TIC 32, chloroplastic-like [Hydra vulgaris] >gi|449688670|ref|XP_004211811.1| PREDICTED: short-chain dehydrogenase TIC 32, chloroplastic-like [Hydra vulgaris]	0	OXIR_STRAT	FALSE	0.446829	1229	2	0.687382	0.206277	ecEp_battery_cell1(mp),ecEp_battery_cell2(mp)	ectoderm	ecEp_battery_cell	head
t9574aep	t9574aep|ADAS_HUMAN	PF02913.19;PF01565.23	FAD-oxidase_C;FAD_binding_4	O00116|ADAS_HUMAN Alkyldihydroxyacetonephosphate synthase, peroxisomal OS=Homo sapiens (Human)	0	PREDICTED: alkyldihydroxyacetonephosphate synthase, peroxisomal-like [Hydra vulgaris]	0	ADAS_HUMAN	FALSE	0.446648	1230	1	0.777038	0.116258	enEp_foot,enEp_SC1,enEp_stem_cell	endoderm	enEp_foot,enEp_SC1,enEp_stem_cell	foot,body
t2536aep	t2536aep|NOG2_MOUSE	PF08153.12;PF01926.23;PF12631.7	NGP1NT;MMR_HSR1;MnmE_helical	Q99LH1|NOG2_MOUSE Nucleolar GTP-binding protein 2 OS=Mus musculus (Mouse)	0	PREDICTED: nucleolar GTP-binding protein 2-like [Hydra vulgaris]	0	NOG2_MOUSE	FALSE	0.446456	1231	1	0.795551	0.0973613	i_nb1,i_neuron/gland_cell_progenitor,i_SC,i_stem_cell/progenitor	interstitial	i_nb,i_neuron_progenitor,i_SC,i_stem_cell_progenitor	body
t4168aep	t4168aep|COPG2_DANRE	PF01602.20;PF08752.10;PF16381.5;PF13646.6;PF12717.7	Adaptin_N;COP-gamma_platf;Coatomer_g_Cpla;HEAT_2;Cnd1	Q9PUE4|COPG2_DANRE Coatomer subunit gamma-2 OS=Danio rerio (Zebrafish) (Brachydanio rerio)	0	PREDICTED: coatomer subunit gamma-2-like [Hydra vulgaris]	0	COPG2_DANRE	FALSE	0.44628	1232	1	0.821257	0.0713024	i_female_germline2_nurse	germ line	i_female_germline	body
t30603aep	t30603aep|HH_DROVI	PF01085.18	HH_signal	B4LZT9|HH_DROVI Protein hedgehog {ECO:0000250|UniProtKB:Q02936} OS=Drosophila virilis (Fruit fly)	4.98e-08	PREDICTED: collagen alpha-4(VI) chain-like, partial [Hydra vulgaris]	1.9e-70	HH_DROVI	FALSE	0.446049	1234	1	0.892098	0	enEp_SC1,enEp_stem_cell	endoderm	enEp_SC1,enEp_stem_cell	body
t22373aep	t22373aep|AATM_RAT	PF00155.21	Aminotran_1_2	P00507|AATM_RAT Aspartate aminotransferase, mitochondrial OS=Rattus norvegicus (Rat)	0	PREDICTED: aspartate aminotransferase, mitochondrial-like [Hydra vulgaris]	0	AATM_RAT	FALSE	0.445497	1236	2	0.666517	0.224476	i_female_germline1,i_female_germline2_nurse,i_nb1,i_SC,i_stem_cell/progenitor	germ line,interstitial	i_female_germline,i_nb,i_SC,i_stem_cell_progenitor	body
t790aep	t790aep|DDX3X_HUMAN	PF00270.29;PF00271.31	DEAD;Helicase_C	O00571|DDX3X_HUMAN ATP-dependent RNA helicase DDX3X OS=Homo sapiens (Human)	0	PREDICTED: putative ATP-dependent RNA helicase Pl10 [Hydra vulgaris]	0	DDX3X_HUMAN	FALSE	0.445275	1237	1	0.855657	0.0348927	i_female_germline2_nurse,i_male_germline	germ line	i_female_germline,i_male_germline	body
t26969aep	t26969aep|TM55B_MACFA	PF09788.9	Tmemb_55A	Q4R6W2|TM55B_MACFA Type 1 phosphatidylinositol 4,5-bisphosphate 4-phosphatase OS=Macaca fascicularis (Crab-eating macaque) (Cynomolgus monkey)	1.75e-46	PREDICTED: type 2 phosphatidylinositol 4,5-bisphosphate 4-phosphatase-like [Hydra vulgaris]	8.02e-158	TM55B_MACFA	FALSE	0.44491	1238	1	0.700879	0.18894	ecEp_battery_cell1(mp),ecEp_battery_cell2(mp),enEp_tent-nem(pd)	ectoderm,endoderm	ecEp_battery_cell,enEp_tent-nem	head
t17605aep	t17605aep|PP1B_XENTR	PF00149.28;PF16891.5	Metallophos;STPPase_N	Q5I085|PP1B_XENTR Serine/threonine-protein phosphatase PP1-beta catalytic subunit OS=Xenopus tropicalis (Western clawed frog) (Silurana tropicalis)	0	PREDICTED: serine/threonine-protein phosphatase PP1-beta catalytic subunit [Hydra vulgaris]	0	PP1B_XENTR	FALSE	0.444889	1239	1	0.690493	0.199284	ecEp_battery_cell1(mp),i_female_germline2_nurse,i_male_germline	ectoderm,germ line	ecEp_battery_cell,i_female_germline,i_male_germline	head,body
t3457aep	t3457aep								FALSE	0.443561	1242	1	0.887121	0	ecEp_battery_cell1(mp),ecEp_battery_cell2(mp)	ectoderm	ecEp_battery_cell	head
t7436aep	t7436aep|SLB2_DEIAC	PF00059.21	Lectin_C	Q8AYA3|SLB2_DEIAC Snaclec agglucetin subunit beta-2 OS=Deinagkistrodon acutus (Hundred-pace snake) (Agkistrodon acutus)	1.7e-10	PREDICTED: uncharacterized protein LOC100202087 [Hydra vulgaris]	0	SLB2_DEIAC	FALSE	0.443218	1243	1	0.856121	0.0303142	i_nb2,i_nb3,i_nb4,i_nb5	interstitial	i_nb	body
t17835aep	t17835aep|MZB1_RAT	PF11938.8	DUF3456	Q561R0|MZB1_RAT Marginal zone B- and B1-cell-specific protein OS=Rattus norvegicus (Rat)	5.82e-31	predicted protein [Nematostella vectensis] >gi|156224633|gb|EDO45457.1| predicted protein [Nematostella vectensis]	7.84e-52	MZB1_RAT	FALSE	0.443034	1244	2	0.575354	0.310714	ecEp_battery_cell1(mp),enEp-nem(pd),enEp_foot,enEp_head,enEp_SC1,enEp_stem_cell,i_nematocyte	ectoderm,endoderm,interstitial	ecEp_battery_cell,enEp-nem,enEp_foot,enEp_head,enEp_SC1,enEp_stem_cell,i_nematocyte	head,foot,body
t16916aep	t16916aep|CCDCX_ANOGA	PF03915.13	AIP3	Q7PQ25|CCDCX_ANOGA Coiled-coil domain-containing protein AGAP005037 OS=Anopheles gambiae (African malaria mosquito)	2.44e-14	PREDICTED: coiled-coil domain-containing protein CG32809-like isoform X1 [Hydra vulgaris]	0	CCDCX_ANOGA	FALSE	0.442526	1245	1	0.750412	0.134639	ecEp_basal_disk,ecEp_battery_cell1(mp),ecEp_battery_cell2(mp),ecEp_head,ecEp_stem_cell,enEp_foot,enEp_tent-nem(pd),enEp_tentacle	ectoderm,endoderm	ecEp_basal_disk,ecEp_battery_cell,ecEp_head,ecEp_stem_cell,enEp_foot,enEp_tent-nem,enEp_tentacle	foot,head,body
t26296aep	t26296aep|CSDE1_HUMAN	PF00313.22;PF14444.6	CSD;S1-like	O75534|CSDE1_HUMAN Cold shock domain-containing protein E1 OS=Homo sapiens (Human)	0	PREDICTED: cold shock domain-containing protein E1-like [Hydra vulgaris]	0	CSDE1_HUMAN	FALSE	0.441929	1247	1	0.817212	0.066647	ecEp_stem_cell	ectoderm	ecEp_stem_cell	body
t788aep	t788aep|H2AY_CHICK	PF01661.21;PF16211.5;PF00125.24	Macro;Histone_H2A_C;Histone	O93327|H2AY_CHICK Core histone macro-H2A.1 OS=Gallus gallus (Chicken)	1.85e-107	PREDICTED: core histone macro-H2A.1-like [Hydra vulgaris]	0	H2AY_CHICK	FALSE	0.439952	1251	1	0.718546	0.161358	i_female_germline1,i_nb1,i_nb2,i_neuron/gland_cell_progenitor,i_neuron_progenitor,i_stem_cell/progenitor	germ line,interstitial	i_female_germline,i_nb,i_neuron_progenitor,i_stem_cell_progenitor	body
t17715aep	t17715aep|AIF1L_MOUSE	PF00036.32;PF13833.6;PF13499.6	EF-hand_1;EF-hand_8;EF-hand_7	Q9EQX4|AIF1L_MOUSE Allograft inflammatory factor 1-like OS=Mus musculus (Mouse)	4.36e-38	PREDICTED: allograft inflammatory factor 1-like [Hydra vulgaris]	1.89e-89	AIF1L_MOUSE	FALSE	0.439607	1252	1	0.7371	0.142114	ecEp_battery_cell1(mp),ecEp_battery_cell2(mp),enEp-nem(pd),enEp_foot,enEp_SC1,enEp_stem_cell,enEp_tent-nem(pd),enEp_tentacle	ectoderm,endoderm	ecEp_battery_cell,enEp-nem,enEp_foot,enEp_SC1,enEp_stem_cell,enEp_tent-nem,enEp_tentacle	head,foot,body
t34316aep	t34316aep|HYPK_MOUSE			Q9CR41|HYPK_MOUSE Huntingtin-interacting protein K OS=Mus musculus (Mouse)	3.48e-24	PREDICTED: huntingtin-interacting protein K-like [Hydra vulgaris]	6.13e-62	HYPK_MOUSE	FALSE	0.439374	1253	2	0.605353	0.273395	i_female_germline1,i_neuron/gland_cell_progenitor,i_SC,i_stem_cell/progenitor	germ line,interstitial	i_female_germline,i_neuron_progenitor,i_SC,i_stem_cell_progenitor	body
t7597aep	t7597aep	PF05672.11	MAP7			PREDICTED: myb-like protein X [Hydra vulgaris]	0		FALSE	0.439319	1254	1	0.878637	0	ecEp_battery_cell1(mp),ecEp_battery_cell2(mp),ecEp_head,i_nematocyte,i_neuron_ec1,i_neuron_ec2,i_neuron_en1	ectoderm,interstitial,endoderm	ecEp_battery_cell,ecEp_head,i_nematocyte,i_neuron_ec,i_neuron_en	head,nerve net
t24168aep	t24168aep	PF00822.20	PMP22_Claudin			PREDICTED: lens fiber membrane intrinsic protein-like [Hydra vulgaris]	3.09e-61		FALSE	0.438701	1255	2	0.436009	0.441393	ecEp_battery_cell1(mp),ecEp_battery_cell2(mp)	ectoderm	ecEp_battery_cell	head
t34991aep	t34991aep|RBM25_MOUSE	PF00076.22	RRM_1	B2RY56|RBM25_MOUSE RNA-binding protein 25 OS=Mus musculus (Mouse)	1.21e-47	PREDICTED: RNA-binding protein 25-like isoform X1 [Hydra vulgaris]	1.73e-137	RBM25_MOUSE	FALSE	0.438579	1256	1	0.877158	0	i_female_germline1,i_male_germline,i_nb1,i_neuron/gland_cell_progenitor,i_neuron_ec3,i_SC,i_stem_cell/progenitor	germ line,interstitial,ectoderm	i_female_germline,i_male_germline,i_nb,i_neuron_progenitor,i_neuron_ec,i_SC,i_stem_cell_progenitor	body,nerve net
t7721aep	t7721aep|EIF3J_XENLA	PF08597.10	eIF3_subunit	Q6INR1|EIF3J_XENLA Eukaryotic translation initiation factor 3 subunit J {ECO:0000255|HAMAP-Rule:MF_03009} OS=Xenopus laevis (African clawed frog)	1.05e-23	PREDICTED: eukaryotic translation initiation factor 3 subunit J-like [Hydra vulgaris]	1.47e-83	EIF3J_XENLA	FALSE	0.43825	1257	2	0.5555	0.321	i_female_germline1,i_male_germline,i_nb1,i_nb2,i_neuron/gland_cell_progenitor,i_neuron_progenitor,i_SC,i_stem_cell/progenitor	germ line,interstitial	i_female_germline,i_male_germline,i_nb,i_neuron_progenitor,i_SC,i_stem_cell_progenitor	body
t7583aep	t7583aep|BRD2_CANLF	PF00439.25;PF17035.5;PF17105.5	Bromodomain;BET;BRD4_CDT	Q5TJG6|BRD2_CANLF Bromodomain-containing protein 2 OS=Canis lupus familiaris (Dog) (Canis familiaris)	1.46e-104	PREDICTED: bromodomain-containing protein 3-like isoform X1 [Hydra vulgaris]	0	BRD2_CANLF	FALSE	0.436893	1258	1	0.873786	0	i_female_germline1,i_male_germline,i_nb1	germ line,interstitial	i_female_germline,i_male_germline,i_nb	body
t26541aep	t26541aep|UFM1_RAT	PF03671.14	Ufm1	Q5BJP3|UFM1_RAT Ubiquitin-fold modifier 1 OS=Rattus norvegicus (Rat)	2.73e-47	PREDICTED: ubiquitin-fold modifier 1 [Hydra vulgaris]	2.42e-51	UFM1_RAT	FALSE	0.436003	1259	2	0.370453	0.501554	i_female_germline2_nurse,i_male_germline,i_nb2,i_neuron/gland_cell_progenitor	germ line,interstitial	i_female_germline,i_male_germline,i_nb,i_neuron_progenitor	body
t3582aep	t3582aep								FALSE	0.435771	1260	1	0.871541	0	i_female_germline1,i_female_germline2_nurse,i_SC,i_stem_cell/progenitor	germ line,interstitial	i_female_germline,i_SC,i_stem_cell_progenitor	body
t22783aep	t22783aep|MANF_BOVIN	PF10208.9	Armet	P80513|MANF_BOVIN Mesencephalic astrocyte-derived neurotrophic factor OS=Bos taurus (Bovine)	1.77e-37	PREDICTED: mesencephalic astrocyte-derived neurotrophic factor homolog [Hydra vulgaris]	1.53e-78	MANF_BOVIN	FALSE	0.435613	1261	2	0.56573	0.305495	ecEp_basal_disk,i_nb3,i_nb4,i_nb5,i_nematocyte,i_neuron_ec2,i_neuron_en2	ectoderm,interstitial,endoderm	ecEp_basal_disk,i_nb,i_nematocyte,i_neuron_ec,i_neuron_en	foot,body,head,nerve net
t8660aep	t8660aep	PF08592.11	DUF1772			PREDICTED: uncharacterized protein LOC100205151 [Hydra vulgaris]	1.18e-109		FALSE	0.435453	1263	1	0.870907	0	ecEp_head,ecEp_stem_cell	ectoderm	ecEp_head,ecEp_stem_cell	head,body
t25838aep	t25838aep					PREDICTED: pollen-specific leucine-rich repeat extensin-like protein 1 [Hydra vulgaris]	2.52e-111		FALSE	0.433619	1268	1	0.748637	0.118601	i_nb2,i_nb3,i_nb4,i_nb5	interstitial	i_nb	body
t3940aep	t3940aep					PREDICTED: uncharacterized protein LOC100205913, partial [Hydra vulgaris]	0		FALSE	0.432474	1269	1	0.833783	0.0311641	i_female_germline1,i_nb1,i_neuron/gland_cell_progenitor,i_stem_cell/progenitor	germ line,interstitial	i_female_germline,i_nb,i_neuron_progenitor,i_stem_cell_progenitor	body
t37679aep	t37679aep|DCC_MOUSE	PF00041.21	fn3	P70211|DCC_MOUSE Netrin receptor DCC OS=Mus musculus (Mouse)	1.09e-11	PREDICTED: uncharacterized protein LOC100215940 [Hydra vulgaris]	0	DCC_MOUSE	FALSE	0.431765	1270	1	0.769377	0.0941539	ecEp_battery_cell2(mp),enEp-nem(pd),enEp_tent-nem(pd),i_nematocyte	ectoderm,endoderm,interstitial	ecEp_battery_cell,enEp-nem,enEp_tent-nem,i_nematocyte	head
t17291aep	t17291aep|PAPSS_URECA	PF01583.20;PF01747.17;PF14306.6	APS_kinase;ATP-sulfurylase;PUA_2	Q27128|PAPSS_URECA Bifunctional 3'-phosphoadenosine 5'-phosphosulfate synthase OS=Urechis caupo (Innkeeper worm) (Spoonworm)	0	PREDICTED: bifunctional 3'-phosphoadenosine 5'-phosphosulfate synthase-like [Hydra vulgaris]	0	PAPSS_URECA	FALSE	0.431347	1272	1	0.697067	0.165628	ecEp_battery_cell1(mp),ecEp_head,ecEp_stem_cell	ectoderm	ecEp_battery_cell,ecEp_head,ecEp_stem_cell	head,body
t28971aep	t28971aep|ANX12_HYDVU	PF00191.20	Annexin	P26256|ANX12_HYDVU Annexin-B12 OS=Hydra vulgaris (Hydra) (Hydra attenuata)	2.57e-138	PREDICTED: annexin-B12-like [Hydra vulgaris]	0	ANX12_HYDVU	FALSE	0.430254	1275	1	0.702712	0.157795	ecEp_battery_cell1(mp),ecEp_battery_cell2(mp)	ectoderm	ecEp_battery_cell	head
t34122aep	t34122aep|MAD1_MOUSE	PF00010.26	HLH	P50538|MAD1_MOUSE Max dimerization protein 1 OS=Mus musculus (Mouse)	3.68e-20	PREDICTED: max dimerization protein 1-like [Hydra vulgaris]	1.09e-87	MAD1_MOUSE	FALSE	0.42987	1277	1	0.747708	0.112033	ecEp_battery_cell1(mp),ecEp_battery_cell2(mp),enEp_tent-nem(pd),i_nb4,i_nb5,i_nematocyte,i_neuron/gland_cell_progenitor,i_neuron_progenitor	ectoderm,endoderm,interstitial	ecEp_battery_cell,enEp_tent-nem,i_nb,i_nematocyte,i_neuron_progenitor	head,body
t33778aep	t33778aep|LARP1_MOUSE	PF05383.17	La	Q6ZQ58|LARP1_MOUSE La-related protein 1 OS=Mus musculus (Mouse)	7.65e-128	PREDICTED: la-related protein 1B-like [Hydra vulgaris]	0	LARP1_MOUSE	FALSE	0.429624	1278	1	0.802425	0.0568228	i_female_germline1,i_female_germline2_nurse,i_nb1,i_nb2,i_neuron/gland_cell_progenitor,i_stem_cell/progenitor	germ line,interstitial	i_female_germline,i_nb,i_neuron_progenitor,i_stem_cell_progenitor	body
t14155aep	t14155aep|DPP2_RAT	PF05577.12	Peptidase_S28	Q9EPB1|DPP2_RAT Dipeptidyl peptidase 2 OS=Rattus norvegicus (Rat)	4.06e-150	PREDICTED: dipeptidyl peptidase 2-like [Hydra vulgaris]	0	DPP2_RAT	FALSE	0.429477	1279	1	0.858954	0	enEp-nem(pd),enEp_head,enEp_SC1,enEp_stem_cell,enEp_tent-nem(pd),enEp_tentacle	endoderm	enEp-nem,enEp_head,enEp_SC1,enEp_stem_cell,enEp_tent-nem,enEp_tentacle	head,body
t21221aep	t21221aep|RAB21_HUMAN	PF00071.22;PF08477.13;PF00025.21	Ras;Roc;Arf	Q9UL25|RAB21_HUMAN Ras-related protein Rab-21 OS=Homo sapiens (Human)	1.44e-102	PREDICTED: ras-related protein Rab-21-like [Hydra vulgaris]	2.64e-148	RAB21_HUMAN	FALSE	0.429391	1281	1	0.746874	0.111908	enEp_SC1,enEp_stem_cell	endoderm	enEp_SC1,enEp_stem_cell	body
t36022aep	t36022aep|CISD1_RAT	PF09360.10	zf-CDGSH	B0K020|CISD1_RAT CDGSH iron-sulfur domain-containing protein 1 OS=Rattus norvegicus (Rat)	1.54e-21	PREDICTED: CDGSH iron-sulfur domain-containing protein 1-like [Hydra vulgaris]	2.63e-66	CISD1_RAT	FALSE	0.428899	1282	1	0.857799	0	i_nb1,i_nb2,i_nb5,i_neuron/gland_cell_progenitor,i_neuron_ec1,i_neuron_progenitor	interstitial,ectoderm	i_nb,i_neuron_progenitor,i_neuron_ec	body,nerve net
t3553aep	t3553aep					PREDICTED: uncharacterized protein LOC105849032 [Hydra vulgaris]	6.9e-40		FALSE	0.428548	1283	2	0.640523	0.216572	ecEp_basal_disk,ecEp_stem_cell,i_female_germline1,i_female_germline2_nurse	ectoderm,germ line	ecEp_basal_disk,ecEp_stem_cell,i_female_germline	foot,body
t32455aep	t32455aep	PF04103.15	CD20			PREDICTED: uncharacterized protein LOC100198382 [Hydra vulgaris]	3.63e-93		FALSE	0.427895	1285	1	0.855789	0	enEp-nb(pd),enEp-nem(pd),enEp_foot,enEp_head,enEp_SC1,enEp_stem_cell,enEp_tentacle	endoderm	enEp-nb,enEp-nem,enEp_foot,enEp_head,enEp_SC1,enEp_stem_cell,enEp_tentacle	body,head,foot
t11055aep	t11055aep|LWA_HYDEC			Q25060|LWA_HYDEC LWamide neuropeptides OS=Hydractinia echinata (Snail fur) (Hermit crab hydroid)	1.3e-18	PREDICTED: LWamide neuropeptides [Hydra vulgaris] >gi|1698496|gb|AAB37238.1| LW-amid and MW-amid-containing preprohormone [Hydra vulgaris]	0	LWA_HYDEC	FALSE	0.427758	1286	1	0.855516	0	i_neuron_ec3,i_neuron_en1	ectoderm,endoderm	i_neuron_ec,i_neuron_en	nerve net
t32601aep	t32601aep|CYTSA_DANRE	PF00307.31;PF12510.8;PF11971.8	CH;Smoothelin;CAMSAP_CH	Q2KN93|CYTSA_DANRE Cytospin-A OS=Danio rerio (Zebrafish) (Brachydanio rerio)	5.13e-26	PREDICTED: cytospin-A-like isoform X2 [Hydra vulgaris] >gi|828205557|ref|XP_012556656.1| PREDICTED: cytospin-A-like isoform X2 [Hydra vulgaris]	0	CYTSA_DANRE	FALSE	0.426163	1288	1	0.852327	0	ecEp_battery_cell1(mp),ecEp_battery_cell2(mp),ecEp_stem_cell,enEp-nb(pd),enEp-nem(pd),enEp_foot,enEp_head,enEp_SC1,enEp_stem_cell,enEp_tent-nem(pd),enEp_tentacle	ectoderm,endoderm	ecEp_battery_cell,ecEp_stem_cell,enEp-nb,enEp-nem,enEp_foot,enEp_head,enEp_SC1,enEp_stem_cell,enEp_tent-nem,enEp_tentacle	head,body,foot
t5862aep	t5862aep|SP5K_BACSU	PF00004.29;PF13087.6;PF17866.1;PF13604.6;PF07728.14;PF13086.6;PF13401.6;PF05496.12;PF13245.6;PF01078.21;PF14532.6;PF00158.26;PF06309.11;PF00910.22;PF13238.6	AAA;AAA_12;AAA_lid_6;AAA_30;AAA_5;AAA_11;AAA_22;RuvB_N;AAA_19;Mg_chelatase;Sigma54_activ_2;Sigma54_activat;Torsin;RNA_helicase;AAA_18	P27643|SP5K_BACSU Stage V sporulation protein K OS=Bacillus subtilis (strain 168)	5.97e-34	PREDICTED: uncharacterized protein LOC101234364, partial [Hydra vulgaris]	0	SP5K_BACSU	FALSE	0.425979	1289	1	0.802529	0.0494282	ecEp_battery_cell2(mp),enEp_tent-nem(pd)	ectoderm,endoderm	ecEp_battery_cell,enEp_tent-nem	head
t8390aep	t8390aep					PREDICTED: nucleolar protein 58-like [Hydra vulgaris]	3.3e-102		FALSE	0.425367	1290	1	0.850734	0	i_neuron_ec2,i_neuron_ec3	ectoderm	i_neuron_ec	nerve net
t36541aep	t36541aep|PHB2_XENTR	PF01145.25	Band_7	A9UMS3|PHB2_XENTR Prohibitin-2 OS=Xenopus tropicalis (Western clawed frog) (Silurana tropicalis)	1.08e-137	PREDICTED: prohibitin-2-like [Hydra vulgaris]	0	PHB2_XENTR	FALSE	0.424397	1294	1	0.848793	0	i_female_germline1,i_SC,i_stem_cell/progenitor	germ line,interstitial	i_female_germline,i_SC,i_stem_cell_progenitor	body
t15950aep	t15950aep|NC2A_HUMAN	PF00808.23	CBFD_NFYB_HMF	Q14919|NC2A_HUMAN Dr1-associated corepressor OS=Homo sapiens (Human)	1.73e-38	PREDICTED: dr1-associated corepressor-like isoform X1 [Hydra vulgaris] >gi|828196833|ref|XP_012553665.1| PREDICTED: dr1-associated corepressor-like isoform X2 [Hydra vulgaris]	5.4e-117	NC2A_HUMAN	FALSE	0.421859	1298	1	0.733779	0.10994	i_male_germline,i_neuron_ec1	germ line,ectoderm	i_male_germline,i_neuron_ec	body,nerve net
t1778aep	t1778aep|SMD2_DROME	PF01423.22	LSM	Q9VI10|SMD2_DROME Probable small nuclear ribonucleoprotein Sm D2 OS=Drosophila melanogaster (Fruit fly)	6.79e-40	PREDICTED: small nuclear ribonucleoprotein Sm D2-like [Hydra vulgaris]	7.99e-60	SMD2_DROME	FALSE	0.421397	1299	1	0.732976	0.109819	i_female_germline1,i_female_germline2_nurse,i_nb1,i_nb2,i_neuron/gland_cell_progenitor,i_stem_cell/progenitor	germ line,interstitial	i_female_germline,i_nb,i_neuron_progenitor,i_stem_cell_progenitor	body
t30301aep	t30301aep|BLC_VIBCH	PF08212.12	Lipocalin_2	Q08790|BLC_VIBCH Outer membrane lipoprotein Blc OS=Vibrio cholerae serotype O1 (strain ATCC 39315 / El Tor Inaba N16961)	7.85e-13	PREDICTED: apolipoprotein D-like [Hydra vulgaris]	8.85e-94	BLC_VIBCH	FALSE	0.420692	1301	2	0.502226	0.339158	ecEp_basal_disk,enEp_SC1,i_female_germline2_nurse,i_zymogen_gland_cell	ectoderm,endoderm,germ line,interstitial	ecEp_basal_disk,enEp_SC1,i_female_germline,i_gland_cell	foot,body
t19306aep	t19306aep|ERD22_HUMAN	PF00810.18	ER_lumen_recept	P33947|ERD22_HUMAN ER lumen protein-retaining receptor 2 OS=Homo sapiens (Human)	1.35e-102	PREDICTED: LOW QUALITY PROTEIN: ER lumen protein-retaining receptor 2-like [Hydra vulgaris]	6.4e-126	ERD22_HUMAN	FALSE	0.419895	1303	1	0.839789	0	ecEp_basal_disk,i_nb2,i_nb3,i_spumous_mucous_gland_cell	ectoderm,interstitial	ecEp_basal_disk,i_nb,i_gland_cell	foot,body,head
t3212aep	t3212aep|SDHA_RAT	PF00890.24;PF02910.20;PF07992.14	FAD_binding_2;Succ_DH_flav_C;Pyr_redox_2	Q920L2|SDHA_RAT Succinate dehydrogenase [ubiquinone] flavoprotein subunit, mitochondrial OS=Rattus norvegicus (Rat)	0	PREDICTED: succinate dehydrogenase [ubiquinone] flavoprotein subunit, mitochondrial-like [Hydra vulgaris]	0	SDHA_RAT	FALSE	0.419544	1304	1	0.698121	0.140966	ecEp_battery_cell1(mp),ecEp_battery_cell2(mp)	ectoderm	ecEp_battery_cell	head
t19016aep	t19016aep|LTV1_MOUSE	PF04180.14	LTV	Q6NSQ7|LTV1_MOUSE Protein LTV1 homolog OS=Mus musculus (Mouse)	4.04e-56	PREDICTED: protein LTV1 homolog [Hydra vulgaris]	0	LTV1_MOUSE	FALSE	0.419424	1305	1	0.760075	0.0787731	i_male_germline,i_SC,i_stem_cell/progenitor	germ line,interstitial	i_male_germline,i_SC,i_stem_cell_progenitor	body
t12067aep	t12067aep					PREDICTED: uncharacterized protein LOC100208683 [Hydra vulgaris]	0		FALSE	0.418949	1306	1	0.837898	0	i_granular_mucous_gland_cell,i_zymogen_gland_cell	interstitial	i_granular_mucous_gland_cell,i_gland_cell	head,body
t13491aep	t13491aep					PREDICTED: uncharacterized protein LOC105844599 [Hydra vulgaris]	7.82e-08		FALSE	0.417841	1309	2	0.497609	0.338072	enEp-nb(pd),enEp-nem(pd),enEp_foot,enEp_head,enEp_SC1,enEp_stem_cell,enEp_tent-nem(pd),enEp_tentacle	endoderm	enEp-nb,enEp-nem,enEp_foot,enEp_head,enEp_SC1,enEp_stem_cell,enEp_tent-nem,enEp_tentacle	body,head,foot
t1187aep	t1187aep|RPAB2_BOVIN	PF01192.22	RNA_pol_Rpb6	Q32PE0|RPAB2_BOVIN DNA-directed RNA polymerases I, II, and III subunit RPABC2 OS=Bos taurus (Bovine)	2.83e-42	PREDICTED: DNA-directed RNA polymerases I, II, and III subunit RPABC2-like [Hydra vulgaris]	6.72e-53	RPAB2_BOVIN	FALSE	0.417534	1311	1	0.835068	0	i_female_germline1,i_neuron/gland_cell_progenitor	germ line,interstitial	i_female_germline,i_neuron_progenitor	body
t18235aep	t18235aep|ODP2_HUMAN	PF00198.23;PF00364.22;PF02817.17	2-oxoacid_dh;Biotin_lipoyl;E3_binding	P10515|ODP2_HUMAN Dihydrolipoyllysine-residue acetyltransferase component of pyruvate dehydrogenase complex, mitochondrial OS=Homo sapiens (Human)	7.67e-142	PREDICTED: dihydrolipoyllysine-residue acetyltransferase component of pyruvate dehydrogenase complex, mitochondrial-like [Hydra vulgaris]	0	ODP2_HUMAN	FALSE	0.417481	1312	1	0.647971	0.186991	enEp-nem(pd),enEp_head,enEp_stem_cell,i_neuron_ec1	endoderm,ectoderm	enEp-nem,enEp_head,enEp_stem_cell,i_neuron_ec	head,body,nerve net
t15248aep	t15248aep|ZN207_HUMAN			O43670|ZN207_HUMAN BUB3-interacting and GLEBS motif-containing protein ZNF207 {ECO:0000303|PubMed:24462186, ECO:0000303|PubMed:24462187} OS=Homo sapiens (Human)	7.16e-51	PREDICTED: BUB3-interacting and GLEBS motif-containing protein ZNF207-like isoform X1 [Hydra vulgaris]	1.98e-70	ZN207_HUMAN	FALSE	0.4172	1314	2	0.549712	0.284689	i_female_germline1,i_nb1,i_nb2,i_neuron/gland_cell_progenitor,i_stem_cell/progenitor	germ line,interstitial	i_female_germline,i_nb,i_neuron_progenitor,i_stem_cell_progenitor	body
t25389aep	t25389aep|PTPR2_HUMAN	PF00102.27	Y_phosphatase	Q92932|PTPR2_HUMAN Receptor-type tyrosine-protein phosphatase N2 OS=Homo sapiens (Human)	1.3e-129	PREDICTED: receptor-type tyrosine-protein phosphatase N2-like [Hydra vulgaris]	0	PTPR2_HUMAN	FALSE	0.417107	1315	1	0.675989	0.158225	ecEp_basal_disk,ecEp_battery_cell1(mp),ecEp_battery_cell2(mp),i_neuron_ec1,i_neuron_ec3,i_neuron_ec4,i_neuron_en1	ectoderm,endoderm	ecEp_basal_disk,ecEp_battery_cell,i_neuron_ec,i_neuron_en	foot,head,nerve net
t19653aep	t19653aep|PIPNA_BOVIN	PF02121.18	IP_trans	Q2HJ54|PIPNA_BOVIN Phosphatidylinositol transfer protein alpha isoform OS=Bos taurus (Bovine)	1.35e-88	PREDICTED: phosphatidylinositol transfer protein alpha isoform-like [Hydra vulgaris]	0	PIPNA_BOVIN	FALSE	0.416486	1316	2	0.438711	0.394262	enEp-nb(pd),enEp-nem(pd),enEp_foot,enEp_head,enEp_SC1,enEp_stem_cell,i_female_germline2_nurse	endoderm,germ line	enEp-nb,enEp-nem,enEp_foot,enEp_head,enEp_SC1,enEp_stem_cell,i_female_germline	body,head,foot
t12738aep	t12738aep|ZC3HF_HUMAN	PF16543.5;PF18345.1;PF00642.24;PF18044.1	DFRP_C;zf_CCCH_4;zf-CCCH;zf-CCCH_4	Q8WU90|ZC3HF_HUMAN Zinc finger CCCH domain-containing protein 15 OS=Homo sapiens (Human)	9.08e-63	PREDICTED: zinc finger CCCH domain-containing protein 15-like [Hydra vulgaris]	0	ZC3HF_HUMAN	FALSE	0.415643	1318	1	0.831285	0	i_female_germline1,i_nb1,i_nb2,i_neuron/gland_cell_progenitor,i_stem_cell/progenitor	germ line,interstitial	i_female_germline,i_nb,i_neuron_progenitor,i_stem_cell_progenitor	body
t19512aep	t19512aep|F174_XENLA	PF06679.12	DUF1180	Q640B5|F174_XENLA Membrane protein FAM174 OS=Xenopus laevis (African clawed frog)	6.24e-06	PREDICTED: membrane protein FAM174-like [Hydra vulgaris]	8.75e-55	F174_XENLA	FALSE	0.415204	1320	1	0.830408	0	i_female_germline1,i_female_germline2_nurse	germ line	i_female_germline	body
t13811aep	t13811aep|TSP2_MOUSE	PF00090.19	TSP_1	Q03350|TSP2_MOUSE Thrombospondin-2 OS=Mus musculus (Mouse)	1.99e-07	PREDICTED: uncharacterized protein LOC101241527 [Hydra vulgaris]	3.66e-99	TSP2_MOUSE	FALSE	0.414787	1321	1	0.829573	0	ecEp_battery_cell1(mp),ecEp_battery_cell2(mp),ecEp_head,ecEp_stem_cell	ectoderm	ecEp_battery_cell,ecEp_head,ecEp_stem_cell	head,body
t31894aep	t31894aep|GLRX2_BOVIN	PF00462.24	Glutaredoxin	Q32L67|GLRX2_BOVIN Glutaredoxin-2, mitochondrial OS=Bos taurus (Bovine)	5.45e-22	PREDICTED: glutaredoxin-2, mitochondrial isoform X1 [Physeter catodon]	3.2e-21	GLRX2_BOVIN	FALSE	0.414688	1322	1	0.829376	0	i_female_germline1,i_male_germline	germ line	i_female_germline,i_male_germline	body
t24393aep	t24393aep|PRS4_DROME	PF00004.29;PF17862.1;PF16450.5	AAA;AAA_lid_3;Prot_ATP_ID_OB	P48601|PRS4_DROME 26S protease regulatory subunit 4 OS=Drosophila melanogaster (Fruit fly)	0	PREDICTED: 26S protease regulatory subunit 4 [Hydra vulgaris]	0	PRS4_DROME	FALSE	0.413821	1325	1	0.759447	0.0681941	i_male_germline,i_nb1,i_neuron/gland_cell_progenitor,i_SC,i_stem_cell/progenitor	germ line,interstitial	i_male_germline,i_nb,i_neuron_progenitor,i_SC,i_stem_cell_progenitor	body
t14239aep	t14239aep|YPT1_PHYIN	PF00071.22;PF08477.13;PF00025.21;PF03193.16	Ras;Roc;Arf;RsgA_GTPase	Q01890|YPT1_PHYIN Ras-like GTP-binding protein YPT1 OS=Phytophthora infestans (Potato late blight fungus) (Botrytisinfestans)	1.62e-60	PREDICTED: ras-related protein RAB1BV-like [Hydra vulgaris]	2.27e-81	YPT1_PHYIN	FALSE	0.413296	1326	1	0.674772	0.15182	ecEp_basal_disk,ecEp_battery_cell1(mp),ecEp_battery_cell2(mp),ecEp_head	ectoderm	ecEp_basal_disk,ecEp_battery_cell,ecEp_head	foot,head
t32745aep	t32745aep|PRRT1_MOUSE	PF04505.12	CD225	O35449|PRRT1_MOUSE Proline-rich transmembrane protein 1 OS=Mus musculus (Mouse)	1.61e-09	PREDICTED: uncharacterized protein LOC100204385 isoform X1 [Hydra vulgaris]	1.55e-31	PRRT1_MOUSE	FALSE	0.412434	1328	1	0.824869	0	enEp-nb(pd),enEp-nem(pd),enEp_foot,enEp_head,enEp_SC1,enEp_stem_cell,enEp_tentacle	endoderm	enEp-nb,enEp-nem,enEp_foot,enEp_head,enEp_SC1,enEp_stem_cell,enEp_tentacle	body,head,foot
t6065aep	t6065aep								FALSE	0.411718	1329	2	0.615421	0.208016	i_nb3	interstitial	i_nb	body
t12570aep	t12570aep|COFI_GIBZE	PF00241.20	Cofilin_ADF	Q4I963|COFI_GIBZE Cofilin OS=Gibberella zeae (strain PH-1 / ATCC MYA-4620 / FGSC 9075 / NRRL 31084)(Wheat head blight fungus) (Fusarium graminearum)	4.55e-17	PREDICTED: cofilin-like [Hydra vulgaris]	5.41e-107	COFI_GIBZE	FALSE	0.411305	1330	1	0.822609	0	i_female_germline1,i_male_germline,i_nb1,i_nb2,i_nb4,i_nb5,i_nematocyte,i_neuron/gland_cell_progenitor,i_neuron_ec1,i_neuron_ec2,i_neuron_ec3,i_neuron_ec5,i_neuron_progenitor,i_SC,i_stem_cell/progenitor	germ line,interstitial,ectoderm	i_female_germline,i_male_germline,i_nb,i_nematocyte,i_neuron_progenitor,i_neuron_ec,i_SC,i_stem_cell_progenitor	body,head,nerve net
t29697aep	t29697aep					PREDICTED: serine/threonine-protein kinase fray2-like [Hydra vulgaris]	6.59e-77		FALSE	0.411027	1331	1	0.822055	0	i_female_germline2_nurse,i_male_germline,i_nb1,i_SC,i_stem_cell/progenitor	germ line,interstitial	i_female_germline,i_male_germline,i_nb,i_SC,i_stem_cell_progenitor	body
t1722aep	t1722aep|SYAC_HUMAN	PF01411.19;PF02272.19;PF07973.14	tRNA-synt_2c;DHHA1;tRNA_SAD	P49588|SYAC_HUMAN Alanine--tRNA ligase, cytoplasmic {ECO:0000255|HAMAP-Rule:MF_03133} OS=Homo sapiens (Human)	0	PREDICTED: alanine--tRNA ligase, cytoplasmic [Hydra vulgaris]	0	SYAC_HUMAN	FALSE	0.410464	1332	1	0.726346	0.0945826	i_female_germline1,i_female_germline2_nurse,i_nb1,i_nb2,i_SC,i_stem_cell/progenitor	germ line,interstitial	i_female_germline,i_nb,i_SC,i_stem_cell_progenitor	body
t20252aep	t20252aep								FALSE	0.410287	1333	2	0.489827	0.330747	ecEp_basal_disk,enEp_head	ectoderm,endoderm	ecEp_basal_disk,enEp_head	foot,head
t29886aep	t29886aep|ASTER_MOUSE	PF03669.13	UPF0139	Q6ZWX0|ASTER_MOUSE Protein Asterix OS=Mus musculus (Mouse)	1.07e-47	Protein Asterix [Exaiptasia pallida]	2.43e-54	ASTER_MOUSE	FALSE	0.410116	1334	1	0.820233	0	i_male_germline	germ line	i_male_germline	body
t18277aep	t18277aep|HNRPK_CHICK	PF00013.29;PF07650.17	KH_1;KH_2	Q5ZIQ3|HNRPK_CHICK Heterogeneous nuclear ribonucleoprotein K OS=Gallus gallus (Chicken)	1.68e-35	PREDICTED: heterogeneous nuclear ribonucleoprotein K-like isoform X1 [Hydra vulgaris]	0	HNRPK_CHICK	FALSE	0.410061	1336	1	0.820122	0	i_female_germline1,i_male_germline,i_nb1,i_neuron/gland_cell_progenitor,i_neuron_progenitor,i_stem_cell/progenitor	germ line,interstitial	i_female_germline,i_male_germline,i_nb,i_neuron_progenitor,i_stem_cell_progenitor	body
t6791aep	t6791aep|MCTS1_MOUSE	PF17832.1;PF01472.20	Pre-PUA;PUA	Q9DB27|MCTS1_MOUSE Malignant T-cell-amplified sequence 1 OS=Mus musculus (Mouse)	1.11e-84	PREDICTED: malignant T-cell-amplified sequence 1-like [Hydra vulgaris]	1.46e-130	MCTS1_MOUSE	FALSE	0.409867	1337	1	0.819735	0	i_female_germline1,i_nb1,i_neuron/gland_cell_progenitor,i_stem_cell/progenitor	germ line,interstitial	i_female_germline,i_nb,i_neuron_progenitor,i_stem_cell_progenitor	body
t6761aep	t6761aep					PREDICTED: uncharacterized protein LOC100202370 [Hydra vulgaris]	9.45e-60		FALSE	0.409718	1338	1	0.819436	0	i_nb2,i_nb3,i_nb4,i_nb5	interstitial	i_nb	body
t1562aep	t1562aep|CBS_HUMAN	PF00291.25;PF00571.28	PALP;CBS	P35520|CBS_HUMAN Cystathionine beta-synthase {ECO:0000305} OS=Homo sapiens (Human)	0	PREDICTED: cystathionine beta-synthase [Hydra vulgaris]	0	CBS_HUMAN	FALSE	0.409135	1340	1	0.711789	0.106481	enEp_tent-nem(pd),enEp_tentacle,i_female_germline1,i_nb1,i_nb2,i_neuron/gland_cell_progenitor,i_stem_cell/progenitor	endoderm,germ line,interstitial	enEp_tent-nem,enEp_tentacle,i_female_germline,i_nb,i_neuron_progenitor,i_stem_cell_progenitor	head,body
t5060aep	t5060aep|MYH10_RAT	PF01576.19	Myosin_tail_1	Q9JLT0|MYH10_RAT Myosin-10 OS=Rattus norvegicus (Rat)	1.52e-26	PREDICTED: myosin heavy chain, embryonic smooth muscle isoform-like [Hydra vulgaris]	0	MYH10_RAT	FALSE	0.409005	1341	1	0.76873	0.0492802	ecEp_battery_cell1(mp),ecEp_battery_cell2(mp),ecEp_head,ecEp_stem_cell	ectoderm	ecEp_battery_cell,ecEp_head,ecEp_stem_cell	head,body
t10690aep	t10690aep					PREDICTED: uncharacterized protein LOC100205676 [Hydra vulgaris]	4.29e-125		FALSE	0.409	1342	1	0.817999	0	ecEp_battery_cell1(mp),ecEp_battery_cell2(mp),ecEp_head,ecEp_stem_cell	ectoderm	ecEp_battery_cell,ecEp_head,ecEp_stem_cell	head,body
t20368aep	t20368aep|CPEB1_PONAB	PF16367.5;PF16366.5;PF00076.22	RRM_7;CEBP_ZZ;RRM_1	Q5R733|CPEB1_PONAB Cytoplasmic polyadenylation element-binding protein 1 OS=Pongo abelii (Sumatran orangutan) (Pongo pygmaeus abelii)	1.19e-132	PREDICTED: uncharacterized protein LOC101241841, partial [Hydra vulgaris]	0	CPEB1_PONAB	FALSE	0.408905	1343	1	0.817809	0	ecEp_basal_disk,ecEp_battery_cell1(mp),ecEp_battery_cell2(mp),ecEp_head,enEp-nem(pd),enEp_foot,enEp_head,enEp_SC1,enEp_stem_cell,enEp_tent-nem(pd),enEp_tentacle	ectoderm,endoderm	ecEp_basal_disk,ecEp_battery_cell,ecEp_head,enEp-nem,enEp_foot,enEp_head,enEp_SC1,enEp_stem_cell,enEp_tent-nem,enEp_tentacle	foot,head,body
t11013aep	t11013aep|NOVA1_MACFA	PF00013.29;PF07650.17;PF13083.6	KH_1;KH_2;KH_4	Q2PFW9|NOVA1_MACFA RNA-binding protein Nova-1 OS=Macaca fascicularis (Crab-eating macaque) (Cynomolgus monkey)	1.77e-28	PREDICTED: RNA-binding protein Nova-1-like [Hydra vulgaris] >gi|828192855|ref|XP_012561497.1| PREDICTED: RNA-binding protein Nova-1-like [Hydra vulgaris]	0	NOVA1_MACFA	FALSE	0.408713	1344	1	0.731777	0.085649	i_female_germline1,i_nb1,i_neuron/gland_cell_progenitor,i_stem_cell/progenitor	germ line,interstitial	i_female_germline,i_nb,i_neuron_progenitor,i_stem_cell_progenitor	body
t31256aep	t31256aep|ABRAL_SALSA	PF14705.6	Costars	B5X8A5|ABRAL_SALSA Costars family protein ABRACL OS=Salmo salar (Atlantic salmon)	1.76e-36	PREDICTED: costars family protein ABRACL-like [Hydra vulgaris]	1.39e-51	ABRAL_SALSA	FALSE	0.408615	1346	1	0.81723	0	ecEp_battery_cell1(mp),ecEp_battery_cell2(mp),ecEp_head,enEp-nb(pd),enEp-nem(pd),enEp_foot,enEp_head,enEp_SC1,enEp_stem_cell,enEp_tentacle	ectoderm,endoderm	ecEp_battery_cell,ecEp_head,enEp-nb,enEp-nem,enEp_foot,enEp_head,enEp_SC1,enEp_stem_cell,enEp_tentacle	head,body,foot
t6504aep	t6504aep|PLBL2_HUMAN	PF04916.13	Phospholip_B	Q8NHP8|PLBL2_HUMAN Putative phospholipase B-like 2 OS=Homo sapiens (Human)	1.45e-155	PREDICTED: putative phospholipase B-like 2 [Hydra vulgaris]	0	PLBL2_HUMAN	FALSE	0.408243	1351	1	0.704835	0.111651	enEp-nb(pd),enEp-nem(pd),enEp_foot,enEp_head,enEp_SC1,enEp_stem_cell,enEp_tent-nem(pd),enEp_tentacle	endoderm	enEp-nb,enEp-nem,enEp_foot,enEp_head,enEp_SC1,enEp_stem_cell,enEp_tent-nem,enEp_tentacle	body,head,foot
t26998aep	t26998aep|MARK3_HUMAN	PF00069.25;PF07714.17;PF02149.19;PF14531.6	Pkinase;Pkinase_Tyr;KA1;Kinase-like	P27448|MARK3_HUMAN MAP/microtubule affinity-regulating kinase 3 OS=Homo sapiens (Human)	0	PREDICTED: MAP/microtubule affinity-regulating kinase 3 isoform X1 [Hydra vulgaris]	0	MARK3_HUMAN	FALSE	0.407878	1352	1	0.746478	0.0692779	ecEp_basal_disk,ecEp_battery_cell1(mp),ecEp_battery_cell2(mp),enEp_tent-nem(pd),enEp_tentacle,i_female_germline2_nurse,i_neuron_ec3	ectoderm,endoderm,germ line	ecEp_basal_disk,ecEp_battery_cell,enEp_tent-nem,enEp_tentacle,i_female_germline,i_neuron_ec	foot,head,body,nerve net
t9538aep	t9538aep|PSMD8_PONAB	PF10075.9	CSN8_PSD8_EIF3K	Q5RE15|PSMD8_PONAB 26S proteasome non-ATPase regulatory subunit 8 OS=Pongo abelii (Sumatran orangutan) (Pongo pygmaeus abelii)	9.8e-95	PREDICTED: 26S proteasome non-ATPase regulatory subunit 8-like [Hydra vulgaris]	0	PSMD8_PONAB	FALSE	0.407751	1353	2	0.562538	0.252963	i_female_germline1,i_male_germline,i_nb1,i_neuron/gland_cell_progenitor,i_SC,i_stem_cell/progenitor	germ line,interstitial	i_female_germline,i_male_germline,i_nb,i_neuron_progenitor,i_SC,i_stem_cell_progenitor	body
t17954aep	t17954aep|GNA13_MOUSE	PF00503.20;PF00025.21	G-alpha;Arf	P27601|GNA13_MOUSE Guanine nucleotide-binding protein subunit alpha-13 OS=Mus musculus (Mouse)	1.52e-151	PREDICTED: guanine nucleotide-binding protein subunit alpha-12 [Hydra vulgaris]	0	GNA13_MOUSE	FALSE	0.406616	1355	1	0.753542	0.0596897	ecEp_battery_cell1(mp),ecEp_battery_cell2(mp),ecEp_stem_cell,i_neuron_en2	ectoderm,endoderm	ecEp_battery_cell,ecEp_stem_cell,i_neuron_en	head,body,nerve net
t20129aep	t20129aep|PDCL3_DANRE	PF02114.16	Phosducin	Q6P268|PDCL3_DANRE Phosducin-like protein 3 OS=Danio rerio (Zebrafish) (Brachydanio rerio)	3.48e-72	PREDICTED: phosducin-like protein 3 [Hydra vulgaris]	4.91e-159	PDCL3_DANRE	FALSE	0.405703	1356	2	0.559717	0.25169	enEp_tent-nem(pd),enEp_tentacle,i_female_germline1	endoderm,germ line	enEp_tent-nem,enEp_tentacle,i_female_germline	head,body
t36493aep	t36493aep					hypothetical protein PBRA_000463 [Plasmodiophora brassicae]	2.79e-44		FALSE	0.405591	1357	2	0.344709	0.466472	i_female_germline1,i_nb1,i_neuron/gland_cell_progenitor,i_SC,i_stem_cell/progenitor	germ line,interstitial	i_female_germline,i_nb,i_neuron_progenitor,i_SC,i_stem_cell_progenitor	body
t5497aep	t5497aep|DDX6_CHICK	PF00270.29;PF00271.31	DEAD;Helicase_C	Q5ZKB9|DDX6_CHICK Probable ATP-dependent RNA helicase DDX6 OS=Gallus gallus (Chicken)	0	PREDICTED: probable ATP-dependent RNA helicase DDX6 [Hydra vulgaris]	0	DDX6_CHICK	FALSE	0.40502	1359	1	0.76124	0.0487994	i_female_germline1,i_female_germline2_nurse,i_male_germline	germ line	i_female_germline,i_male_germline	body
t9382aep	t9382aep|QCR9_BOVIN	PF05365.12	UCR_UQCRX_QCR9	P00130|QCR9_BOVIN Cytochrome b-c1 complex subunit 9 OS=Bos taurus (Bovine)	8.07e-18	predicted protein [Nematostella vectensis] >gi|156226631|gb|EDO47439.1| predicted protein [Nematostella vectensis]	4.39e-16	QCR9_BOVIN	FALSE	0.404666	1360	1	0.809332	0	ecEp_head,i_male_germline	ectoderm,germ line	ecEp_head,i_male_germline	head,body
t2352aep	t2352aep|AGRIN_CHICK	PF07648.15;PF00050.21	Kazal_2;Kazal_1	P31696|AGRIN_CHICK Agrin OS=Gallus gallus (Chicken)	2.68e-16	kazal-type serine protease inihibitor 3 precursor [Hydra vulgaris] >gi|219881820|gb|ACL52154.1| kazal-type serine protease inihibitor 3 [Hydra vulgaris]	4.47e-29	AGRIN_CHICK	FALSE	0.404626	1361	1	0.809251	0	enEp-nb(pd),enEp-nem(pd),enEp_foot,enEp_SC1,enEp_stem_cell	endoderm	enEp-nb,enEp-nem,enEp_foot,enEp_SC1,enEp_stem_cell	body,head,foot
t15328aep	t15328aep|ERF3B_MOUSE	PF00009.27;PF03143.17;PF03144.25	GTP_EFTU;GTP_EFTU_D3;GTP_EFTU_D2	Q149F3|ERF3B_MOUSE Eukaryotic peptide chain release factor GTP-binding subunit ERF3B OS=Mus musculus (Mouse)	0	PREDICTED: eukaryotic peptide chain release factor GTP-binding subunit ERF3A-like [Hydra vulgaris]	0	ERF3B_MOUSE	FALSE	0.40422	1362	1	0.754944	0.0534969	i_female_germline1,i_nb1,i_nb2,i_neuron/gland_cell_progenitor,i_stem_cell/progenitor	germ line,interstitial	i_female_germline,i_nb,i_neuron_progenitor,i_stem_cell_progenitor	body
t12447aep	t12447aep|PRPX_HORVU			P16273|PRPX_HORVU Pathogen-related protein OS=Hordeum vulgare (Barley)	5.43e-32	PREDICTED: pathogen-related protein-like [Hydra vulgaris]	4.48e-111	PRPX_HORVU	FALSE	0.404083	1363	1	0.808166	0	ecEp_basal_disk,ecEp_battery_cell1(mp),ecEp_battery_cell2(mp),ecEp_head,ecEp_stem_cell	ectoderm	ecEp_basal_disk,ecEp_battery_cell,ecEp_head,ecEp_stem_cell	foot,head,body
t12718aep	t12718aep	PF01607.24	CBM_14			PREDICTED: uncharacterized protein LOC100199767 [Hydra vulgaris]	4.29e-98		FALSE	0.403596	1365	1	0.807192	0	ecEp_basal_disk	ectoderm	ecEp_basal_disk	foot
t13138aep	t13138aep|GBG2_PONAB	PF00631.22	G-gamma	Q5R7U4|GBG2_PONAB Guanine nucleotide-binding protein G(I)/G(S)/G(O) subunit gamma-2 OS=Pongo abelii (Sumatran orangutan) (Pongo pygmaeus abelii)	9.87e-14	PREDICTED: guanine nucleotide-binding protein subunit gamma-like [Hydra vulgaris]	2.33e-44	GBG2_PONAB	FALSE	0.403372	1366	1	0.806744	0	ecEp_battery_cell1(mp),ecEp_battery_cell2(mp),ecEp_head,ecEp_stem_cell,i_neuron_ec1	ectoderm	ecEp_battery_cell,ecEp_head,ecEp_stem_cell,i_neuron_ec	head,body,nerve net
t8856aep	t8856aep|YH24_CAEEL	PF00883.21	Peptidase_M17	Q27245|YH24_CAEEL Putative aminopeptidase W07G4.4 OS=Caenorhabditis elegans	6.18e-129	PREDICTED: putative aminopeptidase W07G4.4 [Hydra vulgaris]	0	YH24_CAEEL	FALSE	0.403121	1367	1	0.739814	0.066428	enEp-nem(pd),enEp_SC1,enEp_stem_cell	endoderm	enEp-nem,enEp_SC1,enEp_stem_cell	head,body
t25501aep	t25501aep|CEL3B_MOUSE	PF00089.26;PF13365.6	Trypsin;Trypsin_2	Q9CQ52|CEL3B_MOUSE Chymotrypsin-like elastase family member 3B OS=Mus musculus (Mouse)	1.23e-43	PREDICTED: chymotrypsin-like elastase family member 3B [Hydra vulgaris]	8.4e-172	CEL3B_MOUSE	FALSE	0.4028	1369	1	0.8056	0	i_granular_mucous_gland_cell,i_zymogen_gland_cell	interstitial	i_granular_mucous_gland_cell,i_gland_cell	head,body
t3364aep	t3364aep|NPRL2_BOVIN	PF06218.11	NPR2	Q5E9U9|NPRL2_BOVIN Nitrogen permease regulator 2-like protein OS=Bos taurus (Bovine)	2.19e-112	PREDICTED: nitrogen permease regulator 2-like protein [Hydra vulgaris]	0	NPRL2_BOVIN	FALSE	0.401568	1373	2	0.521925	0.281212	i_female_germline1,i_male_germline,i_nb1,i_SC,i_stem_cell/progenitor	germ line,interstitial	i_female_germline,i_male_germline,i_nb,i_SC,i_stem_cell_progenitor	body
t29171aep	t29171aep|PSB4_XENLA	PF00227.26	Proteasome	P28024|PSB4_XENLA Proteasome subunit beta type-4 OS=Xenopus laevis (African clawed frog)	4.43e-94	PREDICTED: proteasome subunit beta type-4-like [Hydra vulgaris]	1.15e-178	PSB4_XENLA	FALSE	0.401063	1375	1	0.802126	0	i_female_germline1,i_female_germline2_nurse,i_male_germline,i_nb1,i_SC,i_stem_cell/progenitor	germ line,interstitial	i_female_germline,i_male_germline,i_nb,i_SC,i_stem_cell_progenitor	body
t33446aep	t33446aep|TOM7_HUMAN	PF08038.12	Tom7	Q9P0U1|TOM7_HUMAN Mitochondrial import receptor subunit TOM7 homolog OS=Homo sapiens (Human)	2.83e-18	predicted protein [Nematostella vectensis] >gi|156223909|gb|EDO44739.1| predicted protein [Nematostella vectensis]	7.63e-18	TOM7_HUMAN	FALSE	0.401047	1376	2	0.338904	0.46319	i_nb1,i_neuron/gland_cell_progenitor,i_neuron_progenitor,i_SC,i_stem_cell/progenitor	interstitial	i_nb,i_neuron_progenitor,i_SC,i_stem_cell_progenitor	body
t32504aep	t32504aep|RPN2_PONAB	PF05817.14	Ribophorin_II	Q5RBM1|RPN2_PONAB Dolichyl-diphosphooligosaccharide--protein glycosyltransferase subunit 2 OS=Pongo abelii (Sumatran orangutan) (Pongo pygmaeus abelii)	1.15e-88	PREDICTED: dolichyl-diphosphooligosaccharide--protein glycosyltransferase subunit 2-like isoform X1 [Hydra vulgaris]	0	RPN2_PONAB	FALSE	0.400934	1377	1	0.720503	0.0813647	i_female_germline1,i_female_germline2_nurse,i_nb1,i_nb2	germ line,interstitial	i_female_germline,i_nb	body
t33101aep	t33101aep|SAFB1_MOUSE	PF02037.27;PF00076.22	SAP;RRM_1	D3YXK2|SAFB1_MOUSE Scaffold attachment factor B1 OS=Mus musculus (Mouse)	1.77e-27	PREDICTED: trichohyalin-like [Hydra vulgaris]	0	SAFB1_MOUSE	FALSE	0.399347	1379	1	0.716111	0.0825838	i_female_germline1,i_female_germline2_nurse,i_nb1,i_neuron/gland_cell_progenitor,i_SC,i_stem_cell/progenitor	germ line,interstitial	i_female_germline,i_nb,i_neuron_progenitor,i_SC,i_stem_cell_progenitor	body
t32501aep	t32501aep|GPMI_ONCVO	PF01676.18;PF06415.13	Metalloenzyme;iPGM_N	I6LDA6|GPMI_ONCVO 2,3-bisphosphoglycerate-independent phosphoglycerate mutase {ECO:0000305|PubMed:17897734} OS=Onchocerca volvulus	0	PREDICTED: 2,3-bisphosphoglycerate-independent phosphoglycerate mutase-like [Hydra vulgaris]	0	GPMI_ONCVO	FALSE	0.399233	1380	1	0.669631	0.128835	enEp-nem(pd),enEp_foot,enEp_tent-nem(pd),i_male_germline	endoderm,germ line	enEp-nem,enEp_foot,enEp_tent-nem,i_male_germline	head,foot,body
t29291aep	t29291aep|SP4_MOUSE	PF00096.26;PF13465.6	zf-C2H2;zf-H2C2_2	Q62445|SP4_MOUSE Transcription factor Sp4 OS=Mus musculus (Mouse)	3.54e-55	PREDICTED: transcription factor Sp5-like [Hydra vulgaris]	0	SP4_MOUSE	FALSE	0.39917	1381	2	0.477081	0.32126	ecEp_battery_cell1(mp),ecEp_battery_cell2(mp),enEp_head,enEp_tentacle	ectoderm,endoderm	ecEp_battery_cell,enEp_head,enEp_tentacle	head
t5523aep	t5523aep|CATB_RAT	PF00112.23;PF08127.13	Peptidase_C1;Propeptide_C1	P07688|CATB_BOVIN Cathepsin B OS=Bos taurus (Bovine)	1.81e-116	PREDICTED: cathepsin B-like [Hydra vulgaris] >gi|828197775|ref|XP_012554002.1| PREDICTED: cathepsin B-like [Hydra vulgaris]	0	CATB_RAT	FALSE	0.399014	1382	1	0.798029	0	enEp-nb(pd),enEp-nem(pd),enEp_foot,enEp_head,enEp_SC1,enEp_stem_cell,enEp_tent-nem(pd),enEp_tentacle	endoderm	enEp-nb,enEp-nem,enEp_foot,enEp_head,enEp_SC1,enEp_stem_cell,enEp_tent-nem,enEp_tentacle	body,head,foot
t12921aep	t12921aep|ODO1_HUMAN	PF00676.20;PF02779.24;PF16870.5;PF16078.5	E1_dh;Transket_pyr;OxoGdeHyase_C;2-oxogl_dehyd_N	Q02218|ODO1_HUMAN 2-oxoglutarate dehydrogenase, mitochondrial OS=Homo sapiens (Human)	0	PREDICTED: 2-oxoglutarate dehydrogenase, mitochondrial [Hydra vulgaris]	0	ODO1_HUMAN	FALSE	0.398944	1383	1	0.769142	0.0287461	ecEp_battery_cell1(mp),ecEp_battery_cell2(mp)	ectoderm	ecEp_battery_cell	head
t11367aep	t11367aep|COX42_THUOB	PF02936.14	COX4	P80971|COX42_THUOB Cytochrome c oxidase subunit 4 isoform 2, mitochondrial OS=Thunnus obesus (Bigeye tuna)	2.62e-13	PREDICTED: cytochrome c oxidase subunit 4 isoform 2, mitochondrial-like [Hydra vulgaris]	2.06e-98	COX42_THUOB	FALSE	0.398881	1384	1	0.797762	0	enEp_stem_cell	endoderm	enEp_stem_cell	body
t587aep	t587aep	PF02275.18	CBAH			PREDICTED: uncharacterized protein LOC100207462 [Hydra vulgaris]	0		FALSE	0.398743	1386	1	0.797486	0	ecEp_battery_cell1(mp),ecEp_battery_cell2(mp),ecEp_head,ecEp_stem_cell	ectoderm	ecEp_battery_cell,ecEp_head,ecEp_stem_cell	head,body
t16085aep	t16085aep					hypothetical protein CGI_10005738 [Crassostrea gigas]	3.61e-19		FALSE	0.398643	1387	1	0.797286	2.11763e-09	ecEp_head,ecEp_stem_cell	ectoderm	ecEp_head,ecEp_stem_cell	head,body
t28673aep	t28673aep|CHI3_CANAL	PF00704.28;PF01607.24	Glyco_hydro_18;CBM_14	P40954|CHI3_CANAL Chitinase 3 OS=Candida albicans (strain SC5314 / ATCC MYA-2876) (Yeast)	1.81e-46	chitinase 2 [Hydractinia echinata]	0	CHI3_CANAL	FALSE	0.398531	1388	1	0.797061	0	i_granular_mucous_gland_cell,i_neuron_en1,i_zymogen_gland_cell	interstitial,endoderm	i_granular_mucous_gland_cell,i_neuron_en,i_gland_cell	head,nerve net,body
t14411aep	t14411aep|PRS7_MACFA	PF00004.29;PF17862.1	AAA;AAA_lid_3	Q4R4R0|PRS7_MACFA 26S protease regulatory subunit 7 OS=Macaca fascicularis (Crab-eating macaque) (Cynomolgus monkey)	0	PREDICTED: 26S protease regulatory subunit 7 [Hydra vulgaris]	0	PRS7_MACFA	FALSE	0.398317	1389	1	0.796633	0	i_male_germline	germ line	i_male_germline	body
t28774aep	t28774aep	PF07716.15	bZIP_2			PREDICTED: thyrotroph embryonic factor-like [Hydra vulgaris]	5.03e-177		FALSE	0.397506	1391	2	0.503906	0.291107	ecEp_battery_cell1(mp),ecEp_battery_cell2(mp),enEp_tent-nem(pd),enEp_tentacle,i_nematocyte,i_neuron_ec1	ectoderm,endoderm,interstitial	ecEp_battery_cell,enEp_tent-nem,enEp_tentacle,i_nematocyte,i_neuron_ec	head,nerve net
t34467aep	t34467aep|GAPR1_MOUSE	PF00188.26	CAP	Q9CYL5|GAPR1_MOUSE Golgi-associated plant pathogenesis-related protein 1 OS=Mus musculus (Mouse)	1.9e-33	PREDICTED: cell wall protein PRY3-like [Hydra vulgaris]	0	GAPR1_MOUSE	FALSE	0.39614	1392	1	0.705812	0.0864673	ecEp_head,enEp_head,i_nematocyte	ectoderm,endoderm,interstitial	ecEp_head,enEp_head,i_nematocyte	head
t5458aep	t5458aep	PF04201.15	TPD52			PREDICTED: uncharacterized protein LOC100207039 isoform X1 [Hydra vulgaris]	1.04e-105		FALSE	0.396005	1393	1	0.623573	0.168437	ecEp_basal_disk,ecEp_battery_cell1(mp),ecEp_stem_cell,enEp-nb(pd),enEp-nem(pd),enEp_foot,enEp_head,enEp_SC1,enEp_stem_cell,enEp_tentacle,i_spumous_mucous_gland_cell	ectoderm,endoderm,interstitial	ecEp_basal_disk,ecEp_battery_cell,ecEp_stem_cell,enEp-nb,enEp-nem,enEp_foot,enEp_head,enEp_SC1,enEp_stem_cell,enEp_tentacle,i_gland_cell	foot,head,body
t15945aep	t15945aep|PLST_HUMAN	PF00307.31;PF00036.32;PF13405.6;PF13499.6;PF13202.6	CH;EF-hand_1;EF-hand_6;EF-hand_7;EF-hand_5	P13797|PLST_HUMAN Plastin-3 OS=Homo sapiens (Human)	0	PREDICTED: plastin-1-like [Hydra vulgaris]	0	PLST_HUMAN	FALSE	0.395904	1394	2	0.58263	0.209177	ecEp_battery_cell1(mp),ecEp_battery_cell2(mp)	ectoderm	ecEp_battery_cell	head
t3673aep	t3673aep|PSB7_RAT	PF00227.26;PF12465.8	Proteasome;Pr_beta_C	Q9JHW0|PSB7_RAT Proteasome subunit beta type-7 OS=Rattus norvegicus (Rat)	2.01e-120	PREDICTED: proteasome subunit beta type-7-like [Hydra vulgaris]	0	PSB7_RAT	FALSE	0.395491	1396	1	0.790983	0	i_nb1,i_SC,i_stem_cell/progenitor	interstitial	i_nb,i_SC,i_stem_cell_progenitor	body
t8848aep	t8848aep|SC24A_BOVIN	PF04811.15;PF04815.15;PF08033.12;PF04810.15	Sec23_trunk;Sec23_helical;Sec23_BS;zf-Sec23_Sec24	A6QNT8|SC24A_BOVIN Protein transport protein Sec24A OS=Bos taurus (Bovine)	0	PREDICTED: protein transport protein Sec24A-like [Hydra vulgaris]	0	SC24A_BOVIN	FALSE	0.395481	1397	1	0.790961	0	ecEp_basal_disk	ectoderm	ecEp_basal_disk	foot
t29669aep	t29669aep					PREDICTED: optineurin-like [Hydra vulgaris]	1.06e-42		FALSE	0.39528	1398	1	0.790561	0	enEp-nb(pd),enEp-nem(pd),enEp_foot,enEp_head,enEp_SC1,enEp_stem_cell,enEp_tent-nem(pd),enEp_tentacle	endoderm	enEp-nb,enEp-nem,enEp_foot,enEp_head,enEp_SC1,enEp_stem_cell,enEp_tent-nem,enEp_tentacle	body,head,foot
t11183aep	t11183aep|ASNS_CHICK	PF00733.21;PF13537.6;PF13522.6	Asn_synthase;GATase_7;GATase_6	Q5ZJU3|ASNS_CHICK Asparagine synthetase [glutamine-hydrolyzing] OS=Gallus gallus (Chicken)	0	PREDICTED: asparagine synthetase [glutamine-hydrolyzing]-like [Hydra vulgaris]	0	ASNS_CHICK	FALSE	0.394853	1399	1	0.731746	0.0579604	i_female_germline1,i_nb2,i_neuron/gland_cell_progenitor,i_SC,i_stem_cell/progenitor	germ line,interstitial	i_female_germline,i_nb,i_neuron_progenitor,i_SC,i_stem_cell_progenitor	body
t13127aep	t13127aep|CAPZA_DROME	PF01267.17	F-actin_cap_A	Q9W2N0|CAPZA_DROME F-actin-capping protein subunit alpha OS=Drosophila melanogaster (Fruit fly)	8.95e-120	PREDICTED: F-actin-capping protein subunit alpha-2-like [Hydra vulgaris]	0	CAPZA_DROME	FALSE	0.39478	1400	1	0.789561	0	ecEp_battery_cell1(mp),ecEp_battery_cell2(mp),ecEp_head	ectoderm	ecEp_battery_cell,ecEp_head	head
t19515aep	t19515aep|TRPM3_HUMAN	PF18139.1;PF18171.1;PF00520.31	LSDAT_euk;LSDAT_prok;Ion_trans	Q9HCF6|TRPM3_HUMAN Transient receptor potential cation channel subfamily M member 3 OS=Homo sapiens (Human)	6.14e-163	PREDICTED: LOW QUALITY PROTEIN: transient receptor potential cation channel subfamily M member 7-like [Hydra vulgaris]	0	TRPM3_HUMAN	FALSE	0.392211	1403	1	0.644549	0.139872	ecEp_basal_disk,ecEp_battery_cell1(mp),ecEp_battery_cell2(mp),ecEp_head,ecEp_stem_cell	ectoderm	ecEp_basal_disk,ecEp_battery_cell,ecEp_head,ecEp_stem_cell	foot,head,body
t15736aep	t15736aep	PF02205.20	WH2			PREDICTED: WAS/WASL-interacting protein family member 1-like [Hydra vulgaris]	1.15e-147		FALSE	0.392043	1404	2	0.566253	0.217832	ecEp_battery_cell1(mp),ecEp_battery_cell2(mp),enEp_head,enEp_tentacle	ectoderm,endoderm	ecEp_battery_cell,enEp_head,enEp_tentacle	head
t32609aep	t32609aep|OPTN_DANRE	PF16516.5;PF18414.1	CC2-LZ;zf_C2H2_10	Q5RI56|OPTN_DANRE Optineurin OS=Danio rerio (Zebrafish) (Brachydanio rerio)	4.07e-13	PREDICTED: optineurin-like [Hydra vulgaris]	0	OPTN_DANRE	FALSE	0.39167	1405	2	0.509069	0.274272	ecEp_battery_cell1(mp),ecEp_battery_cell2(mp),enEp-nem(pd),enEp_foot,enEp_head,enEp_SC1,enEp_stem_cell,enEp_tent-nem(pd)	ectoderm,endoderm	ecEp_battery_cell,enEp-nem,enEp_foot,enEp_head,enEp_SC1,enEp_stem_cell,enEp_tent-nem	head,foot,body
t7289aep	t7289aep|QCR2_BOVIN	PF00675.20;PF05193.21	Peptidase_M16;Peptidase_M16_C	P23004|QCR2_BOVIN Cytochrome b-c1 complex subunit 2, mitochondrial OS=Bos taurus (Bovine)	4.9e-84	PREDICTED: cytochrome b-c1 complex subunit 2, mitochondrial-like isoform X1 [Hydra vulgaris]	0	QCR2_BOVIN	FALSE	0.391197	1408	1	0.782393	0	i_nb1	interstitial	i_nb	body
t38440aep	t38440aep|AGGF1_MOUSE	PF01585.23;PF17780.1;PF00498.26;PF12656.7	G-patch;OCRE;FHA;G-patch_2	Q7TN31|AGGF1_MOUSE Angiogenic factor with G patch and FHA domains 1 OS=Mus musculus (Mouse)	2.36e-41	PREDICTED: angiogenic factor with G patch and FHA domains 1-like isoform X2 [Hydra vulgaris]	0	AGGF1_MOUSE	FALSE	0.390513	1409	1	0.781026	0	i_female_germline1,i_SC,i_stem_cell/progenitor	germ line,interstitial	i_female_germline,i_SC,i_stem_cell_progenitor	body
t19414aep	t19414aep|SURF4_CHICK	PF02077.15;PF05477.11	SURF4;SURF2	Q800K9|SURF4_CHICK Surfeit locus protein 4 OS=Gallus gallus (Chicken)	5.53e-90	PREDICTED: surfeit locus protein 4-like [Hydra vulgaris]	5.61e-157	SURF4_CHICK	FALSE	0.389812	1412	1	0.678056	0.101568	i_female_germline2_nurse,i_nb1,i_nb2,i_nb3,i_nb4	germ line,interstitial	i_female_germline,i_nb	body
t10484aep	t10484aep|NXNL2_MOUSE	PF13905.6;PF00085.20;PF08534.10;PF00578.21	Thioredoxin_8;Thioredoxin;Redoxin;AhpC-TSA	Q9D531|NXNL2_MOUSE Nucleoredoxin-like protein 2 OS=Mus musculus (Mouse)	1.33e-24	PREDICTED: nucleoredoxin-like protein 2 [Hydra vulgaris]	7.91e-83	NXNL2_MOUSE	FALSE	0.389145	1414	1	0.778291	0	ecEp_battery_cell2(mp),enEp-nem(pd),enEp_tent-nem(pd),i_nematocyte	ectoderm,endoderm,interstitial	ecEp_battery_cell,enEp-nem,enEp_tent-nem,i_nematocyte	head
t18156aep	t18156aep					PREDICTED: uncharacterized protein LOC100208944 [Hydra vulgaris]	0		FALSE	0.38912	1415	1	0.659781	0.11846	ecEp_basal_disk,ecEp_battery_cell1(mp),ecEp_battery_cell2(mp),ecEp_head,ecEp_stem_cell	ectoderm	ecEp_basal_disk,ecEp_battery_cell,ecEp_head,ecEp_stem_cell	foot,head,body
t8659aep	t8659aep|UB2G1_RAT	PF00179.26	UQ_con	P62255|UB2G1_RAT Ubiquitin-conjugating enzyme E2 G1 OS=Rattus norvegicus (Rat)	6.46e-88	PREDICTED: ubiquitin-conjugating enzyme E2 G1-like [Hydra vulgaris] >gi|828204956|ref|XP_012556451.1| PREDICTED: ubiquitin-conjugating enzyme E2 G1-like [Hydra vulgaris]	5.8e-119	UB2G1_RAT	FALSE	0.389116	1416	2	0.464595	0.313637	ecEp_battery_cell1(mp),i_male_germline	ectoderm,germ line	ecEp_battery_cell,i_male_germline	head,body
t37634aep	t37634aep|KELP_ARATH	PF02229.16	PC4	O65155|KELP_ARATH RNA polymerase II transcriptional coactivator KELP OS=Arabidopsis thaliana (Mouse-ear cress)	2.63e-13	PREDICTED: RNA polymerase II transcriptional coactivator-like [Hydra vulgaris]	2.15e-58	KELP_ARATH	FALSE	0.388844	1417	1	0.777689	0	i_female_germline1,i_female_germline2_nurse,i_male_germline,i_nb1,i_neuron/gland_cell_progenitor,i_SC,i_stem_cell/progenitor	germ line,interstitial	i_female_germline,i_male_germline,i_nb,i_neuron_progenitor,i_SC,i_stem_cell_progenitor	body
t12626aep	t12626aep|ARP2_XENTR	PF00022.19	Actin	Q5BL41|ARP2_XENTR Actin-related protein 2 OS=Xenopus tropicalis (Western clawed frog) (Silurana tropicalis)	0	PREDICTED: actin-related protein 2 [Hydra vulgaris]	0	ARP2_XENTR	FALSE	0.388135	1419	2	0.395594	0.380676	ecEp_battery_cell1(mp),ecEp_battery_cell2(mp),ecEp_head,i_female_germline2_nurse	ectoderm,germ line	ecEp_battery_cell,ecEp_head,i_female_germline	head,body
t24225aep	t24225aep|P4HTM_HUMAN	PF13640.6	2OG-FeII_Oxy_3	Q9NXG6|P4HTM_HUMAN Transmembrane prolyl 4-hydroxylase OS=Homo sapiens (Human)	8.54e-49	PREDICTED: transmembrane prolyl 4-hydroxylase-like [Hydra vulgaris]	0	P4HTM_HUMAN	FALSE	0.388132	1420	2	0.360293	0.41597	enEp_SC1,enEp_stem_cell	endoderm	enEp_SC1,enEp_stem_cell	body
[truncated: 2,047 more rows]

## Sheet: ecEp
geneid	gene	Pfam	Pfam annot	SP annot	SP eval	nr annot	nr eval	Swissprot	Validated	Avg	Rank	Detectable in N samples	RNA1	RNA2	cell cluster	cell lineage	cell type	anatomical group
[truncated: 627 more rows]

[truncated: 12 more sheets: ecEp,EnEp, enEp, i_, i_germline, i_nematoblast, i_neuron, i_nematocyte, i_gland, i_stem,i_SC, i_,enEp, i_,ecEp, i_,enEp,ecEp]
